# Supplementary material for: 6-Aryl-4-cycloamino-1,3,5-triazine-2-amines: synthesis, antileukemic activity, and 3D-QSAR modelling
Source: Royal Society of Chemistry journal article supplement (doi:10.1039/d3ra08091a), 2024-01-01

*Electronic Supplementary Information*

**6-Aryl-4-cycloamino-1,3,5-triazine-2-amines: Synthesis,  
antileukemic activity, and 3D-QSAR modeling**

*Muhammad Syafiq Bin Shahari,<sup>a</sup> Ahmad Junaid,<sup>b</sup>*

*Edward R. T. Tiekink<sup>c</sup> and Anton V. Dolzhenko<sup>\*de</sup>*

<sup>a</sup> Center for Drug Design, College of Pharmacy, University of Minnesota, Nils Hasselmo Hall, 312 Church Street SE, Mail Code 1191, Minneapolis, Minnesota 55455, USA

<sup>b</sup> Inimmune Corp., 1121 E Broadway St, Ste 106, Missoula, Montana 59802, USA

<sup>c</sup> Department of Chemistry, Universitat de les Illes Balears, Crta de Valldemossa km 7.5, 07122 Palma de Mallorca, Spain

<sup>d</sup> School of Pharmacy, Monash University Malaysia, Jalan Lagoon Selatan, Bandar Sunway, Selangor Darul Ehsan 47500, Malaysia

<sup>e</sup> Curtin Medical School, Curtin Health Innovation Research Institute, Faculty of Health Sciences, Curtin University, GPO Box U1987 Perth, Western Australia 6845, Australia

## Contents

|                                                                                                      |         |
|------------------------------------------------------------------------------------------------------|---------|
| Figure S1. Molecular packing diagrams for <b>9</b> {2,6} (CCDC 2310051)                              | S3      |
| Copies of $^1\text{H}$ and $^{13}\text{C}$ NMR spectra of prepared compounds <b>9</b> { <i>a,b</i> } | S4-S147 |

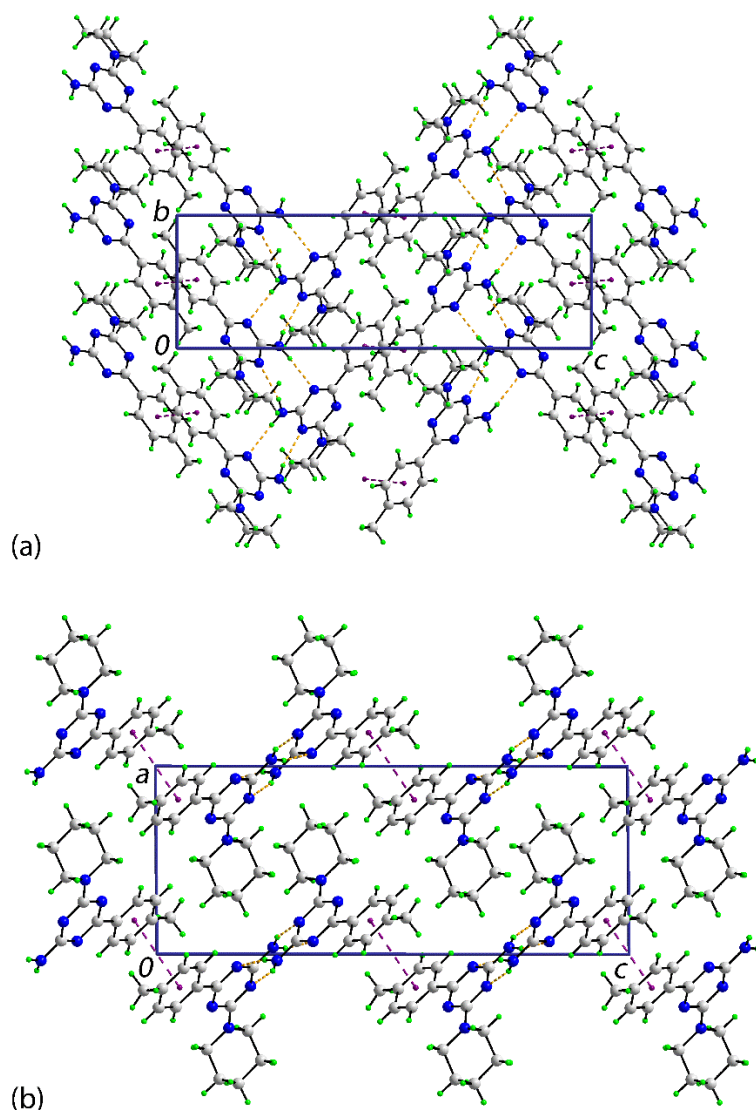

**Figure S1.** Molecular packing diagrams for **9**{2,6}: (a) a view of the supramolecular layer in the *bc*-plane and (b) a view of the unit-cell contents in projection down the *b*-axis. The amine-N–H $\cdots$ N(triazine) hydrogen-bonding and  $\pi$ -stacking interactions are highlighted as orange and purple dashed lines, respectively. Intermolecular contacts: N21–H1n $\cdots$ N3<sup>i</sup>: H1n $\cdots$ N3<sup>i</sup> = 2.327(12) Å, N21 $\cdots$ N3<sup>i</sup> = 3.1774(13) Å with angle at H1n = 161.7(12)°; N21–H2n $\cdots$ N1<sup>ii</sup>: N21–H2n $\cdots$ N1<sup>ii</sup> = 2.166(12) Å, N21 $\cdots$ N1<sup>ii</sup> = 3.0304(13) Å with angle at H2n = 167.3(13)°; ring centroid(C61–C66) $\cdots$ ring centroid(C61–C66)<sup>iii</sup> = 3.8345(7) Å with an off-set = 1.642 Å for symmetry operations (i)  $-x, \frac{1}{2}+y, \frac{1}{2}-z$ ; (ii)  $-x, -\frac{1}{2}+y, \frac{1}{2}-z$ ; (iii)  $-x, 2-y, 1-z$ .

6-(3-Fluorophenyl)-4-pyrrolidino-1,3,5-triazine-2-amine (9{1,2})

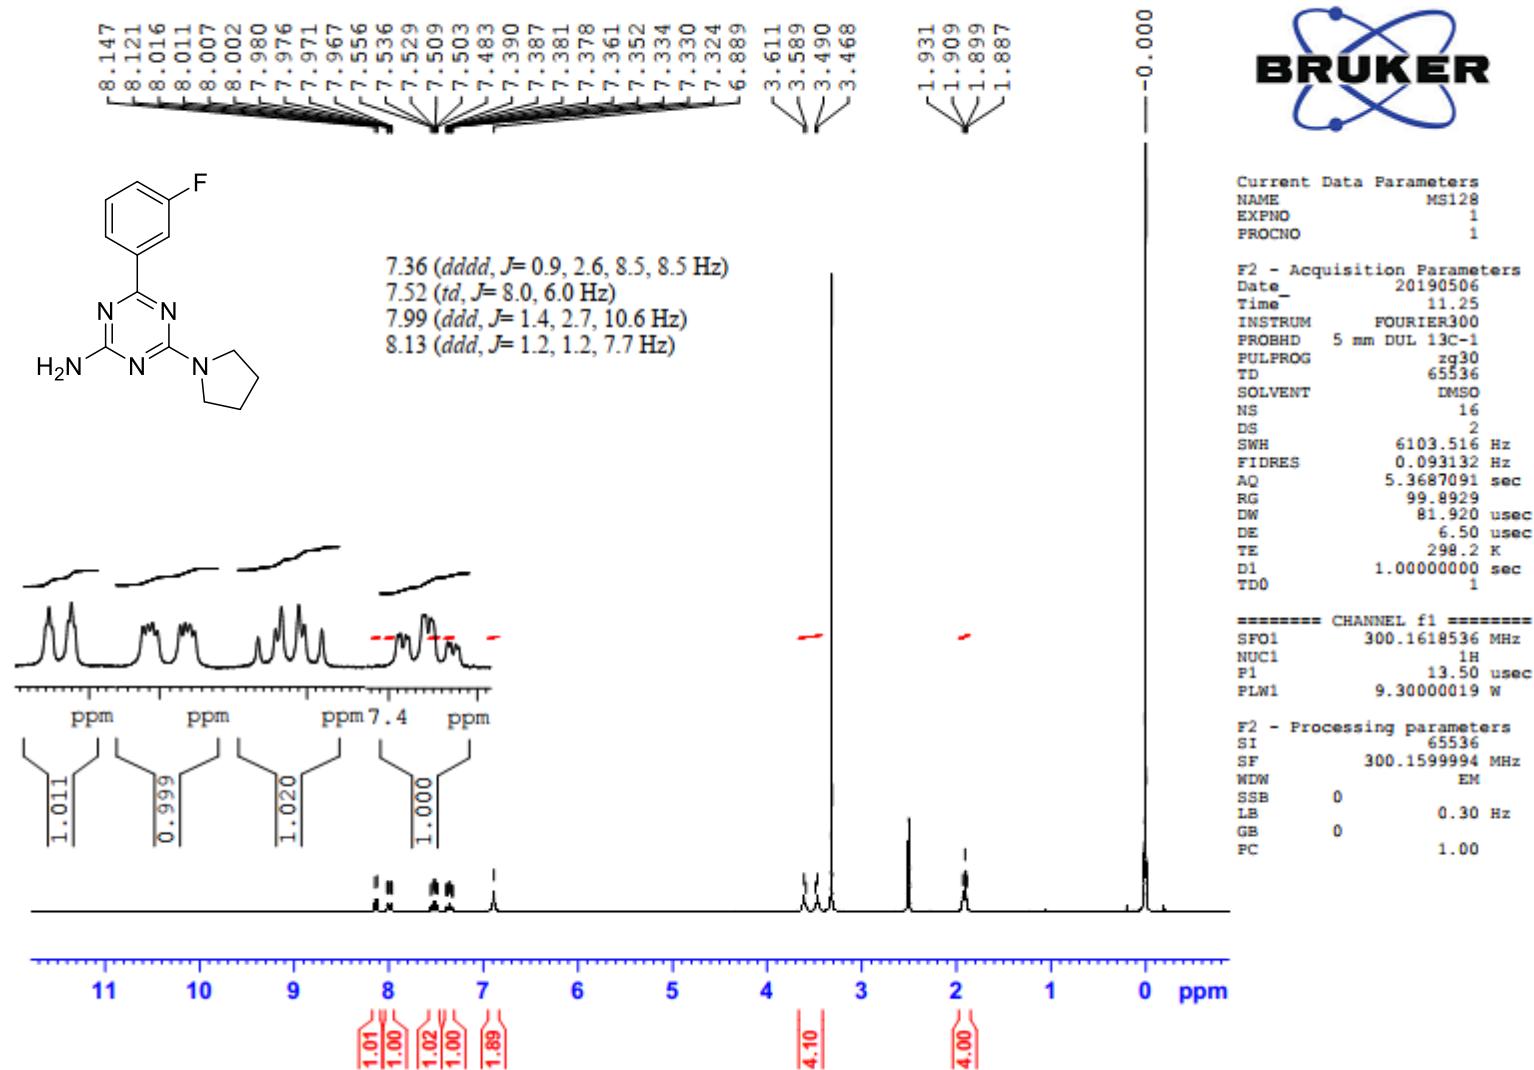



6-(3-Fluorophenyl)-4-pyrrolidino-1,3,5-triazine-2-amine (9{1,2})

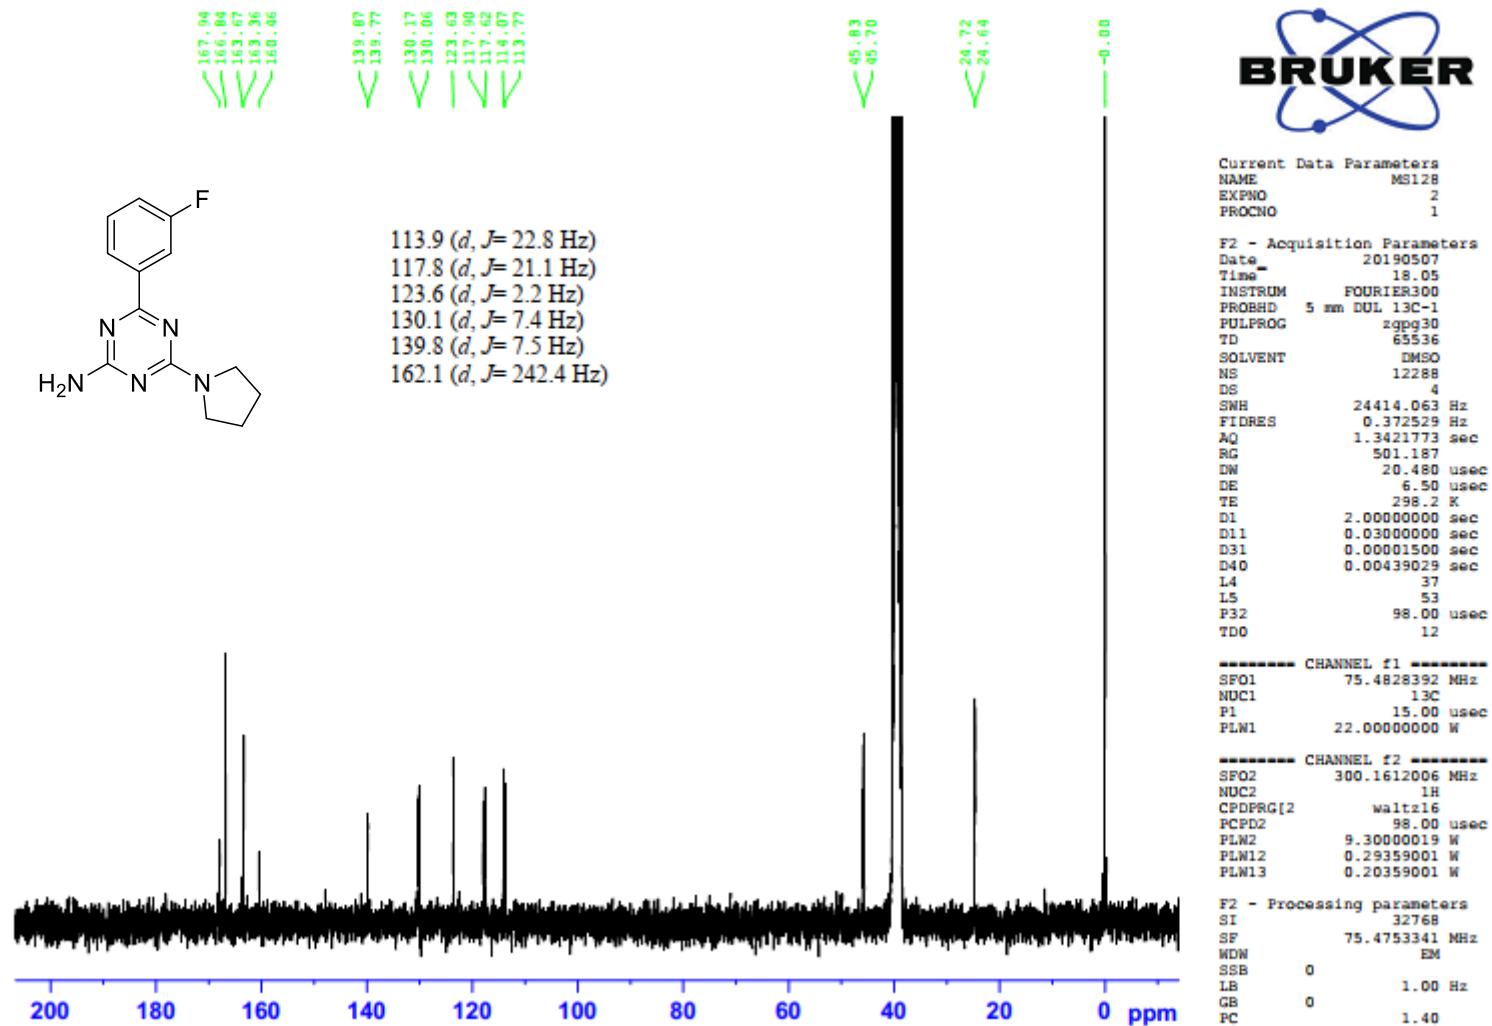

6-(4-Fluorophenyl)-4-pyrrolidino-1,3,5-triazine-2-amine (9{1,3})

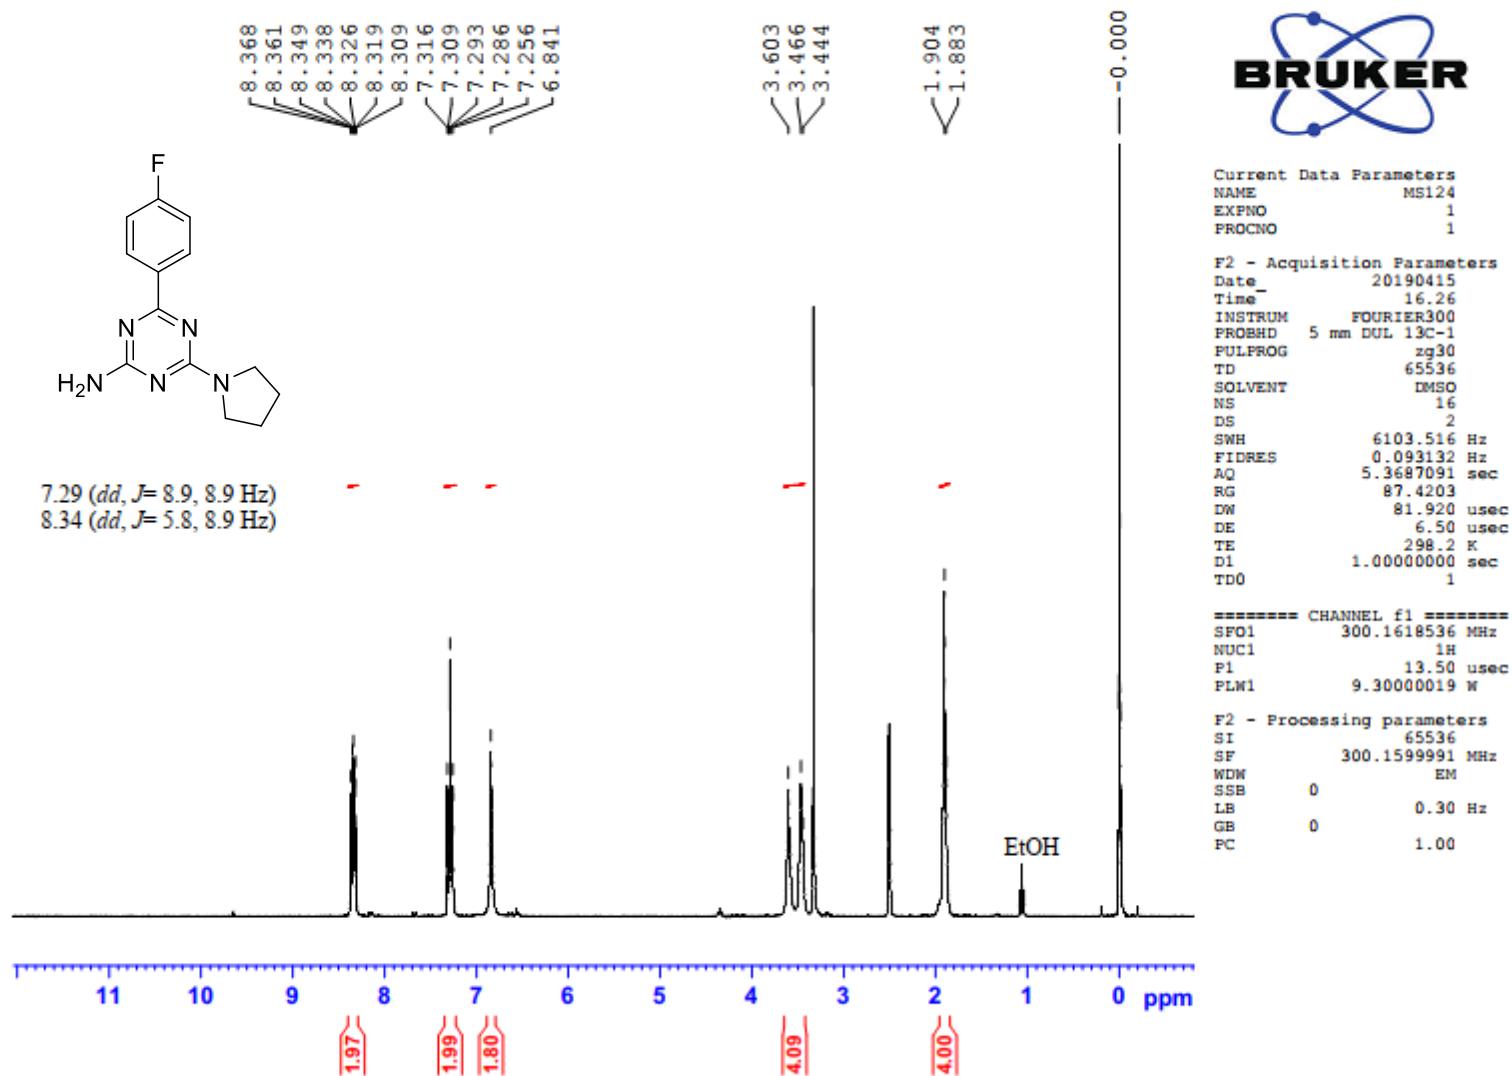

6-(4-Fluorophenyl)-4-pyrrolidino-1,3,5-triazine-2-amine (**9**{1,3})

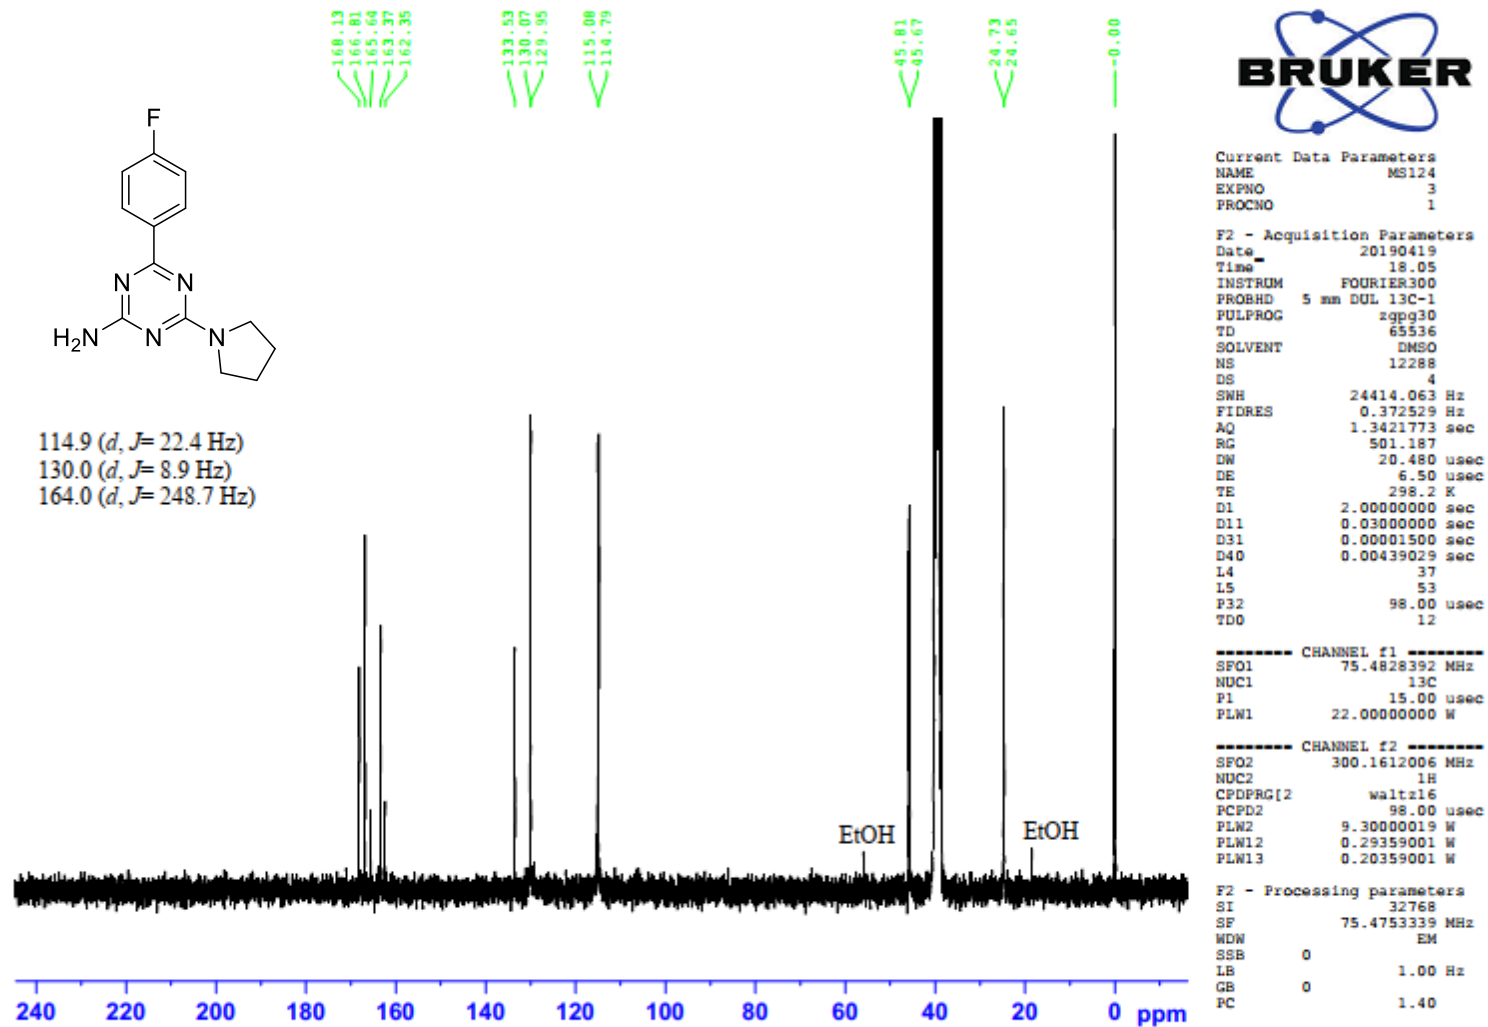

6-(3-Methylphenyl)-4-pyrrolidino-1,3,5-triazine-2-amine (9{1,5})

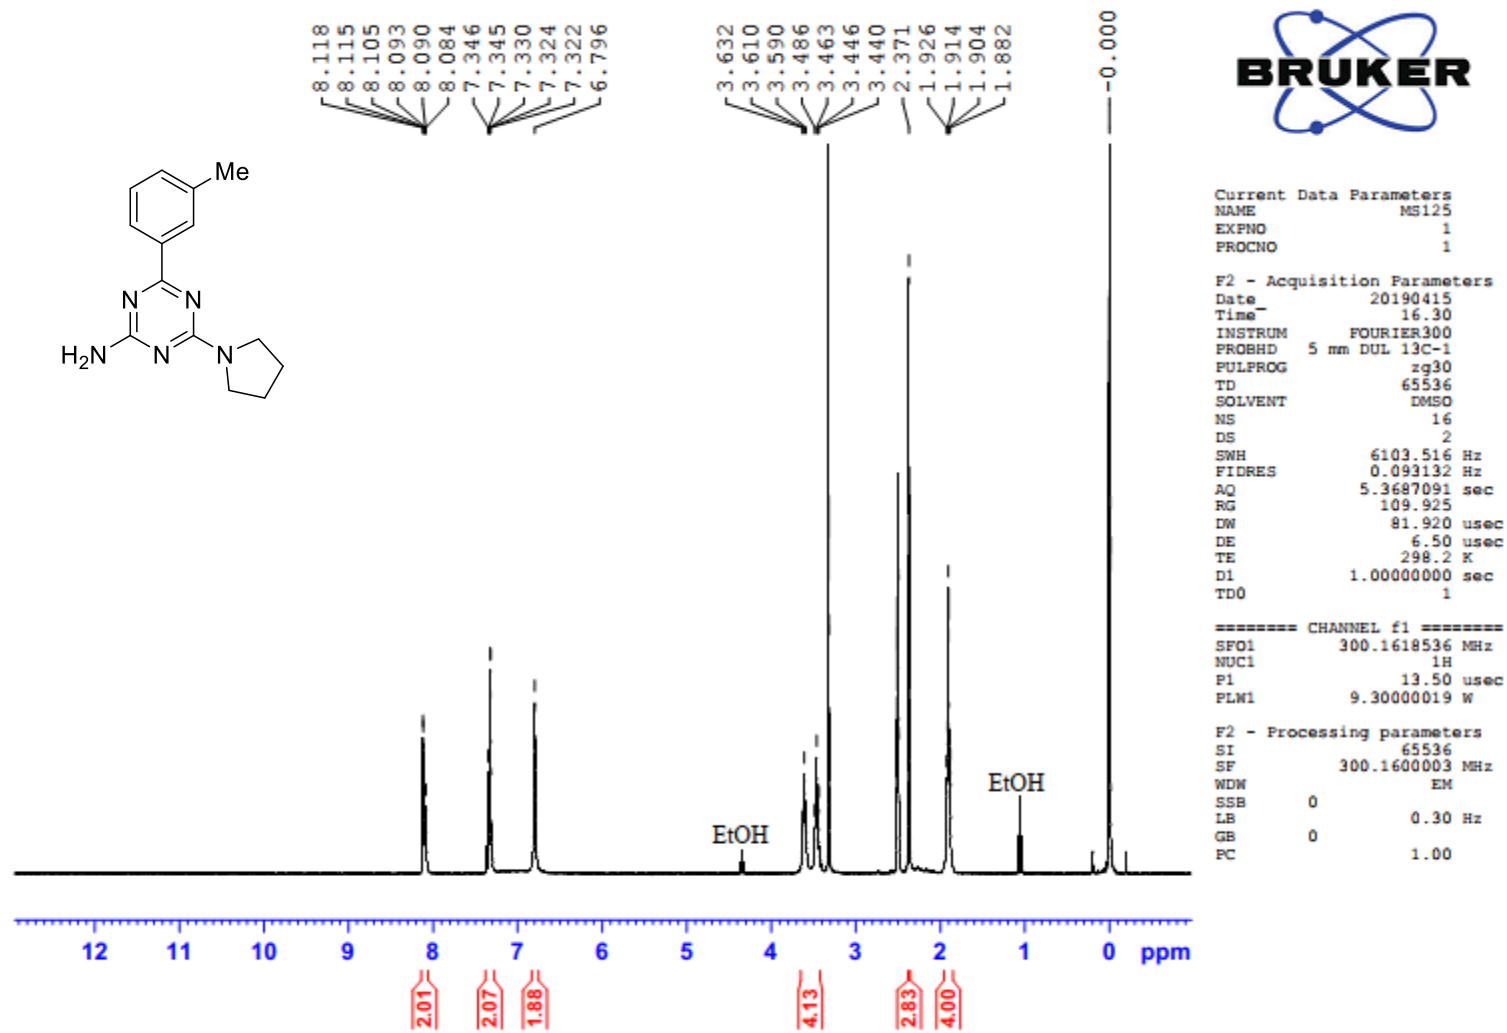

6-(3-Methylphenyl)-4-pyrrolidino-1,3,5-triazine-2-amine (**9**{1,5})

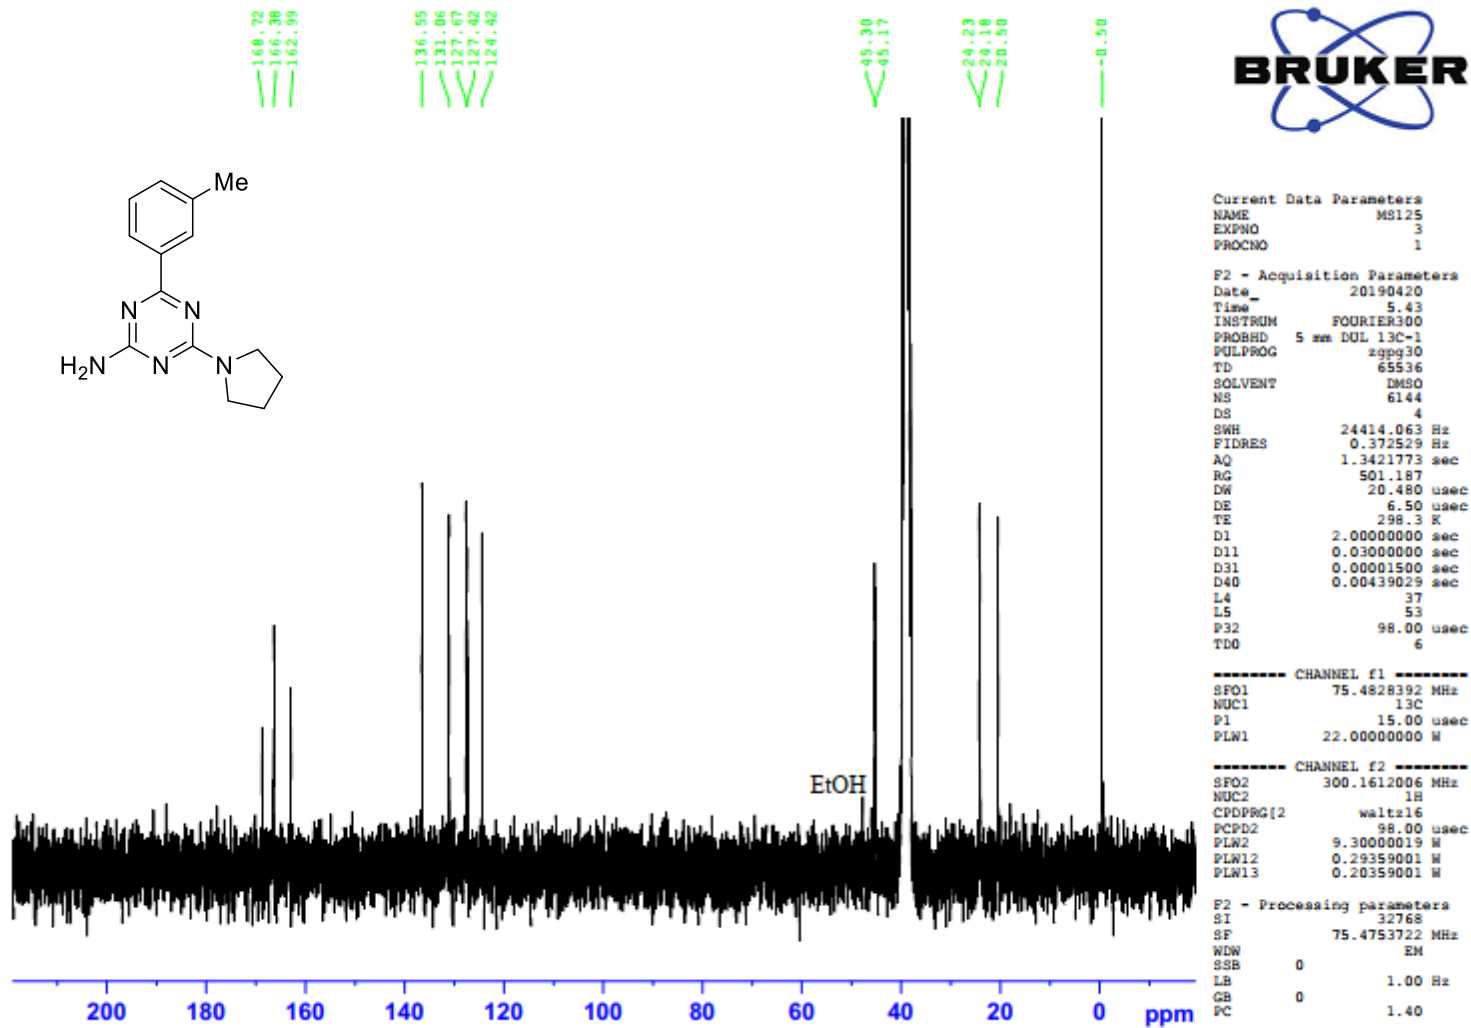

6-(4-Methylphenyl)-4-pyrrolidino-1,3,5-triazine-2-amine (**9**{1,6})

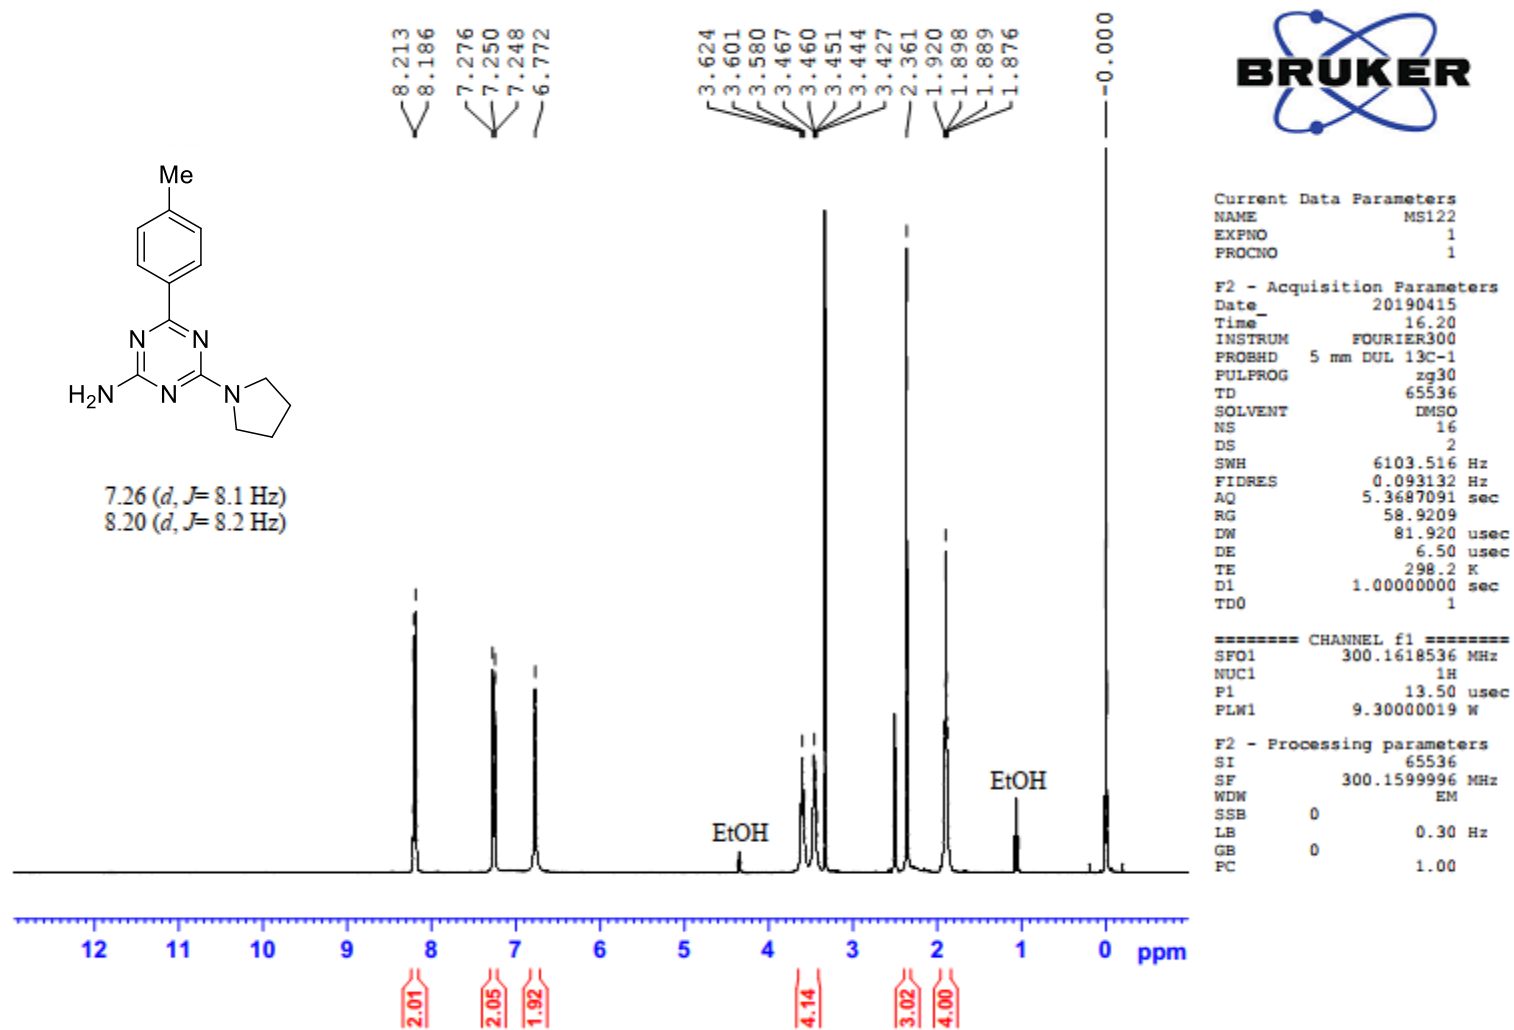

6-(4-Methylphenyl)-4-pyrrolidino-1,3,5-triazine-2-amine (**9**{1,6})

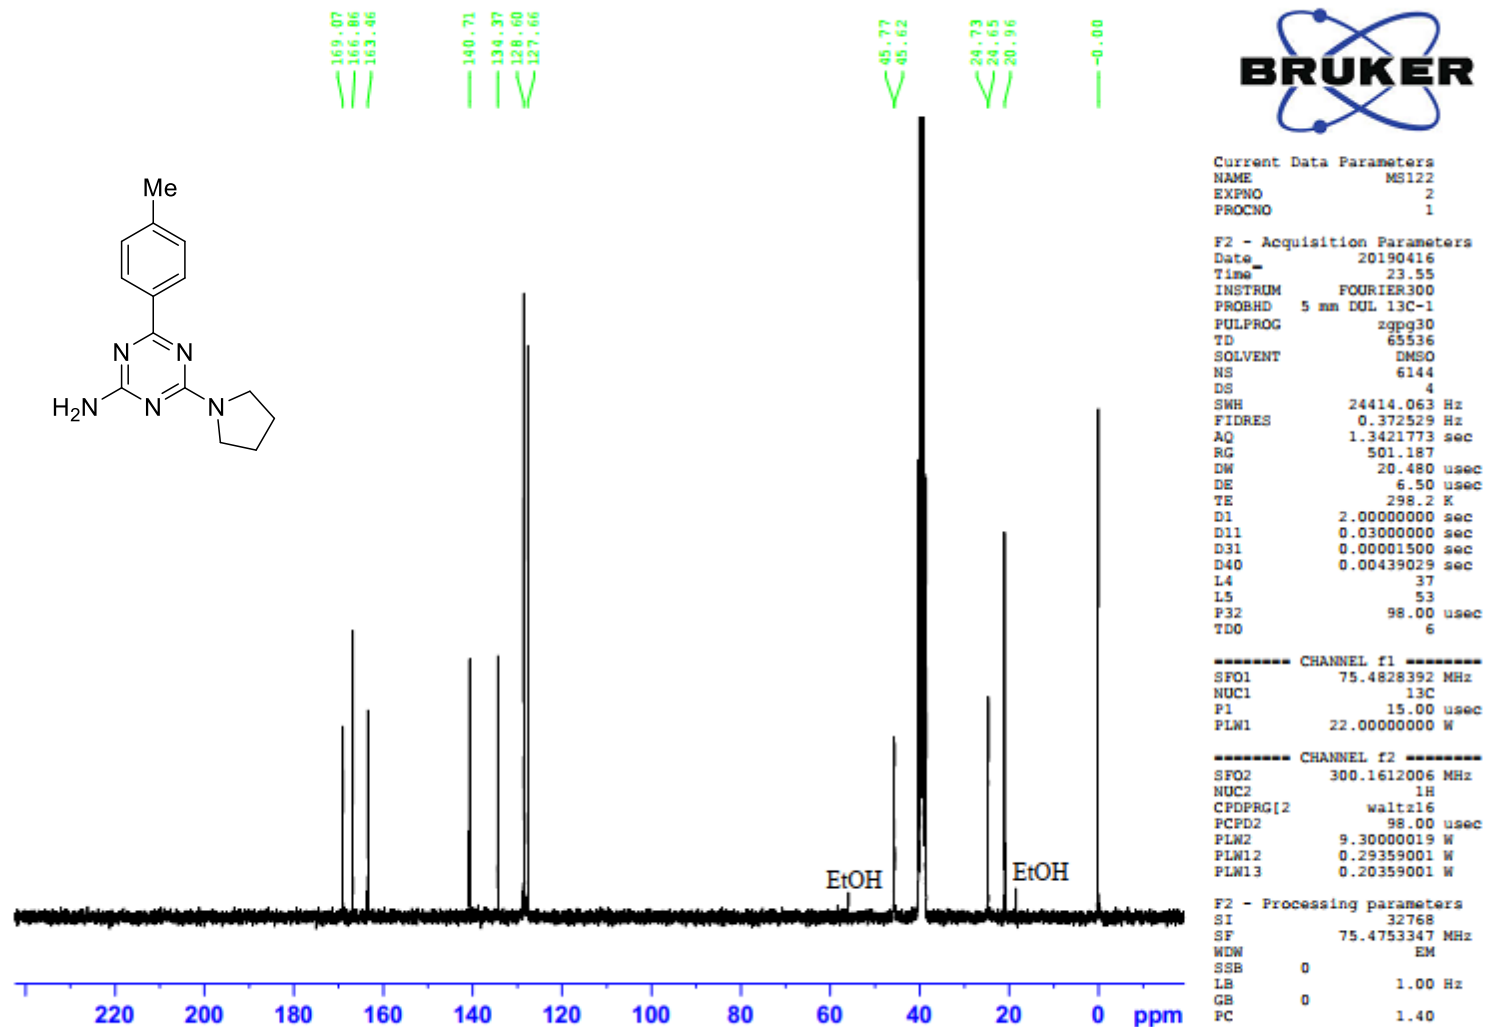

6-[4-(*tert*-Butyl)phenyl]-4-pyrrolidino-1,3,5-triazine-2-amine (9{1,7})

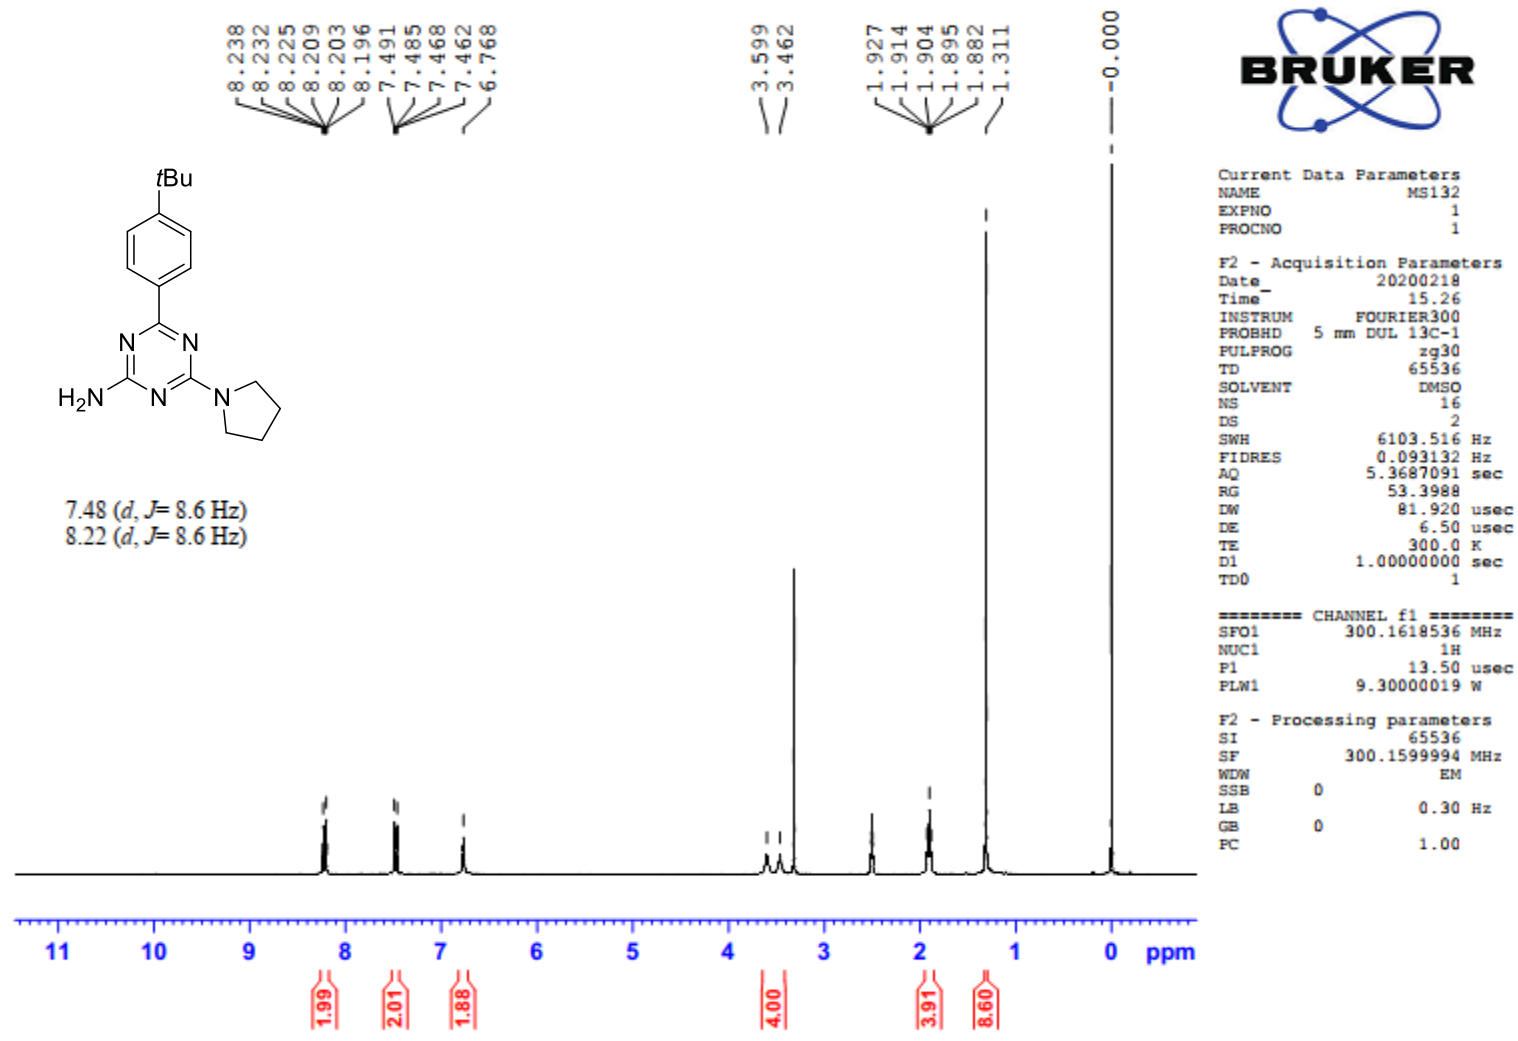



6-[4-(*tert*-Butyl)phenyl]-4-pyrrolidino-1,3,5-triazine-2-amine (**9**{1,7})

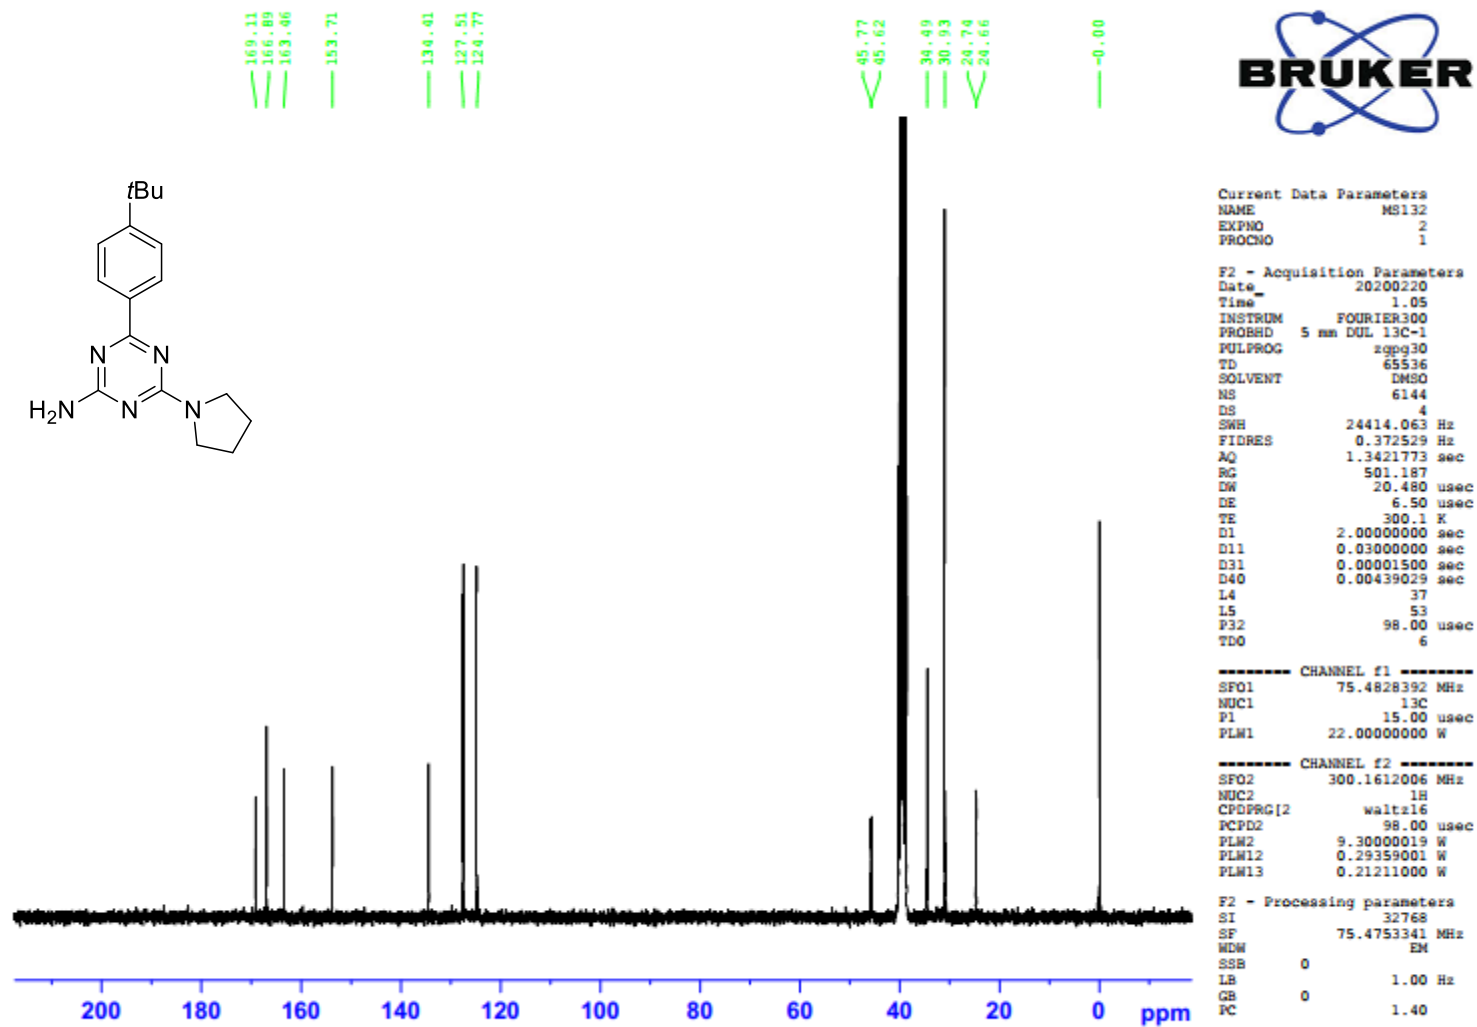

6-(4-Methoxyphenyl)-4-pyrrolidino-1,3,5-triazine-2-amine (9{1,9})

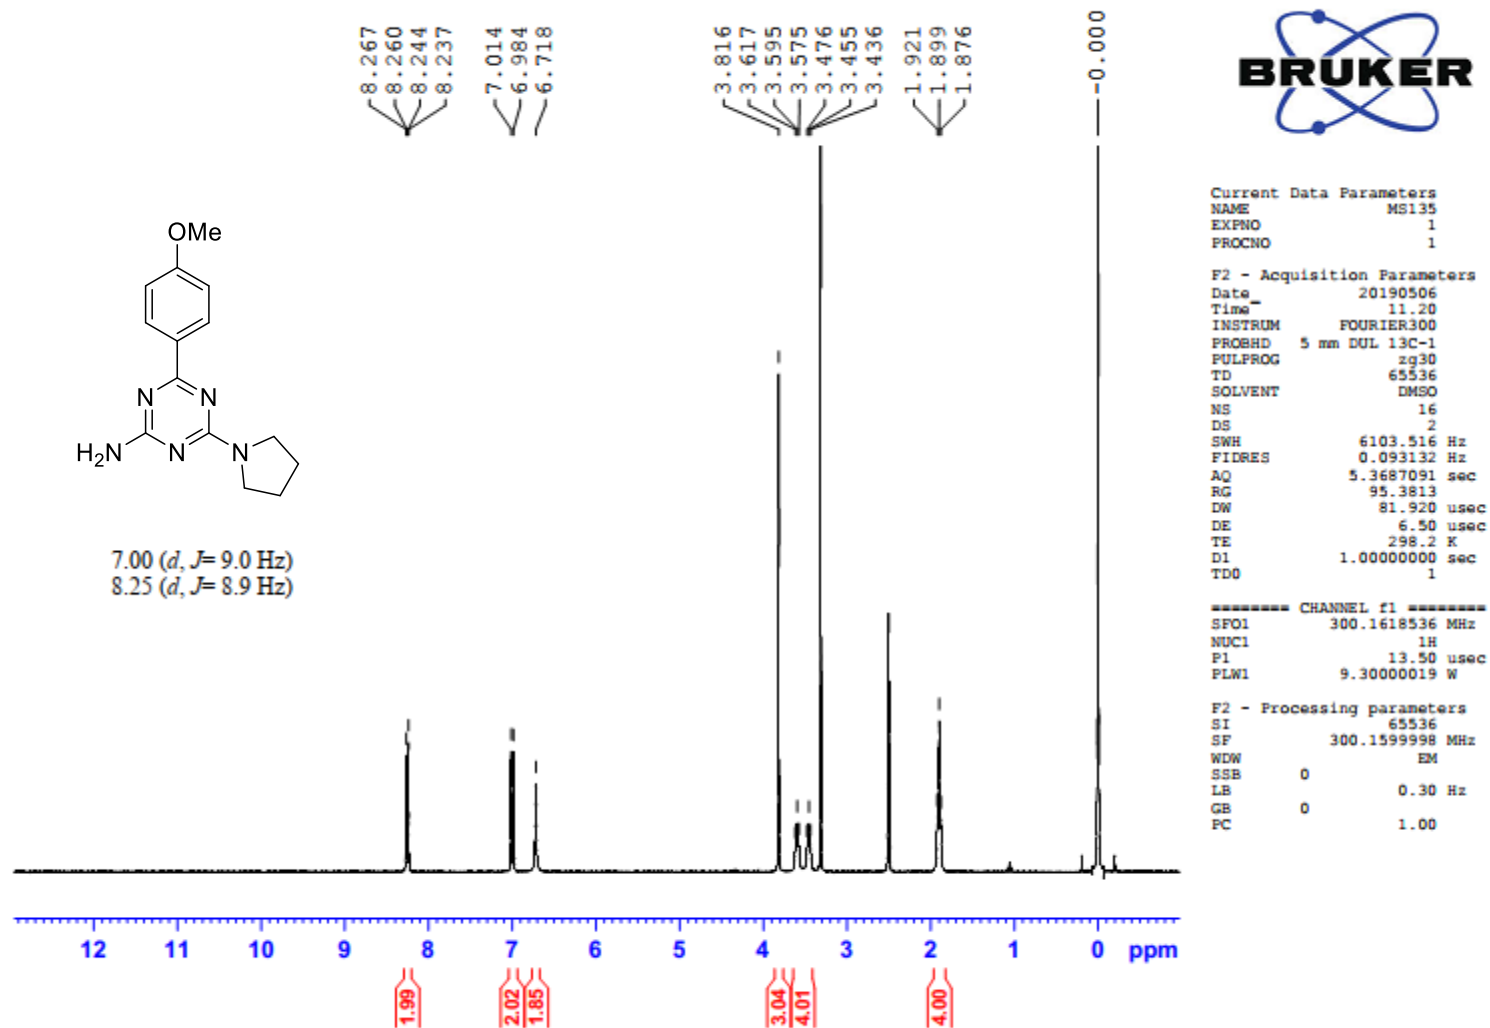

6-(4-Methoxyphenyl)-4-pyrrolidino-1,3,5-triazine-2-amine (9{1,9})

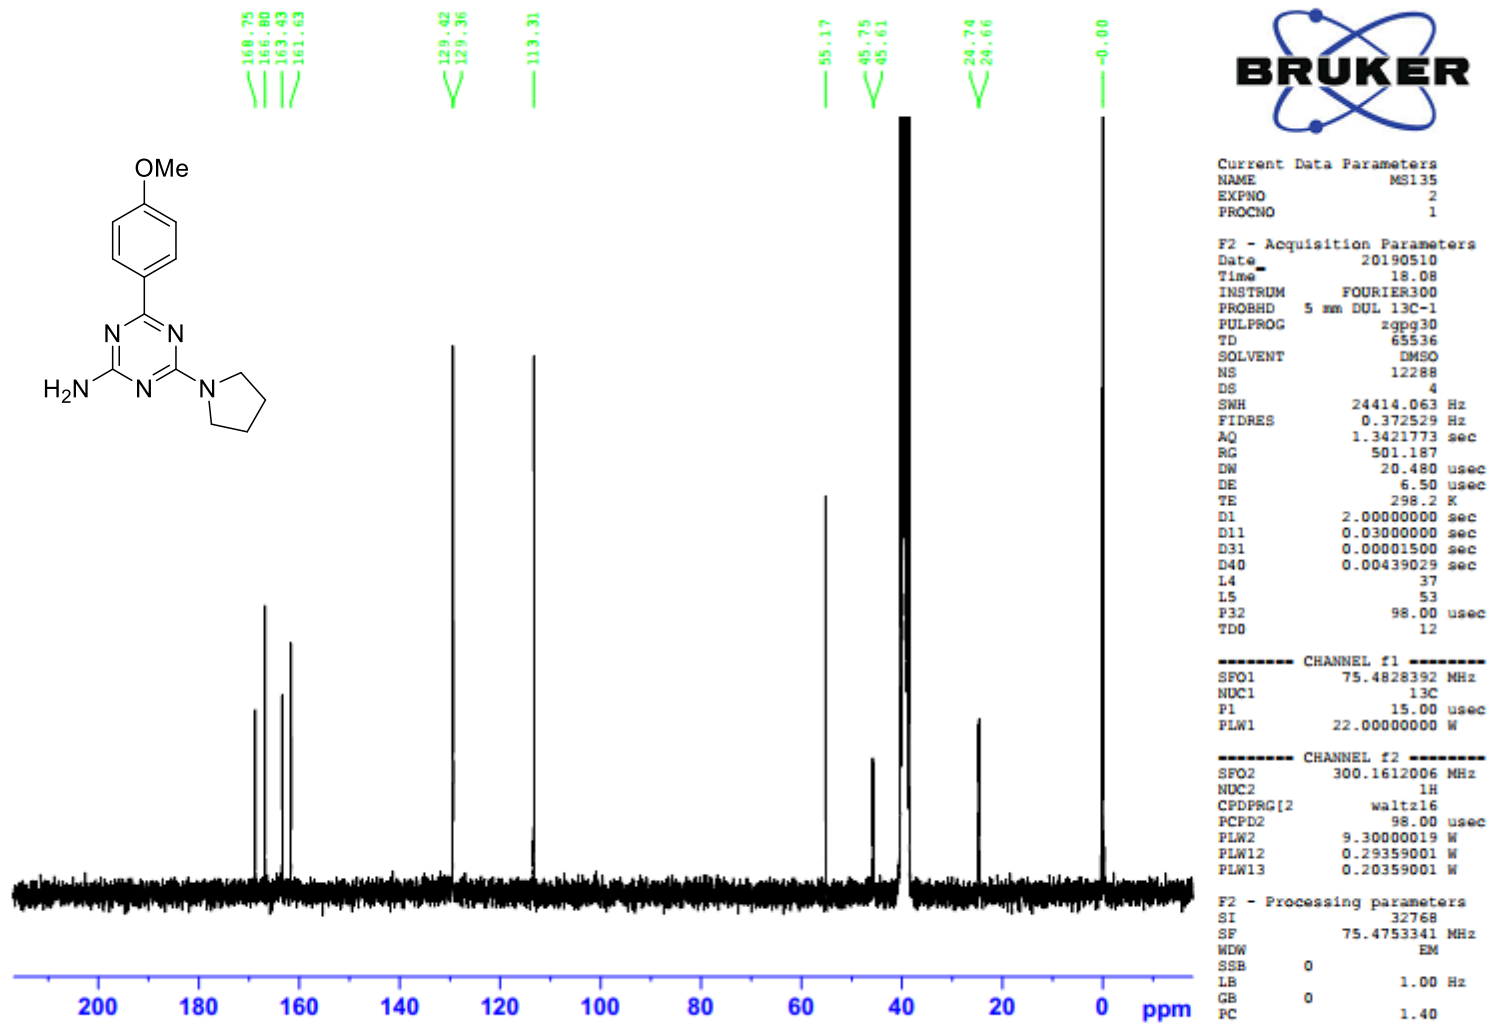

6-(3-Nitrophenyl)-4-pyrrolidino-1,3,5-triazine-2-amine (**9**{1,10})

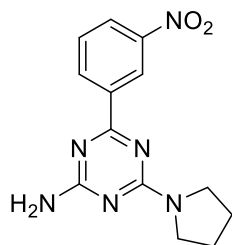

7.79 (*ddd*,  $J=0.4, 7.8, 8.2$  Hz)  
 8.38 (*ddd*,  $J=1.1, 2.5, 8.2$  Hz)  
 8.70 (*ddd*,  $J=1.1, 1.5, 7.7$  Hz)  
 9.06 (*ddd*,  $J=0.4, 1.6, 2.5$  Hz)

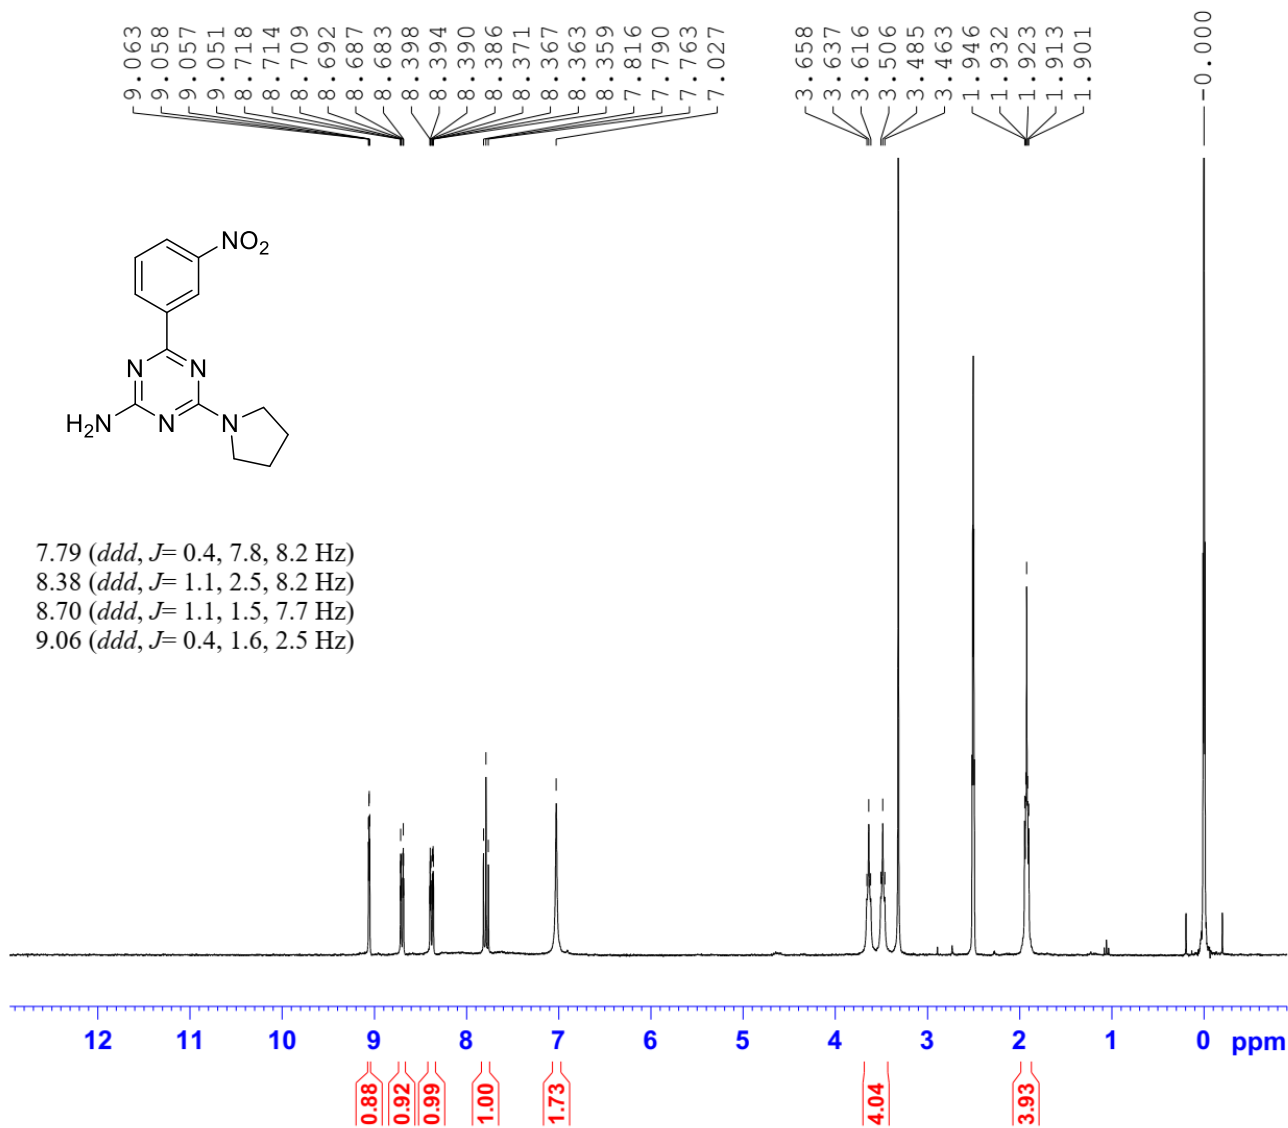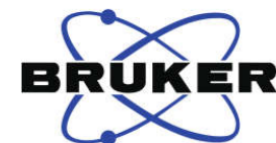

Current Data Parameters  
 NAME MS130  
 EXPNO 1  
 PROCNO 1

F2 - Acquisition Parameters  
 Date\_ 20190506  
 Time\_ 11.34  
 INSTRUM FOURIER300  
 PROBHD 5 mm DUL 13C-1  
 PULPROG zg30  
 TD 65536  
 SOLVENT DMSO  
 NS 16  
 DS 2  
 SWH 6103.516 Hz  
 FIDRES 0.093132 Hz  
 AQ 5.3687091 sec  
 RG 104.824  
 DW 81.920 usec  
 DE 6.50 usec  
 TE 298.2 K  
 D1 1.00000000 sec  
 TD0 1

==== CHANNEL f1 =====  
 SFO1 300.1618536 MHz  
 NUC1 1H  
 P1 13.50 usec  
 PLW1 9.30000019 W

F2 - Processing parameters  
 SI 65536  
 SF 300.1599992 MHz  
 WDW EM  
 SSB 0  
 LB 0.30 Hz  
 GB 0  
 PC 1.00

6-(3-Nitrophenyl)-4-pyrrolidino-1,3,5-triazine-2-amine (**9**{1,10})

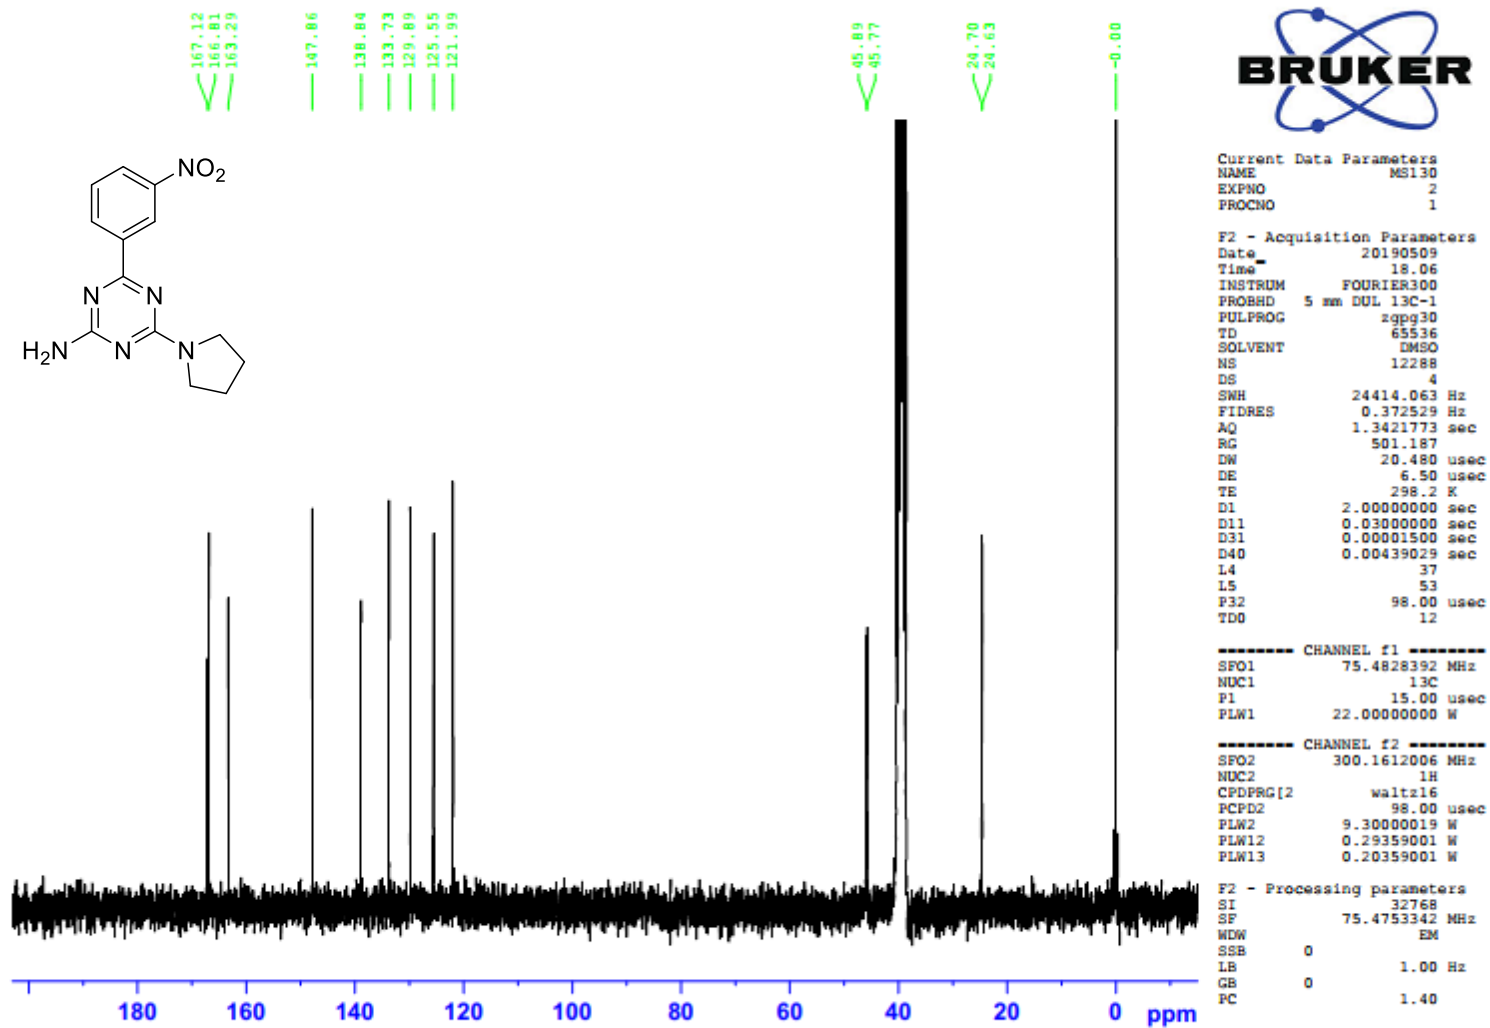

6-[4-(Trifluoromethyl)phenyl]-4-pyrrolidino-1,3,5-triazine-2-amine (9{1,11})

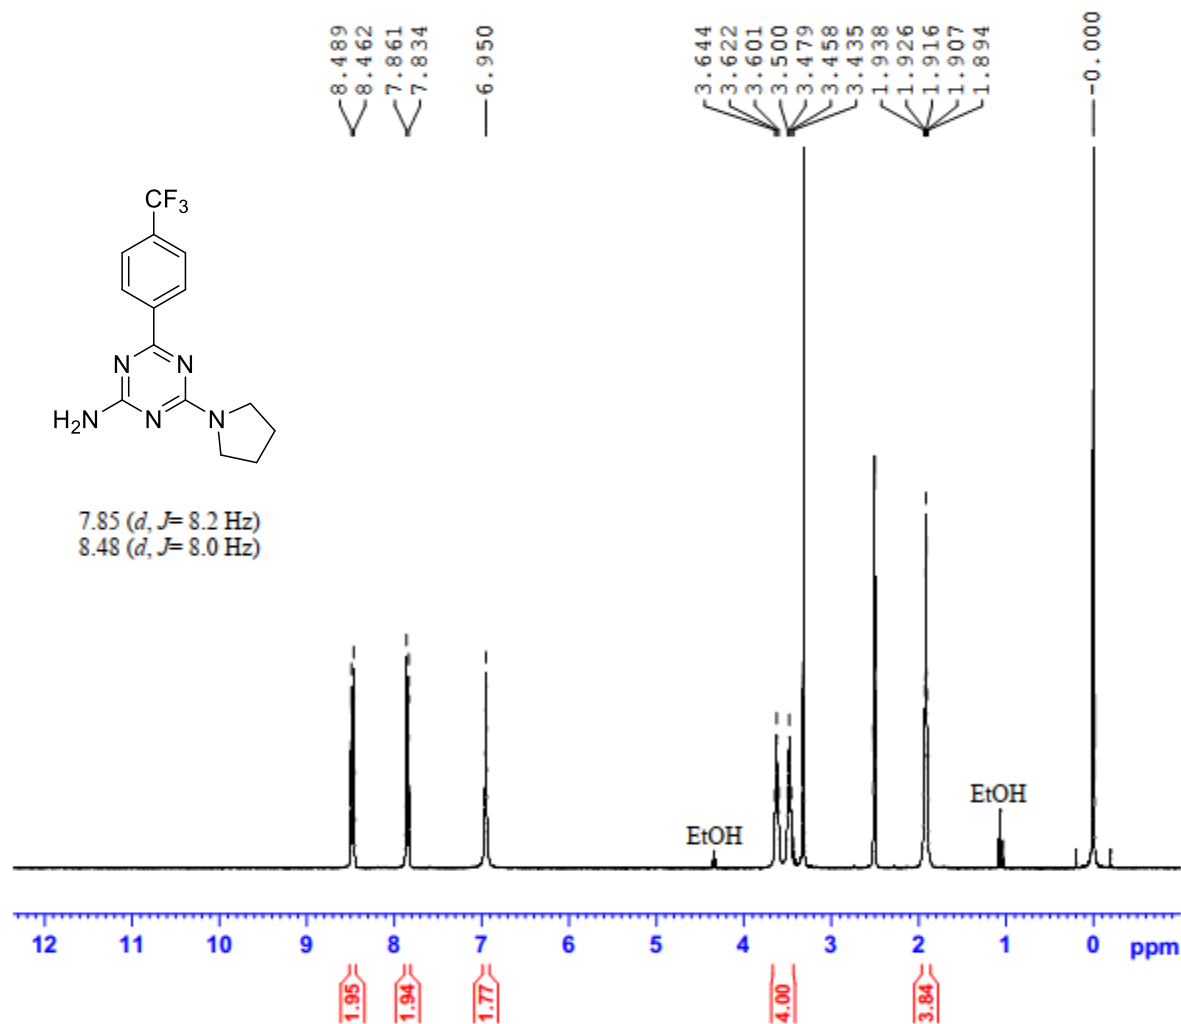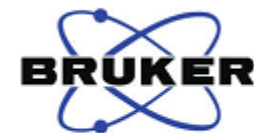

Current Data Parameters  
 NAME MS131  
 EXPNO 1  
 PROCNO 1

F2 - Acquisition Parameters  
 Date\_ 20200218  
 Time\_ 14.50  
 INSTRUM FOURIER300  
 PROBHD 5 mm DUL 13C-1  
 PULPROG zg30  
 TD 65536  
 SOLVENT DMSO  
 NS 16  
 DS 2  
 SWH 6103.516 Hz  
 FIDRES 0.093132 Hz  
 AQ 5.3687091 sec  
 RG 75.8656  
 DW 81.920 usec  
 DE 6.50 usec  
 TE 300.0 K  
 D1 1.00000000 sec  
 TDO 1

===== CHANNEL f1 =====  
 SFO1 300.1618536 MHz  
 NUC1 1H  
 P1 13.50 usec  
 PLW1 9.30000019 W

F2 - Processing parameters  
 SI 65536  
 SF 300.1599988 MHz  
 WDW EM  
 SSB 0  
 LB 0.30 Hz  
 GB 0  
 PC 1.00

6-[4-(Trifluoromethyl)phenyl]-4-pyrrolidino-1,3,5-triazine-2-amine (9{1,11})

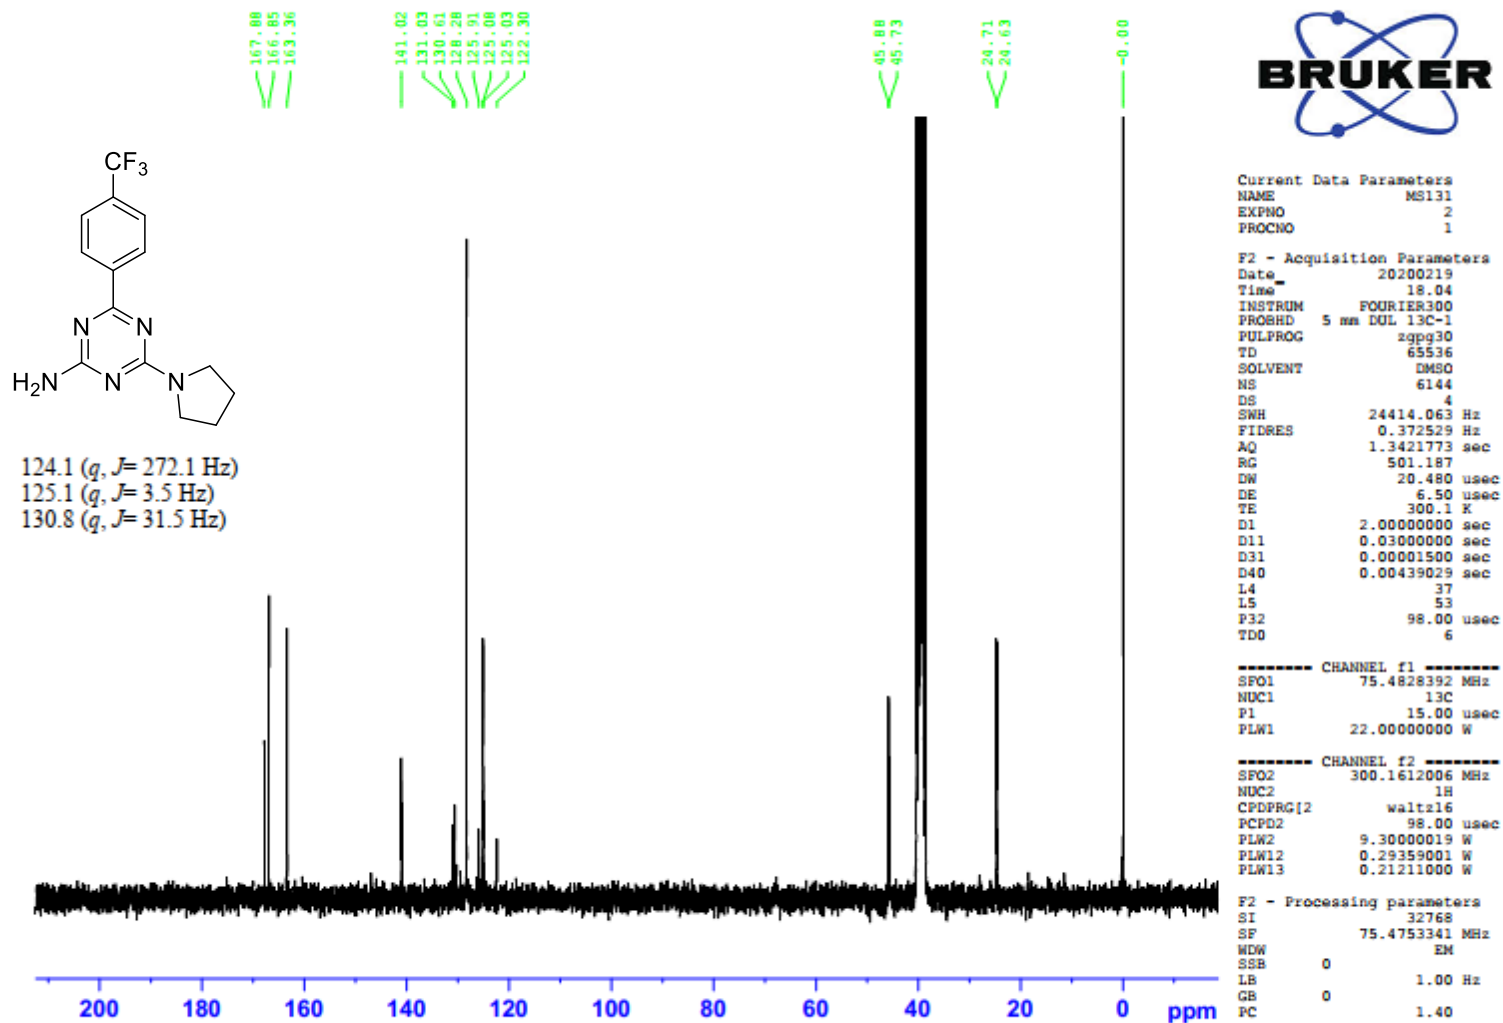

6-[4-(Trifluoromethoxy)phenyl]-4-pyrrolidino-1,3,5-triazine-2-amine (**9**{1,12})

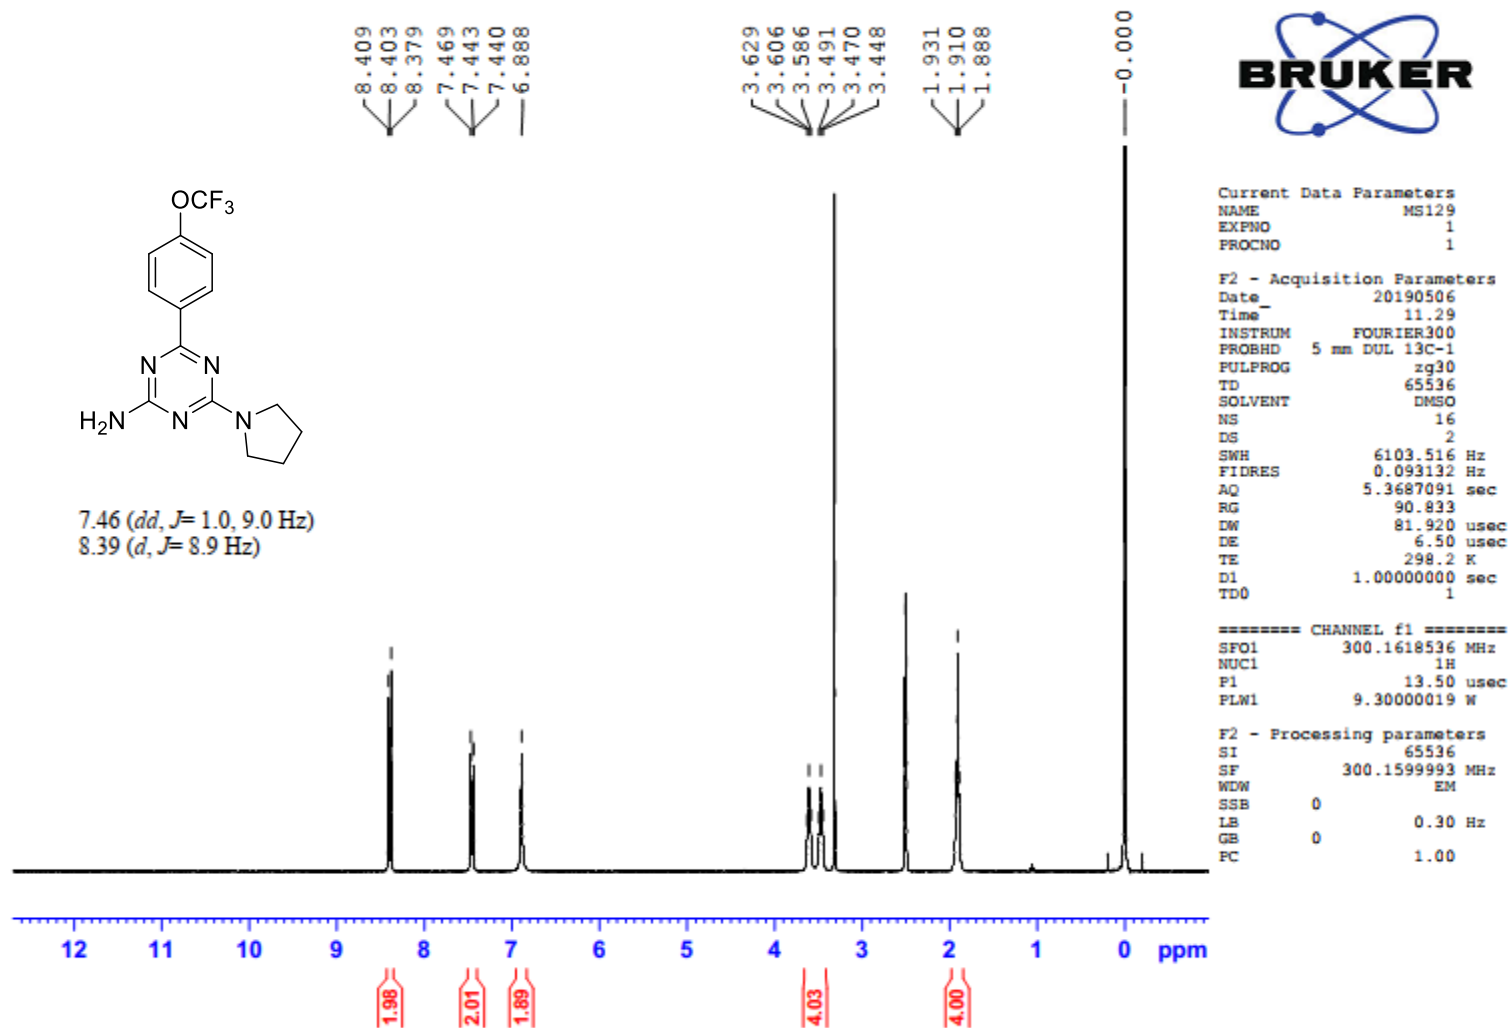



6-[4-(Trifluoromethoxy)phenyl]-4-pyrrolidino-1,3,5-triazine-2-amine (9{1,12})

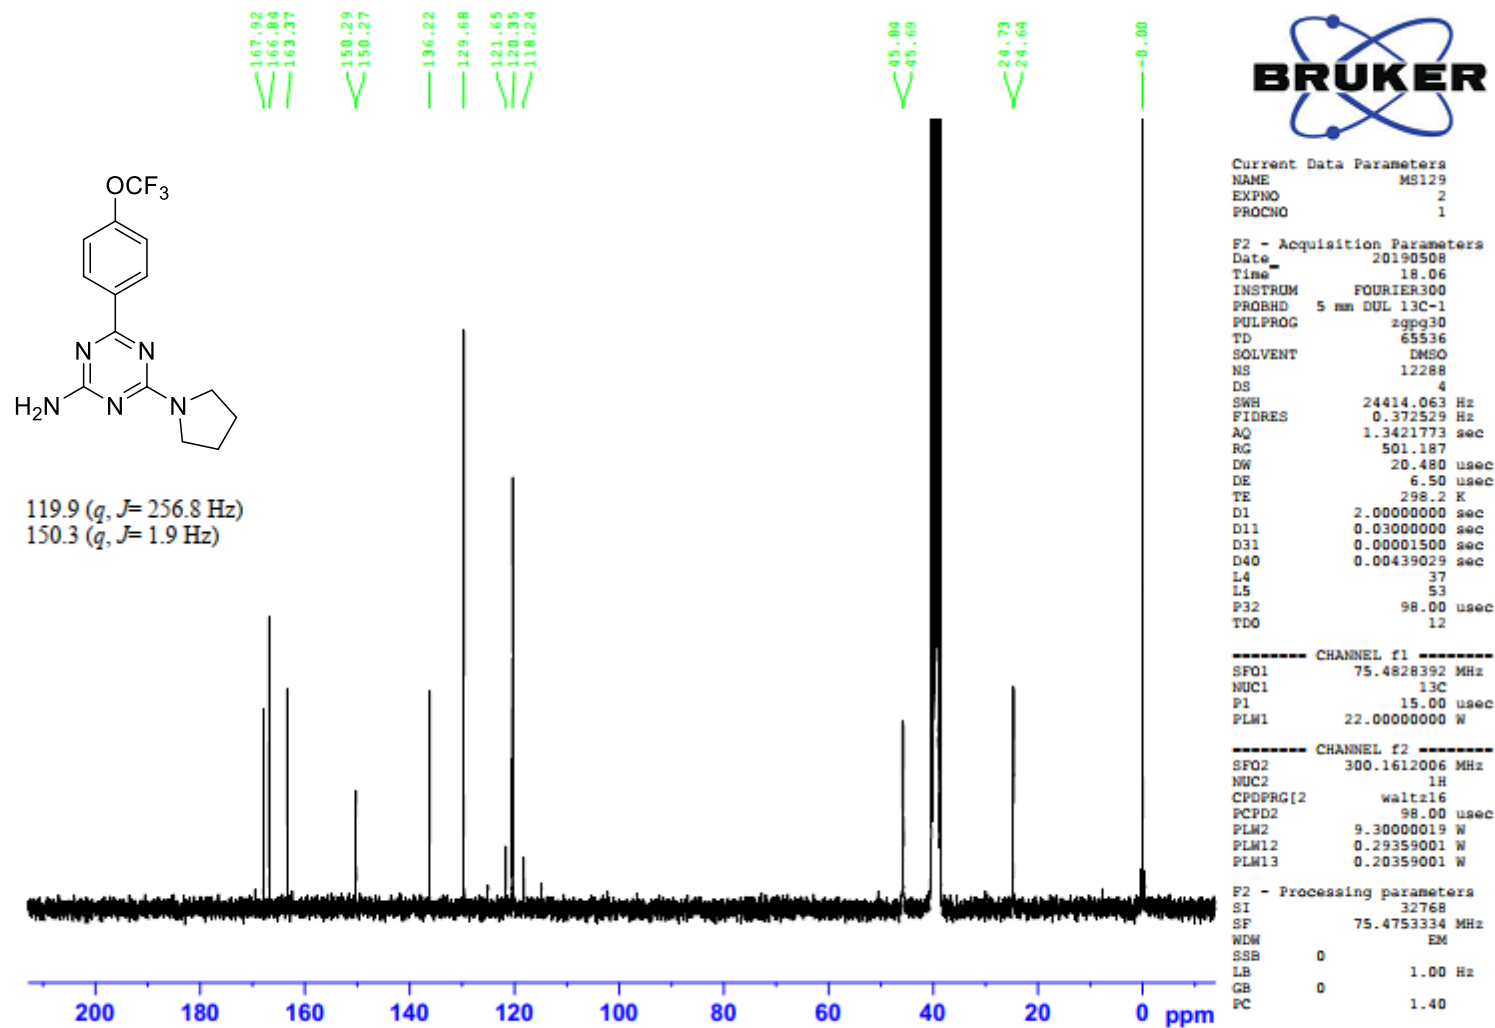

6-(3-Phenoxyphenyl)-4-pyrrolidino-1,3,5-triazine-2-amine (9{1,13})

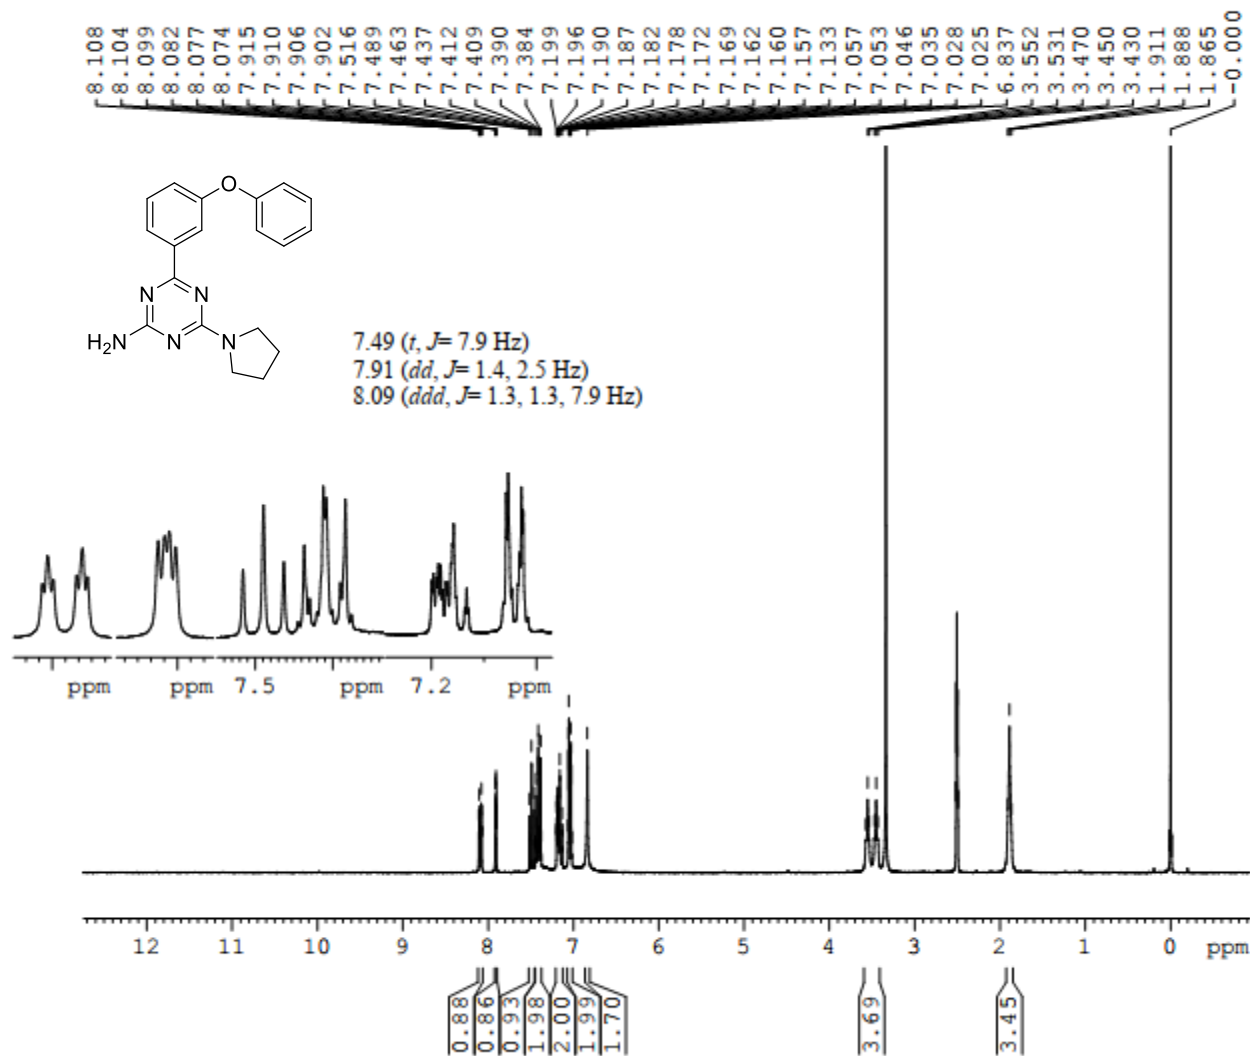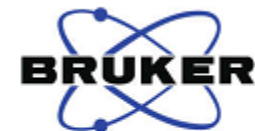

Current Data Parameters  
 NAME MS127  
 EXPNO 1  
 PROCNO 1

F2 - Acquisition Parameters  
 Date\_ 20190528  
 Time\_ 16.45  
 INSTRUM FOURIER300  
 PROBHD 5 mm DUL 13C-1  
 PULPROG zg30  
 TD 65536  
 SOLVENT DMSO  
 NS 16  
 DS 2  
 SWH 6103.702 Hz  
 FIDRES 0.093135 Hz  
 AQ 5.3685451 sec  
 RG 79.4328  
 DW 81.918 usec  
 DE 6.50 usec  
 TE 298.2 K  
 D1 1.00000000 sec  
 TD0 1

===== CHANNEL f1 =====  
 SFO1 300.1618536 MHz  
 NUC1 1H  
 P1 13.50 usec  
 PLW1 9.30000019 W

F2 - Processing parameters  
 SI 65536  
 SF 300.1599995 MHz  
 WDW EM  
 SSB 0  
 LB 0.30 Hz  
 GB 0  
 PC 1.00

6-(3-Phenoxyphenyl)-4-pyrrolidino-1,3,5-triazine-2-amine (9{1,13})

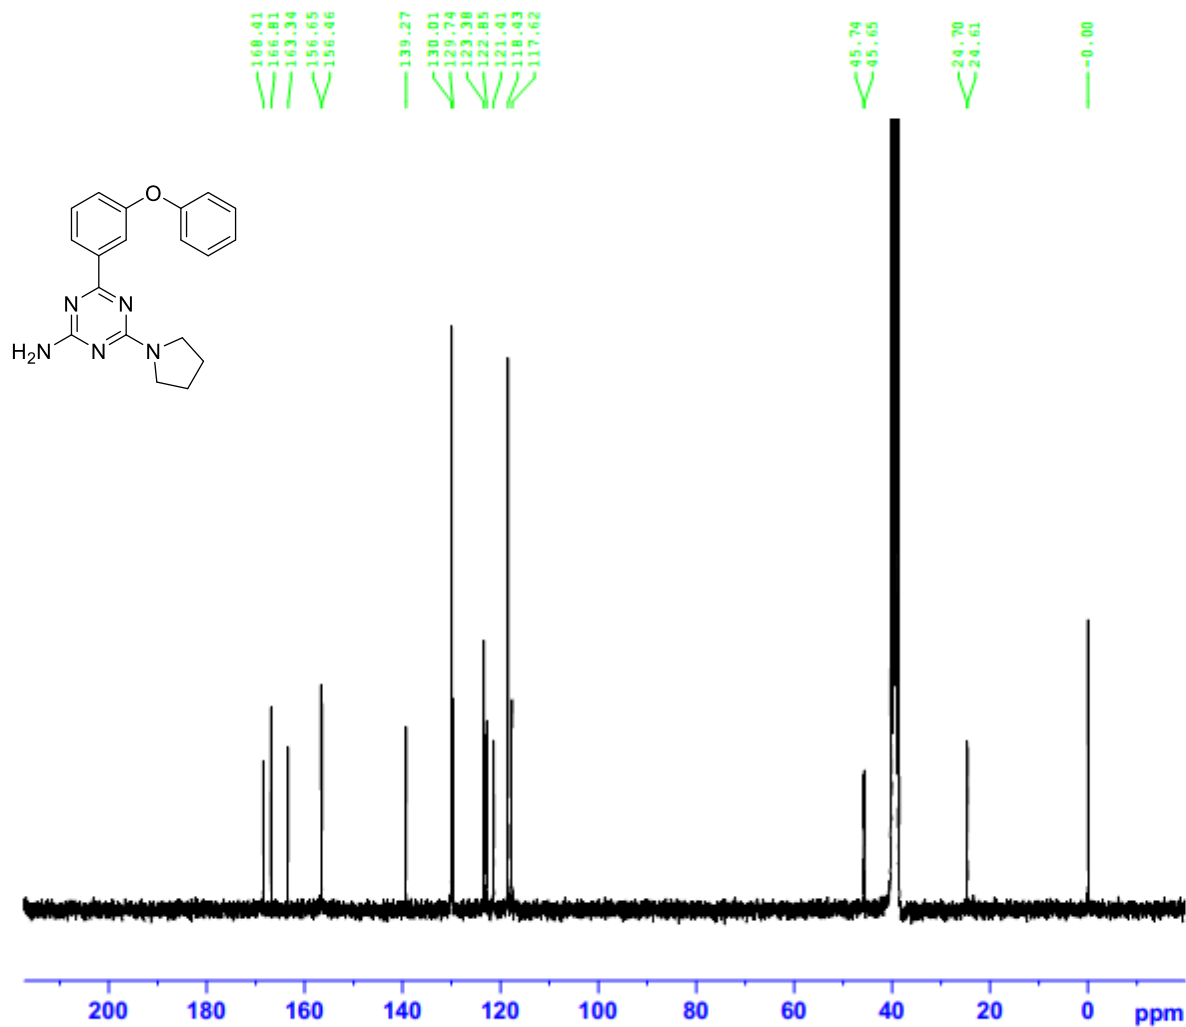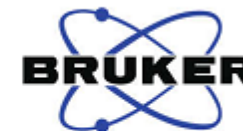

Current Data Parameters  
NAME MS127  
EXPNO 2  
PROCNO 1

F2 - Acquisition Parameters  
Date\_ 20190529  
Time 20.59  
INSTRUM FOURIER300  
PROBHD 5 mm DUL 13C-1  
PULPROG zgpg30  
TD 65536  
SOLVENT DMSO  
NS 12288  
DS 4  
SWH 24414.063 Hz  
FIDRES 0.372529 Hz  
AQ 1.3421773 sec  
RG 501.187  
DM 20.480 usec  
DE 6.50 usec  
TE 298.2 K  
D1 2.00000000 sec  
D11 0.03000000 sec  
D31 0.00001500 sec  
D40 0.00439029 sec  
L4 37  
L5 53  
P32 98.00 usec  
TDO 12

----- CHANNEL f1 -----  
SFO1 75.4828392 MHz  
NUC1 13C  
P1 15.00 usec  
PLW1 22.00000000 W

----- CHANNEL f2 -----  
SFO2 300.1612006 MHz  
NUC2 1H  
CNPFRG[2] waltz16  
PCPD2 98.00 usec  
PLW2 9.30000015 W  
PLW12 0.29359001 W  
PLW13 0.20359001 W

F2 - Processing parameters  
SI 32768  
SF 75.4753350 MHz  
WDW EM  
SSB 0  
LB 1.00 Hz  
GB 0  
PC 1.40

6-[4-(Benzyloxy)phenyl]-4-pyrrolidino-1,3,5-triazine-2-amine (**9**{1,15})

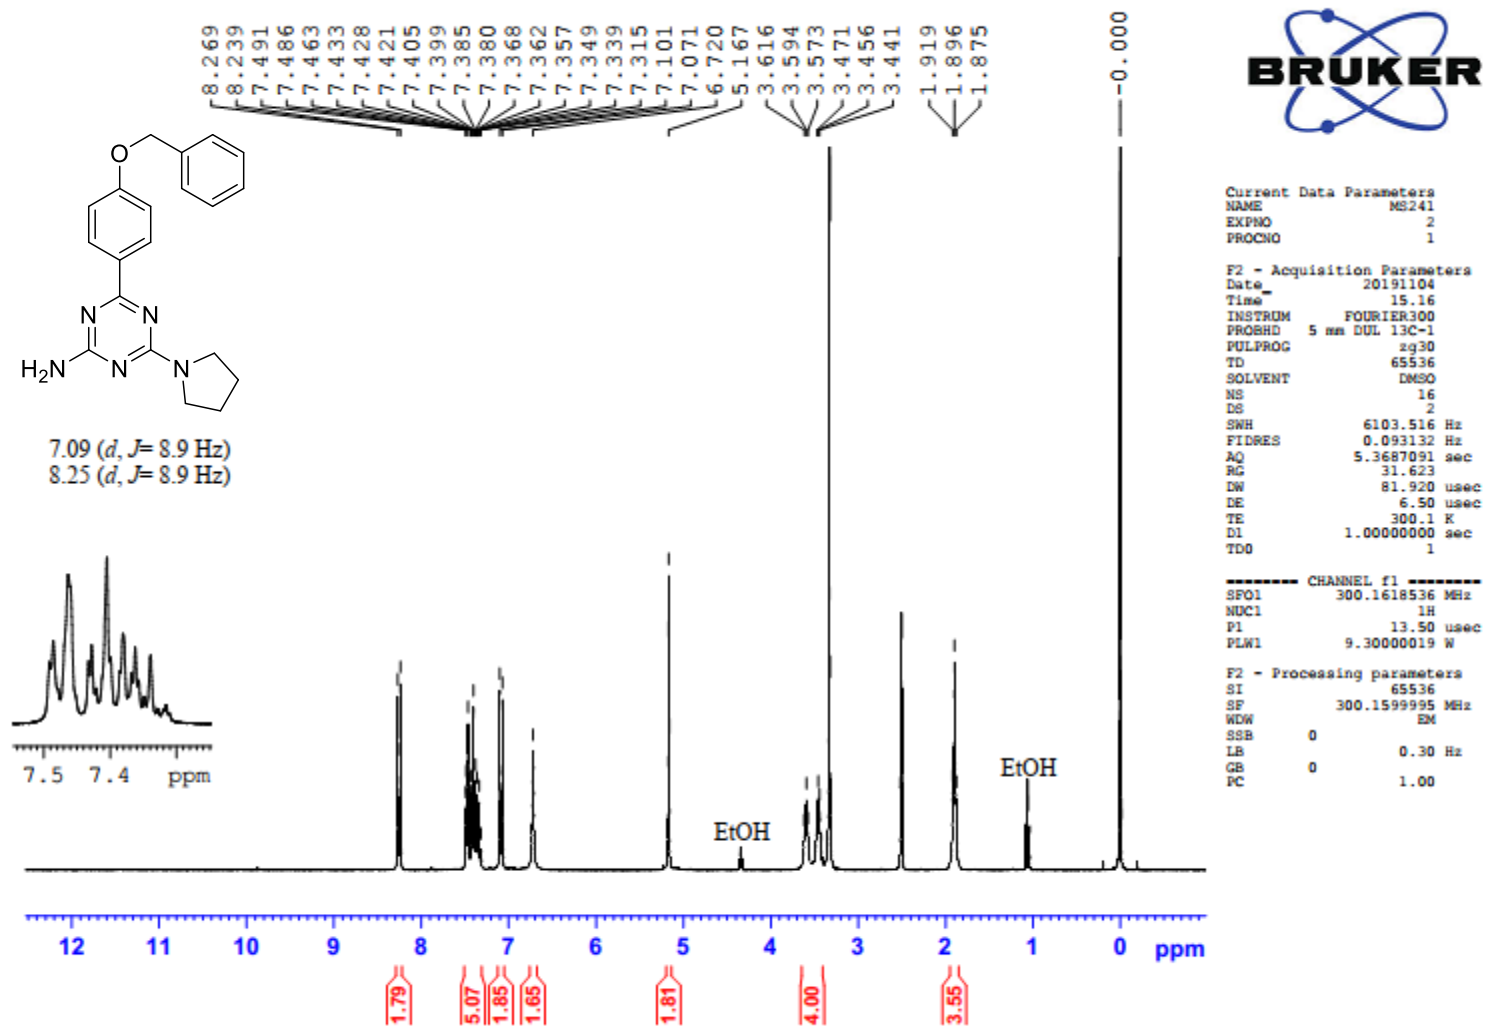

6-[4-(Benzyloxy)phenyl]-4-pyrrolidino-1,3,5-triazine-2-amine (**9**{1,15})

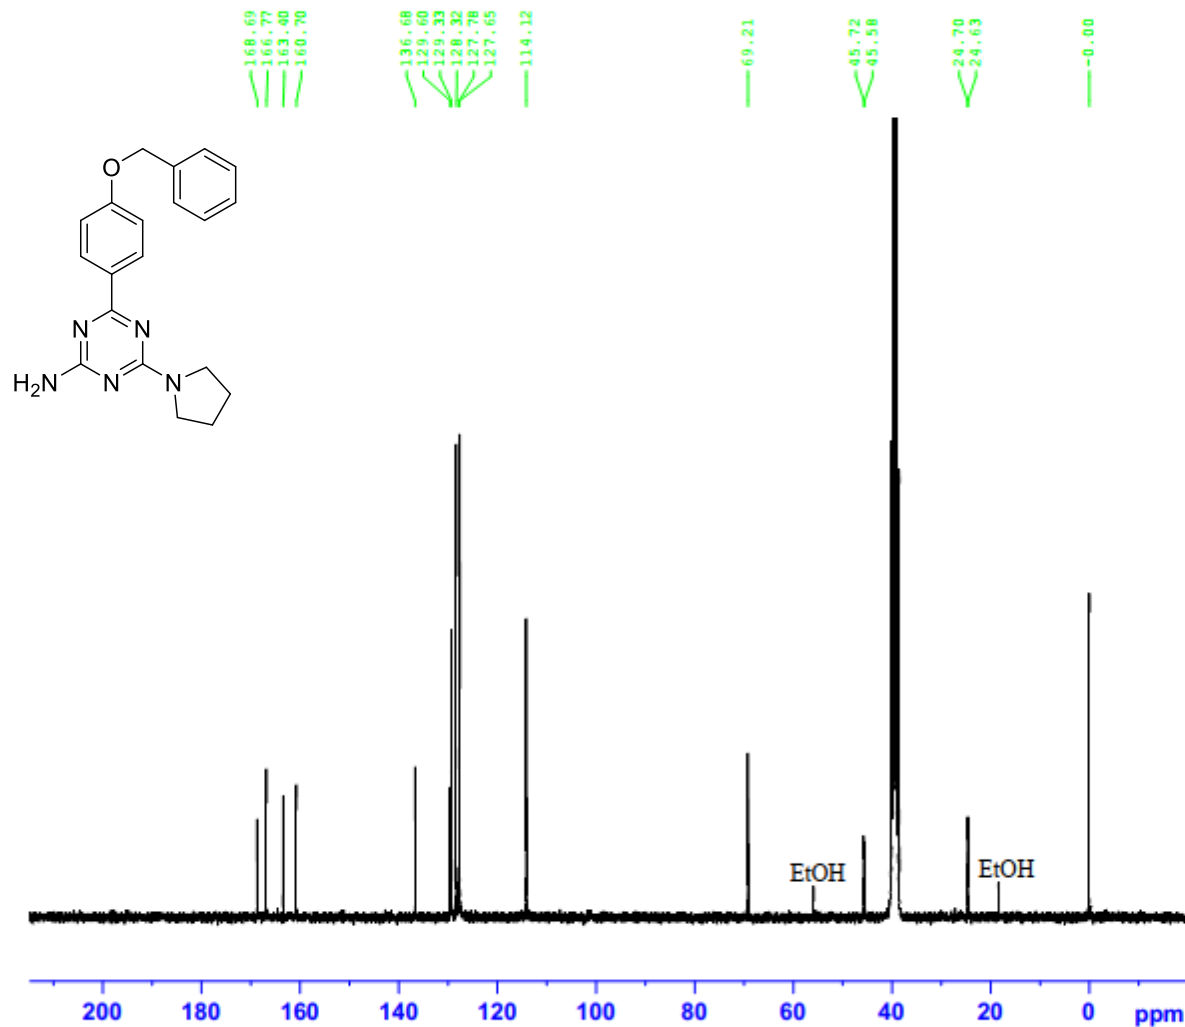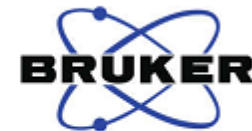

```

Current Data Parameters
NAME      MS241
EXPNO     3
PROCNO    1

F2 - Acquisition Parameters
Date_     20191107
Time      18.05
INSTRUM   FOURIER300
PROBHD    5 mm DUL 13C-1
PULPROG   zgpg30
TD         65536
SOLVENT   DMSO
NS         12288
DS         4
SWH        24414.063 Hz
FIDRES     0.372529 Hz
AQ         1.3421773 sec
RG         501.187
DM         20.480 usec
DE         6.50 usec
TE         300.1 K
D1         2.0000000 sec
D11        0.0300000 sec
D31        0.0000150 sec
D40        0.00439029 sec
L4         37
L5         53
P32        98.00 usec
TD0        12

----- CHANNEL f1 -----
SFO1      75.4828392 MHz
NUC1       13C
P1         15.00 usec
PLW1      22.00000000 W

----- CHANNEL f2 -----
SFO2      300.1612006 MHz
NUC2       1H
CPDPRG2   waltz16
PCPD2     98.00 usec
PLW2      9.30000019 W
PLW12     0.29359001 W
PLW13     0.20359001 W

F2 - Processing parameters
SI         32768
SF         75.4753367 MHz
WDW        EM
SSB        0
LB         1.00 Hz
GB         0
PC         1.40
    
```

6-(3,4-Dimethoxyphenyl)-4-pyrrolidino-1,3,5-triazine-2-amine (**9**{1,16})

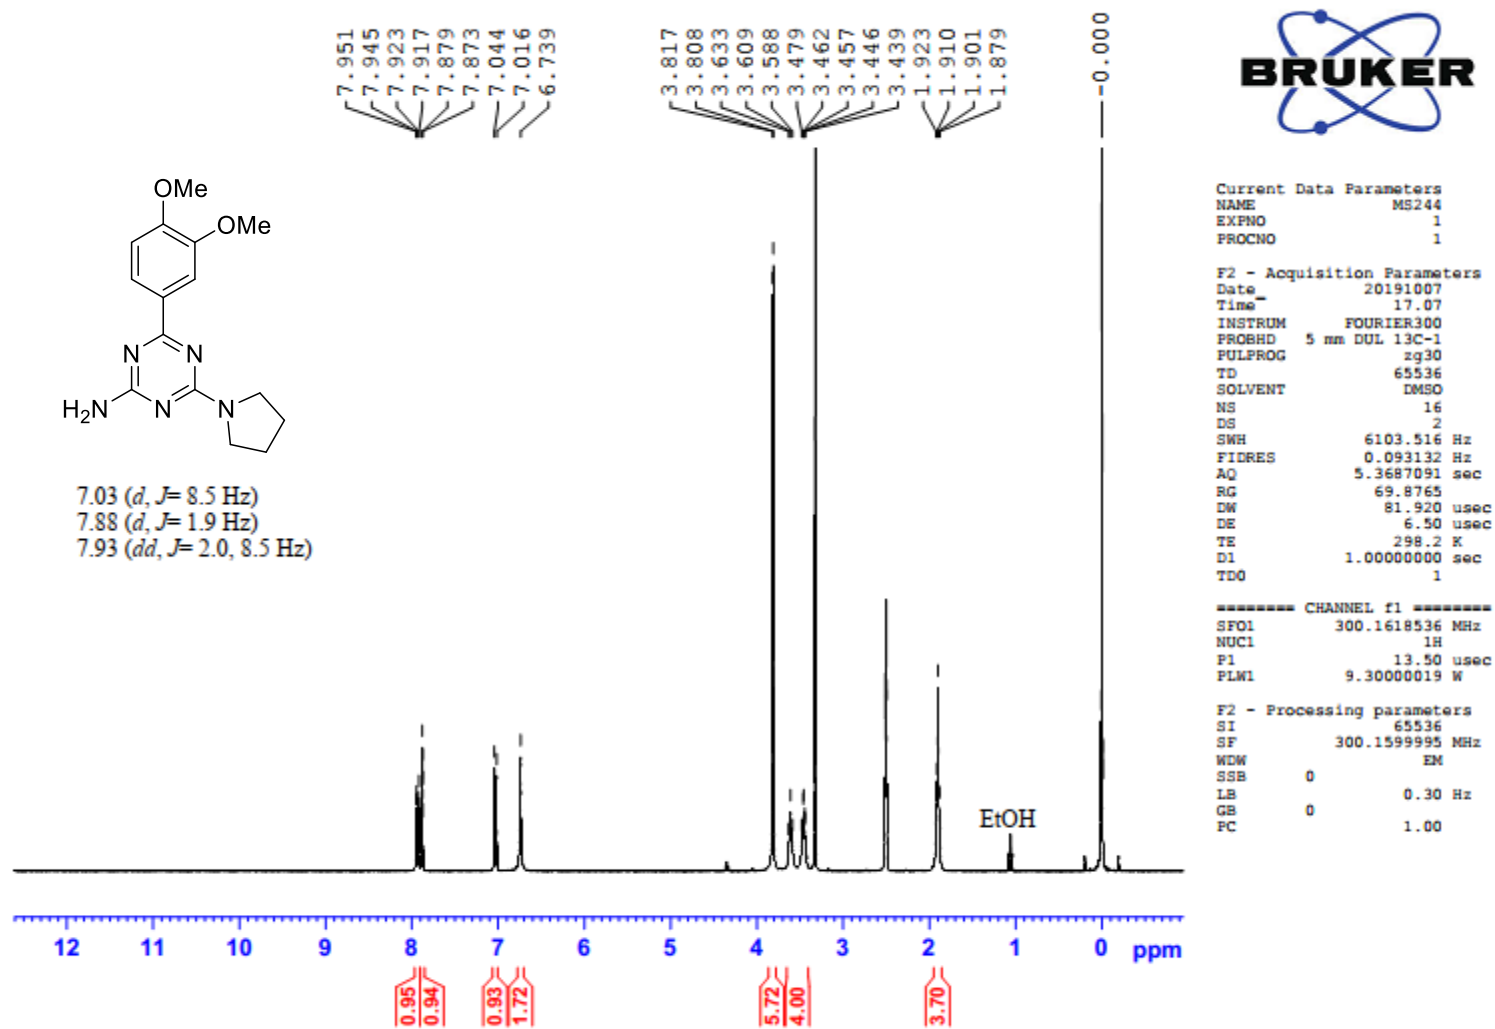

6-(3,4-Dimethoxyphenyl)-4-pyrrolidino-1,3,5-triazine-2-amine (9{1,16})

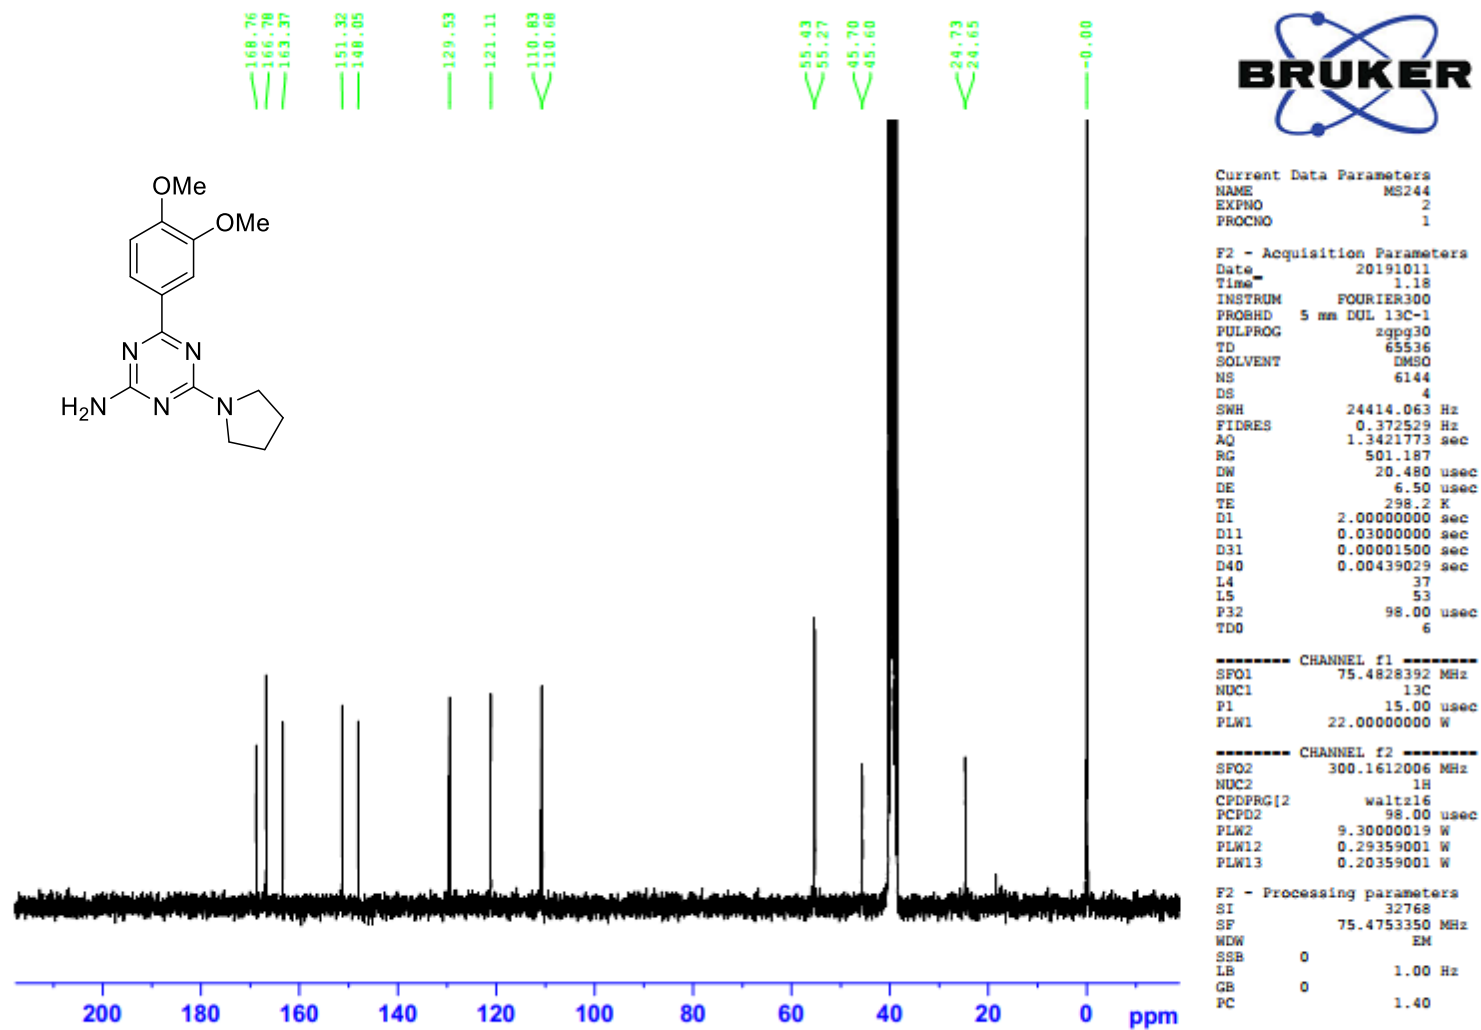

6-(3,4,5-Trimethoxyphenyl)-4-pyrrolidino-1,3,5-triazine-2-amine (9{1,17})

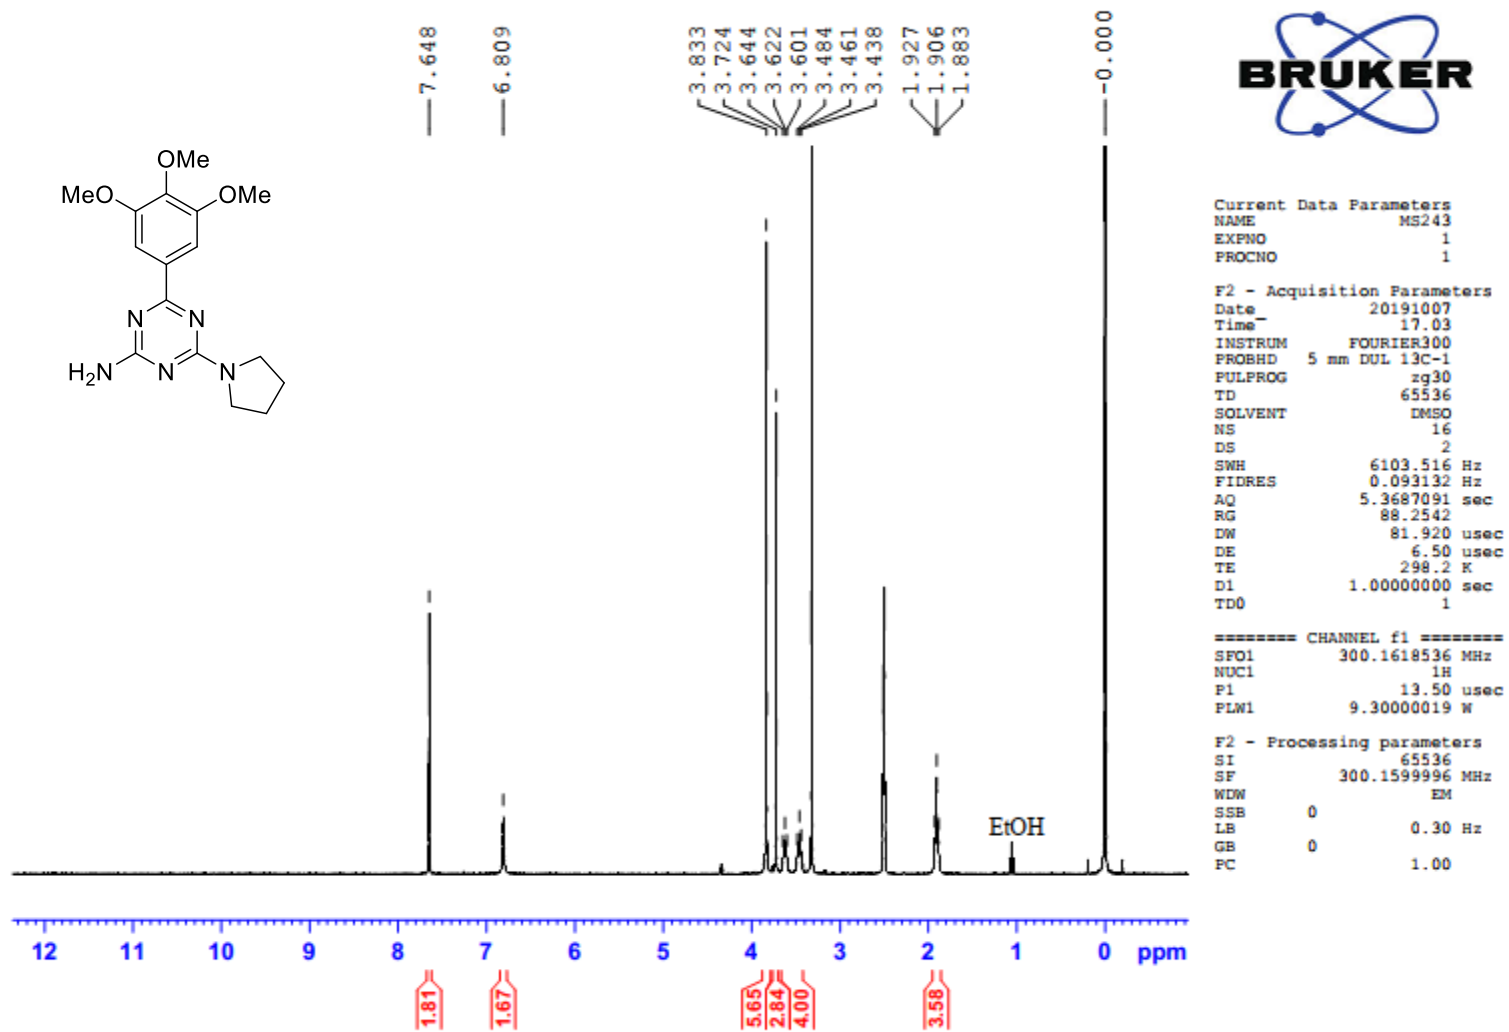



6-(3,4,5-Trimethoxyphenyl)-4-pyrrolidino-1,3,5-triazine-2-amine (**9**{1,17})

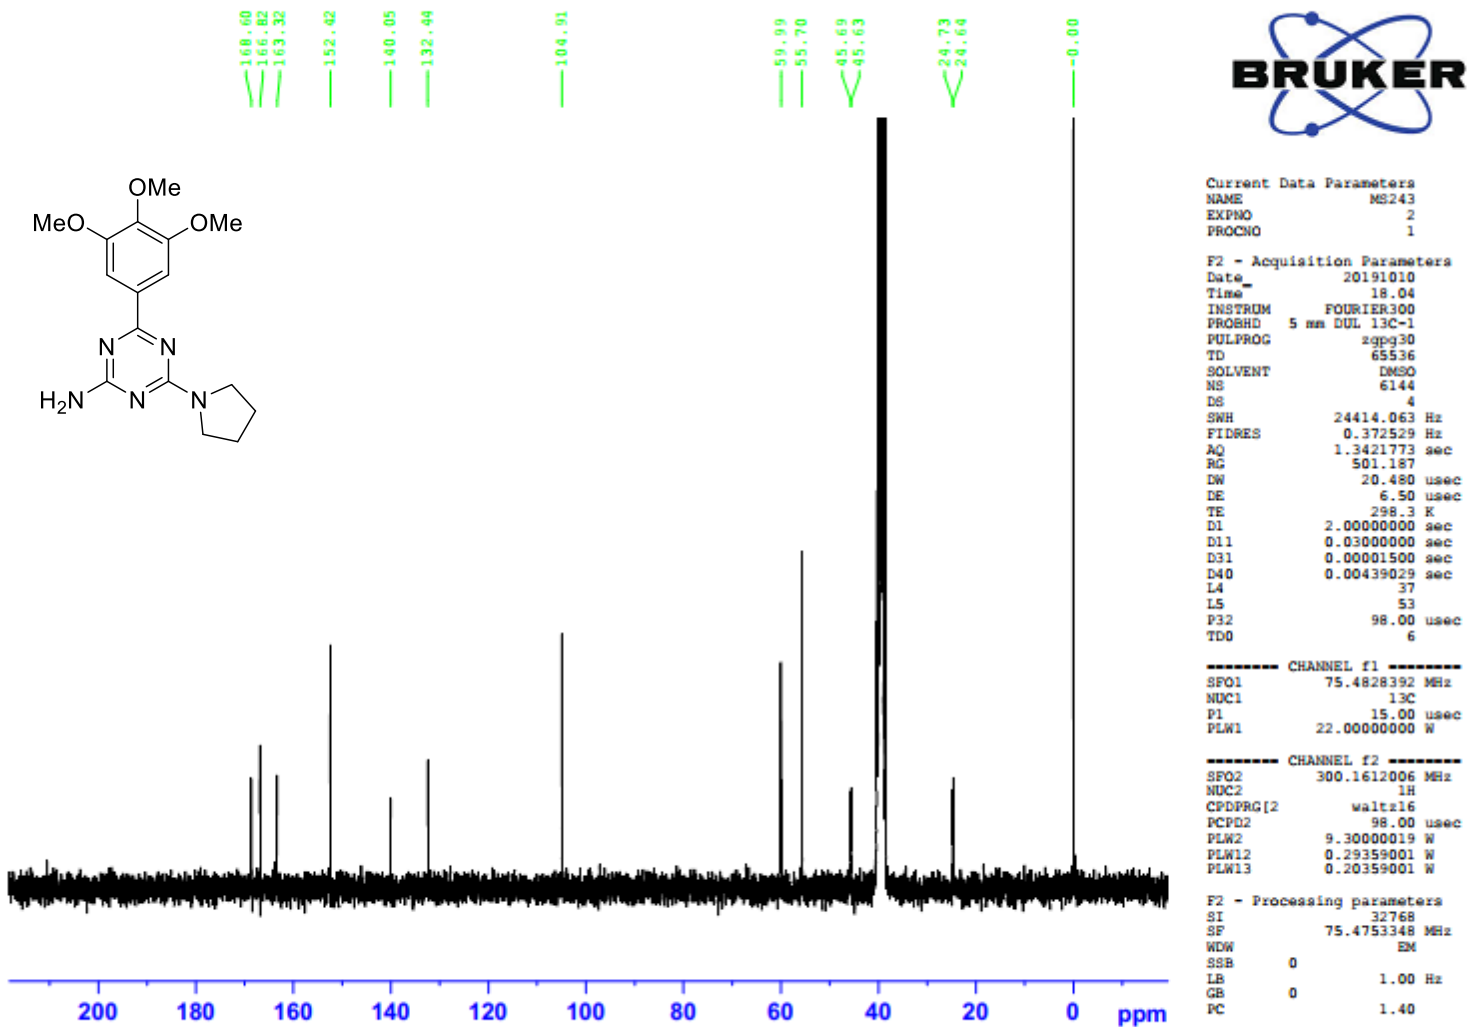

4-Pyrrolidino-6-(2-thienyl)-1,3,5-triazine-2-amine (**9**{1,18})

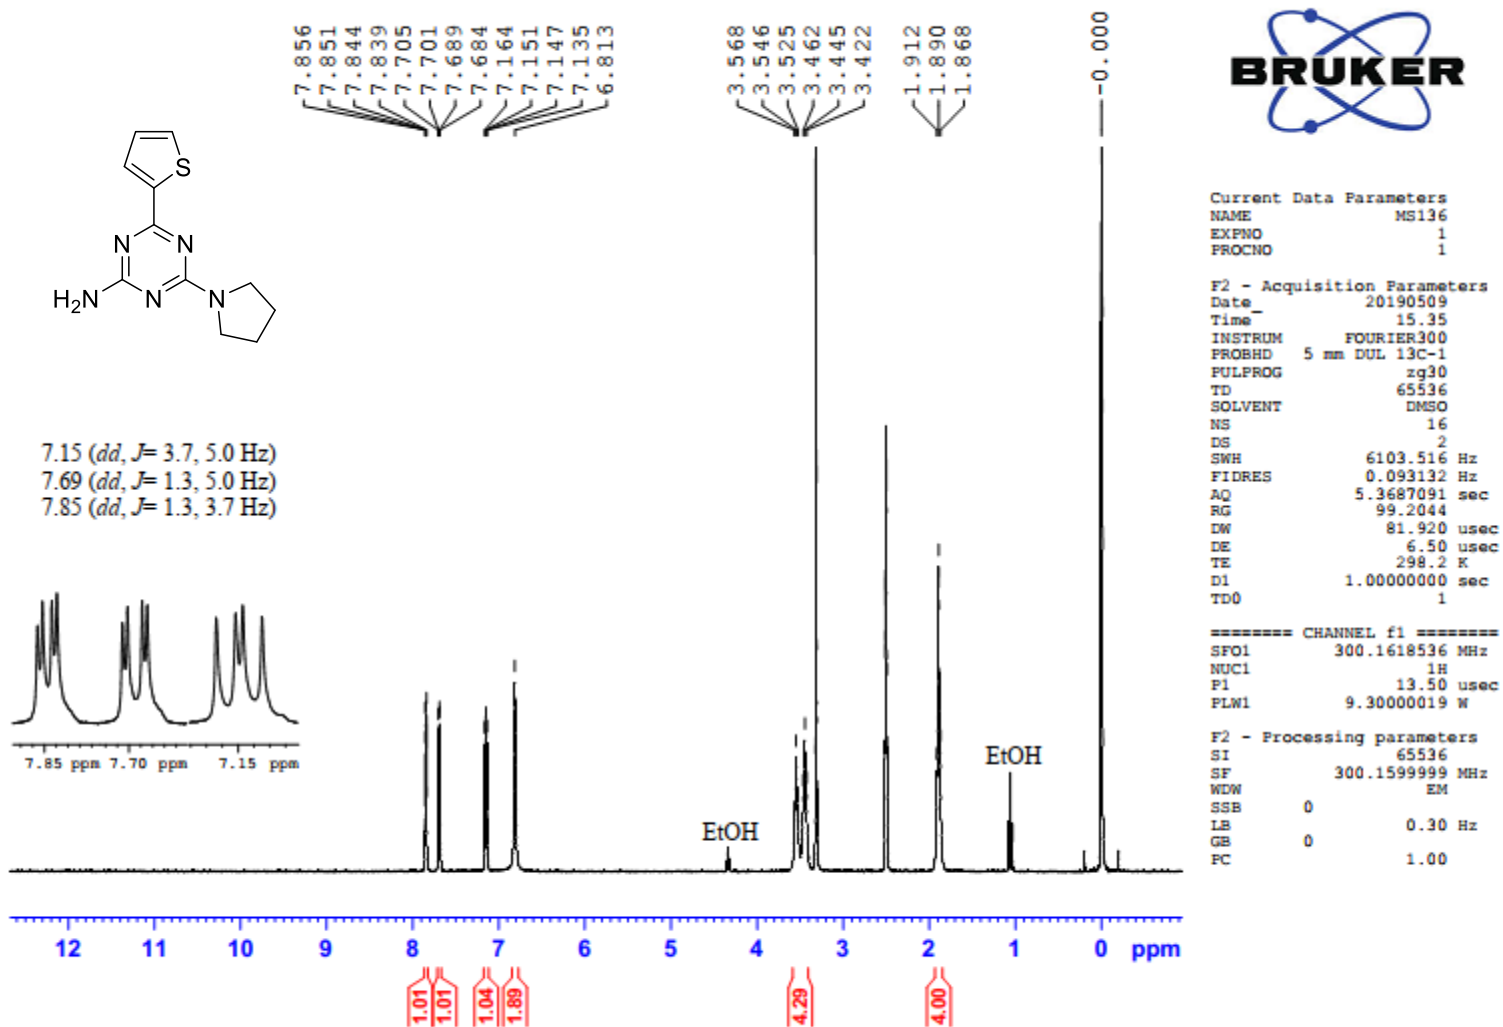

4-Pyrrolidino-6-(2-thienyl)-1,3,5-triazine-2-amine (9{1,18})

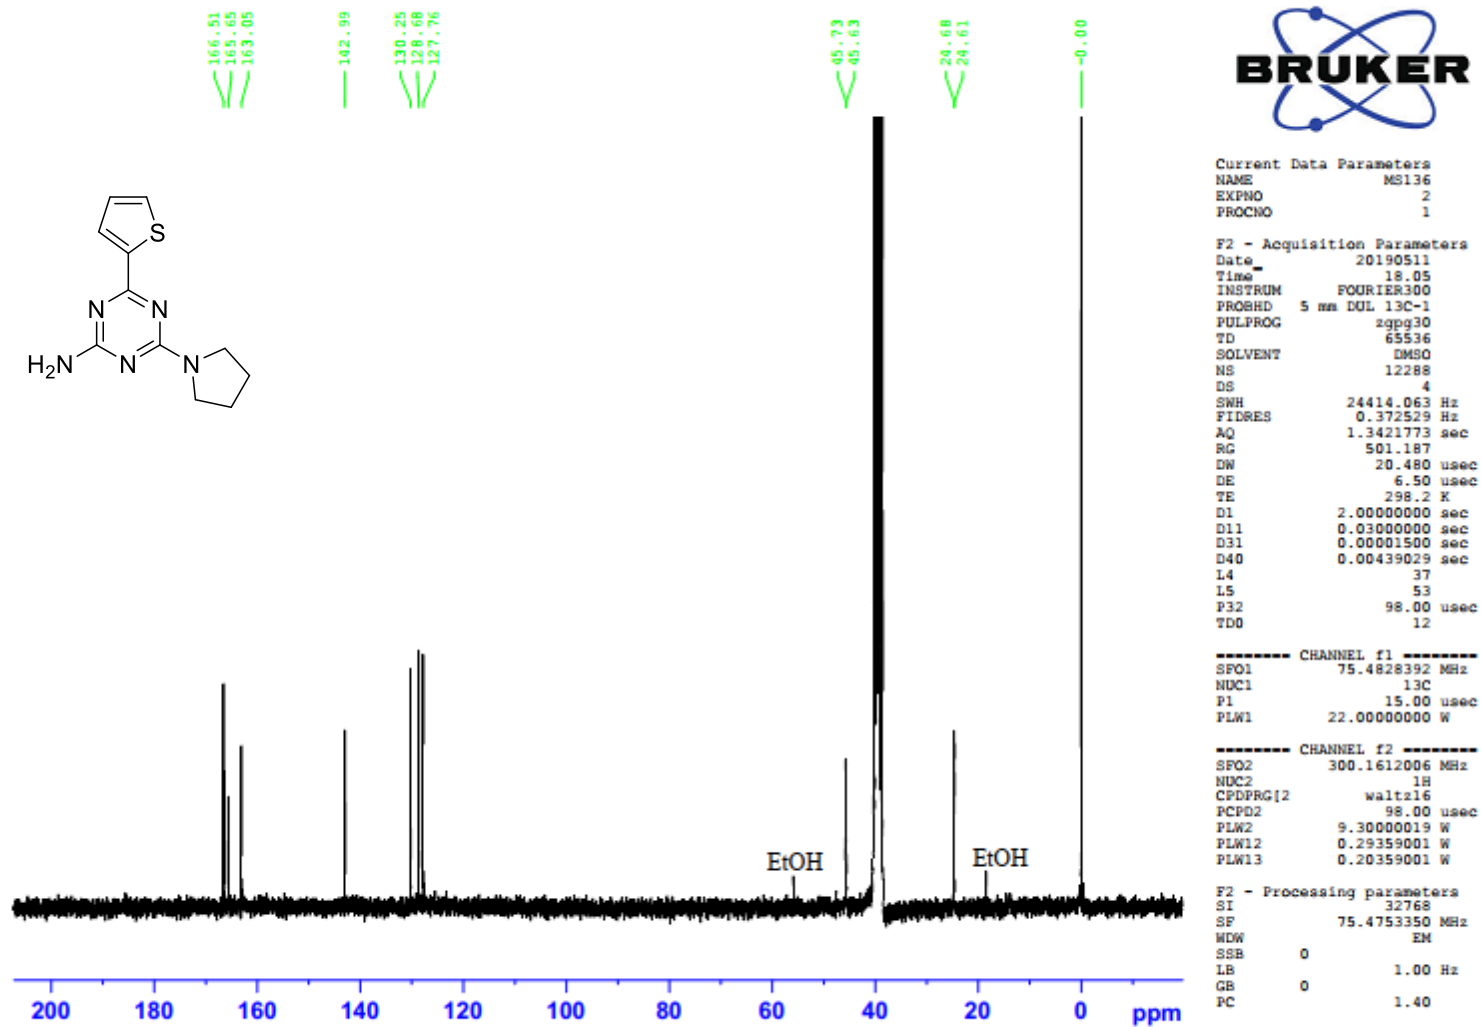

6-(3-Fluorophenyl)-4-piperidino-1,3,5-triazine-2-amine (9{2,2})

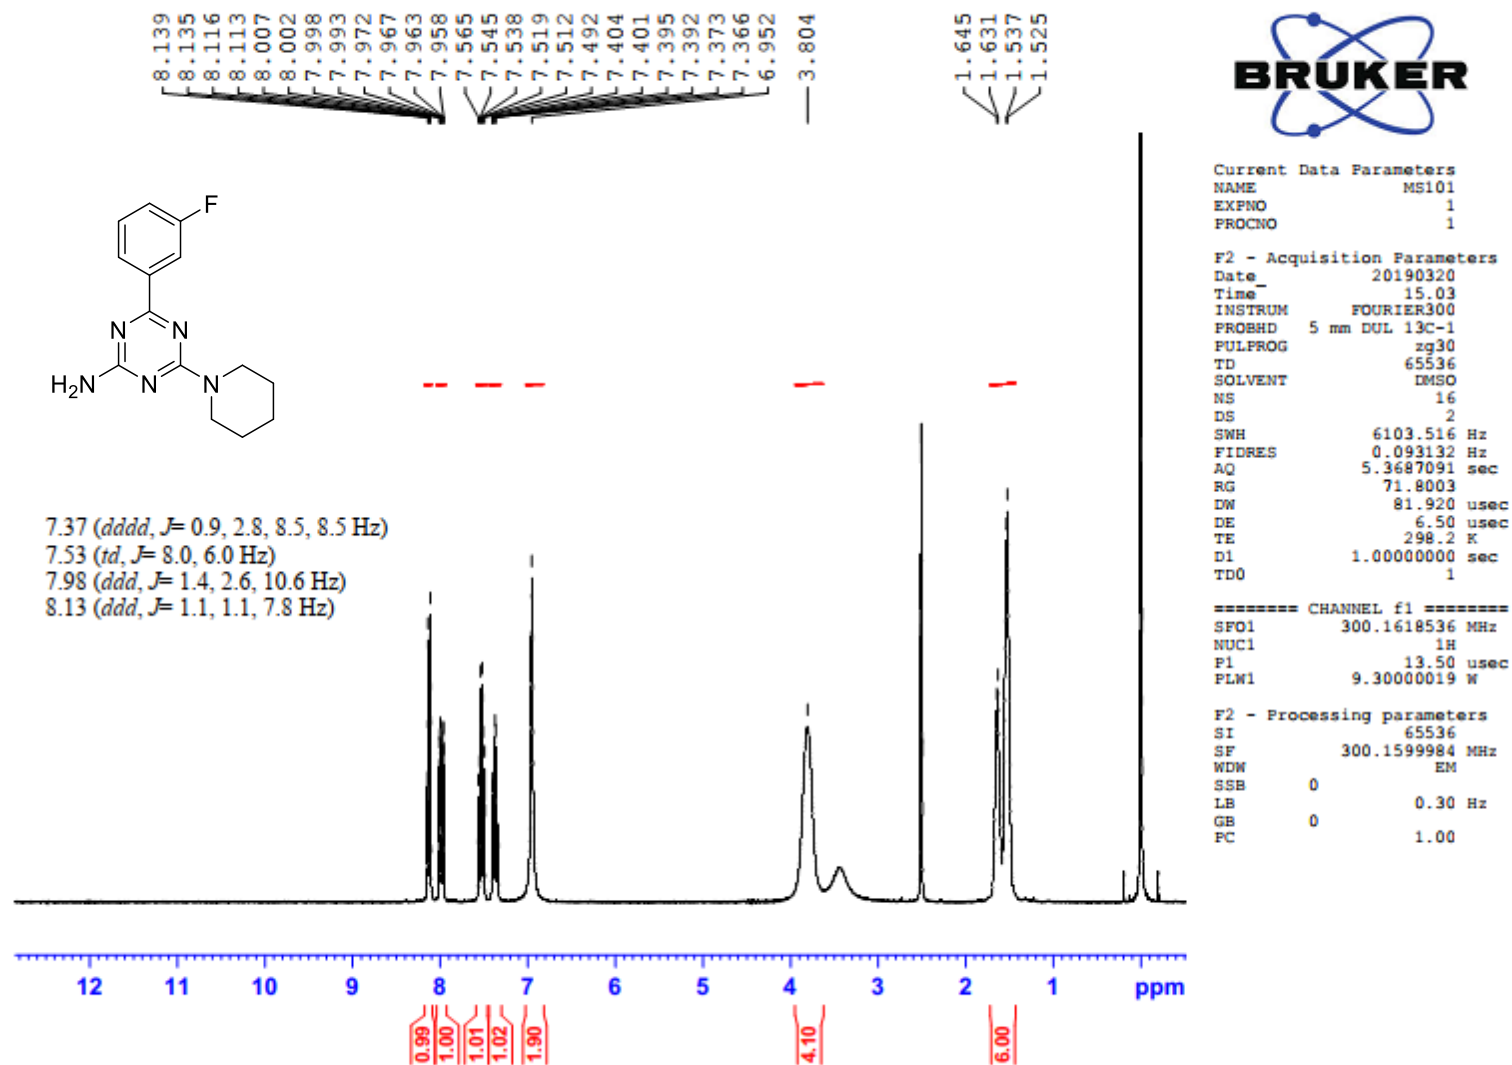

6-(3-Fluorophenyl)-4-piperidino-1,3,5-triazine-2-amine (9{2,2})

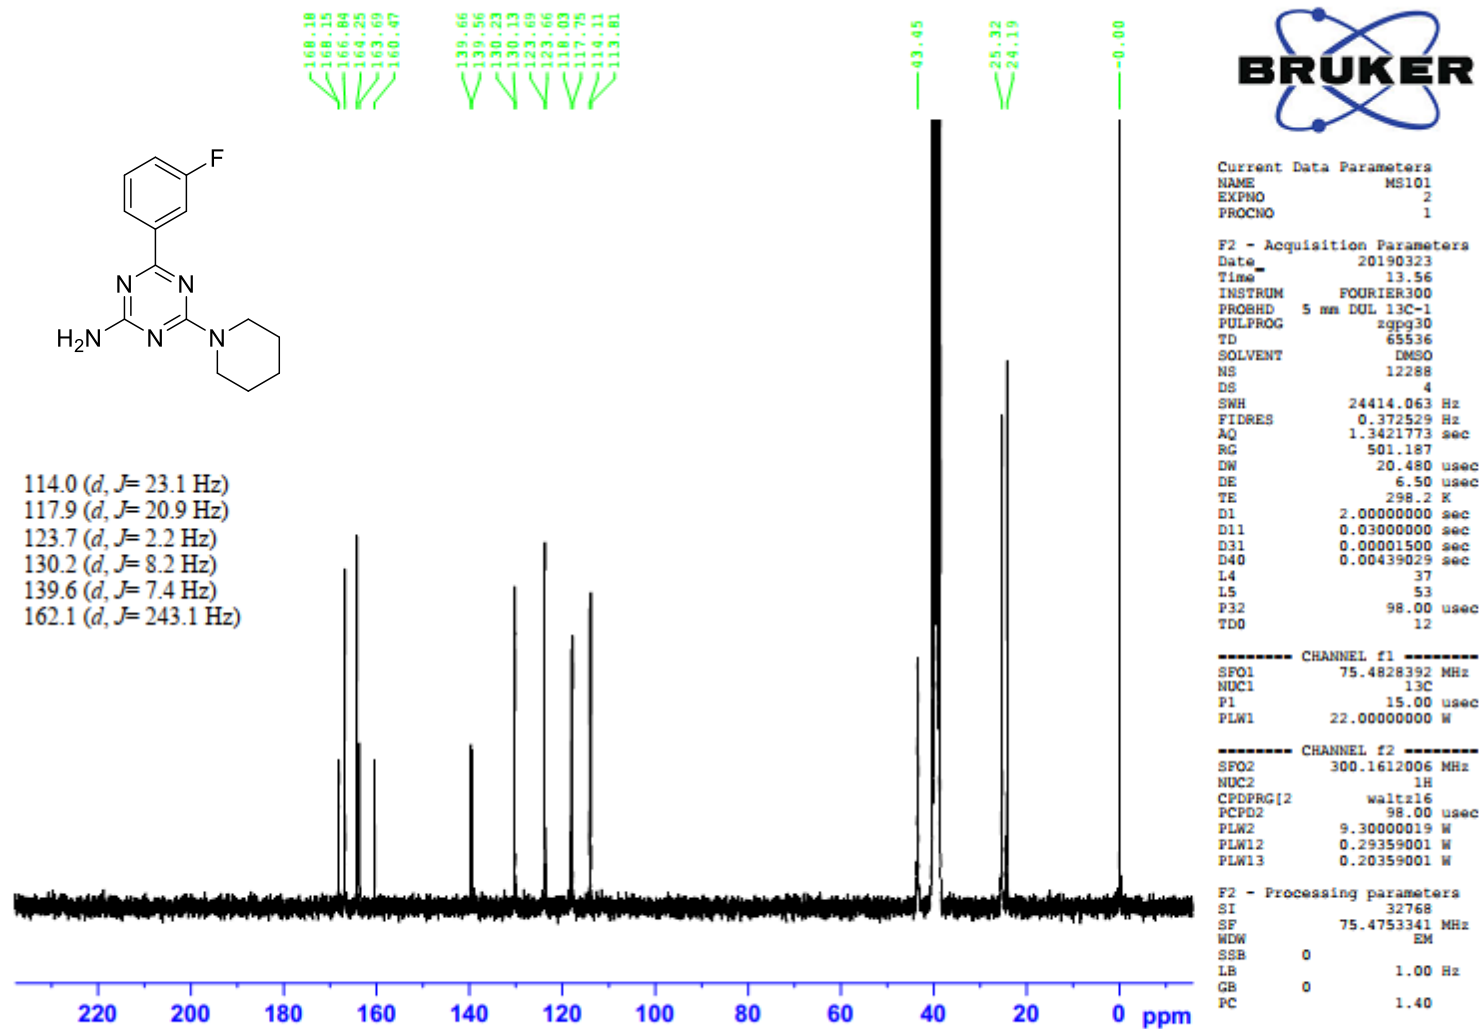

6-(4-Fluorophenyl)-4-piperidino-1,3,5-triazine-2-amine (9{2,3})

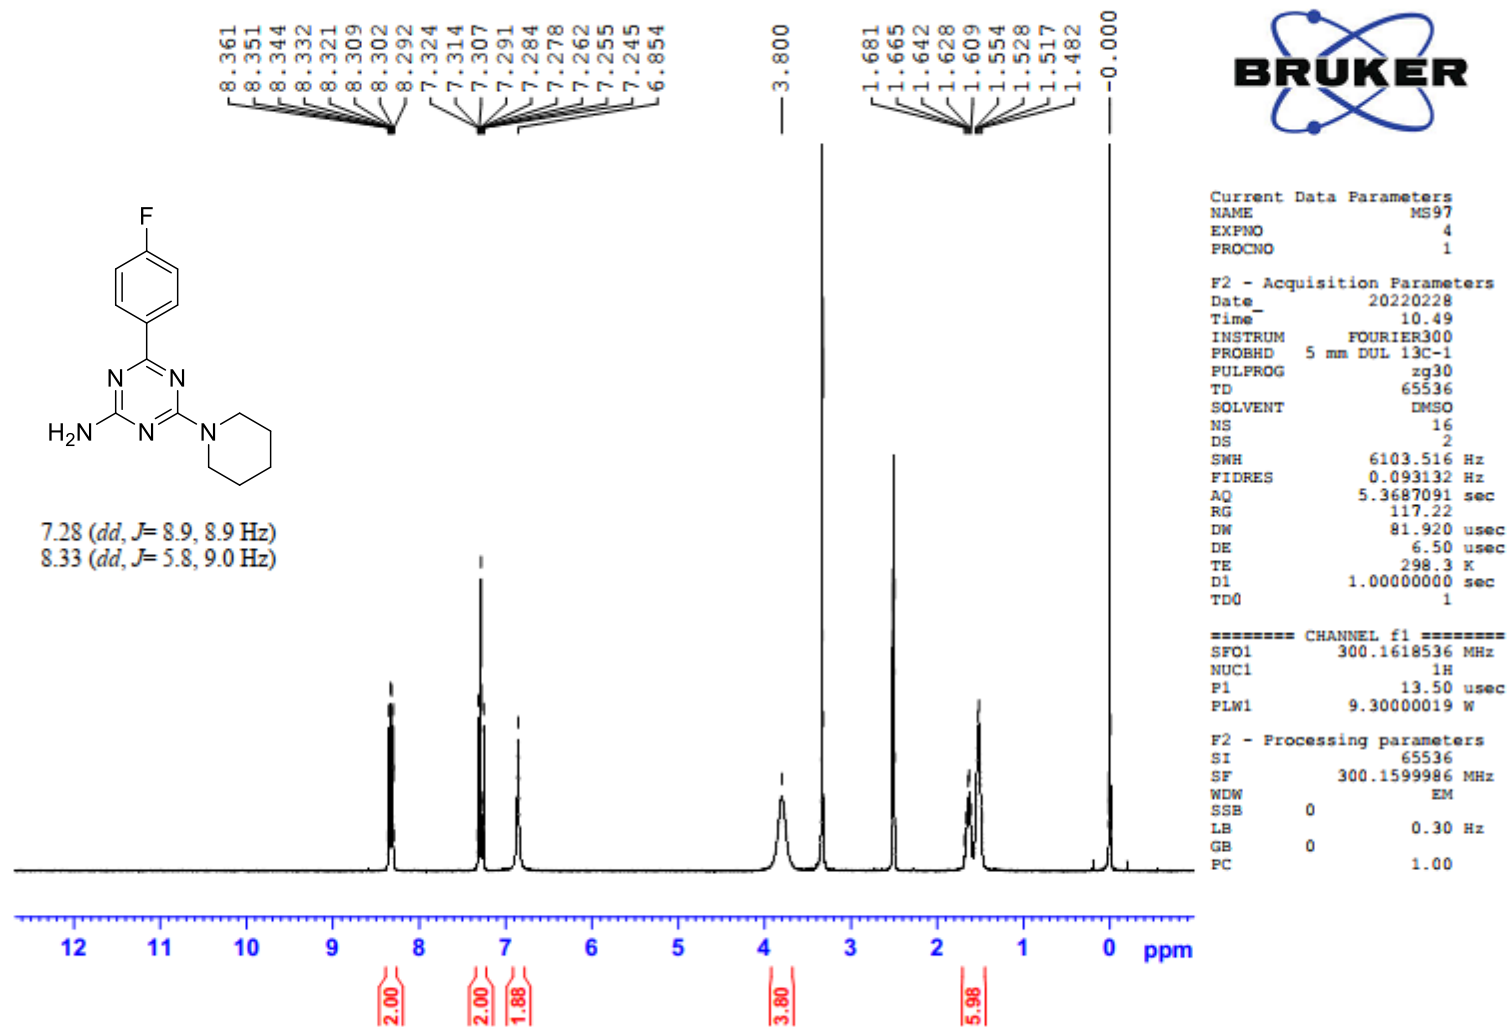

6-(4-Fluorophenyl)-4-piperidino-1,3,5-triazine-2-amine (**9**{2,3})

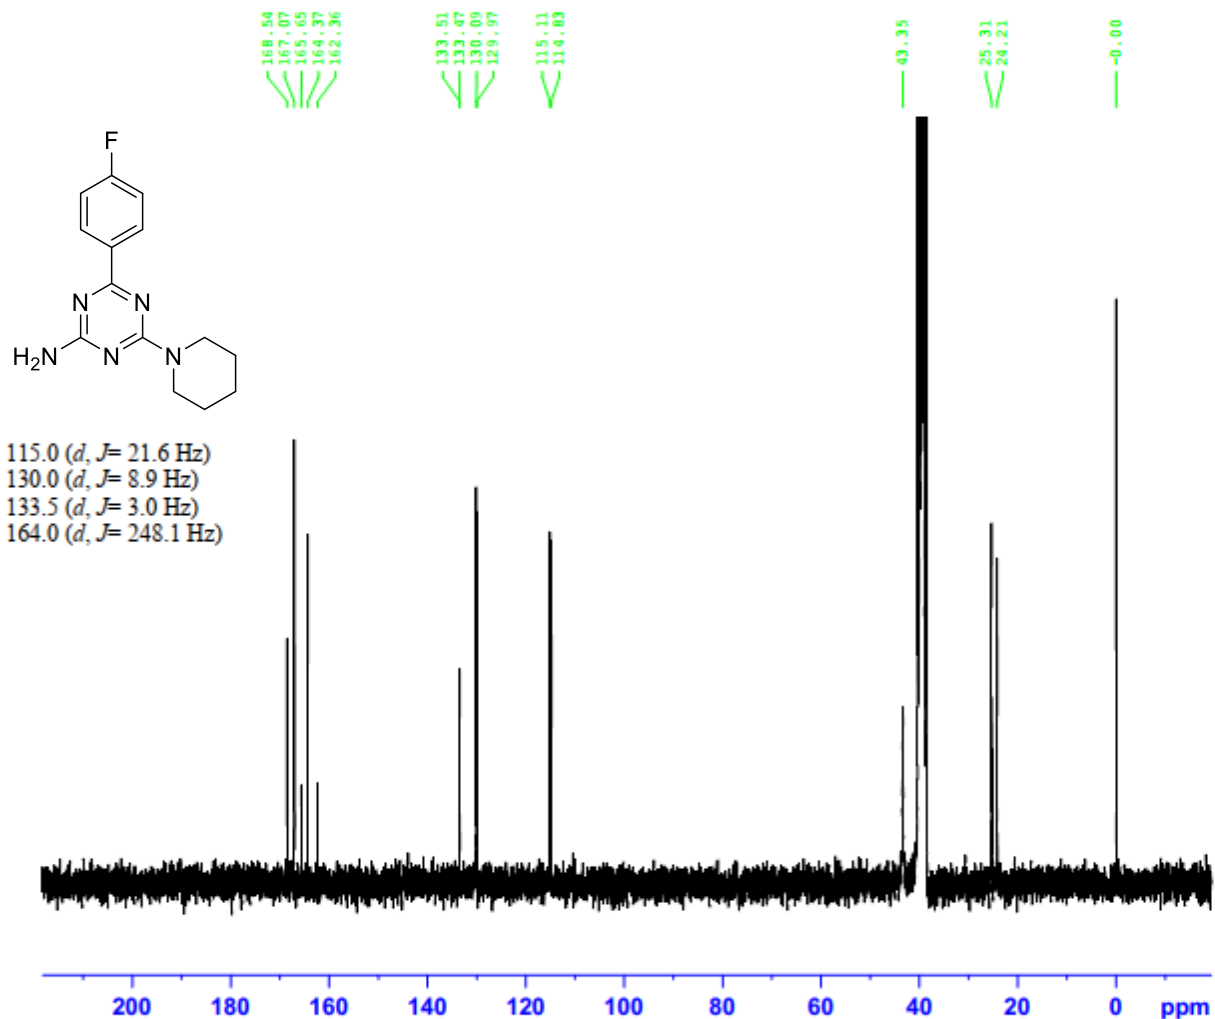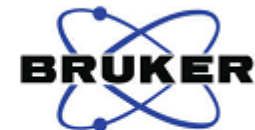

```

Current Data Parameters
NAME          MS97
EXPNO         5
PROCNO        1

F2 - Acquisition Parameters
Date_         20220302
Time          18.05
INSTRUM       FOURIER300
PROBHD        5 mm DOL 13C-1
PULPROG       zgpg30
TD            65536
SOLVENT       DMSO
NS            12288
DS            4
SWH           24414.063 Hz
FIDRES        0.372529 Hz
AQ            1.3421773 sec
RG            501.187
DW            20.480 usec
DE            6.50 usec
TE            298.2 K
D1            2.0000000 sec
D11           0.0300000 sec
D31           0.0000130 sec
D40           0.02898005 sec
L4            40
L5            57
P32           90.00 usec
TDO           12

----- CHANNEL f1 -----
SFO1          75.4828392 MHz
NUC1           13C
P1            13.00 usec
PLW1          22.00000000 W

----- CHANNEL f2 -----
SFO2          300.1612006 MHz
NUC2            1H
CPOPRG[2]     waltz16
PCPD2         90.00 usec
PLW2          9.30000019 W
PLW12         0.25149000 W
PLW13         0.12650000 W

F2 - Processing parameters
SI            32768
SF            75.4753350 MHz
WDW           EM
SSB           0
LB            1.00 Hz
GB            0
PC            1.40
    
```

6-(4-Chlorophenyl)-4-piperidino-1,3,5-triazine-2-amine (9{2,4})

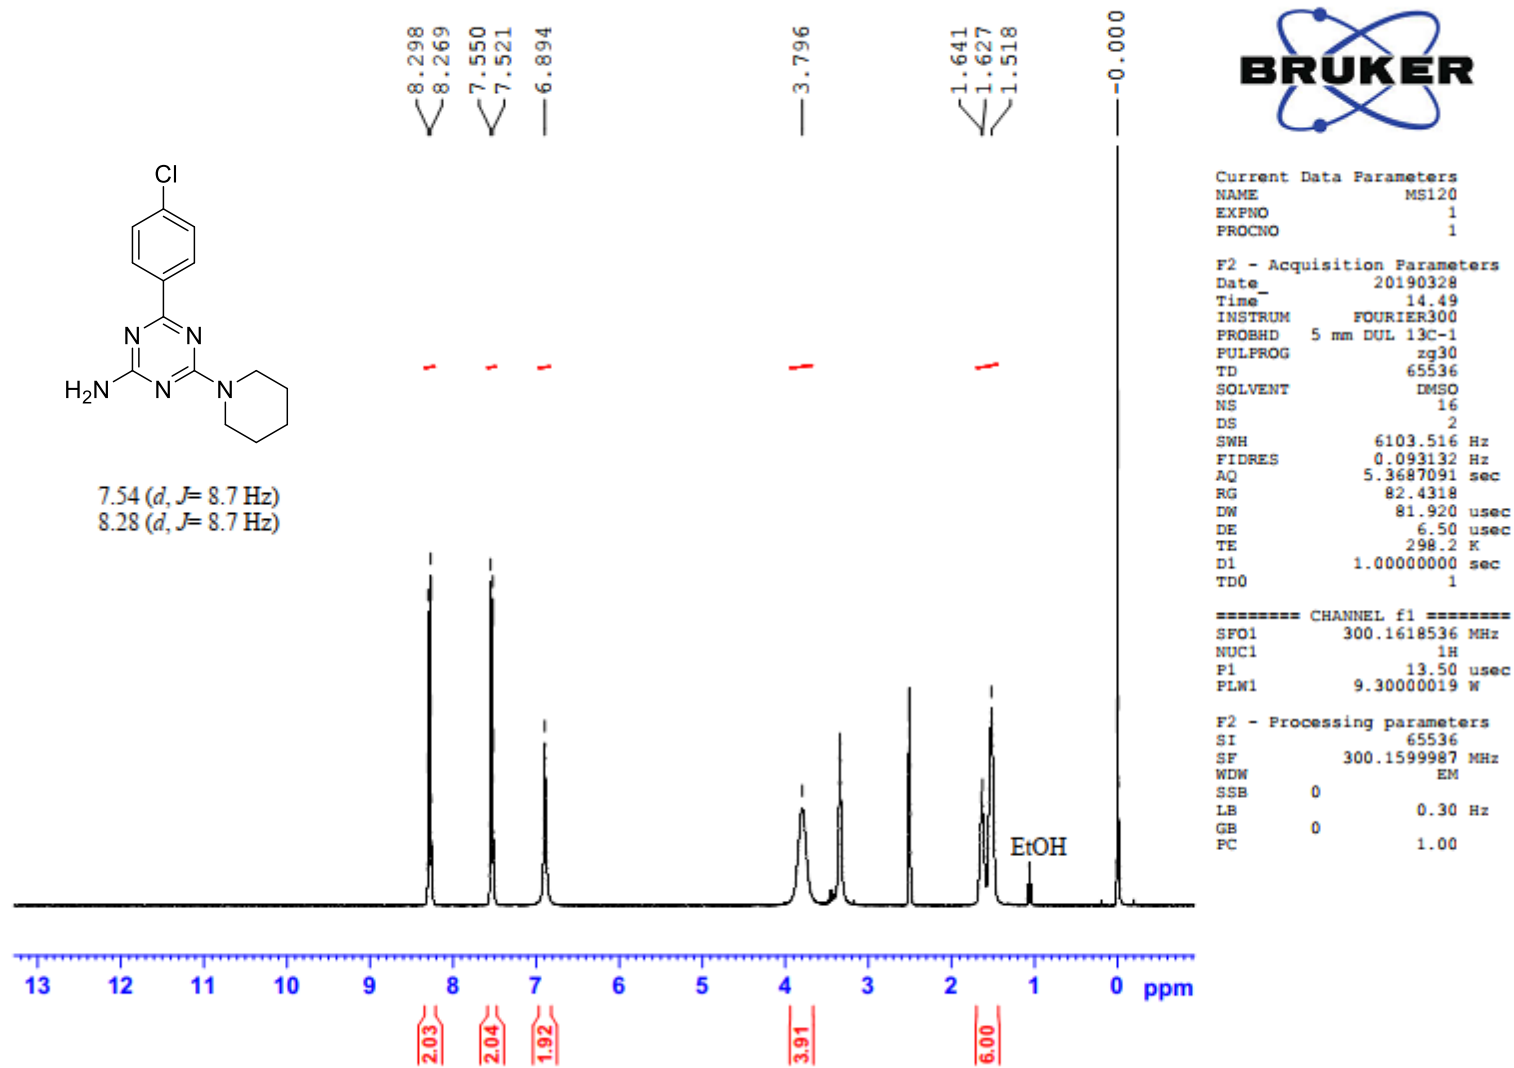



6-(4-Chlorophenyl)-4-piperidino-1,3,5-triazine-2-amine (9{2,4})

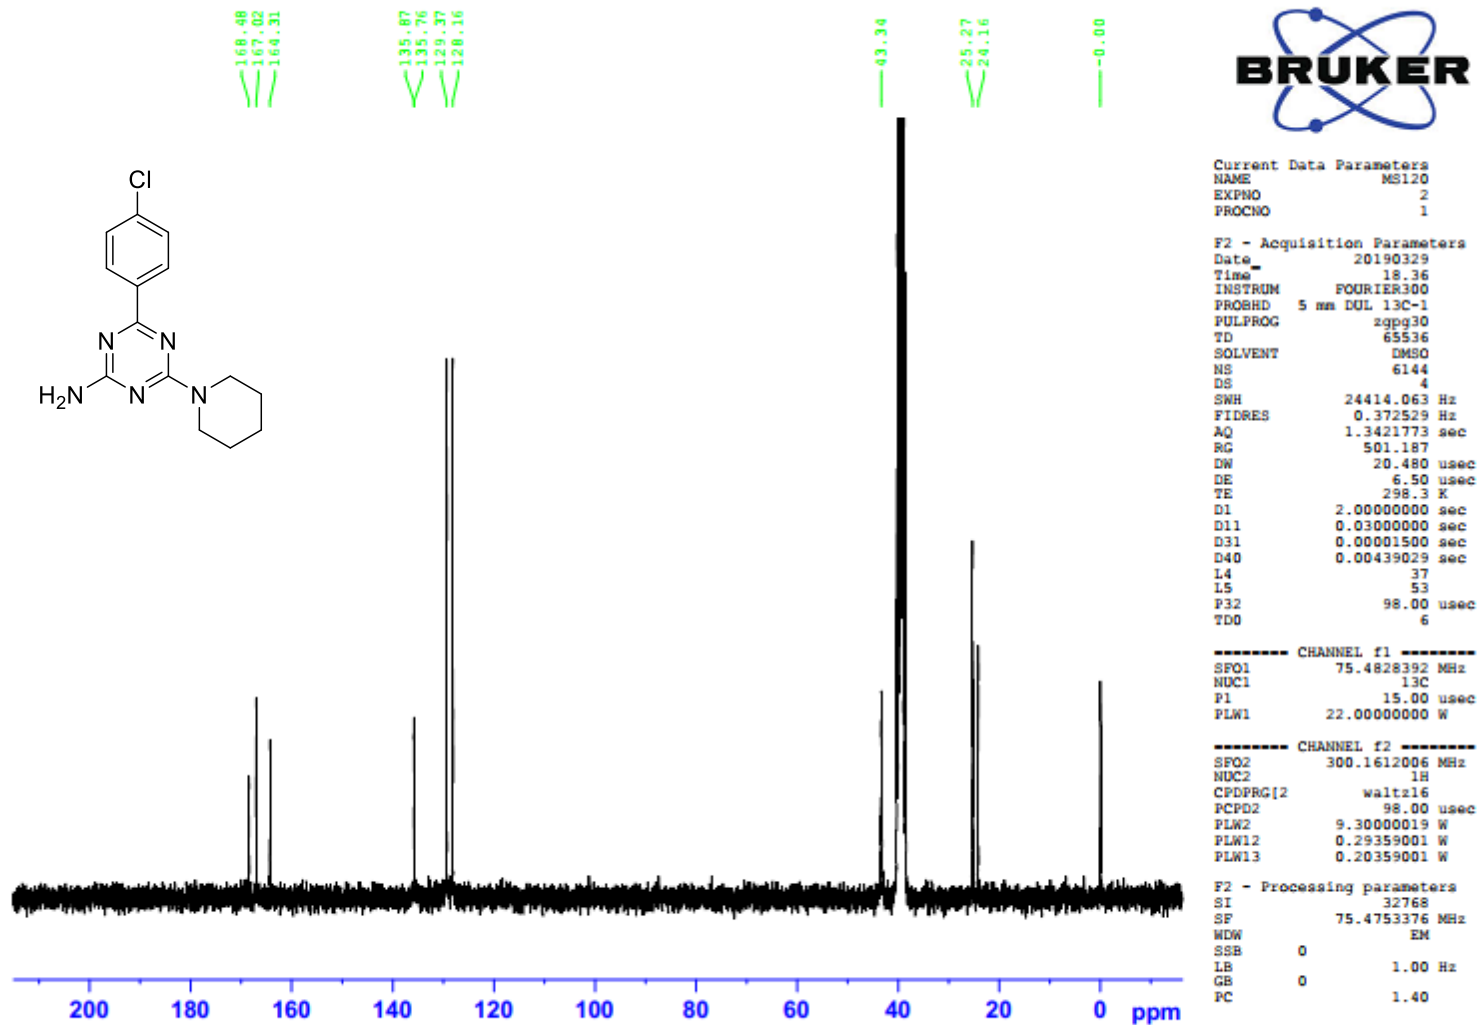

6-(4-Methylphenyl)-4-piperidino-1,3,5-triazine-2-amine (9{2,6})

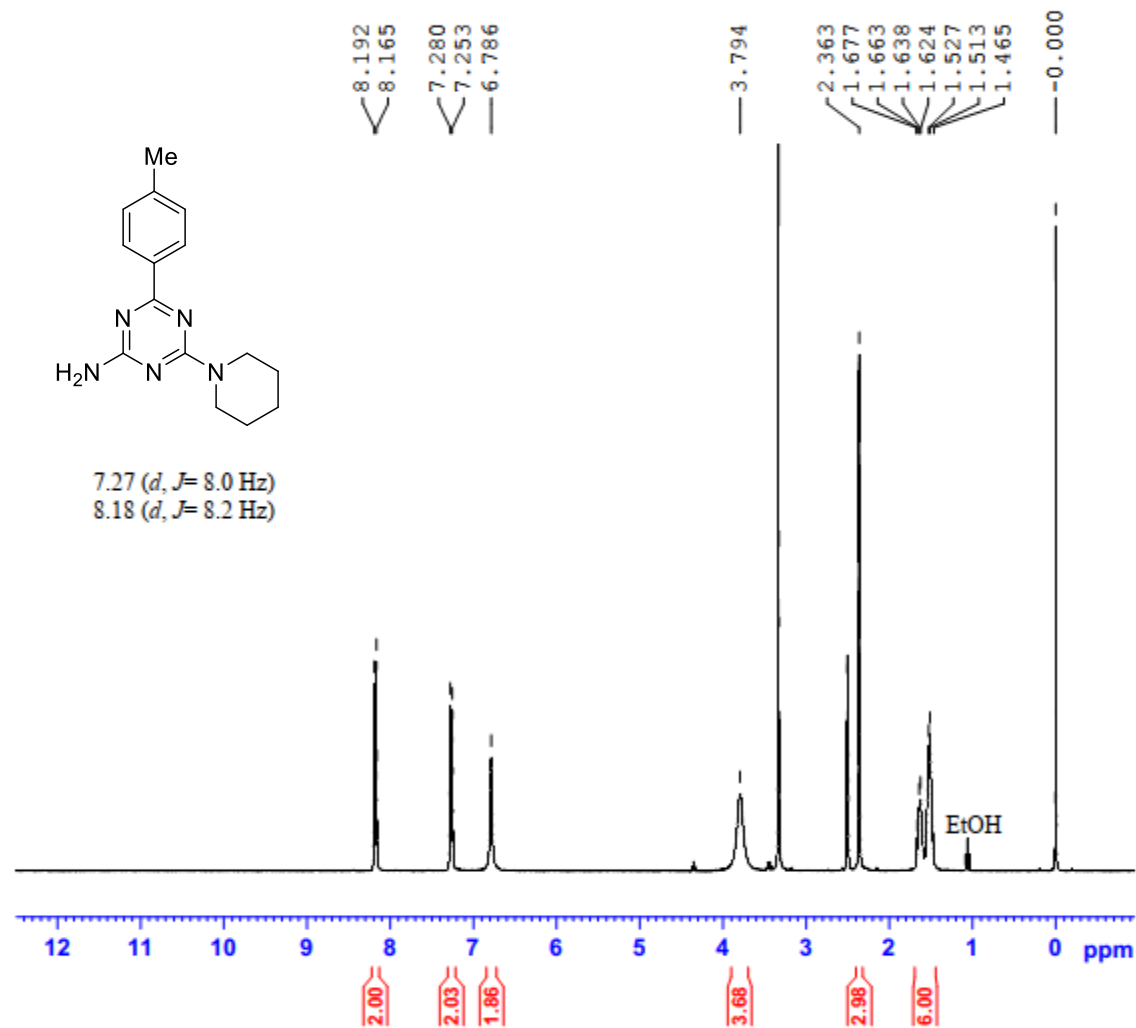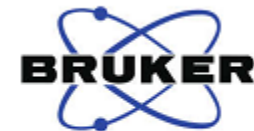

Current Data Parameters  
 NAME MS95a  
 EXPNO 1  
 PROCNO 1

F2 - Acquisition Parameters  
 Date 20190318  
 Time 15.08  
 INSTRUM FOURIER300  
 PROBHD 5 mm DUL 13C-1  
 PULPROG zg30  
 TD 65536  
 SOLVENT DMSO  
 NS 16  
 DS 2  
 SWH 6103.516 Hz  
 FIDRES 0.093132 Hz  
 AQ 5.3687091 sec  
 RG 79.6767  
 DW 81.920 usec  
 DE 6.50 usec  
 TE 298.2 K  
 D1 1.0000000 sec  
 TD0 1

===== CHANNEL f1 =====  
 SFO1 300.1618536 MHz  
 NUC1 1H  
 P1 13.50 usec  
 PLM1 9.30000019 W

F2 - Processing parameters  
 SI 65536  
 SF 300.1599998 MHz  
 WDW EM  
 SSB 0  
 LB 0.30 Hz  
 GB 0  
 PC 1.00

6-(4-Methylphenyl)-4-piperidino-1,3,5-triazine-2-amine (9{2,6})

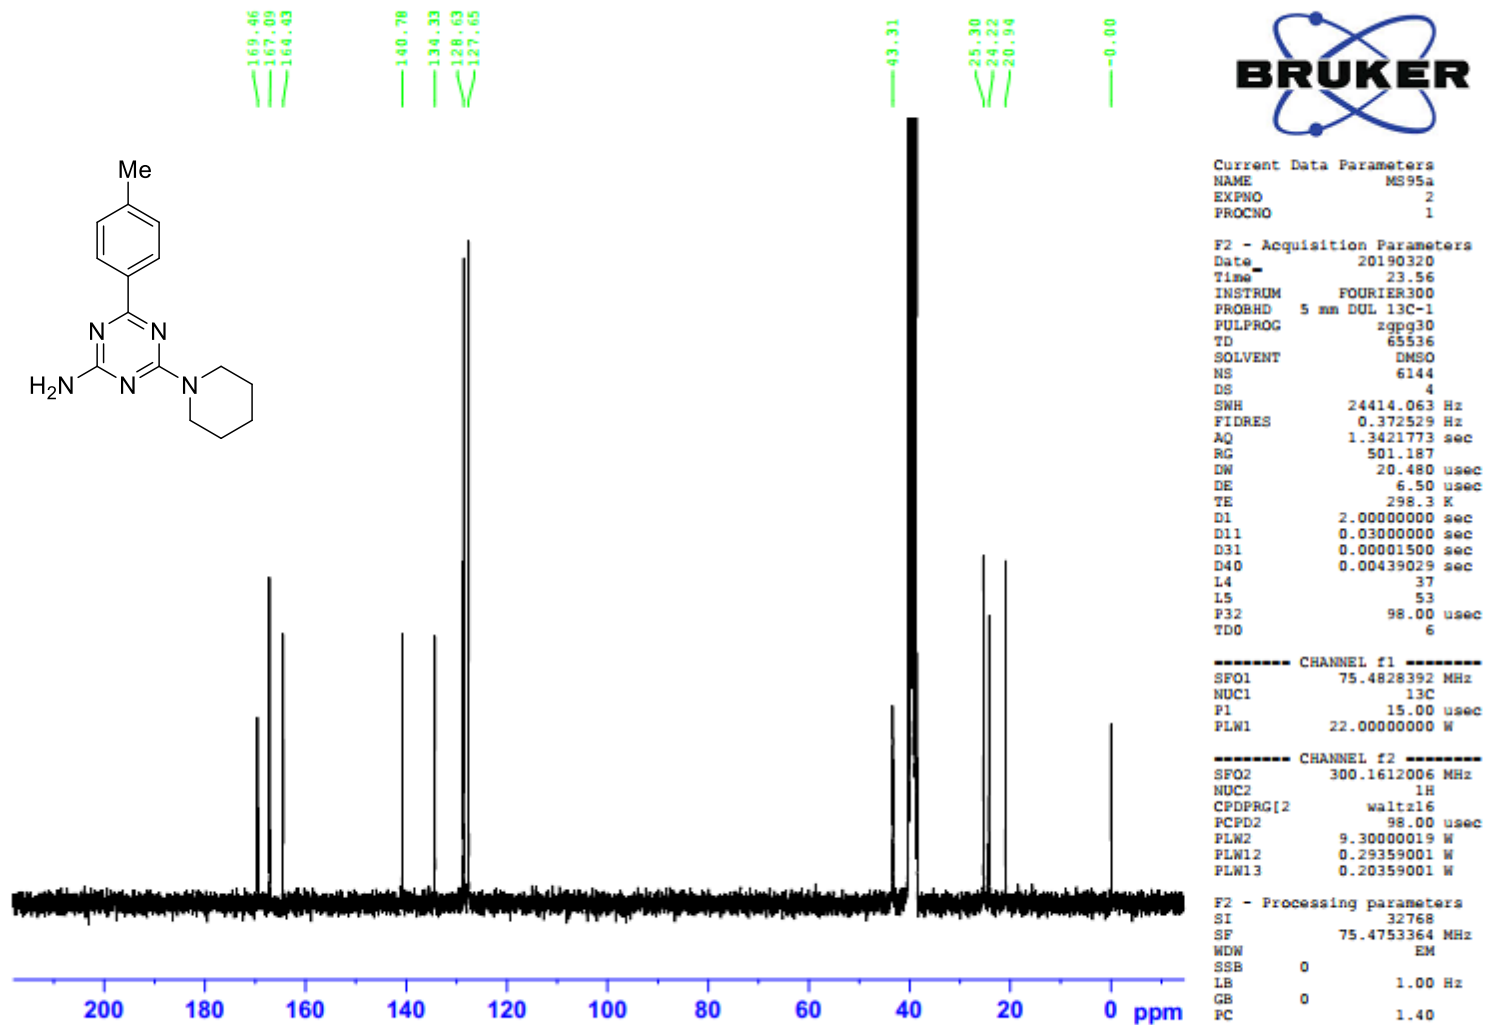

6-(4-Methoxyphenyl)-4-piperidino-1,3,5-triazine-2-amine (9{2,9})

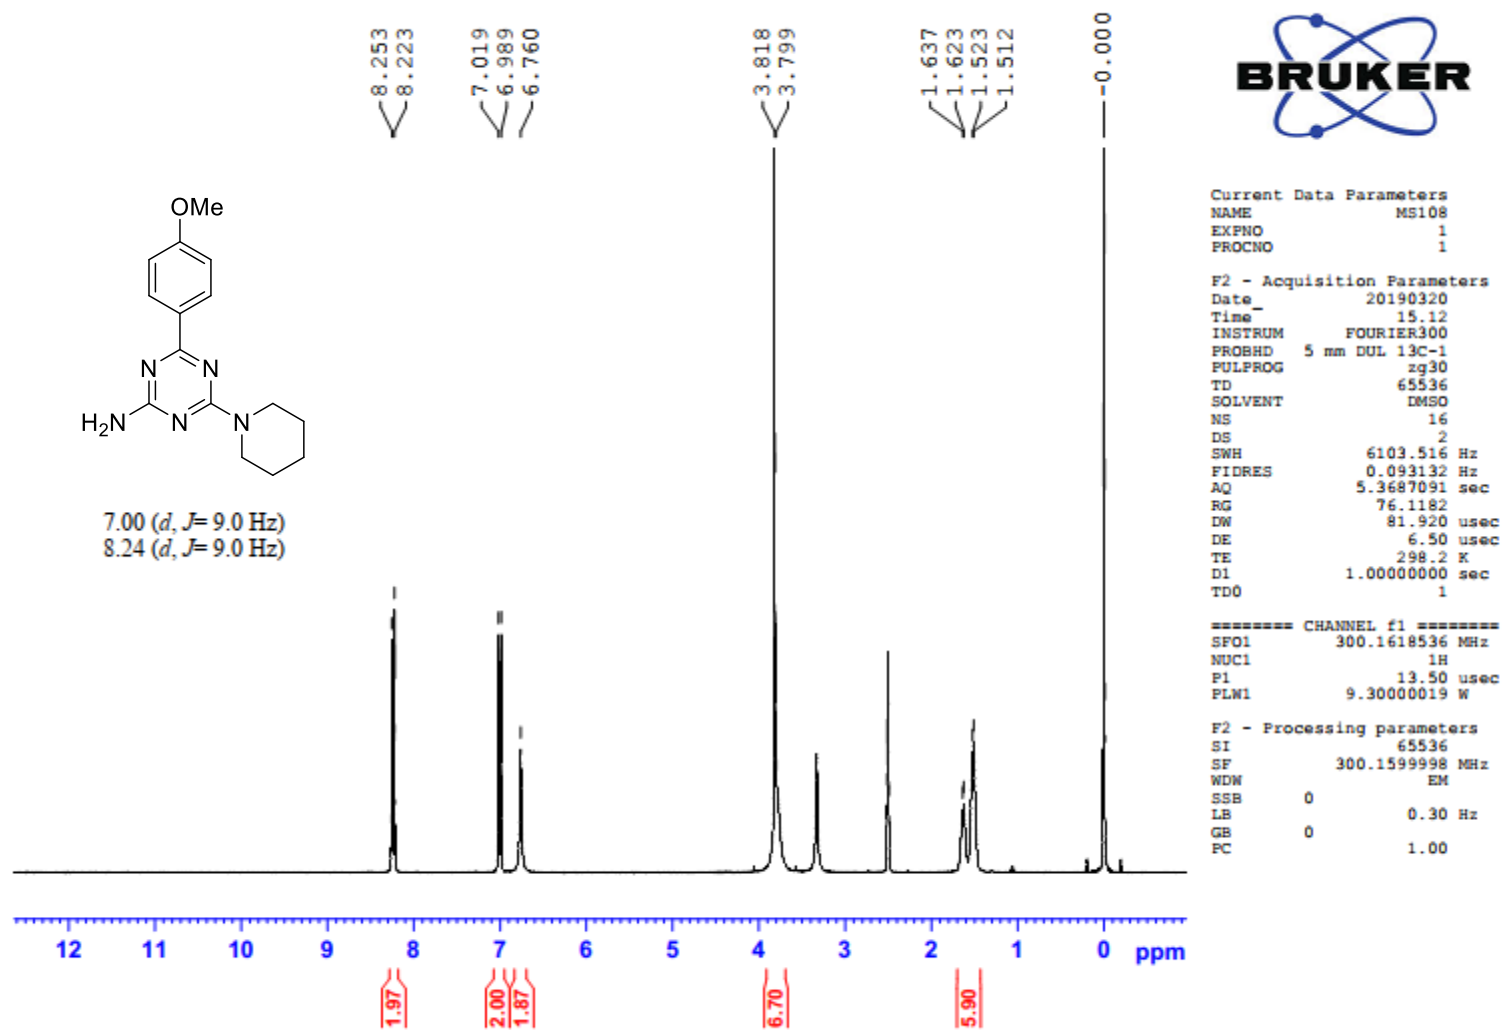

6-(4-Methoxyphenyl)-4-piperidino-1,3,5-triazine-2-amine (9{2,9})

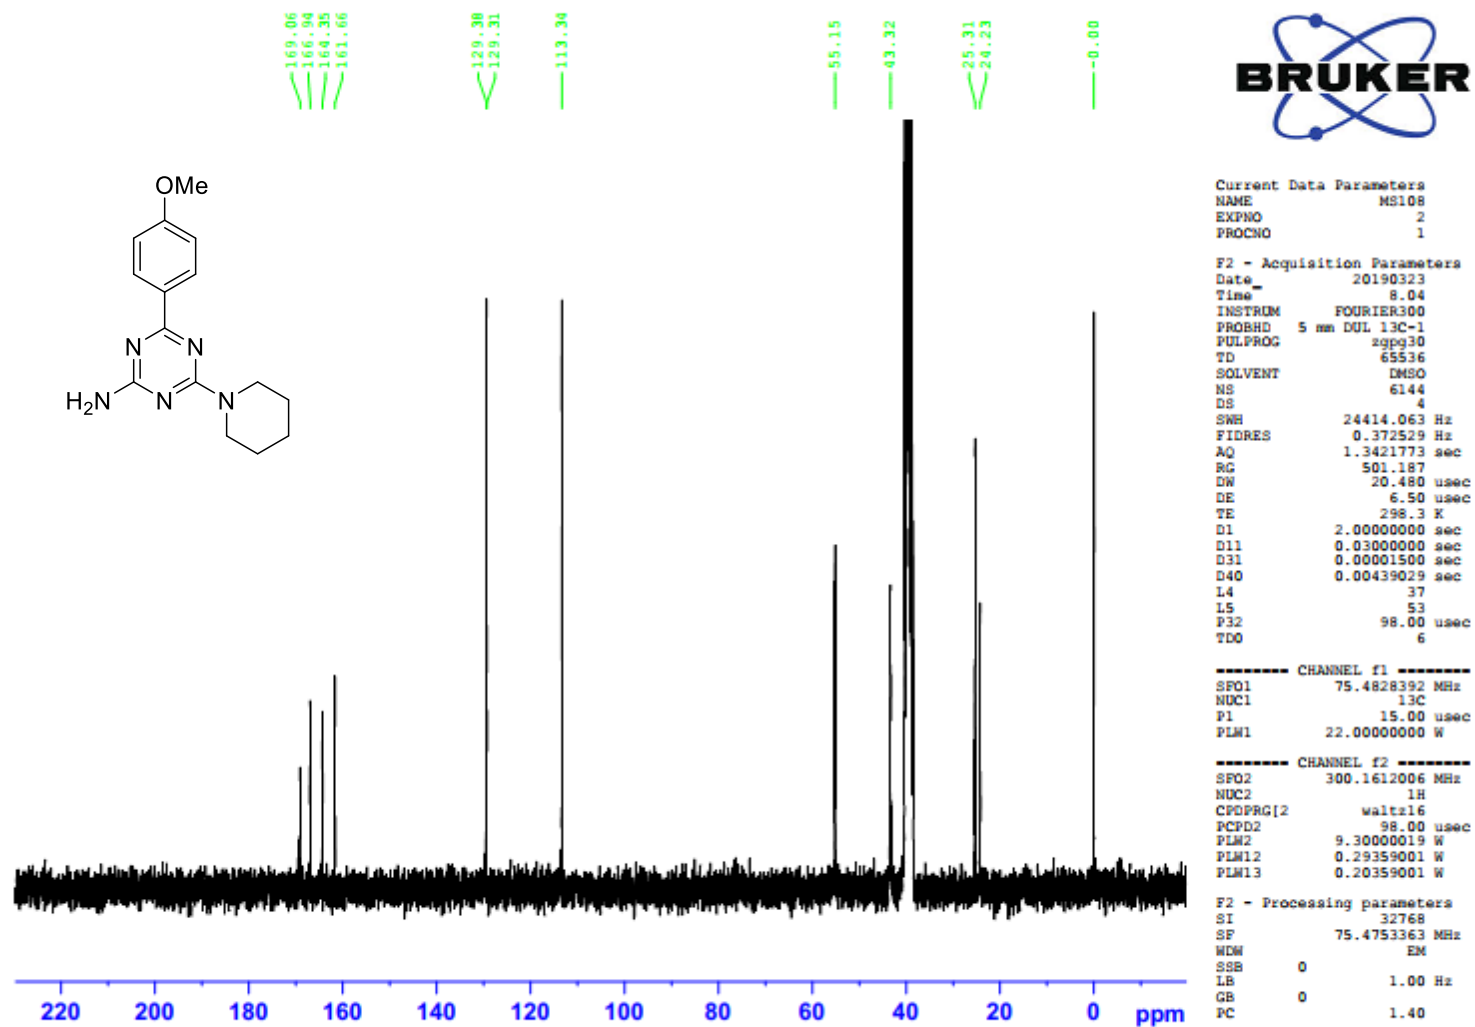

6-(3-Nitrophenyl)-4-piperidino-1,3,5-triazine-2-amine (9{2,10})

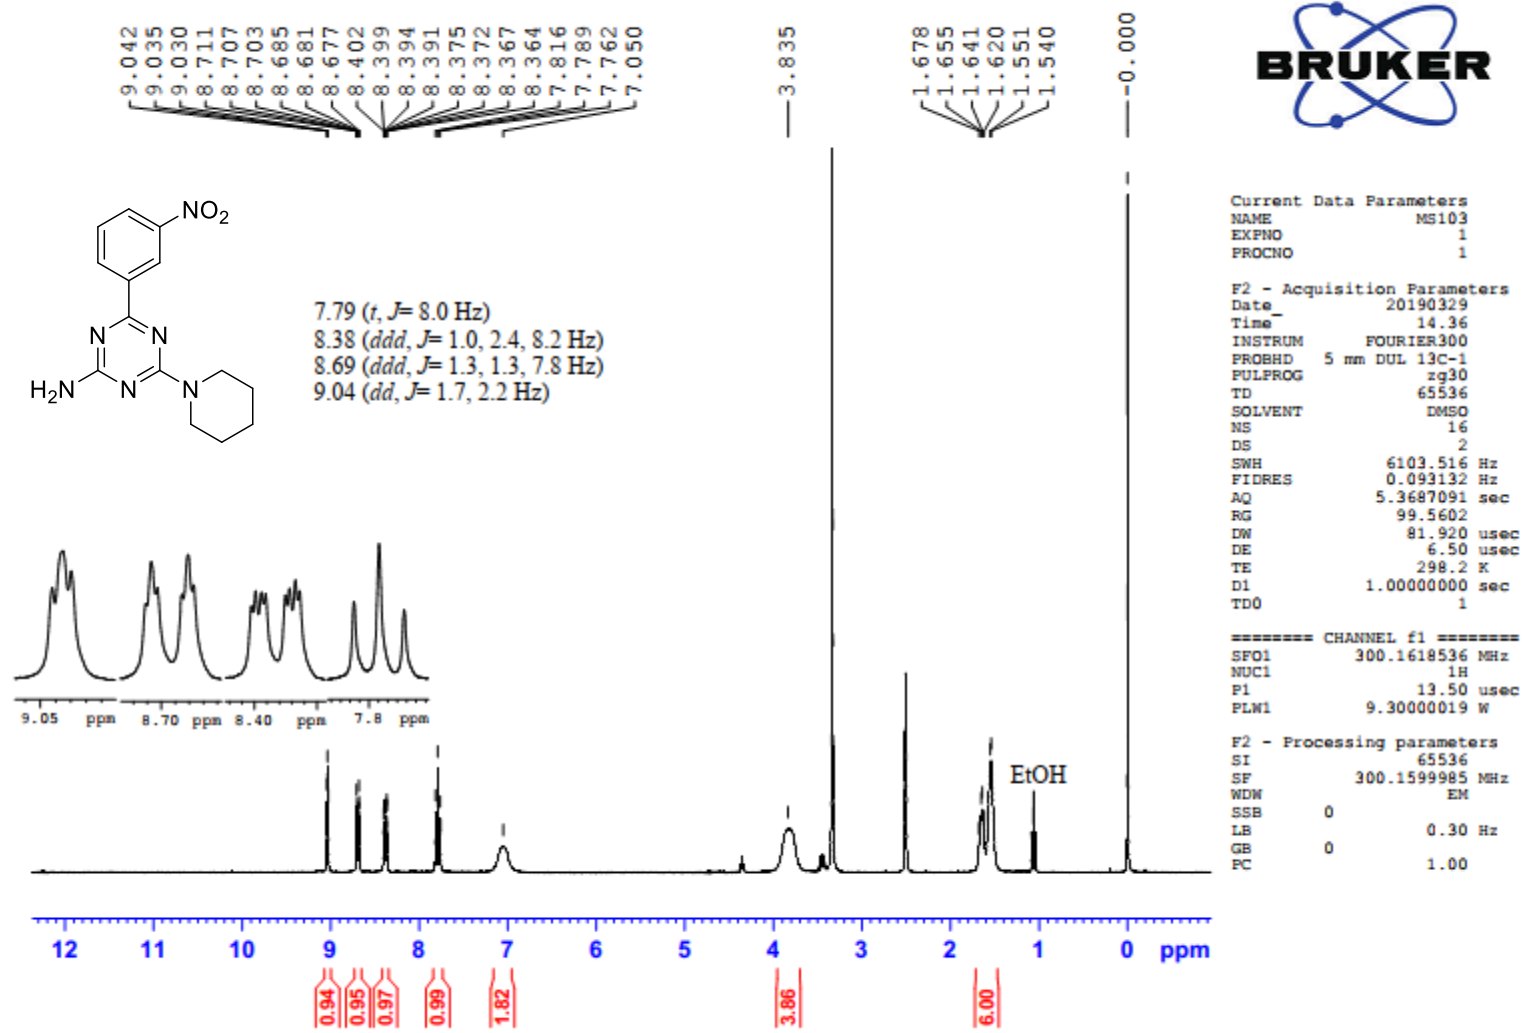

6-(3-Nitrophenyl)-4-piperidino-1,3,5-triazine-2-amine (9{2,10})

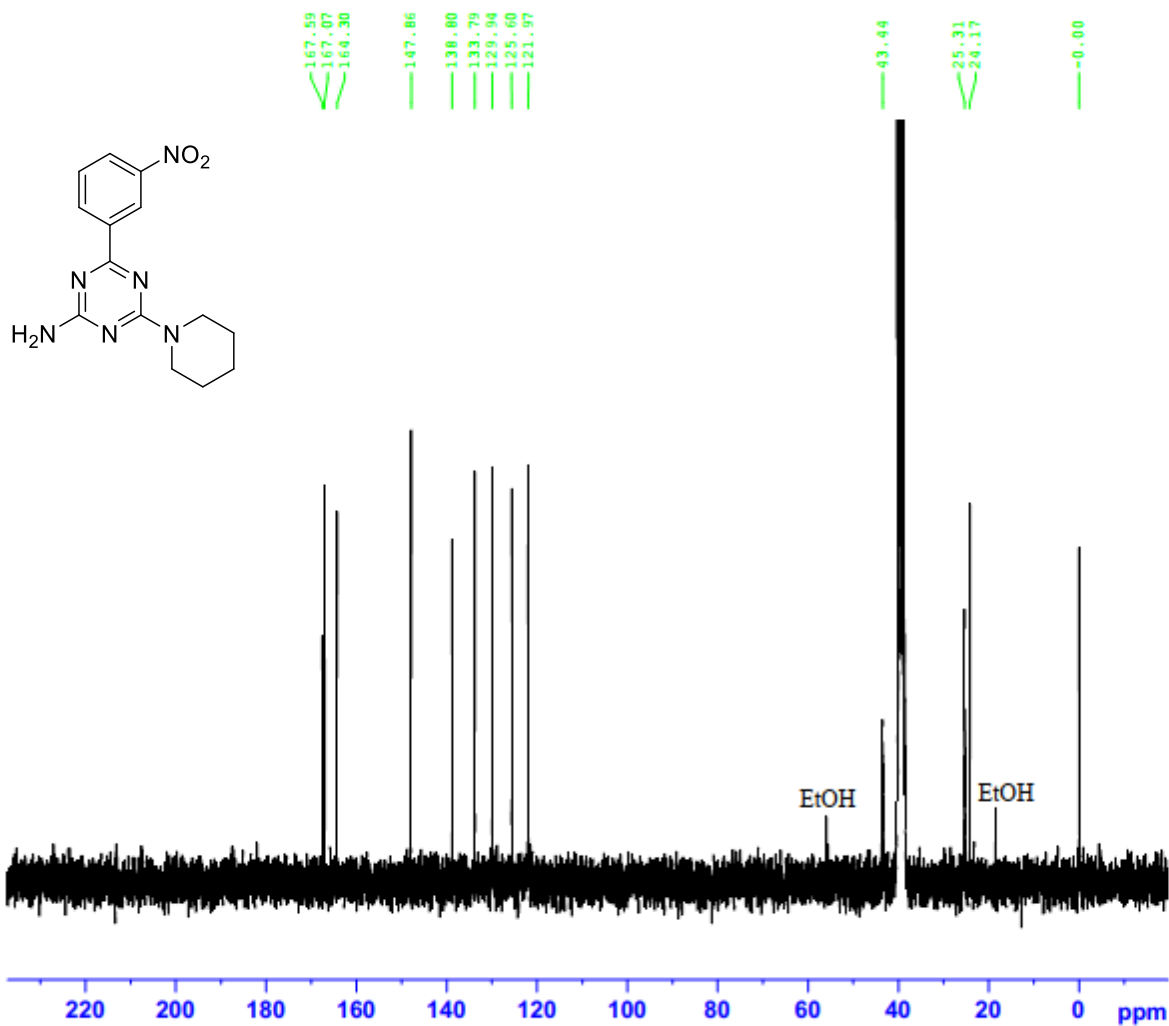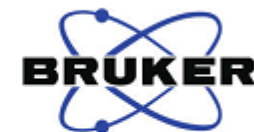

Current Data Parameters  
NAME MS103  
EXPNO 2  
PROCNO 1

F2 - Acquisition Parameters  
Date\_ 20190411  
Time 6.19  
INSTRUM FOURIER300  
PROBHD 5 mm DOL 13C-1  
PULPROG zgpg30  
TD 65536  
SOLVENT DMSO  
NS 3072  
DS 4  
SWH 24414.063 Hz  
FIDRES 0.372529 Hz  
AQ 1.3421773 sec  
RG 501.187  
DM 20.480 usec  
DE 6.50 usec  
TE 298.3 K  
D1 2.00000000 sec  
D11 0.03000000 sec  
D31 0.00001500 sec  
D40 0.00439029 sec  
L4 37  
L5 53  
P32 98.00 usec  
TDO 3

----- CHANNEL f1 -----  
SFO1 75.4828392 MHz  
NUC1 13C  
P1 15.00 usec  
PLW1 22.00000000 W

----- CHANNEL f2 -----  
SFO2 300.1612006 MHz  
NUC2 1H  
CPCPPRG[2] waltz16  
PCPD2 98.00 usec  
PLW2 9.30000019 W  
PLW12 0.29359001 W  
PLW13 0.20359001 W

F2 - Processing parameters  
SI 32768  
SF 75.4753344 MHz  
WDW EM  
SSB 0  
LB 1.00 Hz  
GB 0  
PC 1.40

6-[4-(Trifluoromethoxy)phenyl]-4-piperidino-1,3,5-triazine-2-amine (**9**{2,12})

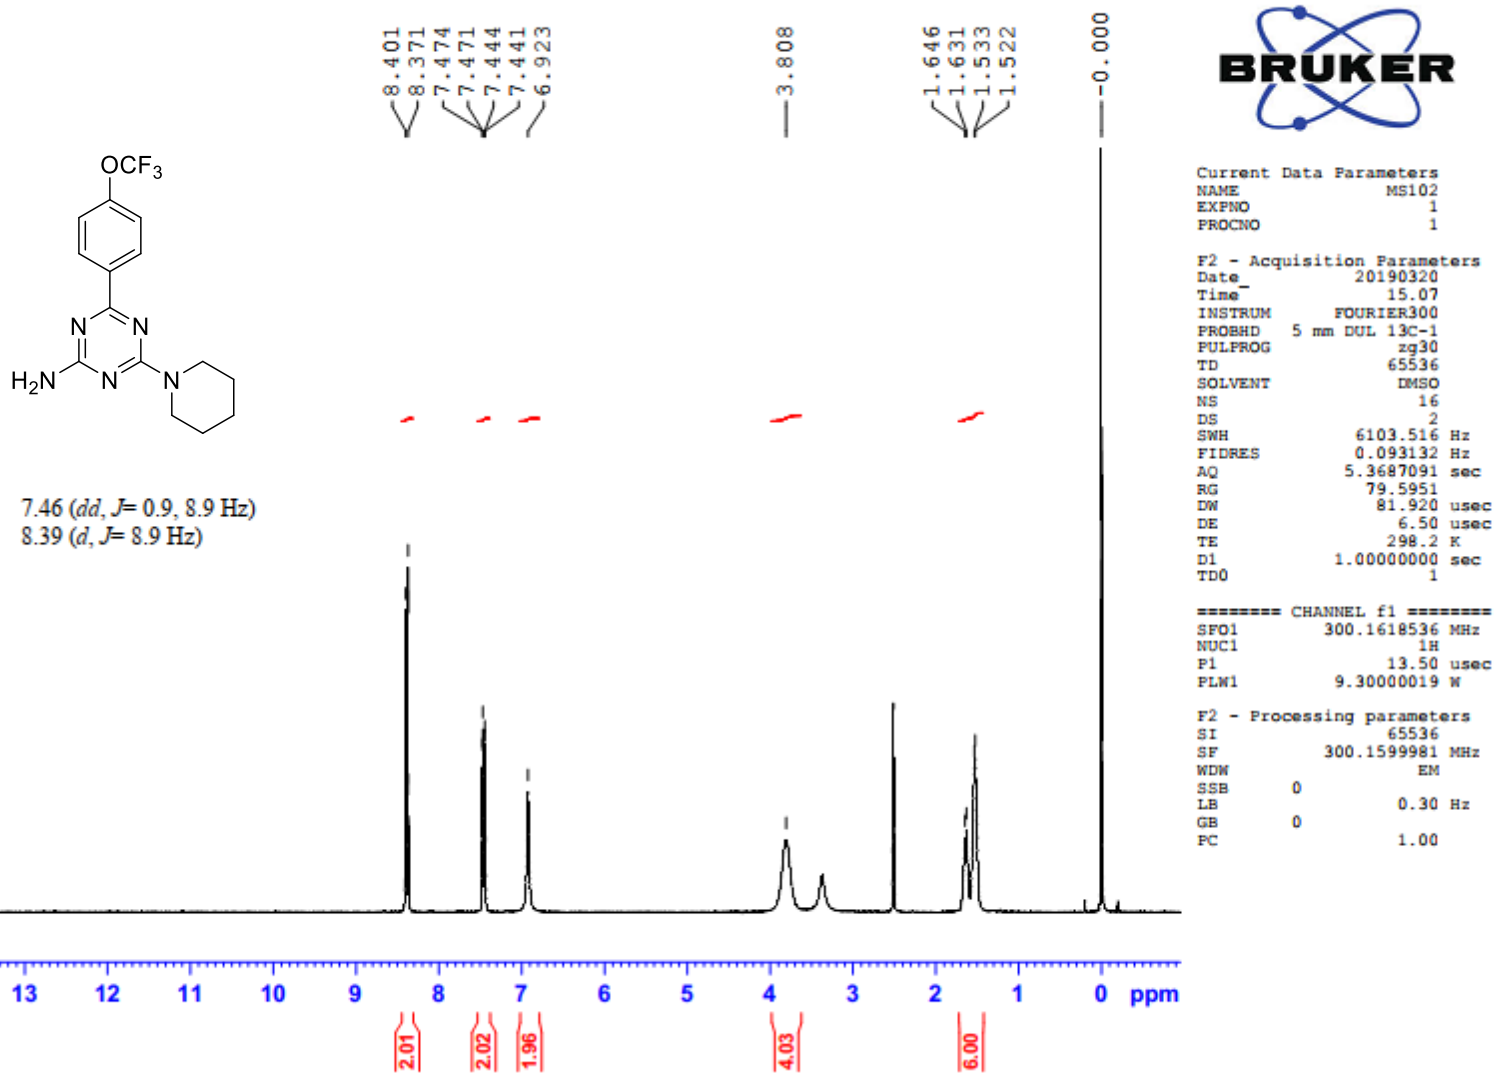



6-[4-(Trifluoromethoxy)phenyl]-4-piperidino-1,3,5-triazine-2-amine (9{2,12})

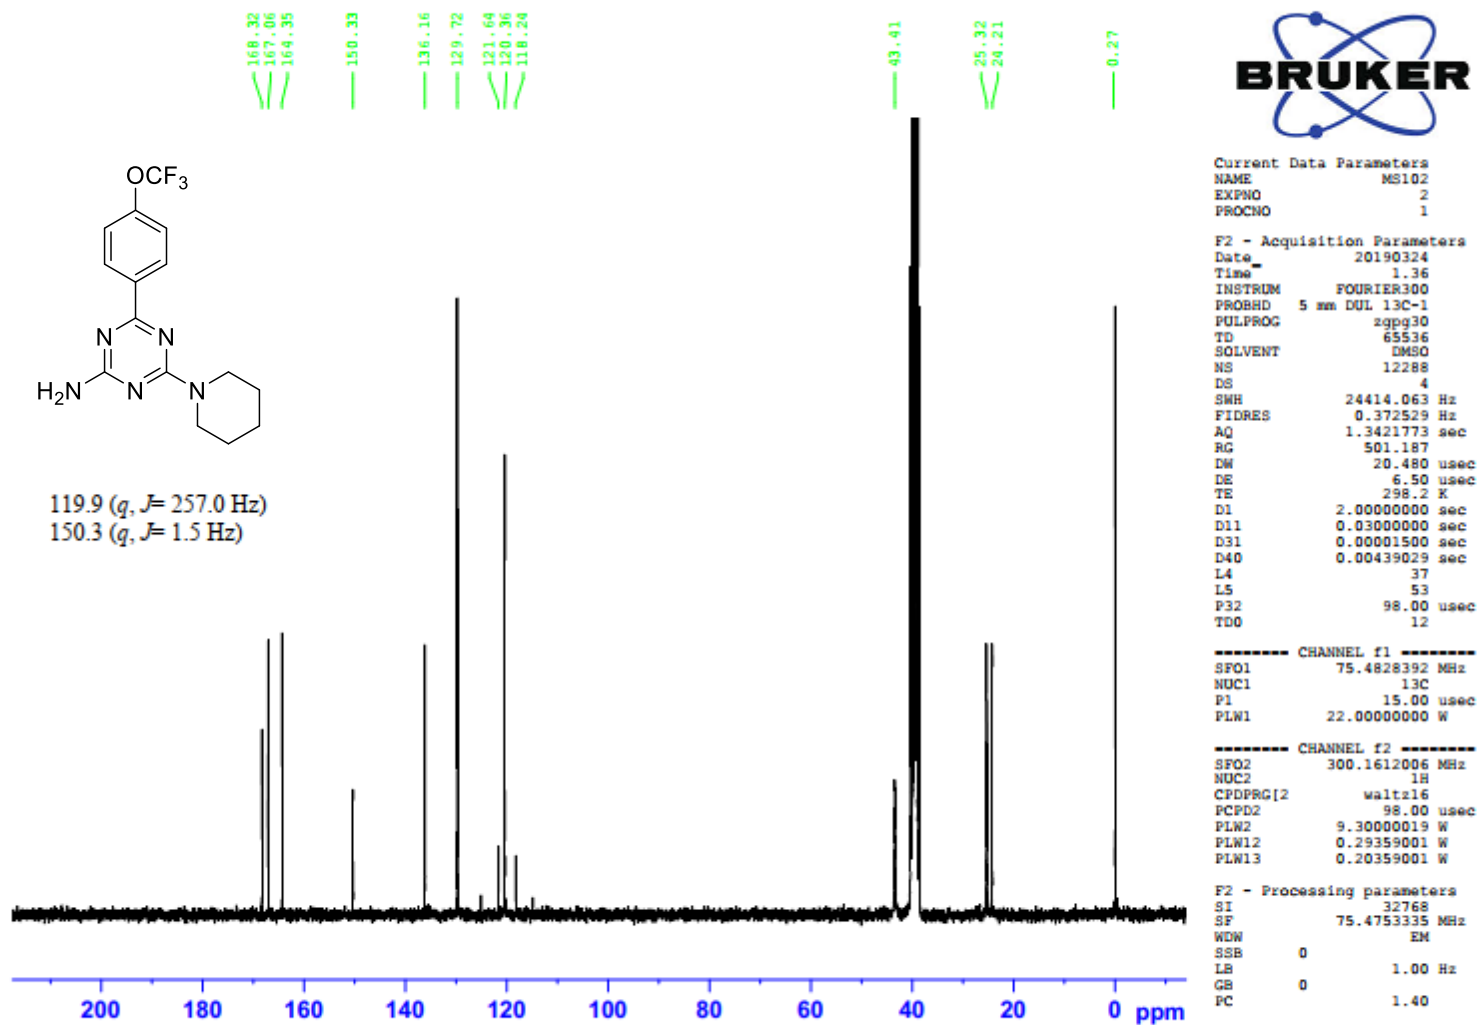

4-Piperidino-6-(3-phenoxyphenyl)-1,3,5-triazine-2-amine (9{2,13})

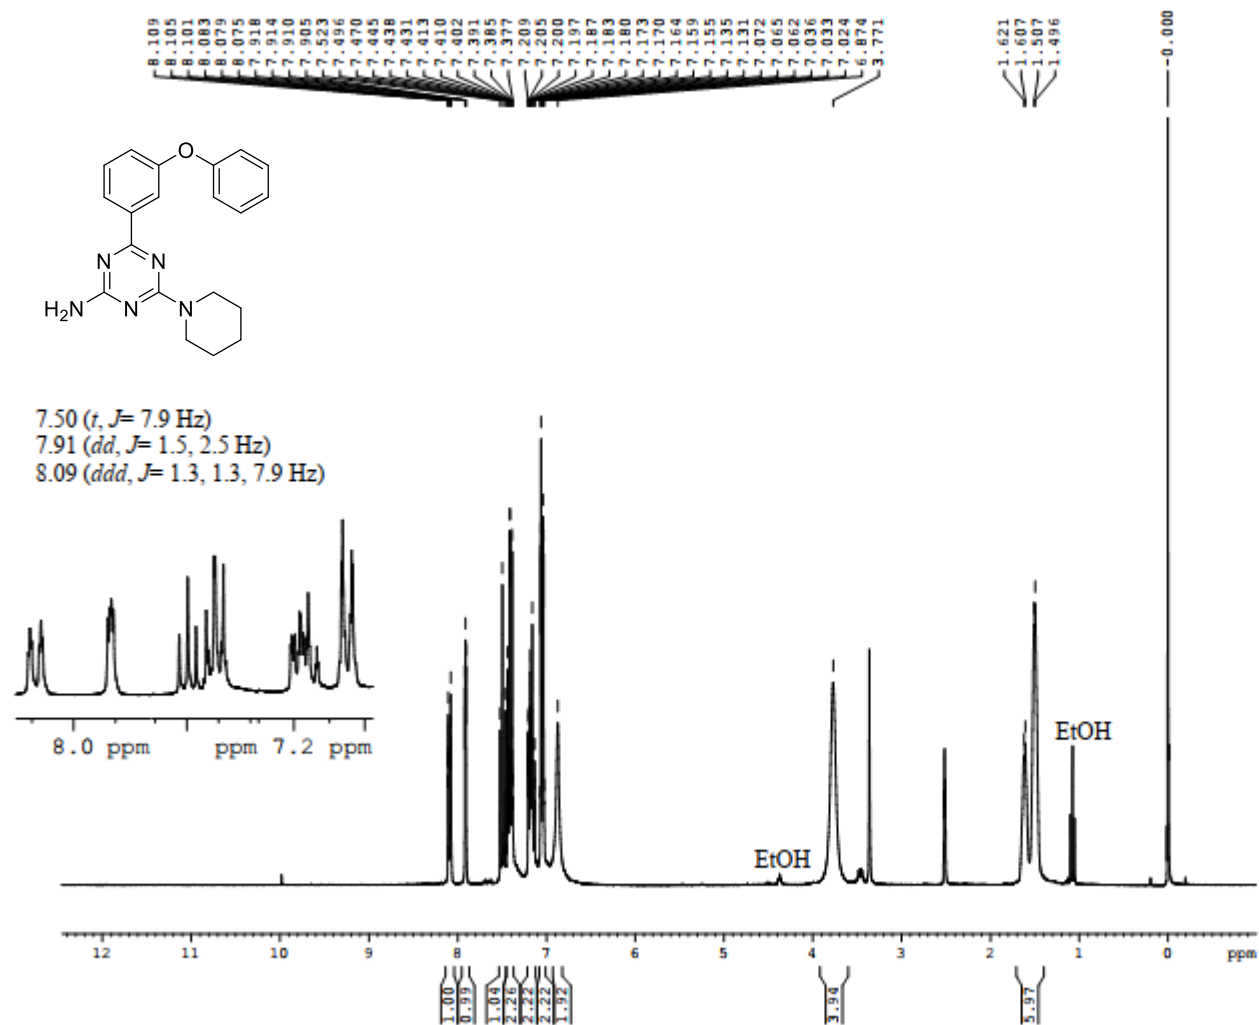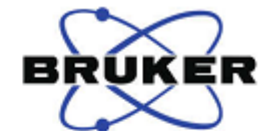

Current Data Parameters  
 NAME MS100  
 EXPNO 1  
 PROCNO 1

F2 - Acquisition Parameters  
 Date\_ 20190320  
 Time 14.59  
 INSTRUM FOURIER300  
 PROBRD 5 mm DUL 13C-1  
 PULPROG zg30  
 TD 65536  
 SOLVENT DMSO  
 NS 16  
 DS 2  
 SWH 6103.516 Hz  
 FIDRES 0.093132 Hz  
 AQ 5.3687091 sec  
 RG 31.623  
 DW 81.920 usec  
 DE 6.50 usec  
 TE 298.2 K  
 D1 1.00000000 sec  
 TDO 1

----- CHANNEL f1 -----  
 SFO1 300.1618536 MHz  
 NUC1 1H  
 P1 13.50 usec  
 PLW1 9.30000019 W

F2 - Processing parameters  
 SI 65536  
 SF 300.1599966 MHz  
 WDW EM  
 SSB 0  
 LB 0.30 Hz  
 GB 0  
 PC 1.00

4-Piperidino-6-(3-phenoxyphenyl)-1,3,5-triazine-2-amine (9{2,13})

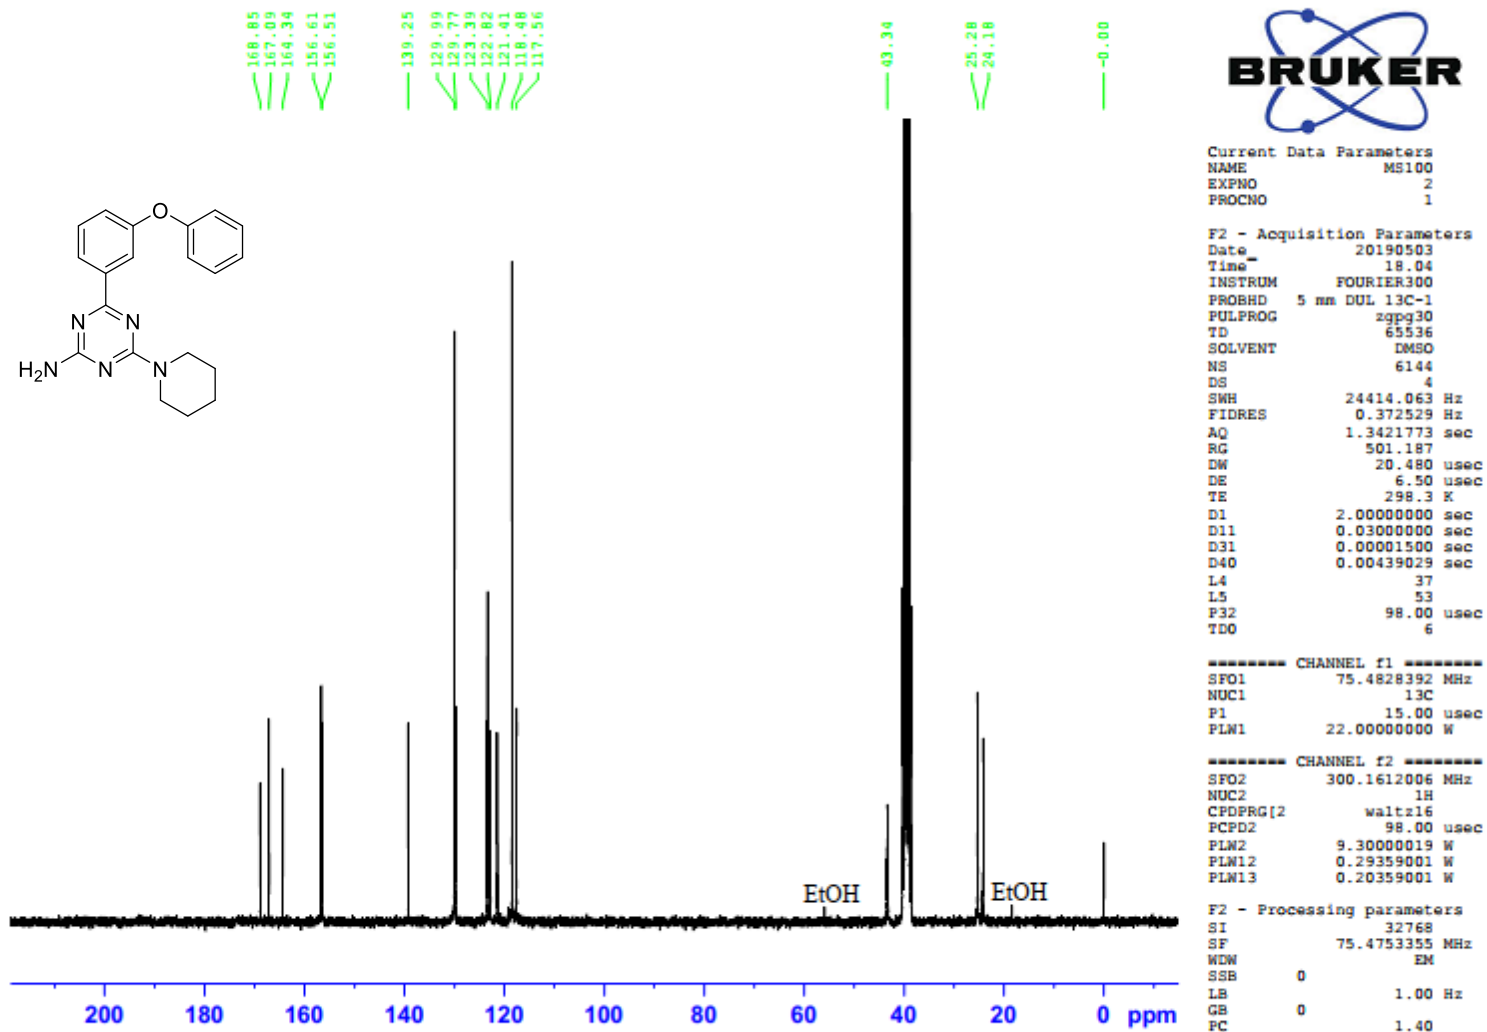

6-[3-(Benzyloxy)phenyl]-4-piperidino-1,3,5-triazine-2-amine (9{2,14})

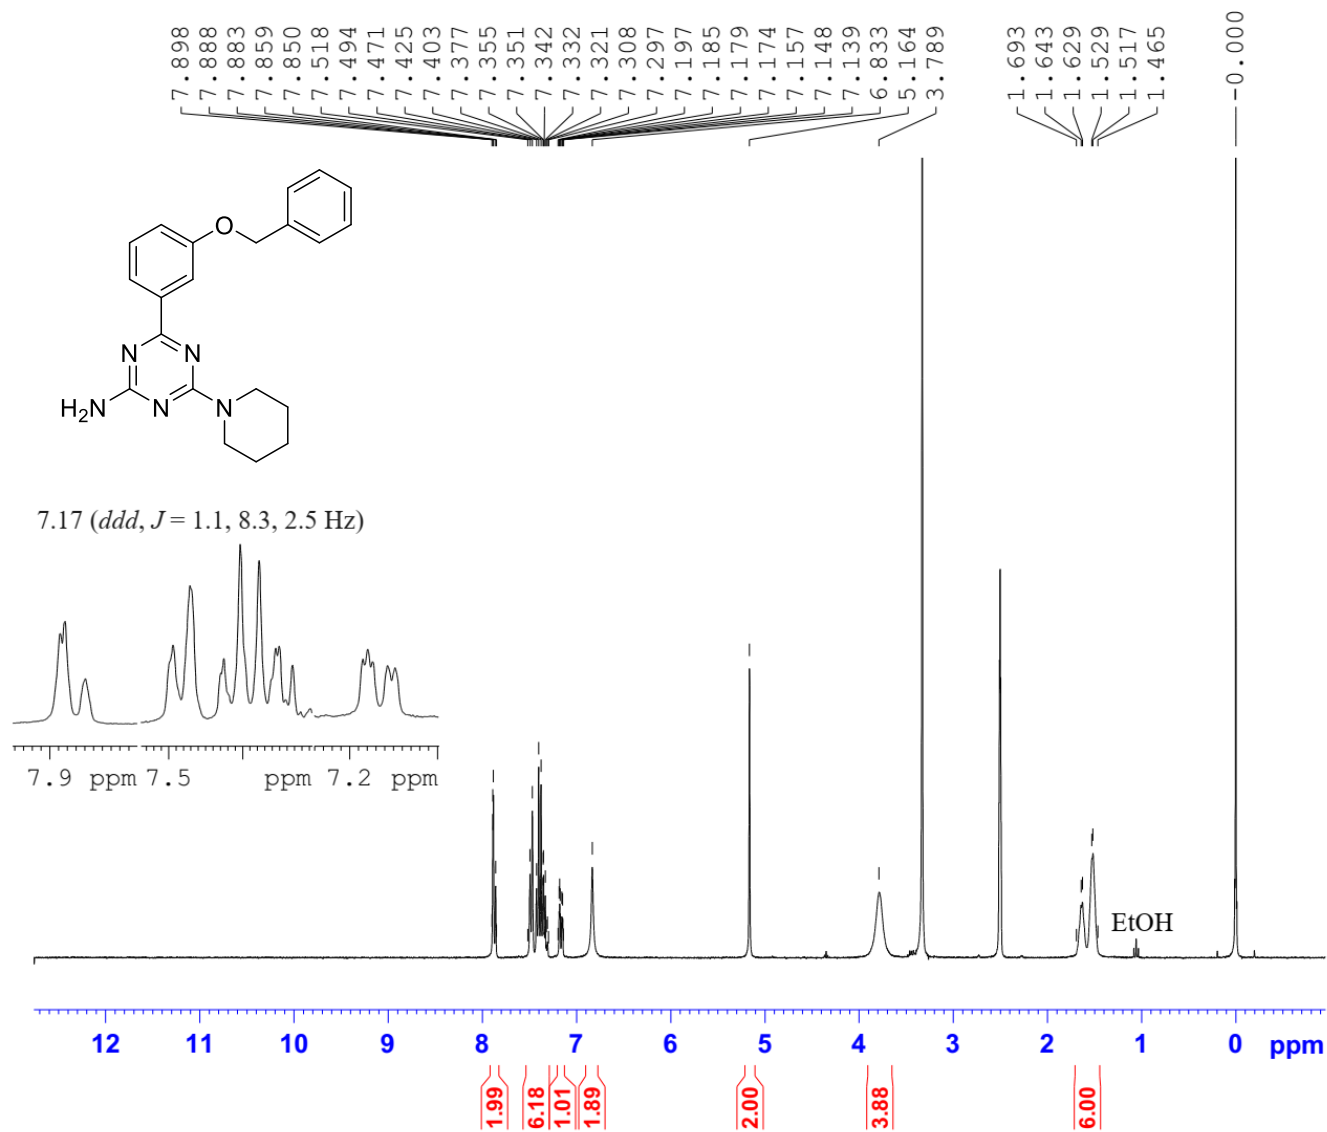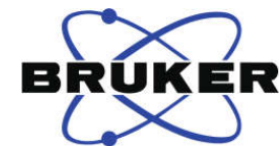

Current Data Parameters  
 NAME MS112  
 EXPNO 2  
 PROCNO 1

F2 - Acquisition Parameters  
 Date\_ 20211105  
 Time\_ 9.55  
 INSTRUM FOURIER300  
 PROBHD 5 mm DUL 13C-1  
 PULPROG zg30  
 TD 65536  
 SOLVENT DMSO  
 NS 16  
 DS 2  
 SWH 6103.516 Hz  
 FIDRES 0.093132 Hz  
 AQ 5.3687091 sec  
 RG 132.171  
 DW 81.920 usec  
 DE 6.50 usec  
 TE 298.1 K  
 D1 1.00000000 sec  
 TD0 1

==== CHANNEL f1 =====  
 SFO1 300.1618536 MHz  
 NUC1 1H  
 P1 13.50 usec  
 PLW1 9.30000019 W

F2 - Processing parameters  
 SI 65536  
 SF 300.1599990 MHz  
 WDW EM  
 SSB 0  
 LB 0.30 Hz  
 GB 0  
 PC 1.00

6-[3-(Benzyloxy)phenyl]-4-piperidino-1,3,5-triazine-2-amine (9{2,14})

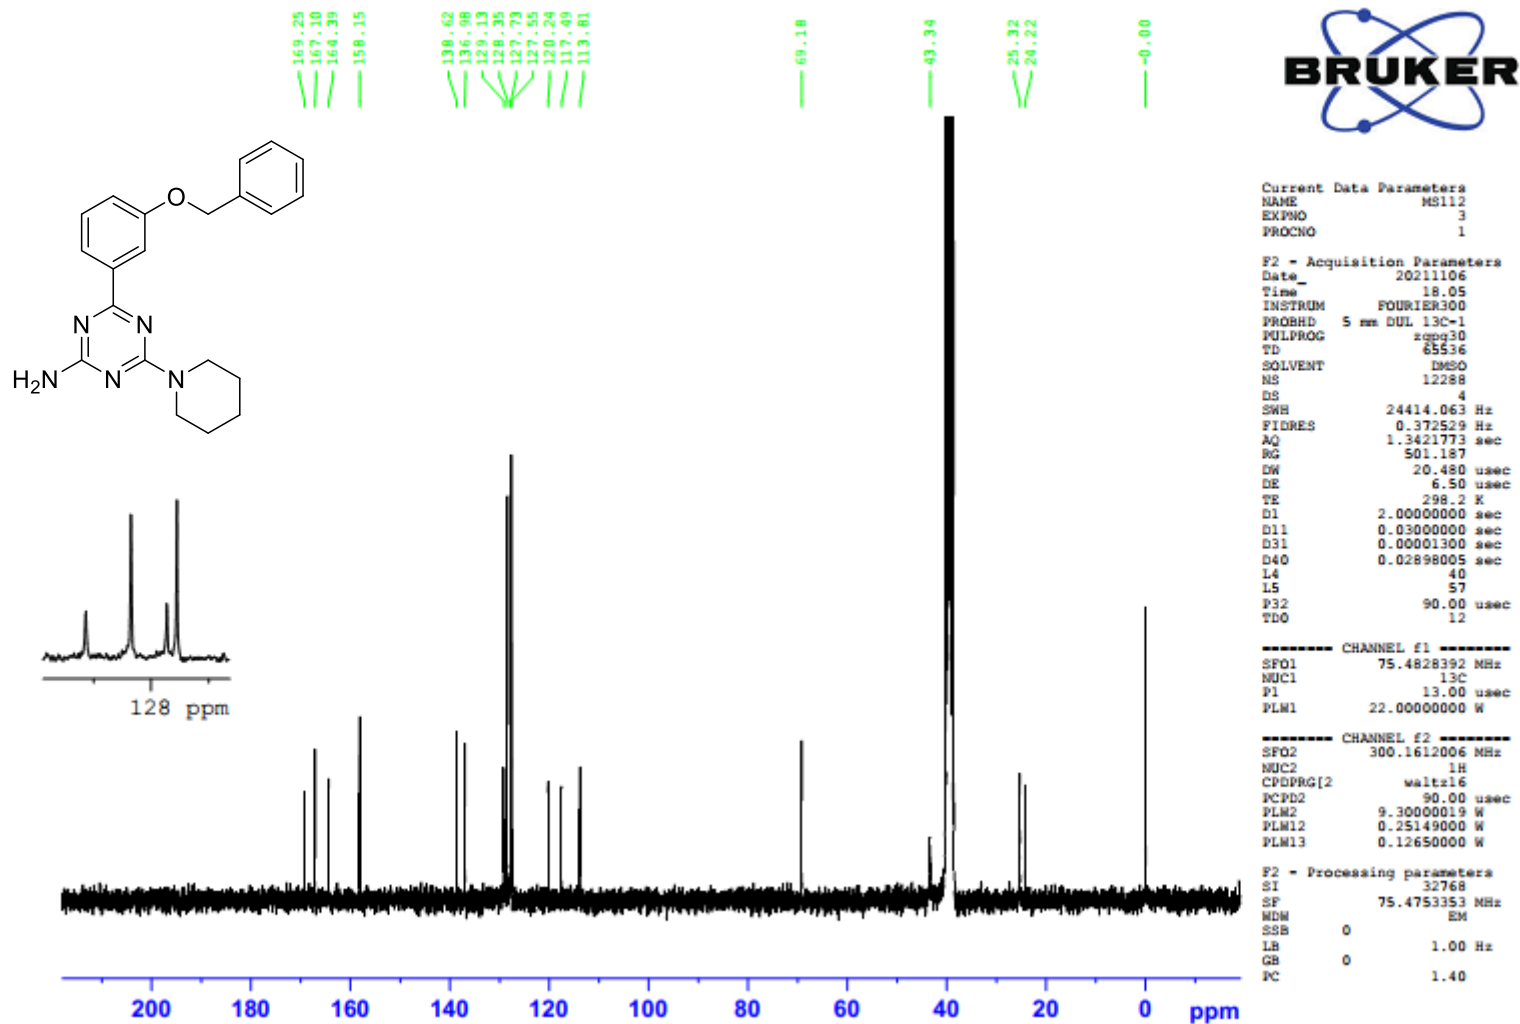

6-(3-Fluorophenyl)-4-(4-methylpiperidino)-1,3,5-triazine-2-amine (9{3,2})

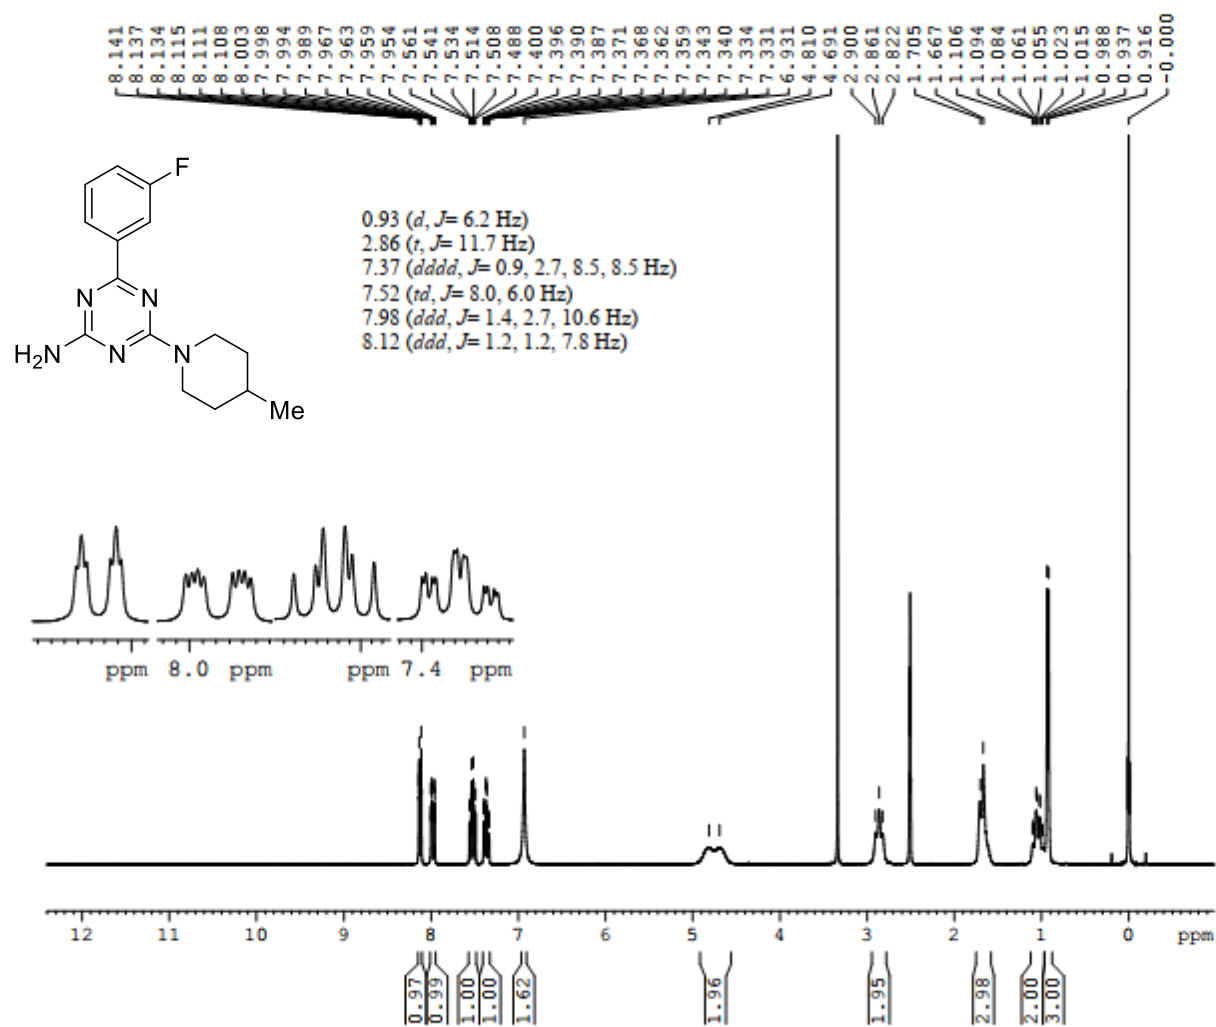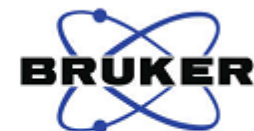

Current Data Parameters  
 NAME MS155  
 EXPNO 1  
 PROCNO 1

F2 - Acquisition Parameters  
 Date 20190514  
 Time 14.29  
 INSTRUM FOURIER300  
 PROBHD 5 mm DUL 13C-1  
 PULPROG zg30  
 TD 65536  
 SOLVENT DMSO  
 NS 16  
 DS 2  
 SWH 6103.516 Hz  
 FIDRES 0.093132 Hz  
 AQ 5.3687091 sec  
 RG 79.9719  
 DW 81.920 usec  
 DE 6.50 usec  
 TE 296.7 K  
 D1 1.00000000 sec  
 TD0 1

==== CHANNEL f1 =====  
 SFO1 300.1618536 MHz  
 NUC1 1H  
 P1 13.50 usec  
 PLW1 9.30000019 W

F2 - Processing parameters  
 SI 65536  
 SF 300.1599985 MHz  
 WDW EM  
 SSB 0  
 LB 0.30 Hz  
 GB 0  
 PC 1.00

6-(3-Fluorophenyl)-4-(4-methylpiperidino)-1,3,5-triazine-2-amine (9{3,2})

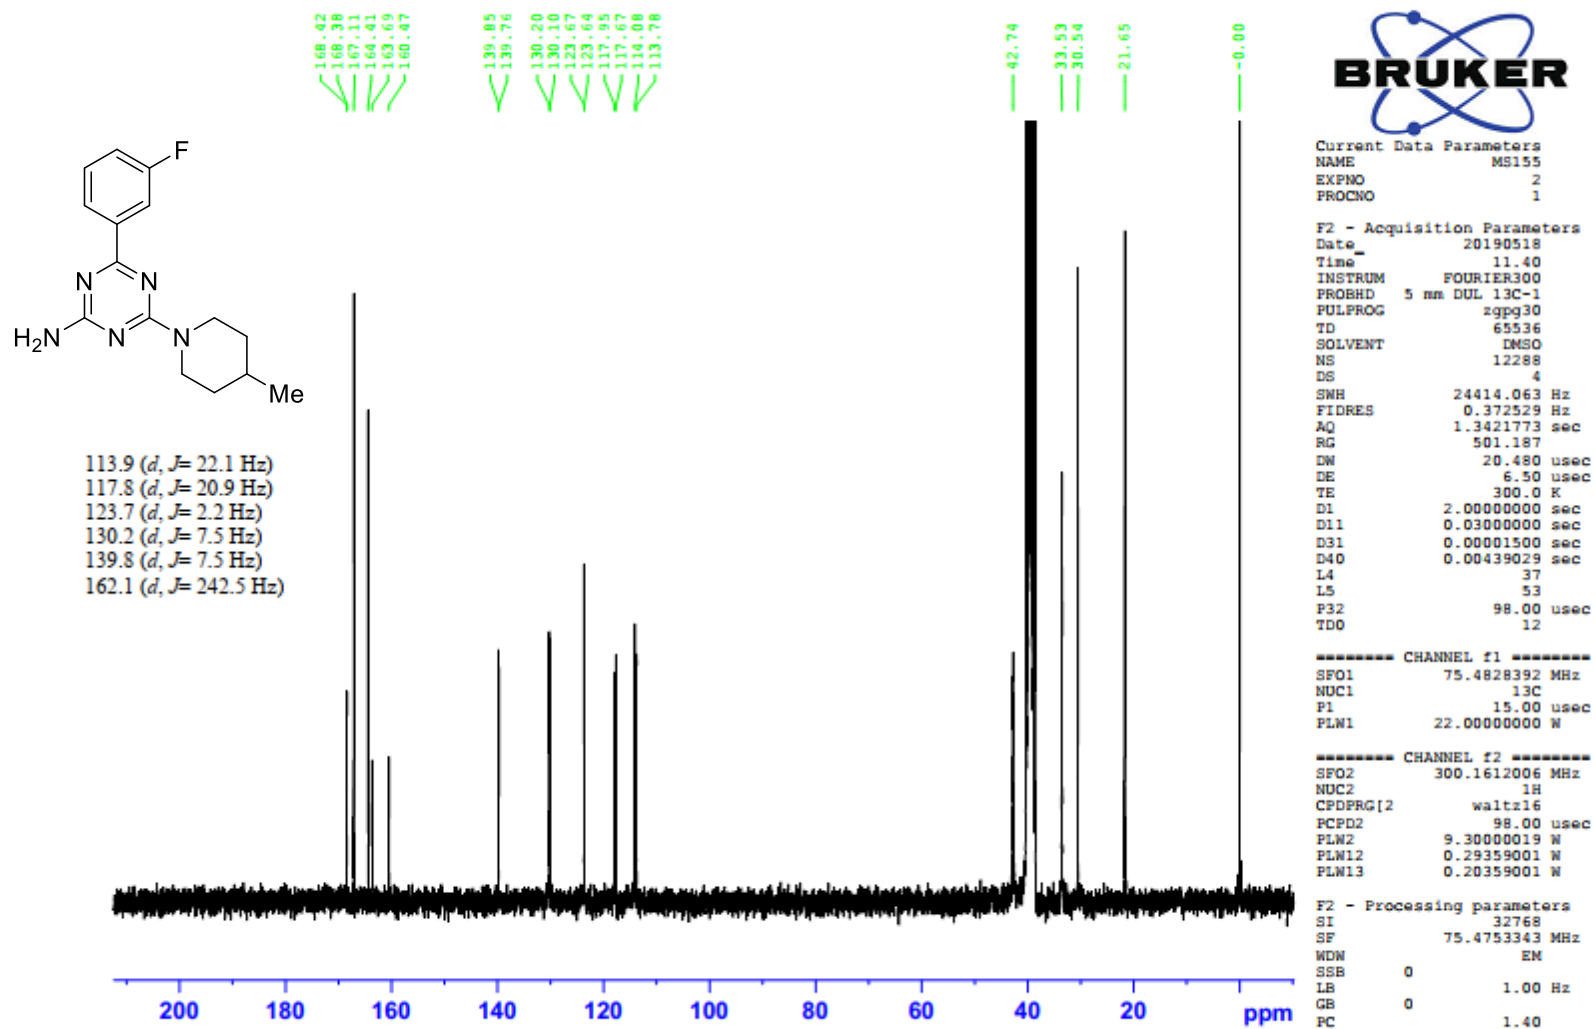

6-(4-Fluorophenyl)-4-(4-methylpiperidino)-1,3,5-triazine-2-amine (9{3,3})

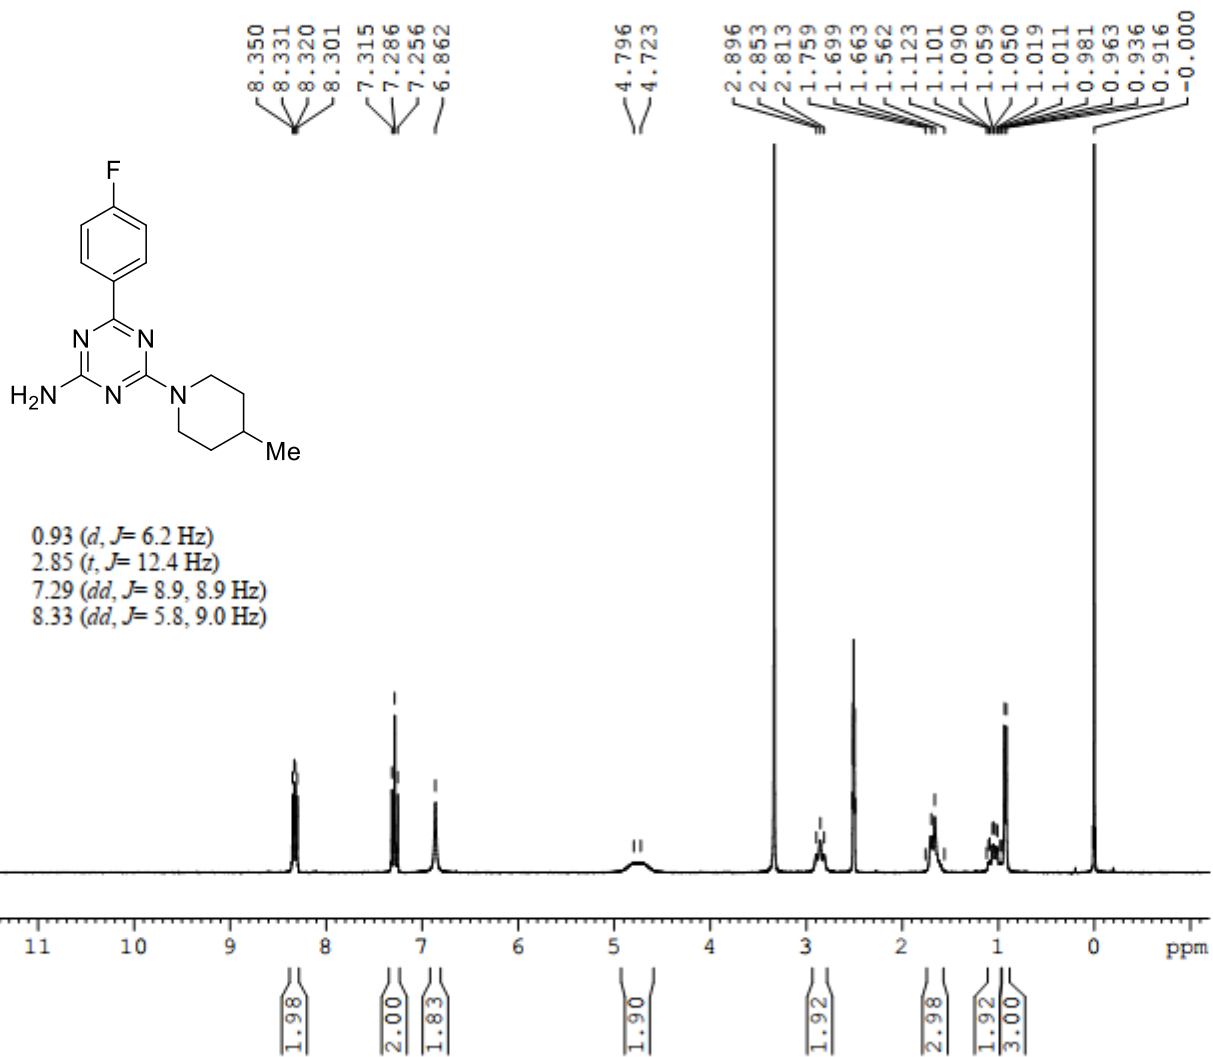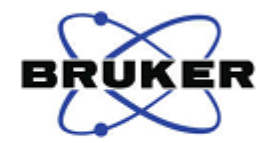

Current Data Parameters  
NAME MS151  
EXPNO 1  
PROCNO 1

F2 - Acquisition Parameters  
Date\_ 20190528  
Time\_ 17.17  
INSTRUM FOURIER300  
PROBHD 5 mm DUL 13C-1  
PULPROG zg30  
TD 65536  
SOLVENT DMSO  
NS 16  
DS 2  
SWH 6103.516 Hz  
FIDRES 0.093132 Hz  
AQ 5.3687091 sec  
RG 94.869  
DM 81.920 usec  
DE 6.50 usec  
TE 298.2 K  
D1 1.00000000 sec  
TD0 1

==== CHANNEL f1 =====  
SFO1 300.1618536 MHz  
NUC1 1H  
P1 13.50 usec  
PLW1 9.30000019 W

F2 - Processing parameters  
SI 65536  
SF 300.1599992 MHz  
WDW EM  
SSB 0  
LB 0.30 Hz  
GB 0  
PC 1.00



6-(4-Fluorophenyl)-4-(4-methylpiperidino)-1,3,5-triazine-2-amine (9{3,3})

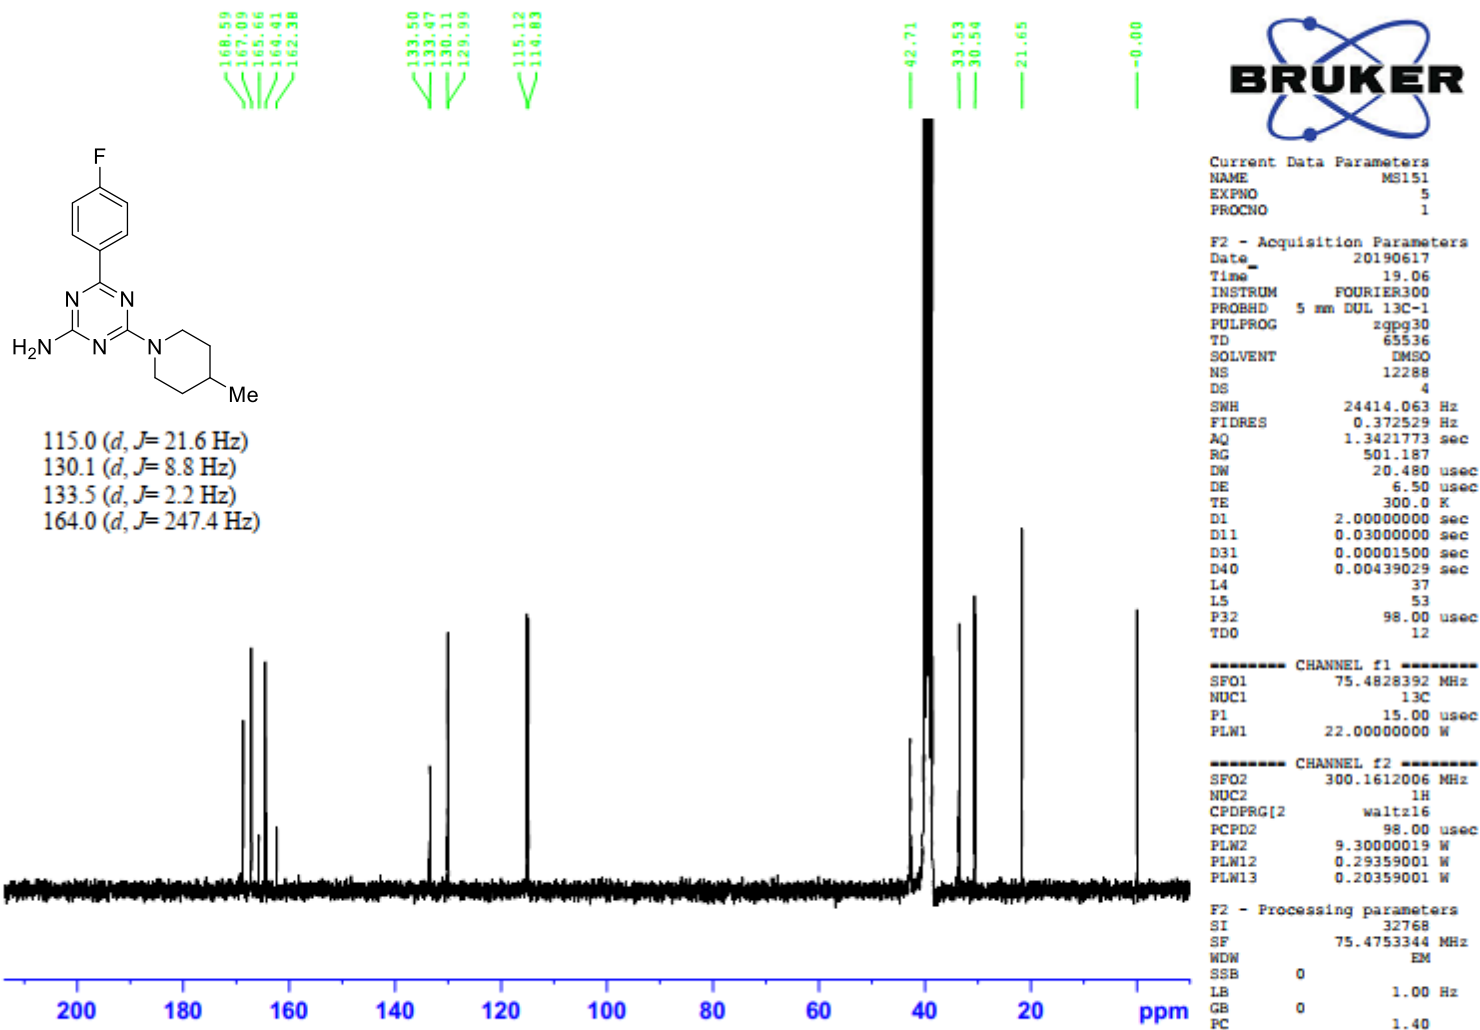

6-(4-Chlorophenyl)-4-(4-methylpiperidino)-1,3,5-triazine-2-amine (9{3,4})

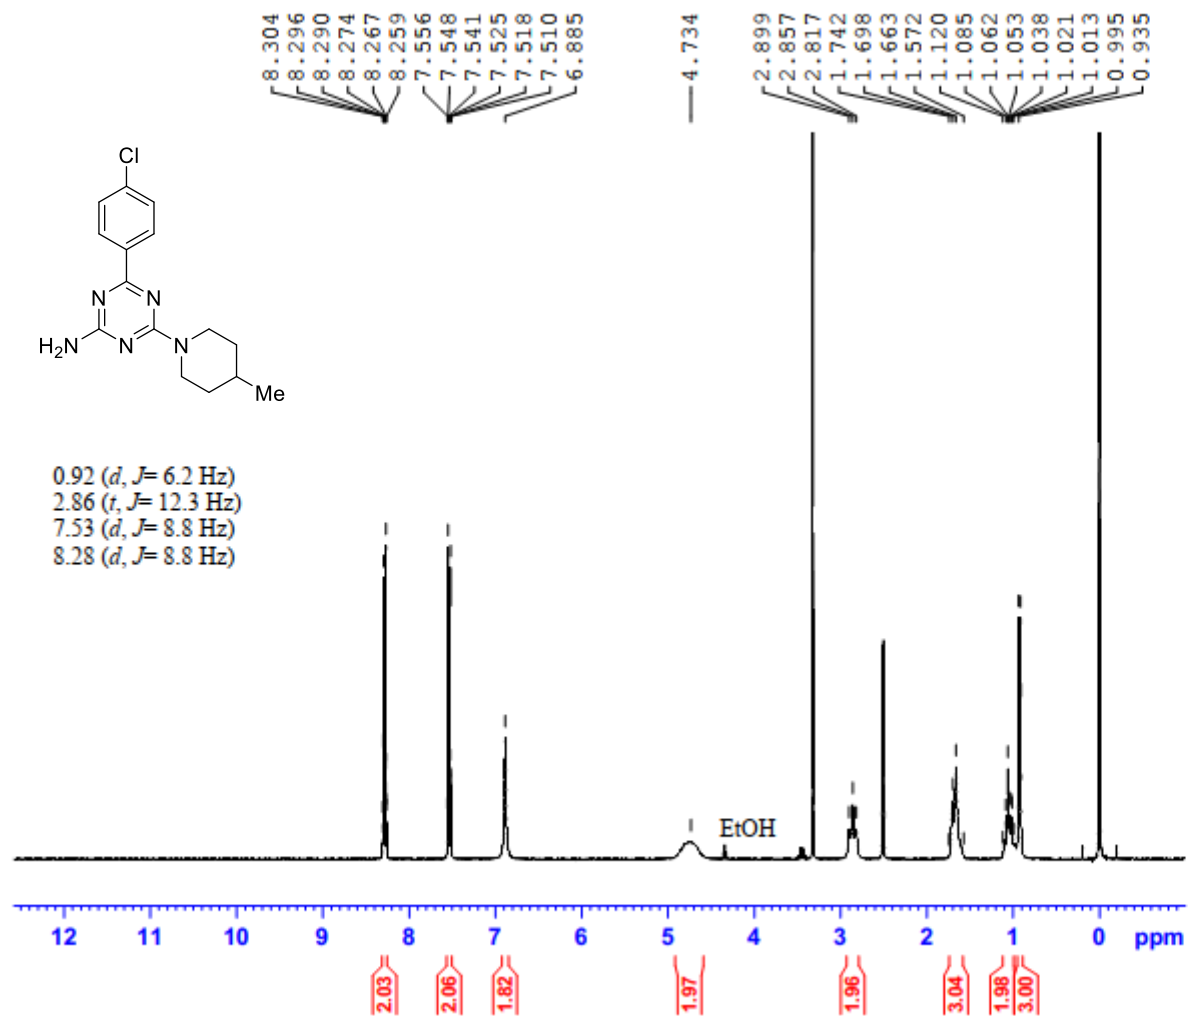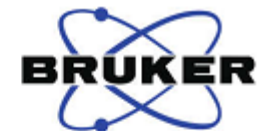

Current Data Parameters  
 NAME MS174  
 EXPNO 1  
 PROCNO 1

F2 - Acquisition Parameters  
 Date\_ 20190521  
 Time 13.31  
 INSTRUM FOURIER300  
 PROBHD 5 mm DUL 13C-1  
 PULPROG zg30  
 TD 65536  
 SOLVENT DMSO  
 NS 16  
 DS 2  
 SWH 6103.516 Hz  
 FIDRES 0.093132 Hz  
 AQ 5.3687091 sec  
 RG 79.8404  
 DW 81.920 usec  
 DE 6.50 usec  
 TE 300.0 K  
 D1 1.00000000 sec  
 TDO 1

===== CHANNEL f1 =====  
 SFO1 300.1618536 MHz  
 NUC1 1H  
 P1 13.50 usec  
 PLW1 9.30000019 W

F2 - Processing parameters  
 SI 65536  
 SF 300.1599988 MHz  
 WDW EM  
 SSB 0  
 LB 0.30 Hz  
 GB 0  
 PC 1.00

6-(4-Chlorophenyl)-4-(4-methylpiperidino)-1,3,5-triazine-2-amine (9{3,4})

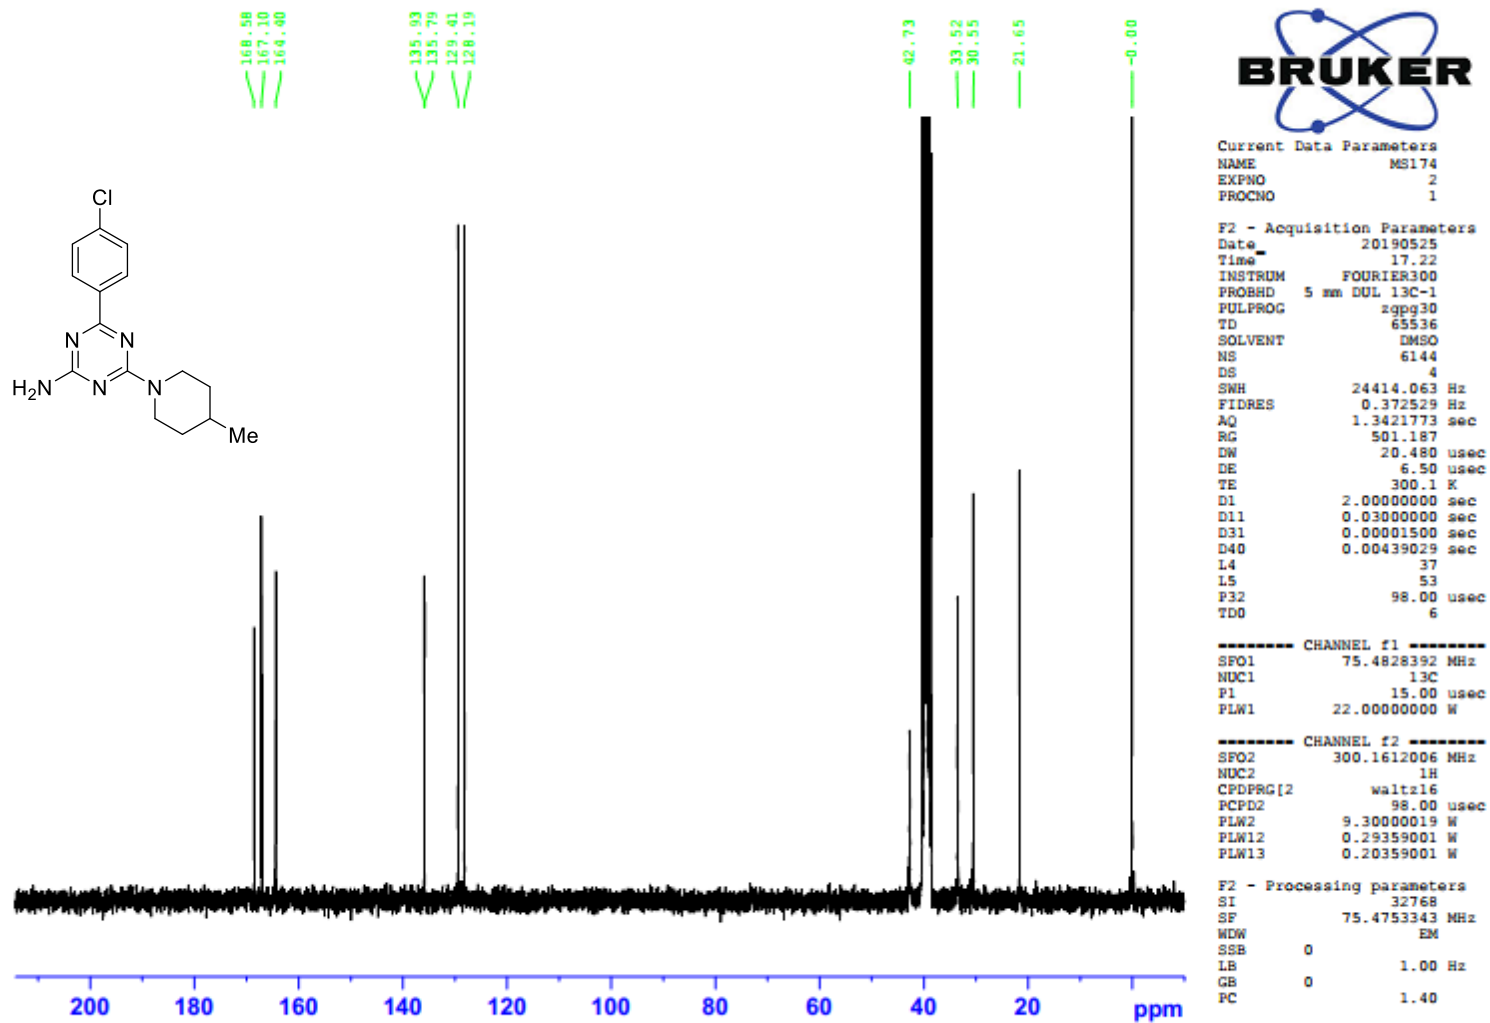

6-(4-Methylphenyl)-4-(4-methylpiperidino)-1,3,5-triazine-2-amine (9{3,6})

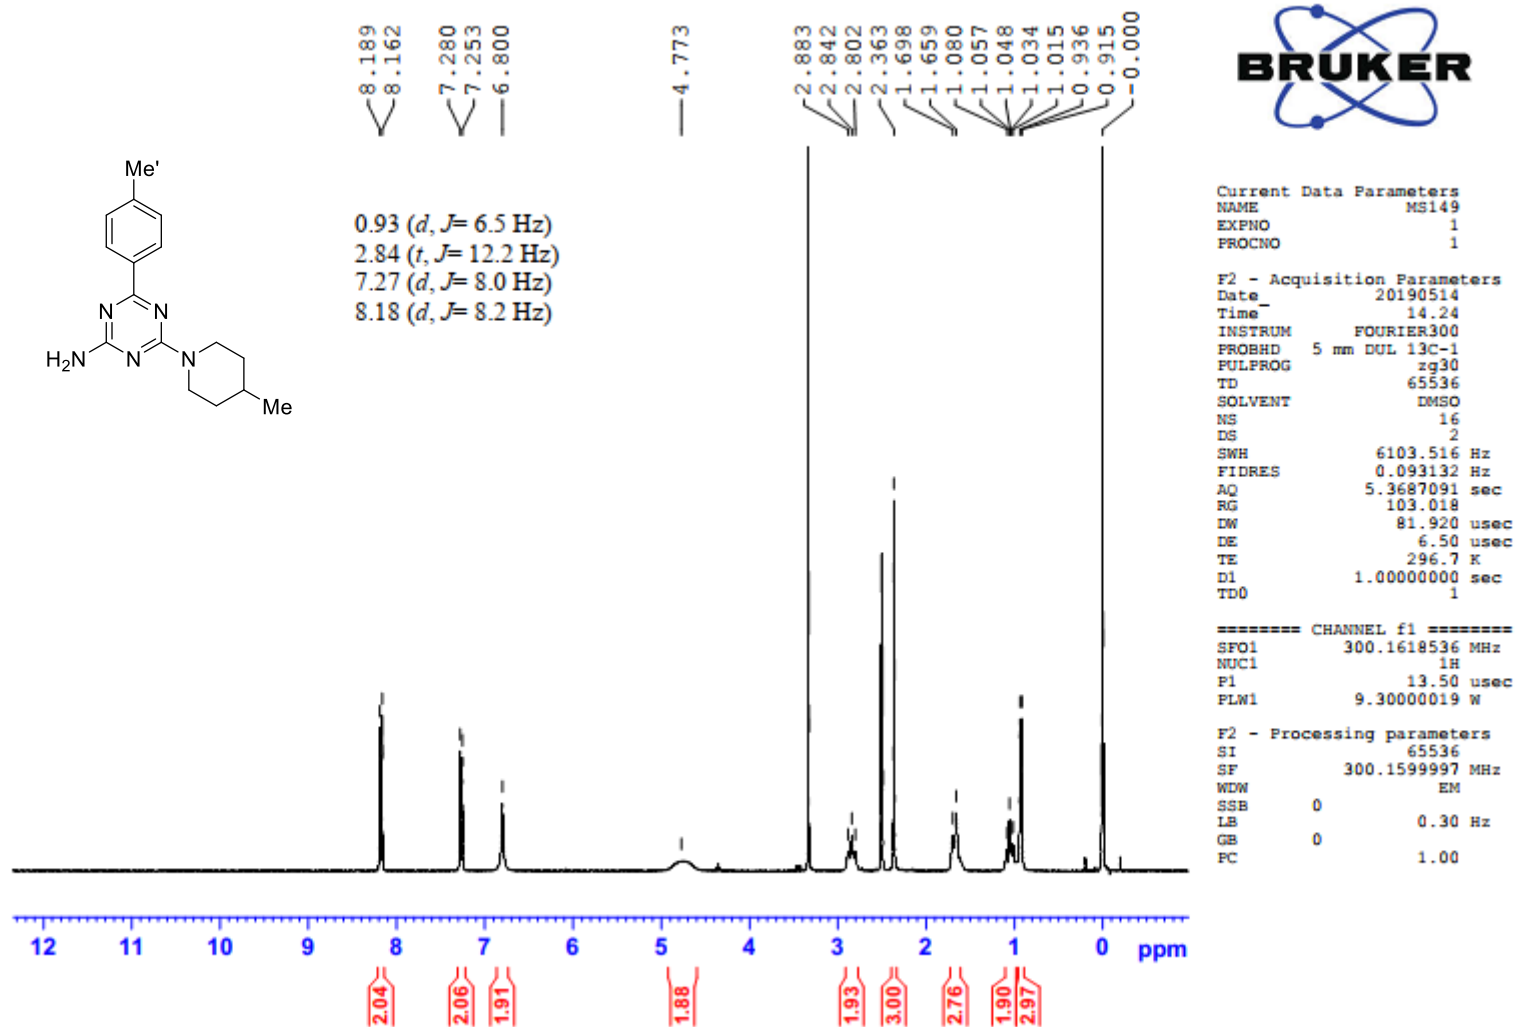

6-(4-Methylphenyl)-4-(4-methylpiperidino)-1,3,5-triazine-2-amine (9{3,6})

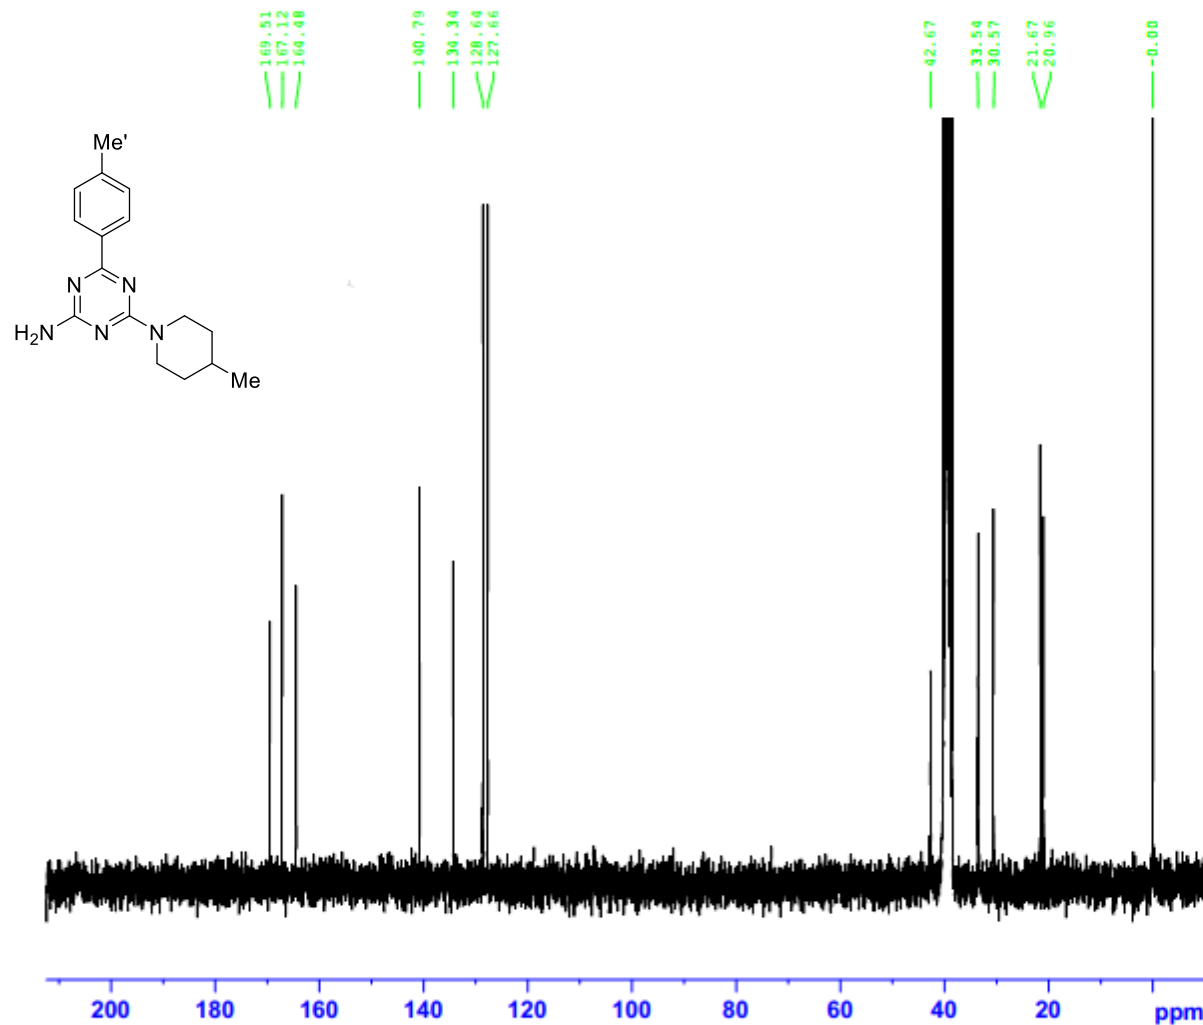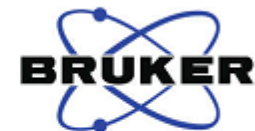

Current Data Parameters  
NAME MS149  
EXPNO 2  
PROCNO 1

F2 - Acquisition Parameters  
Date\_ 20190517  
Time 23.56  
INSTRUM FOURIER300  
PROBHD 5 mm DUL 13C-1  
PULPROG zgpg30  
TD 65536  
SOLVENT DMSO  
NS 6144  
DS 4  
SNH 24414.063 Hz  
FIDRES 0.372529 Hz  
AQ 1.3421773 sec  
RG 501.187  
RW 20.480 usec  
DE 6.50 usec  
TE 300.1 K  
D1 2.00000000 sec  
D11 0.03000000 sec  
D31 0.00001500 sec  
D40 0.00439029 sec  
L4 37  
L5 53  
P32 98.00 usec  
TDO 6

\*\*\*\*\* CHANNEL f1 \*\*\*\*\*  
SFO1 75.4828392 MHz  
NUC1 13C  
P1 15.00 usec  
PLW1 22.00000000 W

\*\*\*\*\* CHANNEL f2 \*\*\*\*\*  
SFO2 300.1612006 MHz  
NUC2 1H  
CPDPRG[2] waltz16  
PCPD2 98.00 usec  
PLW2 9.30000019 W  
PLW12 0.29359001 W  
PLW13 0.20359001 W

F2 - Processing parameters  
SI 32768  
SF 75.4753352 MHz  
WDW EM  
SSB 0  
LB 1.00 Hz  
GB 0  
PC 1.40

6-[4-(*N,N*-Dimethylamino)phenyl]-4-(4-methylpiperidino)-1,3,5-triazine-2-amine (9{3,8})

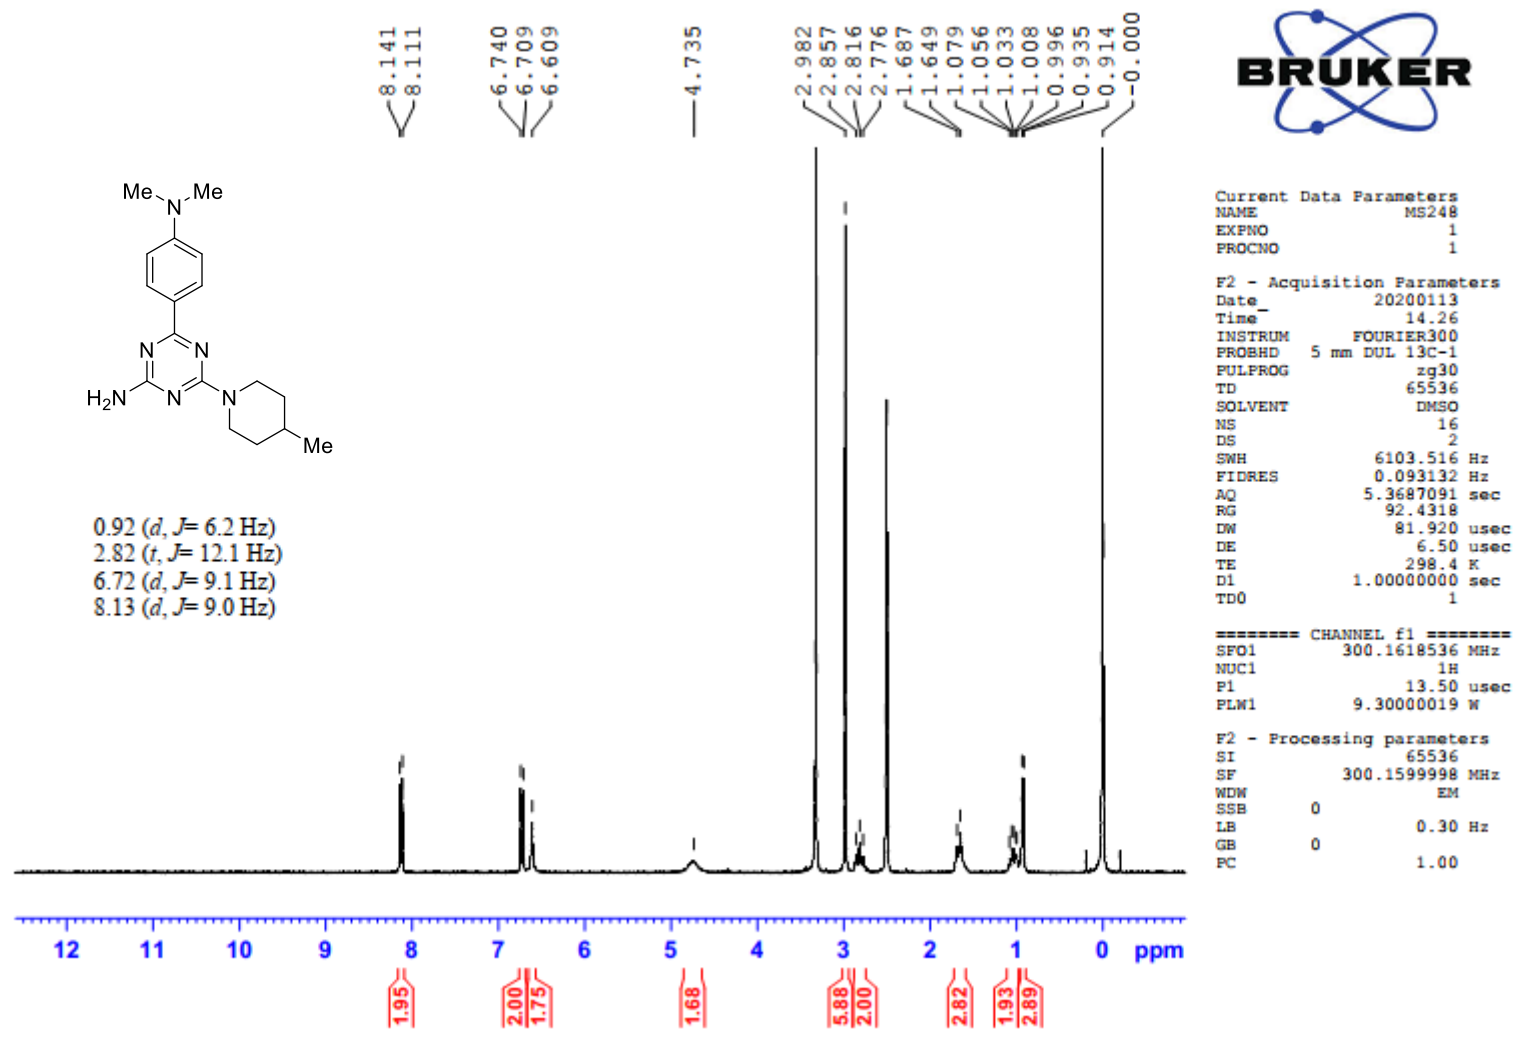

6-[4-(*N,N*-Dimethylamino)phenyl]-4-(4-methylpiperidino)-1,3,5-triazine-2-amine (9{3,8})

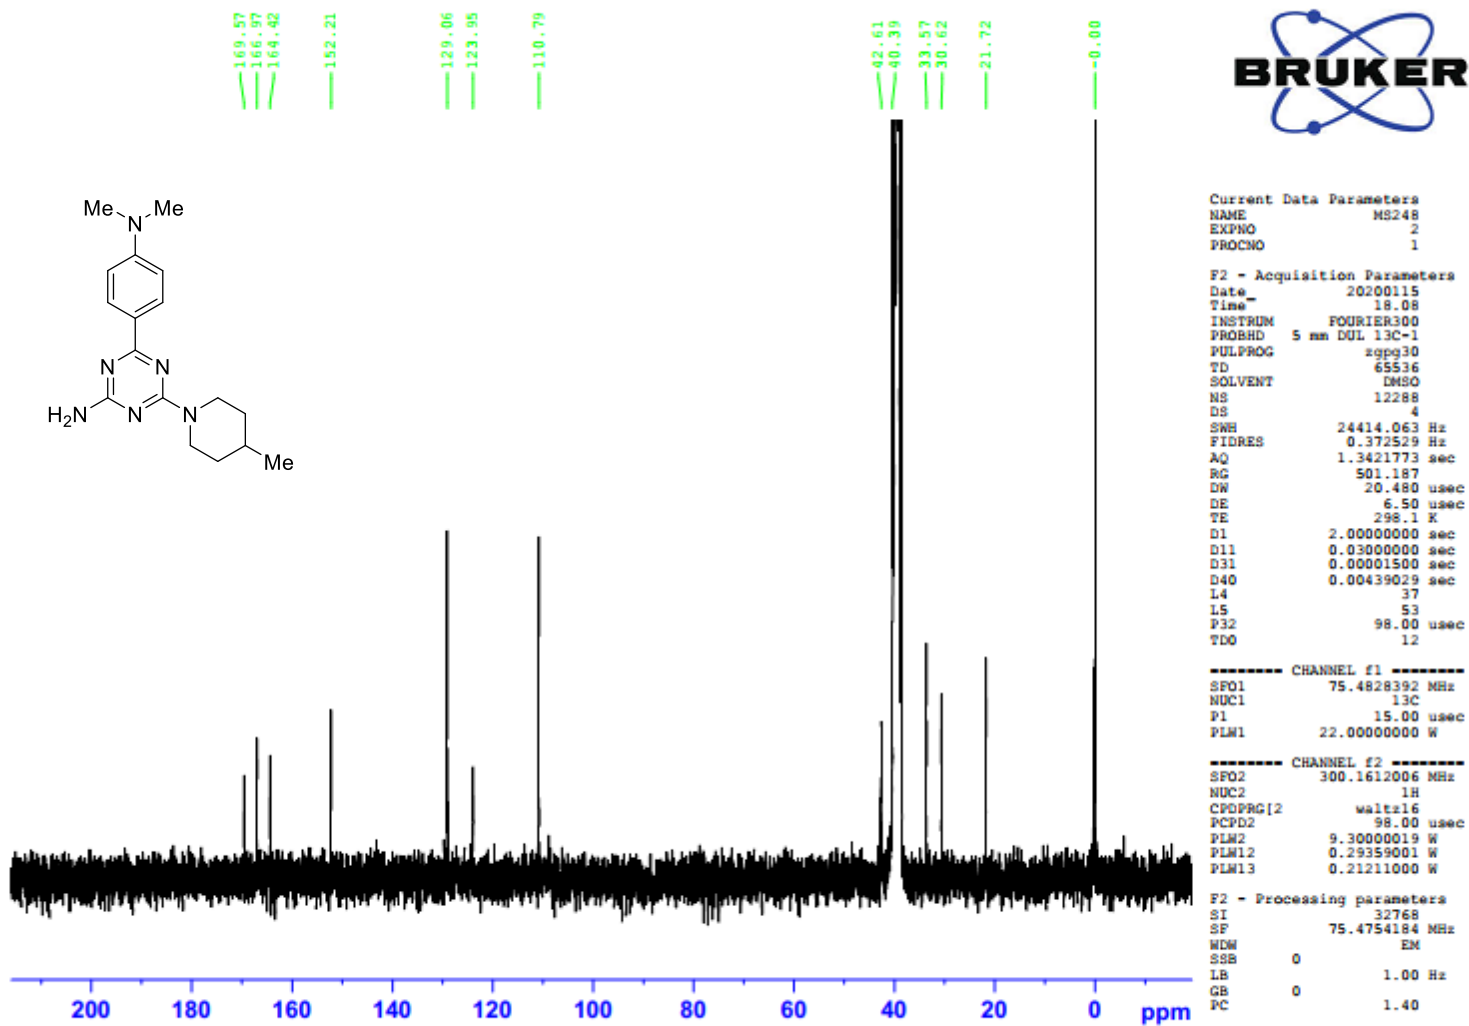

6-(4-Methoxyphenyl)-4-(4-methylpiperidino)-1,3,5-triazine-2-amine (9{3,9})

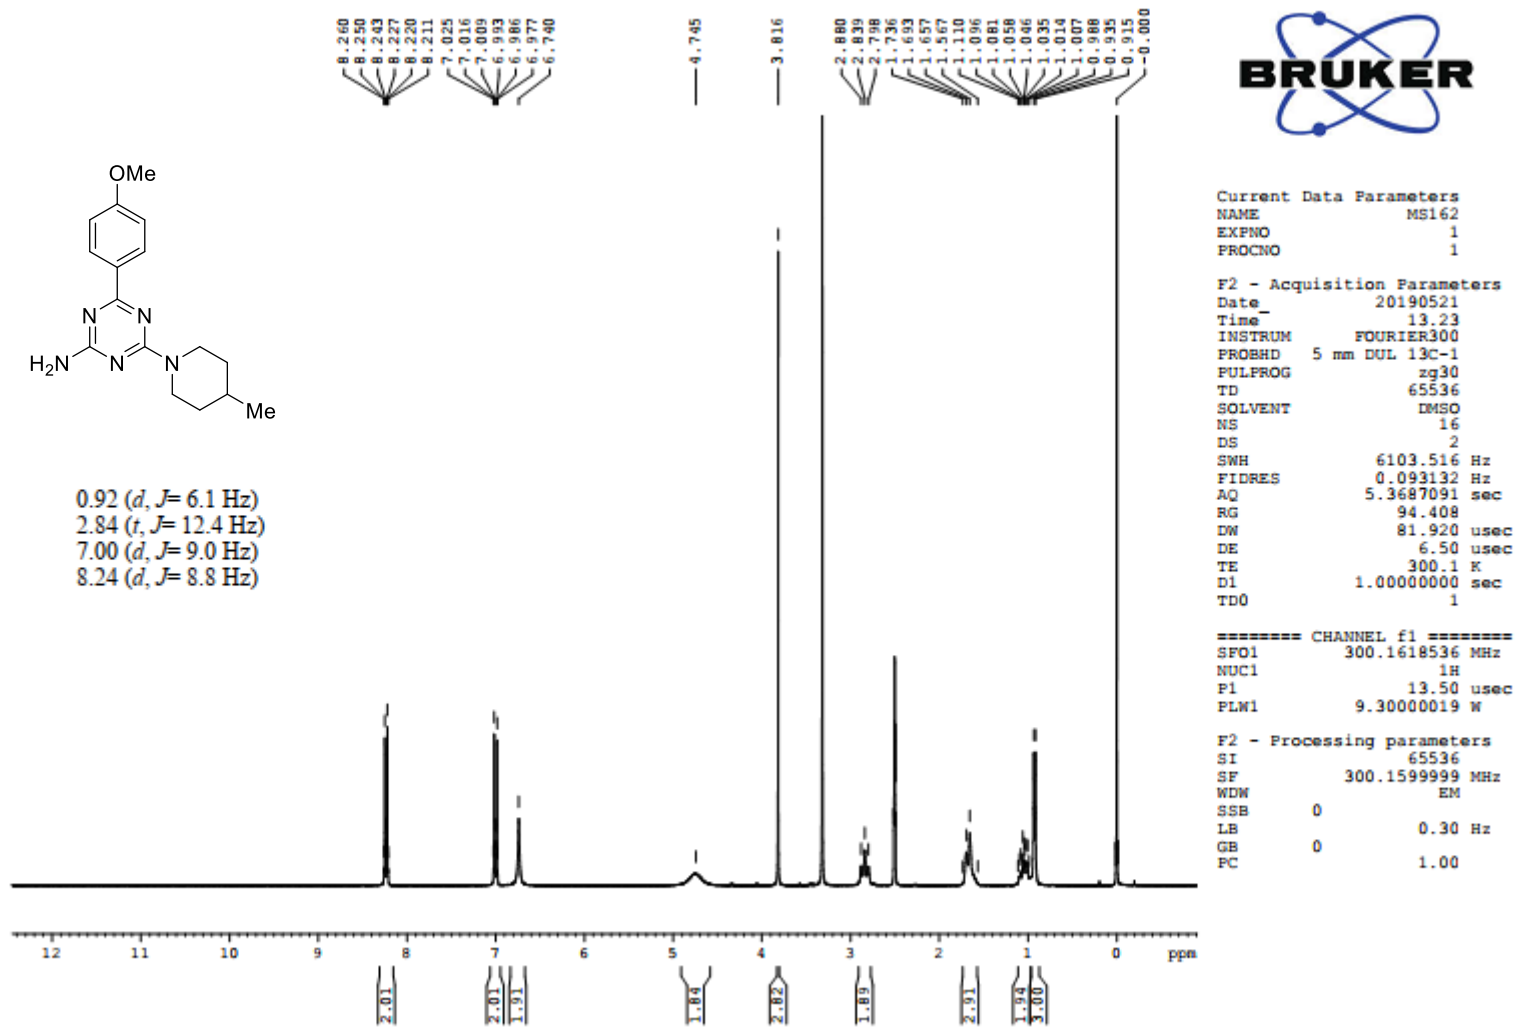



6-(4-Methoxyphenyl)-4-(4-methylpiperidino)-1,3,5-triazine-2-amine (9{3,9})

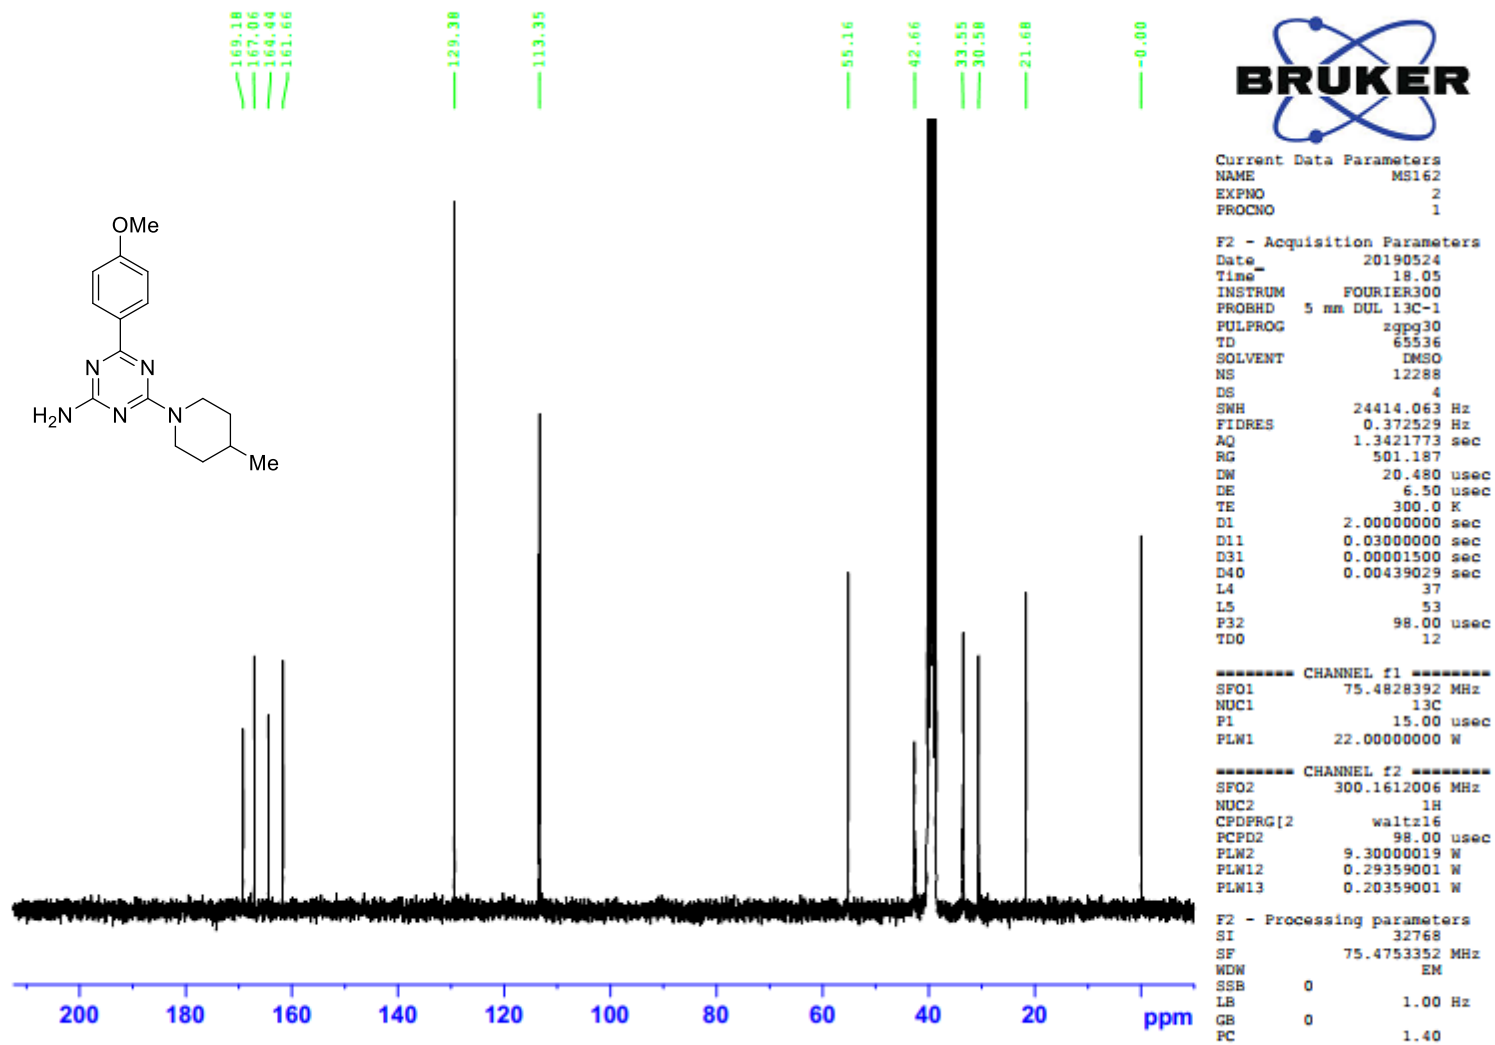

4-(4-Methylpiperidino)-6-(3-nitrophenyl)-1,3,5-triazine-2-amine (9{3,10})

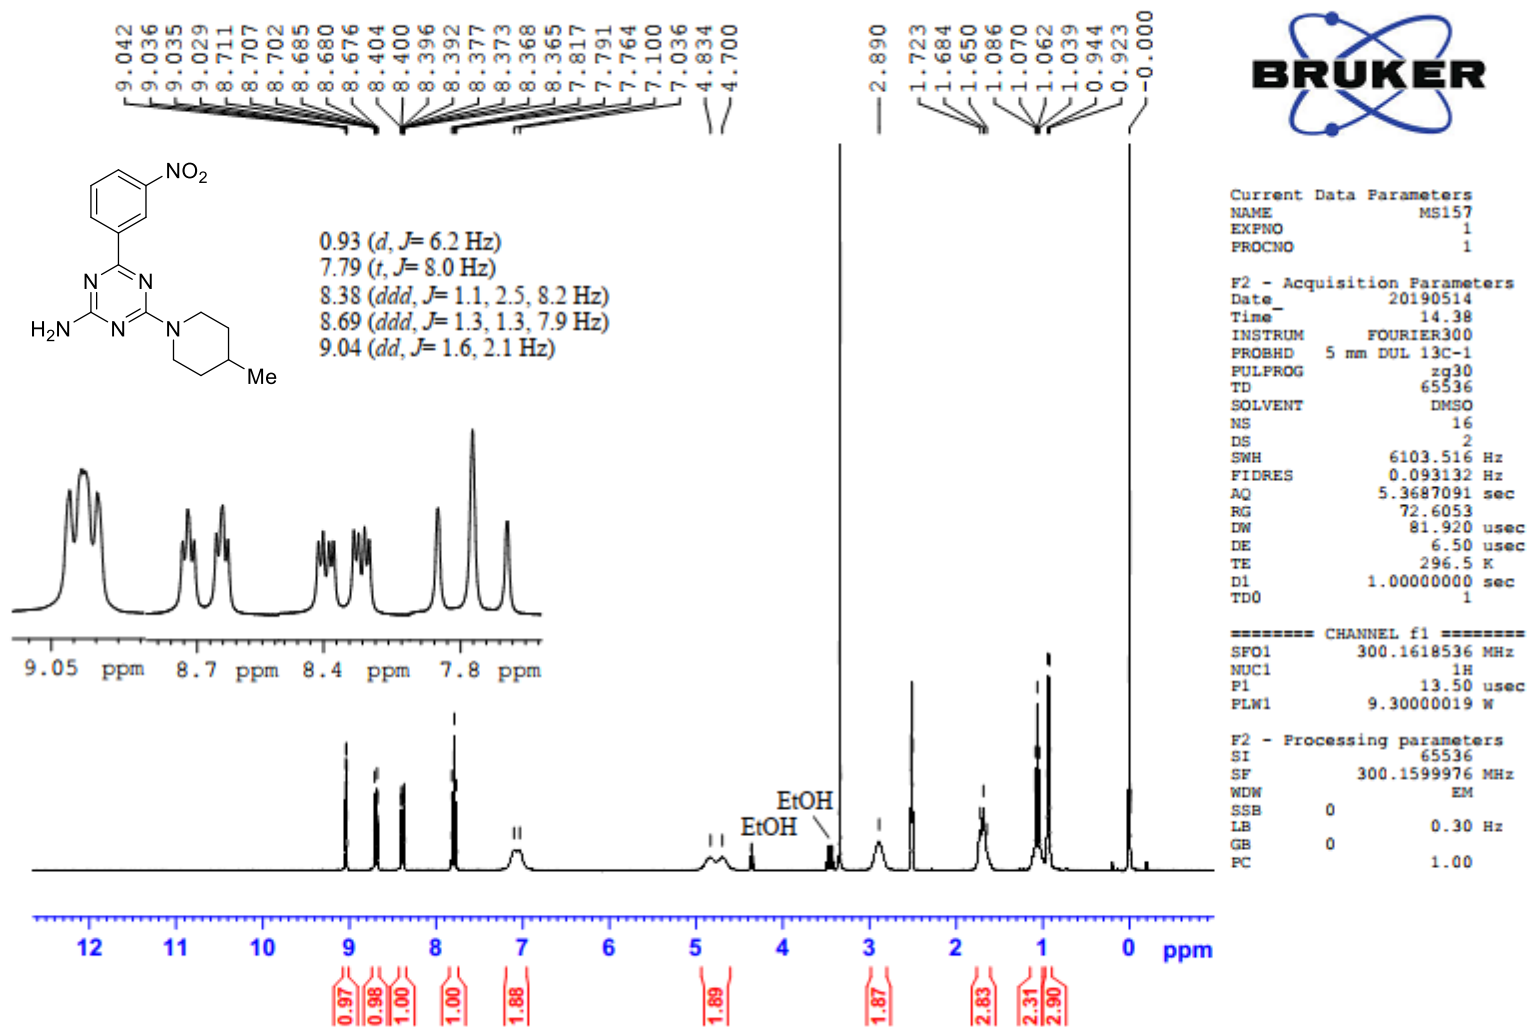

4-(4-Methylpiperidino)-6-(3-nitrophenyl)-1,3,5-triazine-2-amine (9{3,10})

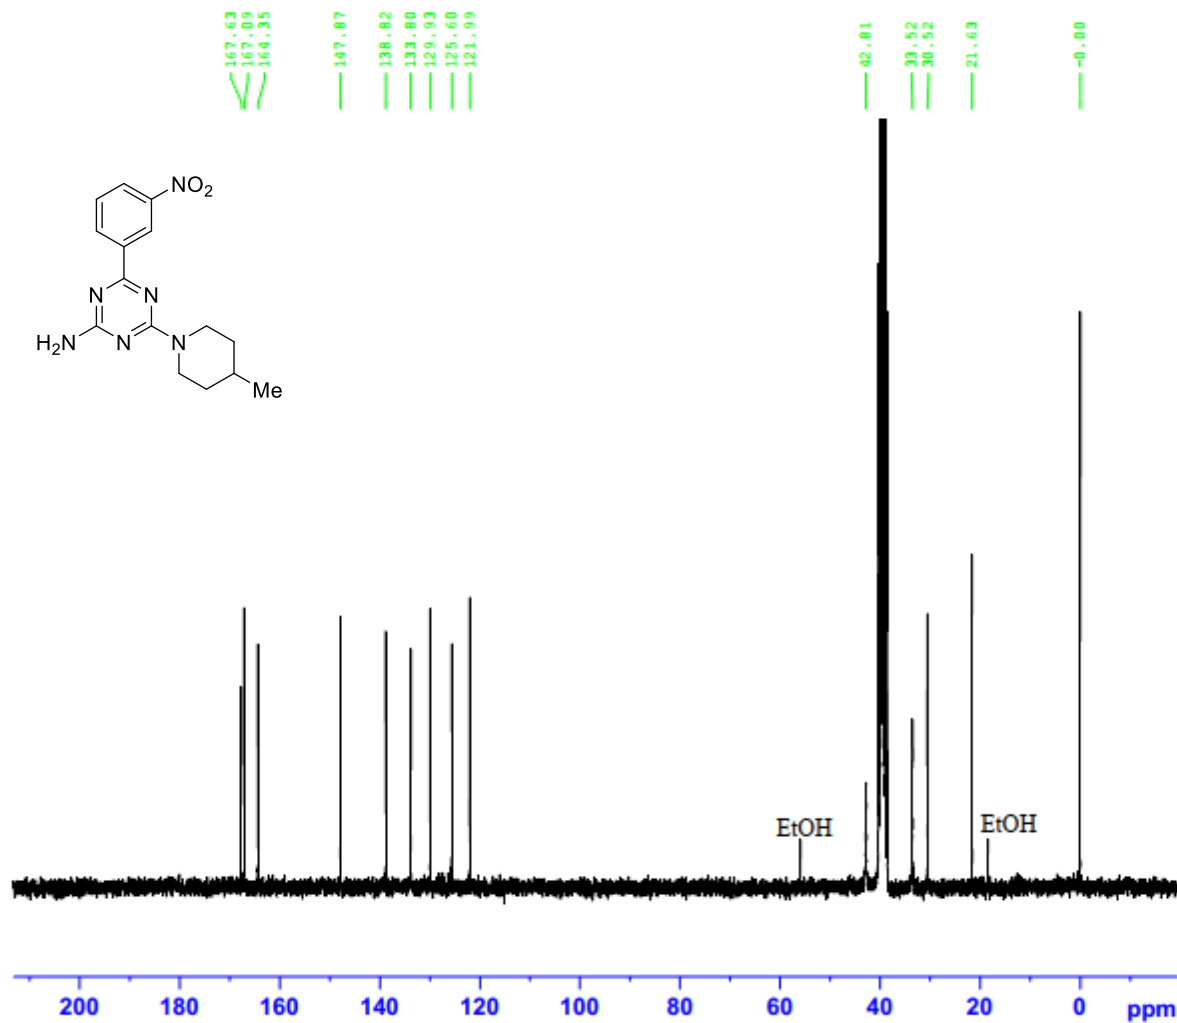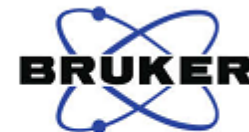

Current Data Parameters  
 NAME MS157  
 EXPNO 2  
 PROCNO 1

F2 - Acquisition Parameters  
 Date\_ 20190518  
 Time 5.48  
 INSTRUM FOURIER300  
 PROBHD 5 mm DDL 13C-1  
 PULPROG zgpg30  
 TD 65536  
 SOLVENT DMSO  
 NS 6144  
 DS 4  
 SWH 24414.063 Hz  
 FIDRES 0.372529 Hz  
 AQ 1.3421773 sec  
 RG 501.187  
 DW 20.480 usec  
 DE 6.50 usec  
 TE 300.1 K  
 D1 2.00000000 sec  
 D11 0.03000000 sec  
 D31 0.00001500 sec  
 D40 0.00439029 sec  
 L4 37  
 L5 53  
 P32 98.00 usec  
 TDO 6

----- CHANNEL f1 -----  
 SFO1 75.4828392 MHz  
 NUC1 13C  
 P1 15.00 usec  
 PLW1 22.00000000 W

----- CHANNEL f2 -----  
 SFO2 300.1612006 MHz  
 NUC2 1H  
 CPDPRG[2] waltz16  
 PCPD2 98.00 usec  
 PLW2 9.30000019 W  
 PLW12 0.29359001 W  
 PLW13 0.20359001 W

F2 - Processing parameters  
 SI 32768  
 SF 75.4753335 MHz  
 WDW EM  
 SSB 0  
 LB 1.00 Hz  
 GB 0  
 PC 1.40

6-[4-(Trifluoromethyl)phenyl]-4-(4-methylpiperidino)-1,3,5-triazine-2-amine (9{3,11})

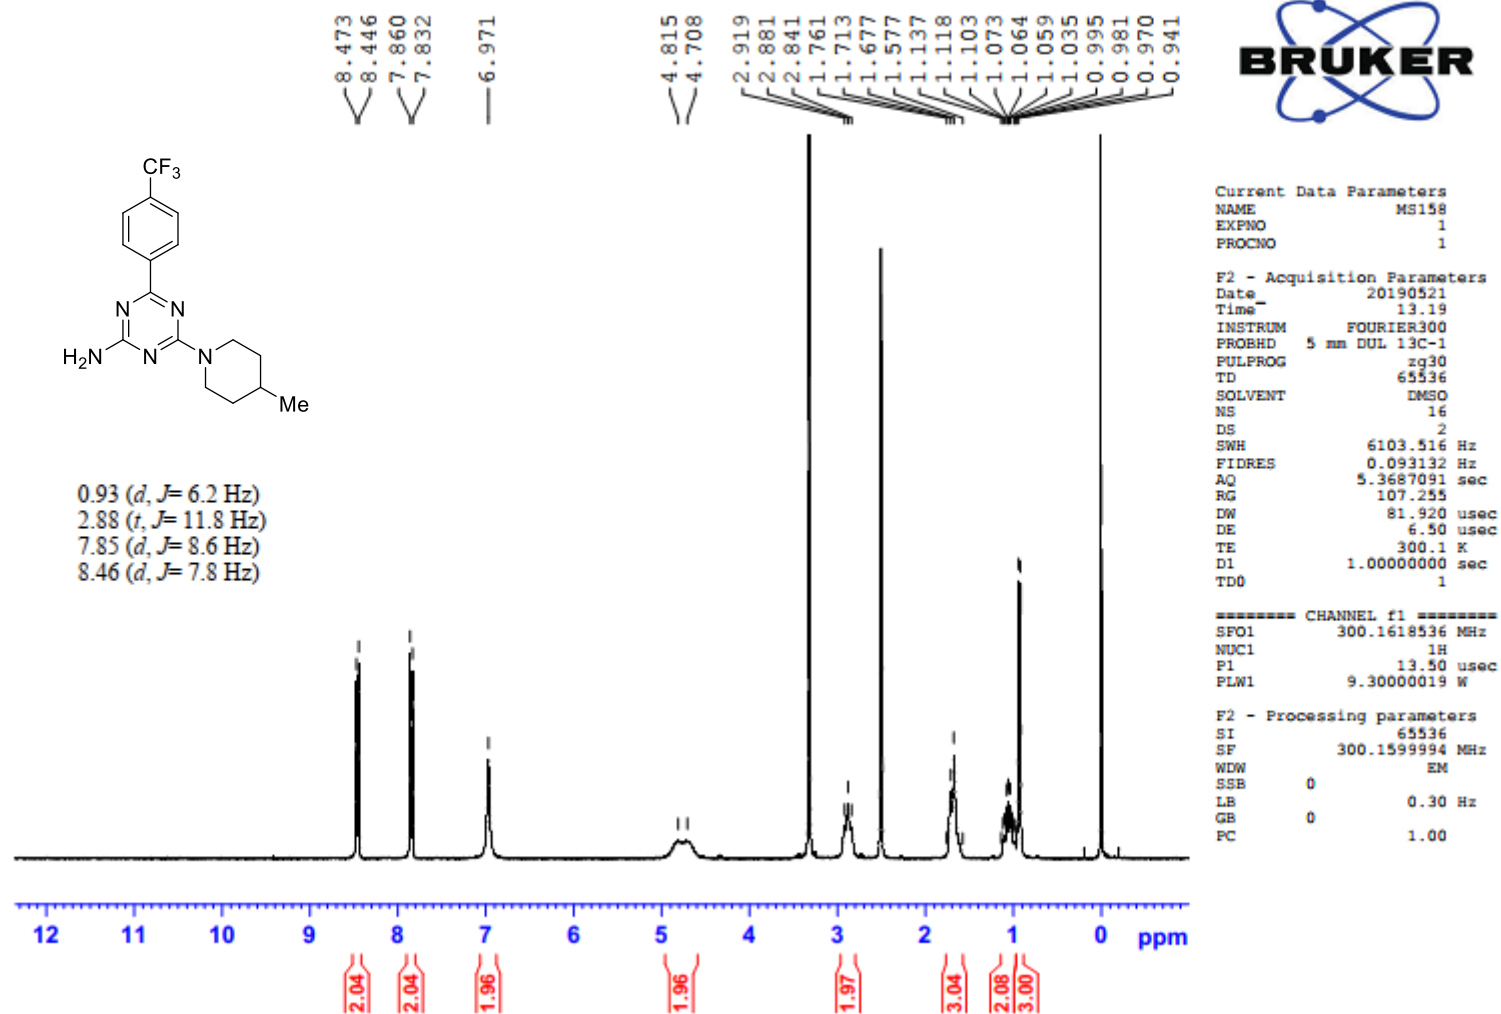

6-[4-(Trifluoromethyl)phenyl]-4-(4-methylpiperidino)-1,3,5-triazine-2-amine (**9**{3,11})

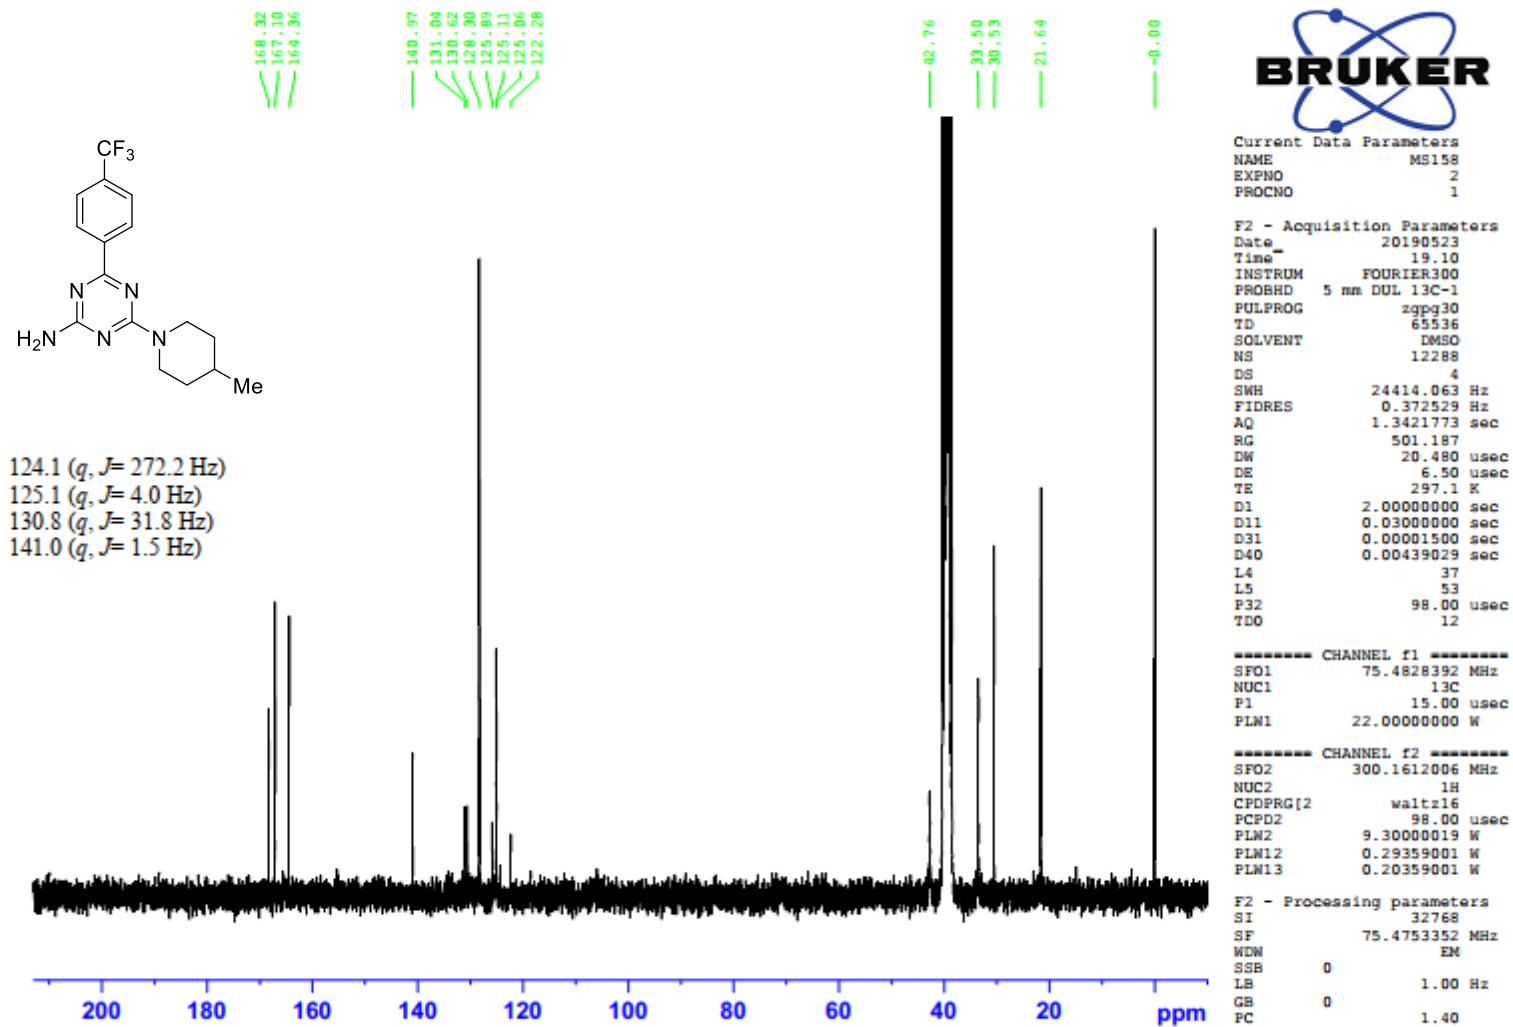

6-[4-(Trifluoromethoxy)phenyl]-4-(4-methylpiperidino)-1,3,5-triazine-2-amine (**9**{3,12})

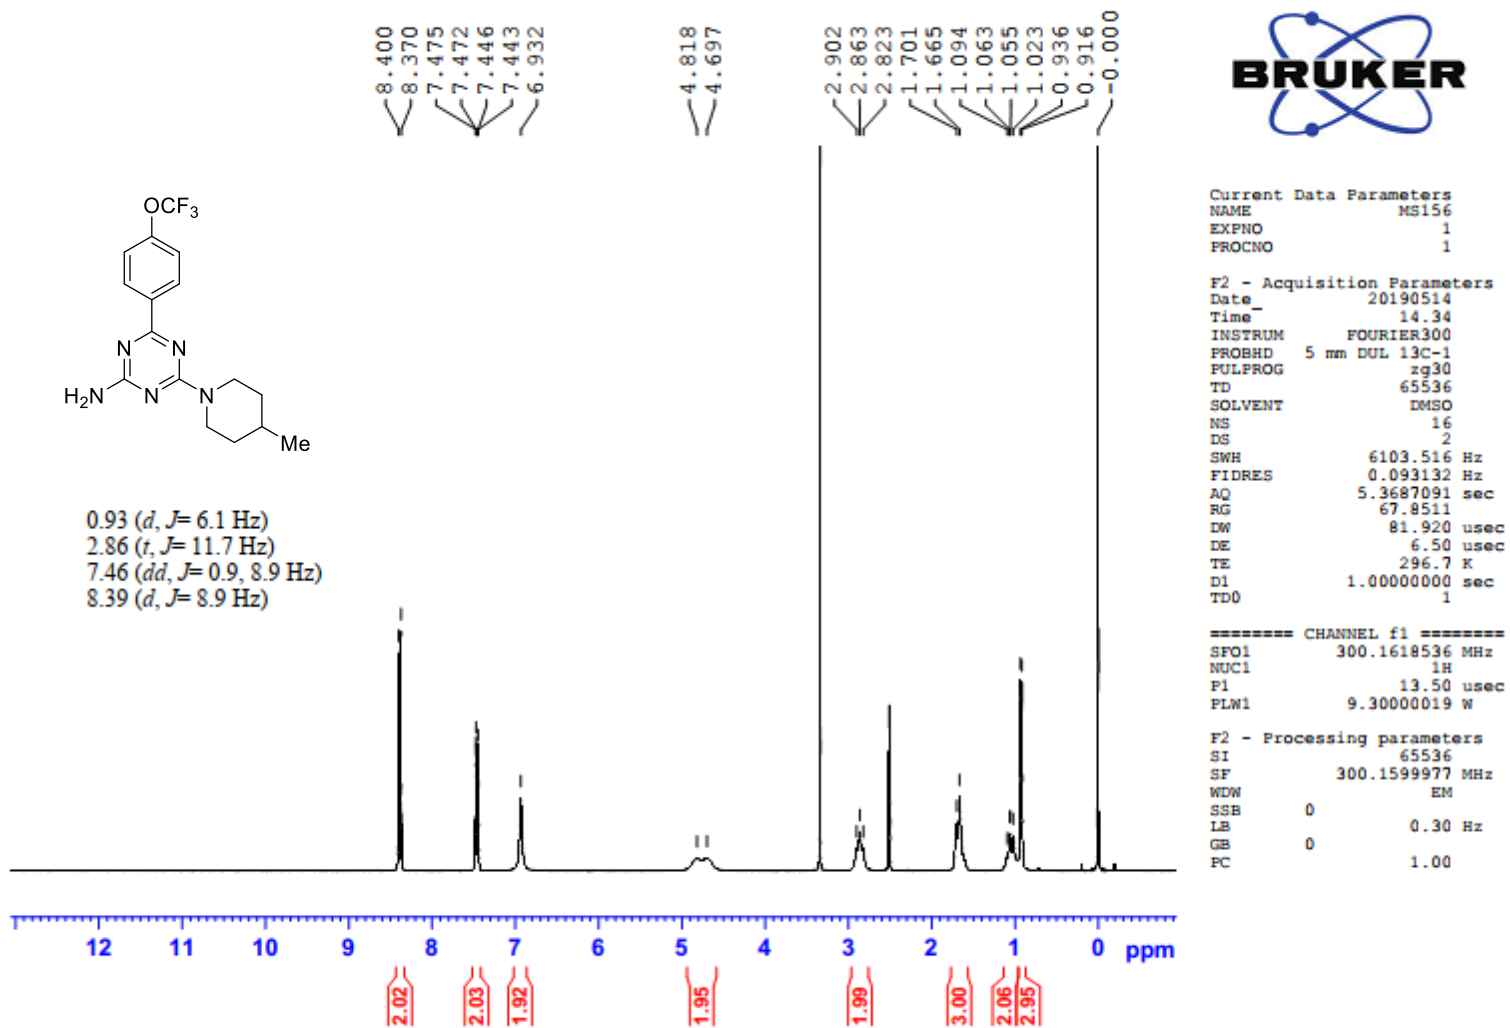

6-[4-(Trifluoromethoxy)phenyl]-4-(4-methylpiperidino)-1,3,5-triazine-2-amine (9{3,12})

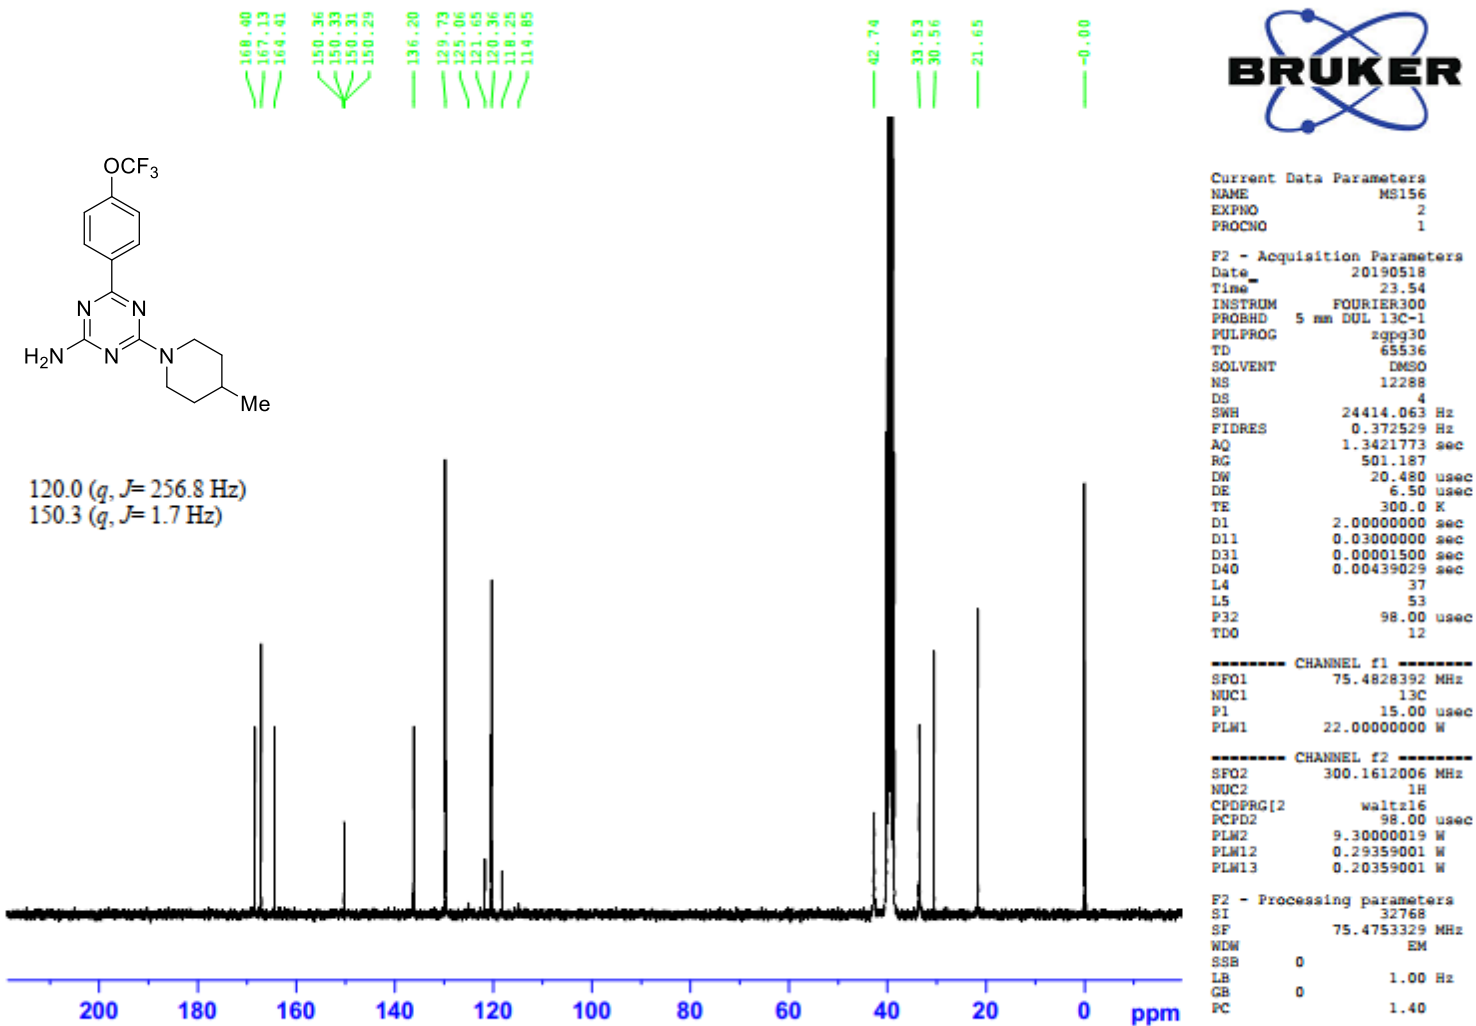

6-(3,4,5-Trimethoxyphenyl)-4-(4-methylpiperidino)-1,3,5-triazine-2-amine (9{3,17})

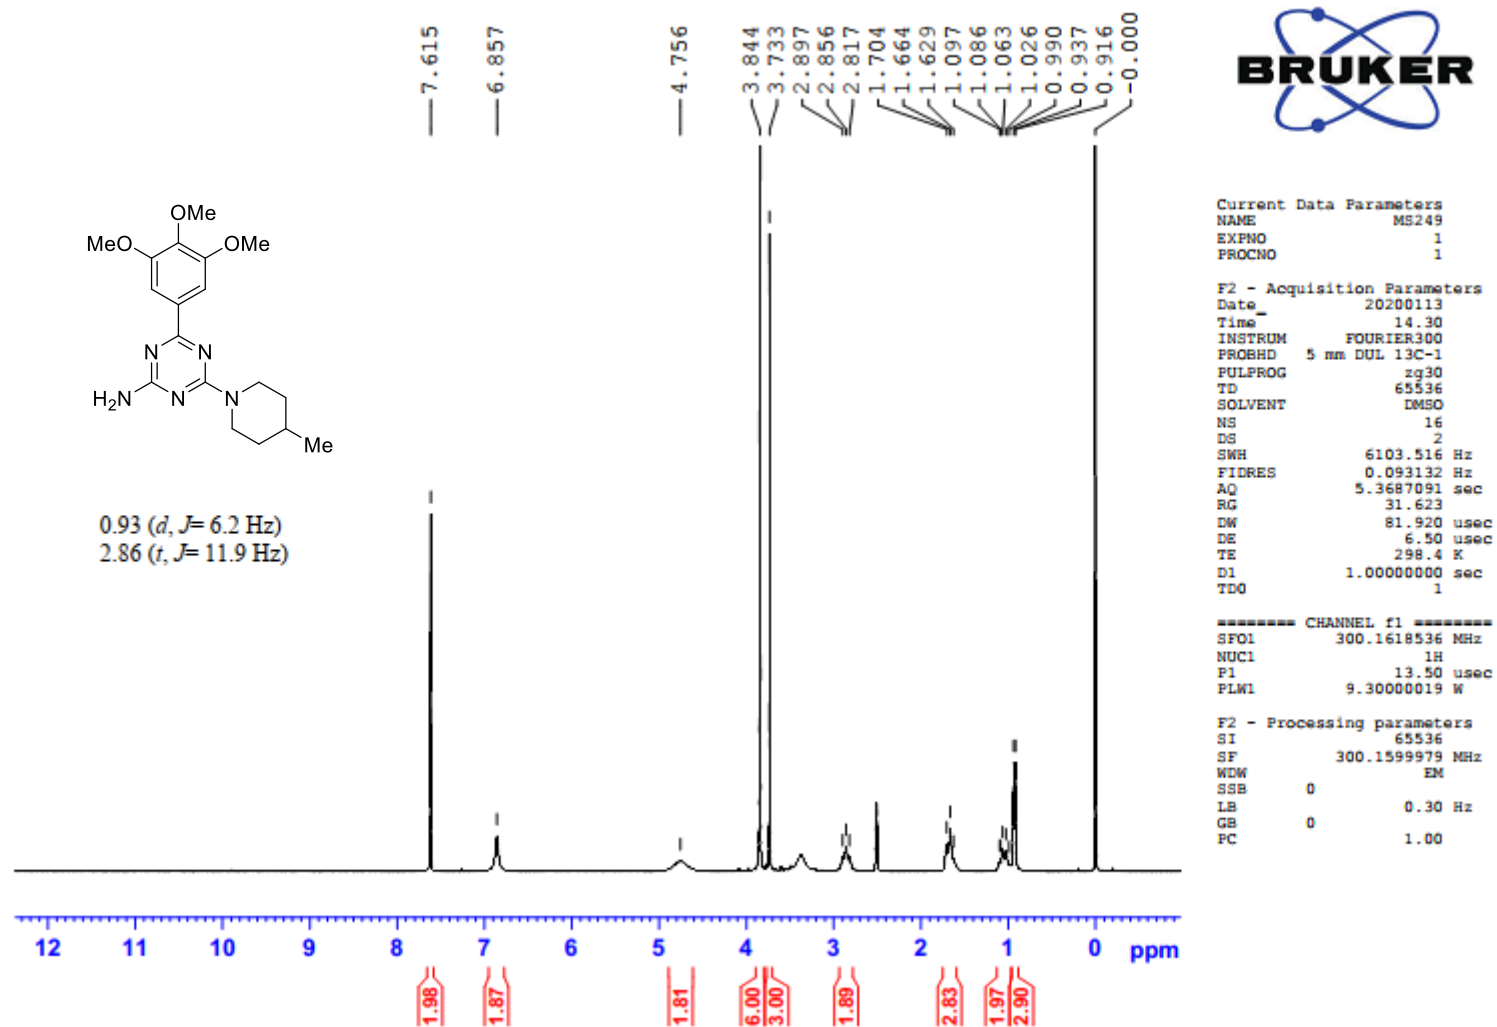



6-(3,4,5-Trimethoxyphenyl)-4-(4-methylpiperidino)-1,3,5-triazine-2-amine (9{3,17})

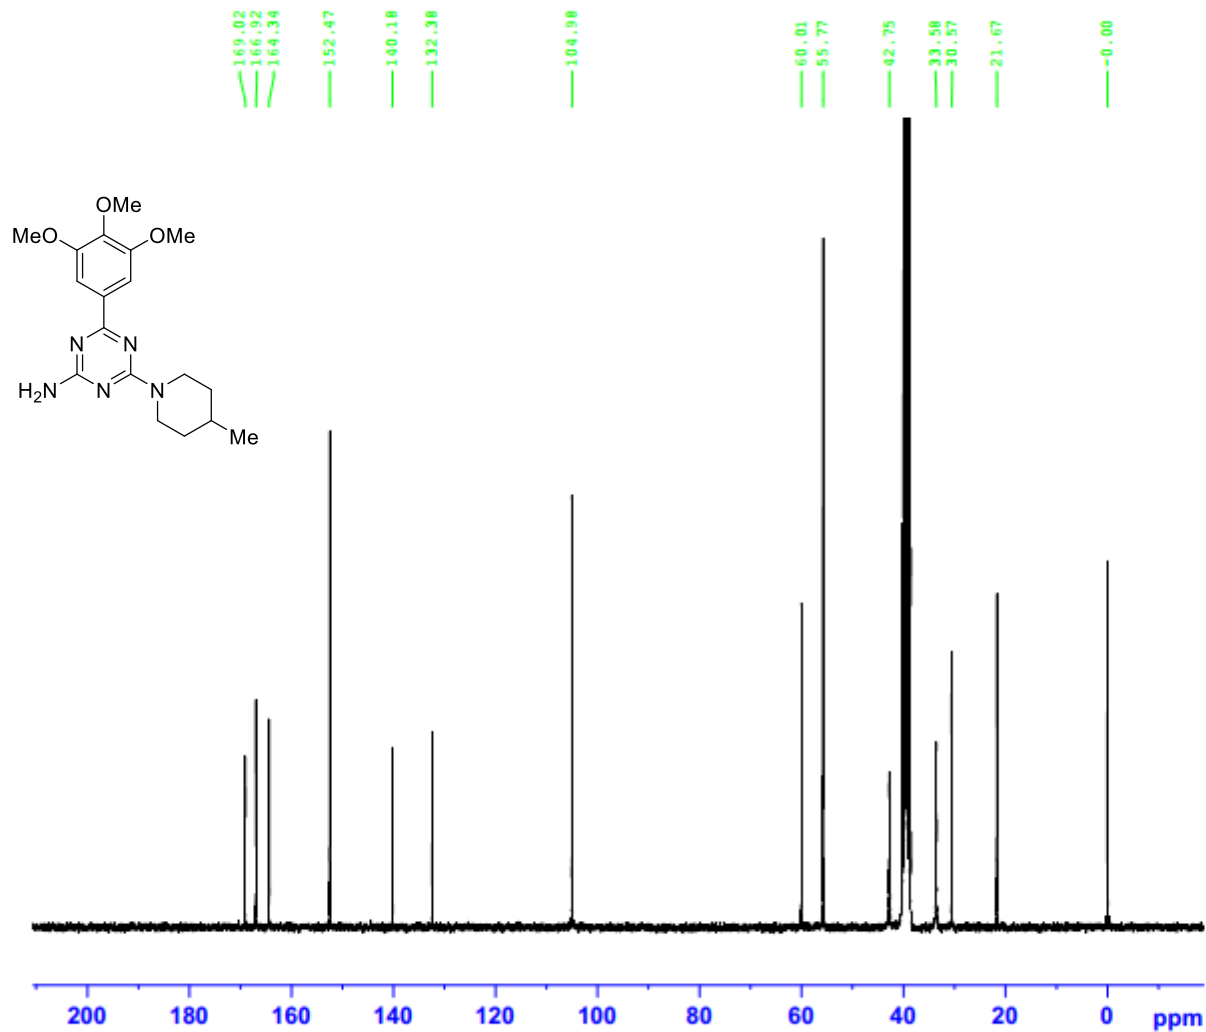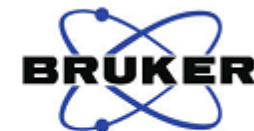

Current Data Parameters  
NAME MS249  
EXPNO 2  
PROCNO 1

F2 - Acquisition Parameters  
Date\_ 20200114  
Time 18.05  
INSTRUM FOURIER300  
PROBHD 5 mm DUL 13C-1  
PULPROG zgpg30  
TD 65536  
SOLVENT DMSO  
NS 12288  
DS 4  
SWH 24414.063 Hz  
FIDRES 0.372529 Hz  
AQ 1.3421773 sec  
RG 501.187  
RC 501.187  
RW 20.480 usec  
DE 6.50 usec  
TE 298.1 K  
D1 2.00000000 sec  
D11 0.03000000 sec  
D31 0.00001500 sec  
D40 0.00439029 sec  
I4 37  
I5 53  
P32 98.00 usec  
TDO 12

----- CHANNEL f1 -----  
SFO1 75.4828392 MHz  
NUC1 13C  
P1 15.00 usec  
PLW1 22.00000000 W

----- CHANNEL f2 -----  
SFO2 300.1612006 MHz  
NUC2 1H  
PCPDPRG[2] waltz16  
PCPD2 98.00 usec  
PLW2 9.30000019 W  
PLW12 0.29359001 W  
PLW13 0.21211000 W

F2 - Processing parameters  
SI 32768  
SF 75.4753335 MHz  
WDW EM  
SSB 0  
LB 1.00 Hz  
CB 0  
PC 1.40

4-(4-Methylpiperidino)-6-(2-thienyl)-1,3,5-triazine-2-amine (9{3,18})

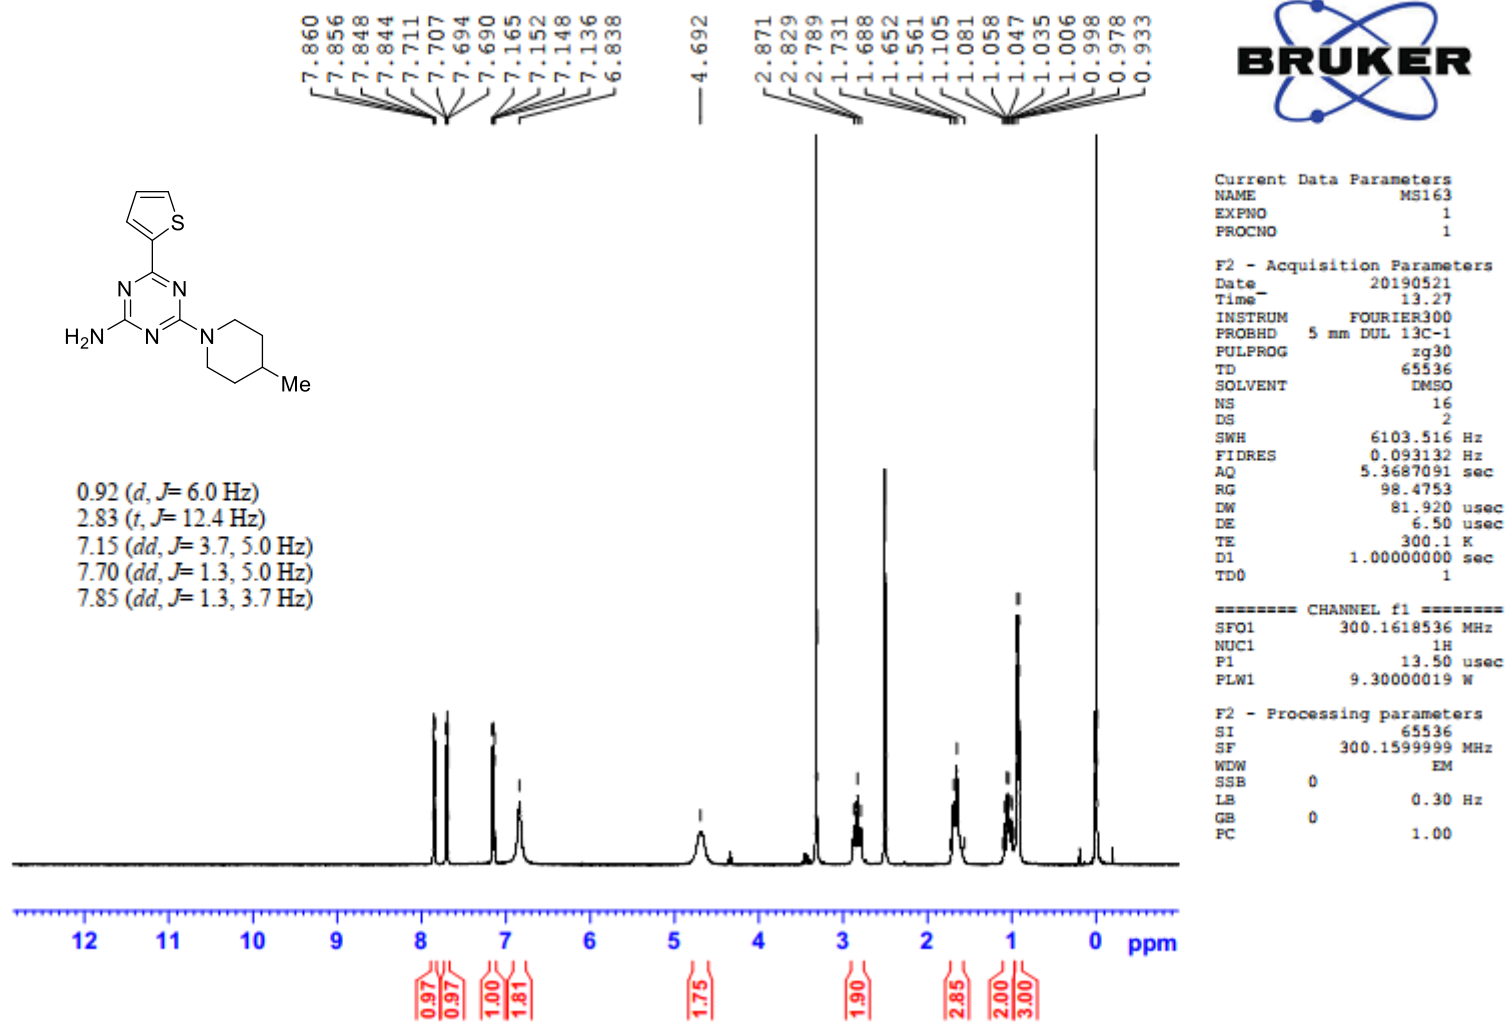

4-(4-Methylpiperidino)-6-(2-thienyl)-1,3,5-triazine-2-amine (9{3,18})

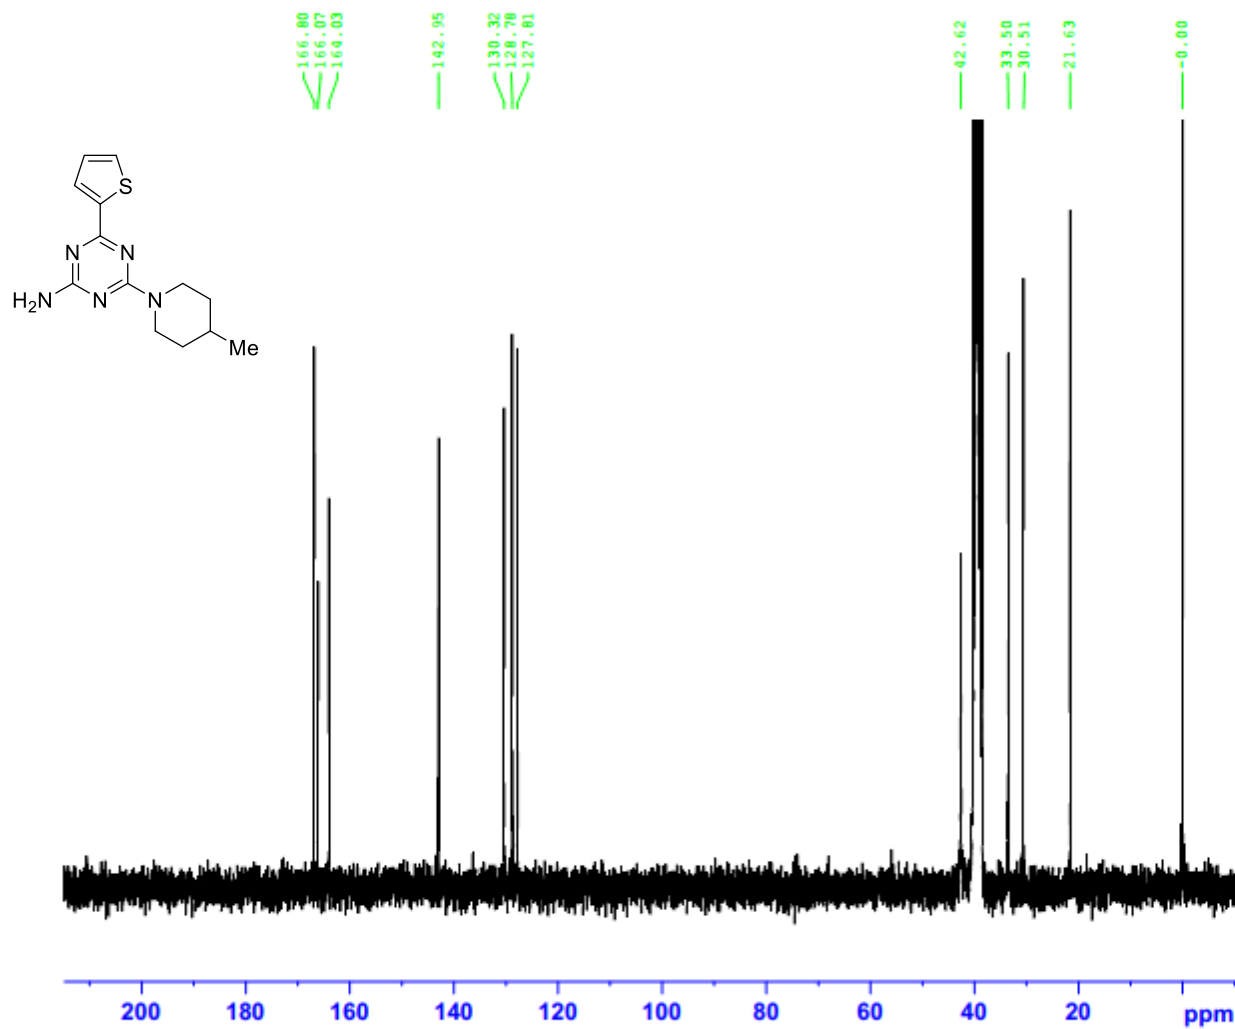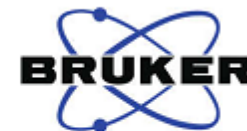

Current Data Parameters  
 NAME MS163  
 EXPNO 2  
 PROCNO 1

F2 - Acquisition Parameters  
 Date\_ 20190525  
 Time 5.44  
 INSTRUM FOURIER300  
 PROBHD 5 mm DUL 13C-1  
 PULPROG zgpg30  
 TD 65536  
 SOLVENT DMSO  
 NS 12288  
 DS 4  
 SWH 24414.063 Hz  
 FIDRES 0.372529 Hz  
 AQ 1.3421773 sec  
 RG 501.187  
 DW 20.480 usec  
 DE 6.50 usec  
 TE 300.0 K  
 D1 2.00000000 sec  
 D11 0.03000000 sec  
 D31 0.00001500 sec  
 D40 0.00439029 sec  
 L4 37  
 L5 53  
 P32 98.00 usec  
 TDO 12

----- CHANNEL f1 -----  
 SFO1 75.4828392 MHz  
 NUC1 13C  
 P1 15.00 usec  
 PLW1 22.00000000 W

----- CHANNEL f2 -----  
 SFO2 300.1612006 MHz  
 NUC2 1H  
 CPDPRG[2] waltz16  
 PCPD2 98.00 usec  
 PLW2 9.30000019 W  
 PLW12 0.29359001 W  
 PLW13 0.20359001 W

F2 - Processing parameters  
 SI 32768  
 SF 75.4753359 MHz  
 WDW EM  
 SSB 0  
 LB 1.00 Hz  
 GB 0  
 PC 1.40

6-(3-Fluorophenyl)-4-(4-methylpiperazino)-1,3,5-triazine-2-amine (9{4,2})

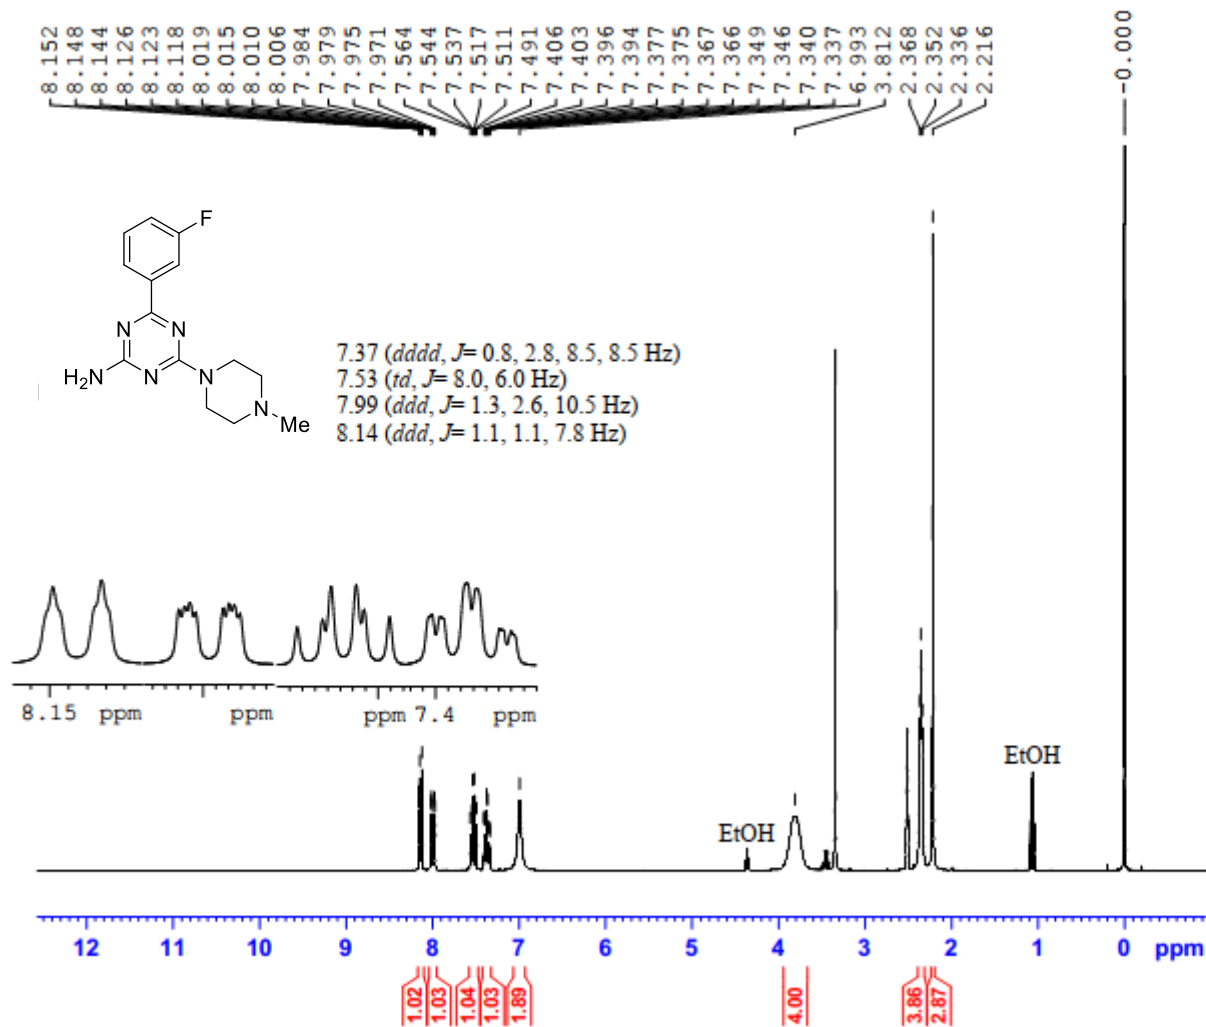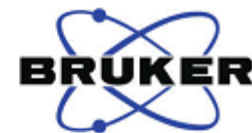

Current Data Parameters  
 NAME MS352  
 EXPNO 1  
 PROCNO 1

F2 - Acquisition Parameters  
 Date\_ 20191206  
 Time 14.34  
 INSTRUM FOURIER300  
 PROBHD 5 mm DUL 13C-1  
 PULPROG zg30  
 TD 65536  
 SOLVENT DMSO  
 NS 16  
 DS 2  
 SMH 6103.516 Hz  
 FIDRES 0.093132 Hz  
 AQ 5.3687091 sec  
 RG 31.623  
 DW 81.920 usec  
 DE 6.50 usec  
 TE 297.7 K  
 D1 1.00000000 sec  
 TD0 1

===== CHANNEL f1 =====  
 SFO1 300.1618536 MHz  
 NUC1 1H  
 P1 13.50 usec  
 PLW1 9.30000019 W

F2 - Processing parameters  
 SI 65536  
 SF 300.1599968 MHz  
 WDW EM  
 SSB 0  
 LB 0.30 Hz  
 GB 0  
 PC 1.00

6-(3-Fluorophenyl)-4-(4-methylpiperazino)-1,3,5-triazine-2-amine (9{4,2})

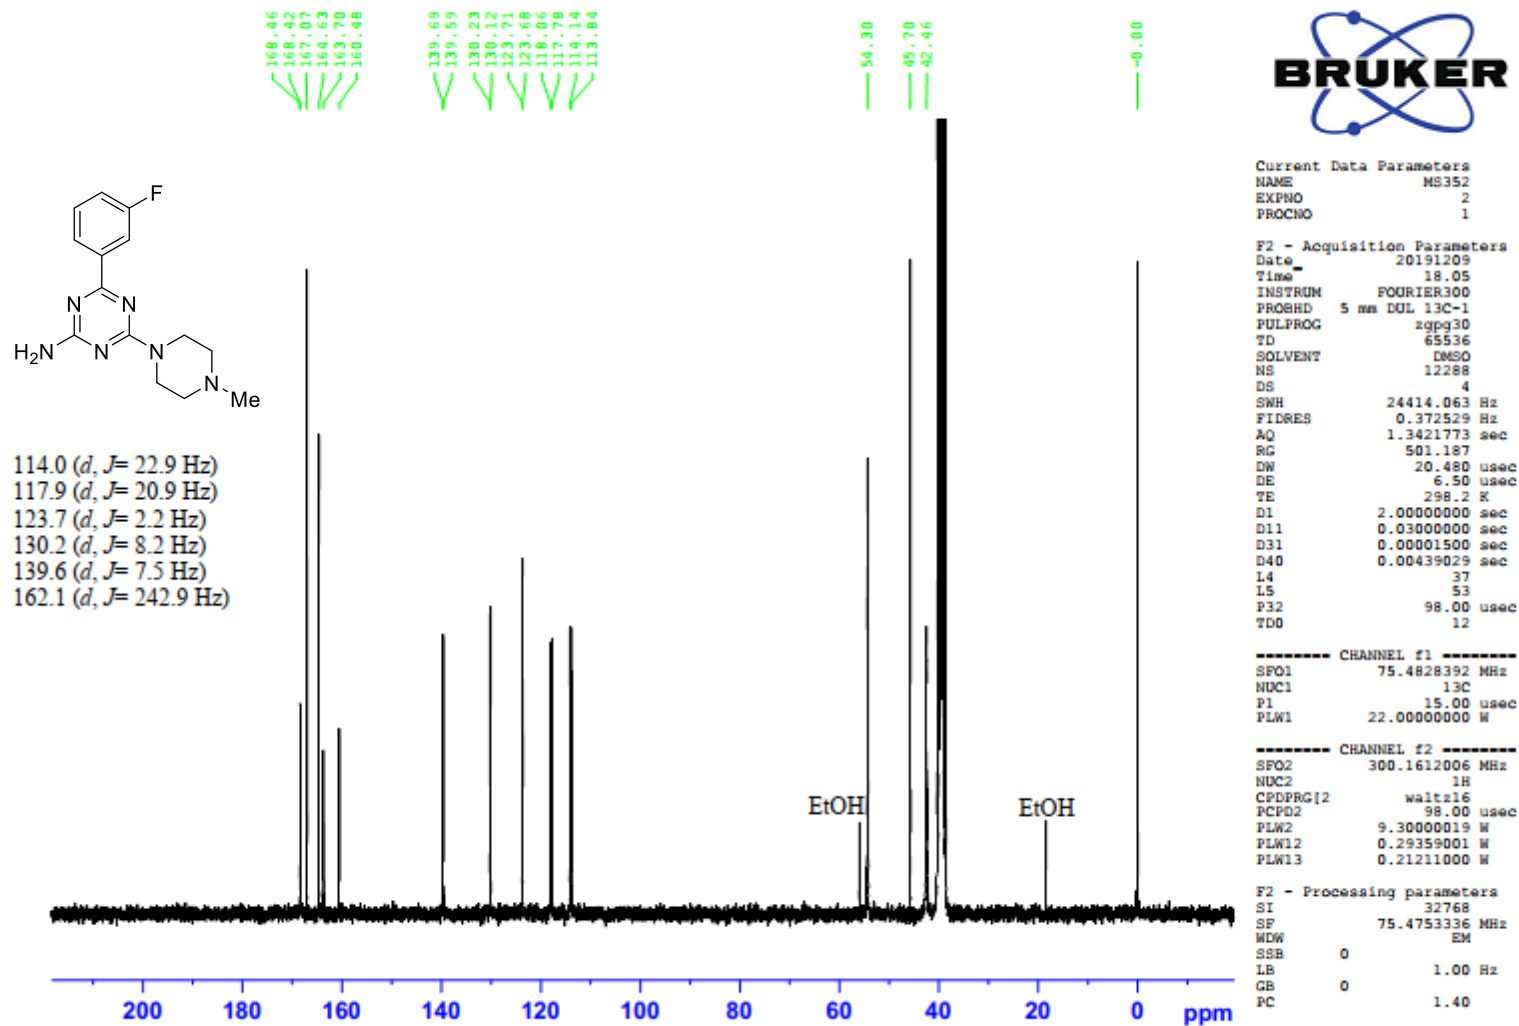

6-(4-Fluorophenyl)-4-(4-methylpiperazino)-1,3,5-triazine-2-amine (9{4,3})

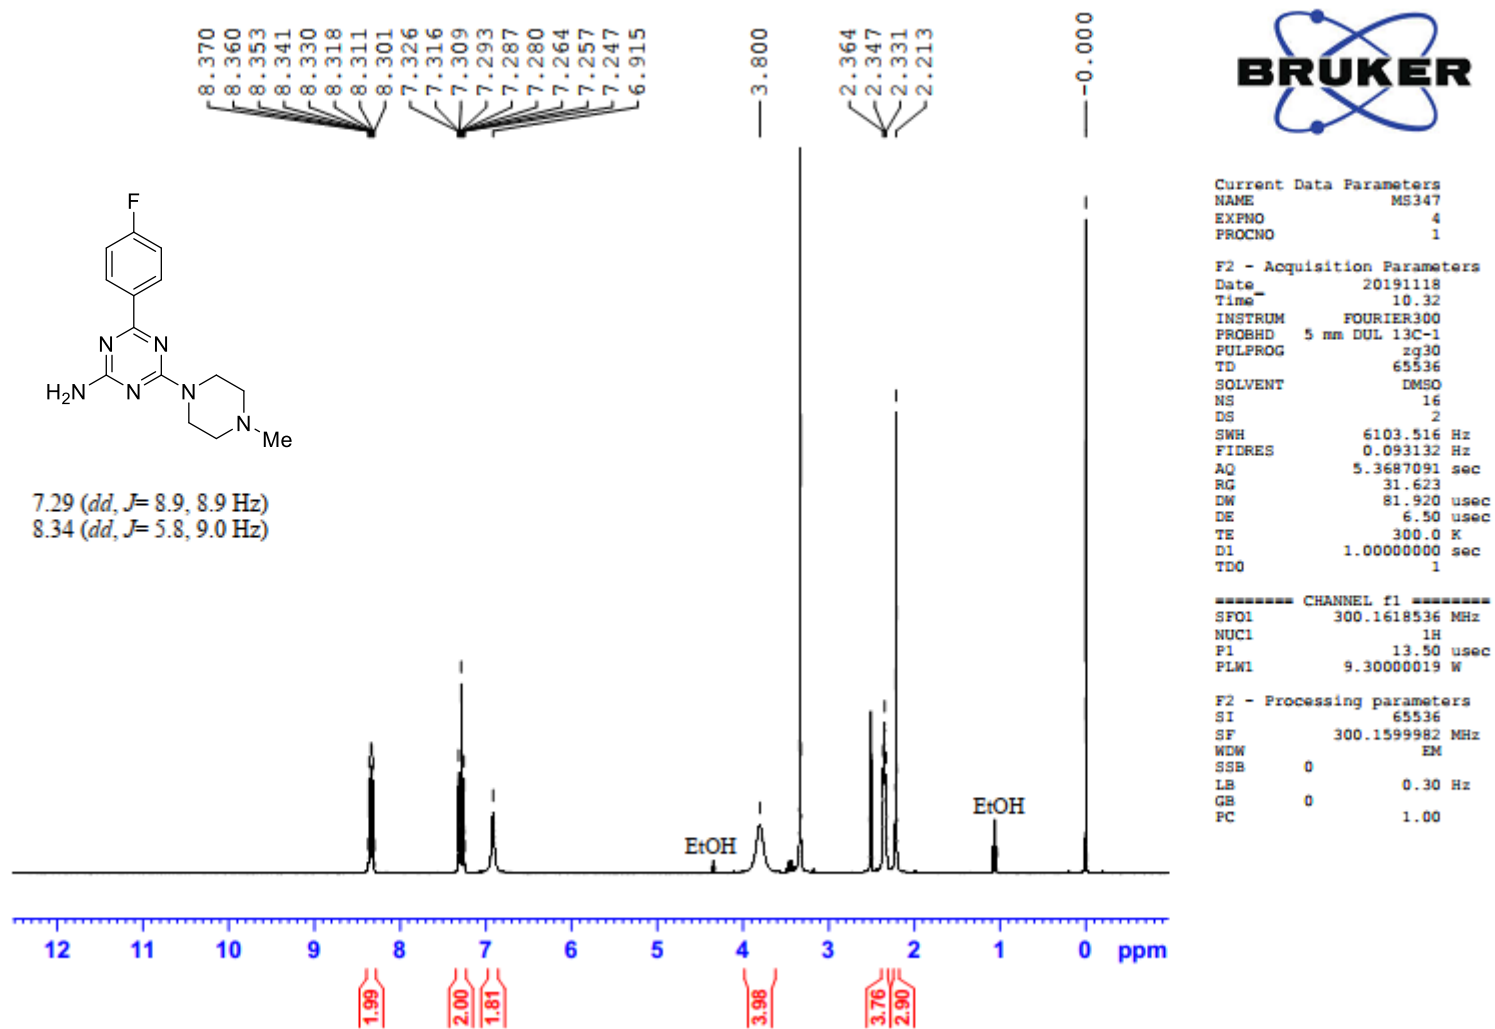

6-(4-Fluorophenyl)-4-(4-methylpiperazino)-1,3,5-triazine-2-amine (9{4,3})

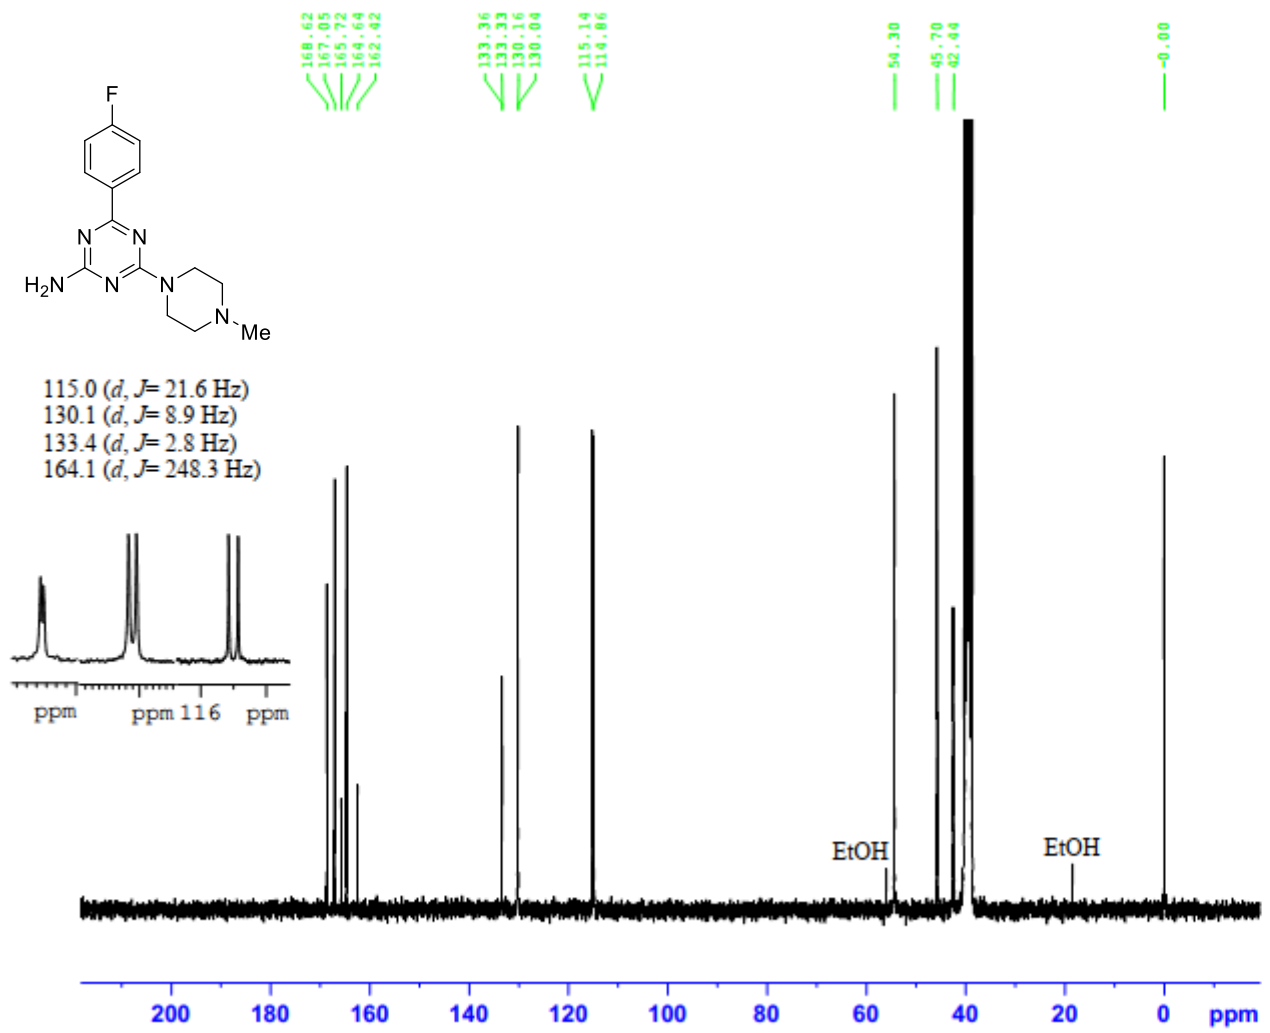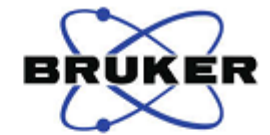

Current Data Parameters  
 NAME MS347  
 EXPNO 3  
 PROCNO 1

F2 - Acquisition Parameters  
 Date\_ 20191115  
 Time 19.29  
 INSTRUM FOURIER300  
 PROBD 5 mm DUL 13C-1  
 PULPROG zgpg30  
 TD 65536  
 SOLVENT DMSO  
 NS 14336  
 DS 4  
 SMH 24414.063 Hz  
 FIDRES 0.372529 Hz  
 AQ 1.3421773 sec  
 RG 501.187  
 DM 20.480 usec  
 DE 6.50 usec  
 TE 300.1 K  
 D1 2.00000000 sec  
 D11 0.03000000 sec  
 D31 0.00001500 sec  
 D40 0.00439029 sec  
 L4 37  
 L5 53  
 P32 98.00 usec  
 TD0 14

----- CHANNEL f1 -----  
 SFO1 75.4828392 MHz  
 NUC1 13C  
 P1 15.00 usec  
 PLW1 22.00000000 W

----- CHANNEL f2 -----  
 SFO2 300.1612006 MHz  
 NUC2 1H  
 CPDPRG[2] waltz16  
 PCPD2 98.00 usec  
 PLW2 9.30000019 W  
 PLW12 0.29359001 W  
 PLW13 0.20359001 W

F2 - Processing parameters  
 SI 32768  
 SF 75.4753342 MHz  
 WDW EM  
 SSB 0  
 LB 1.00 Hz  
 GB 0  
 PC 1.40

6-(4-Chlorophenyl)-4-(4-methylpiperazino)-1,3,5-triazine-2-amine (9{4,4})

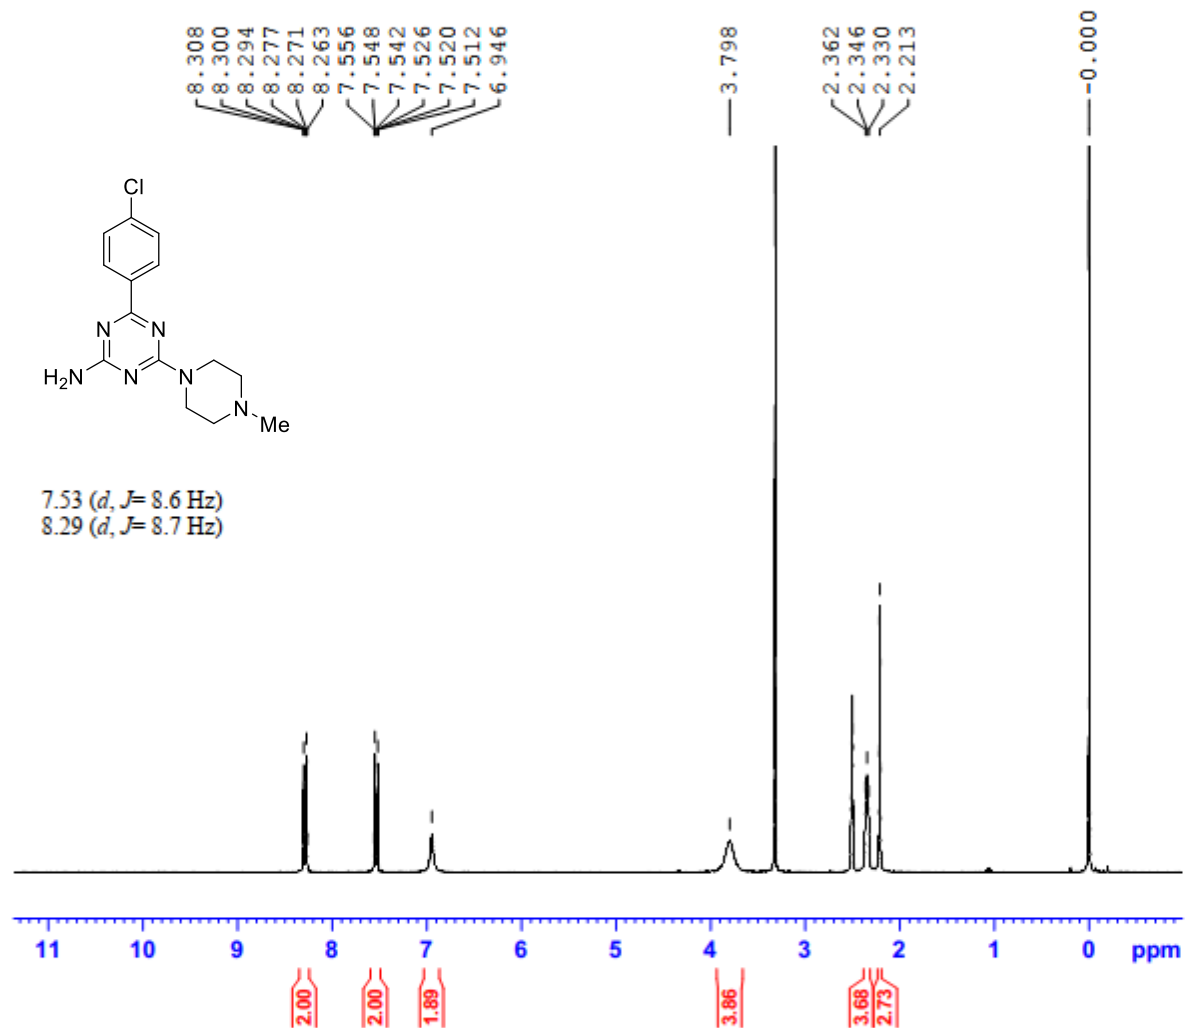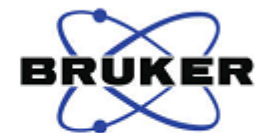

Current Data Parameters  
NAME MS371  
EXPNO 1  
PROCNO 1

F2 - Acquisition Parameters  
Date\_ 20191224  
Time 13.17  
INSTRUM FOURIER300  
PROBHD 5 mm DUL 13C-1  
PULPROG zg30  
TD 65536  
SOLVENT DMSO  
NS 16  
DS 2  
SWH 6103.516 Hz  
FIDRES 0.093132 Hz  
AQ 5.3687091 sec  
RG 80.6524  
DW 81.920 usec  
DE 6.50 usec  
TE 300.0 K  
D1 1.00000000 sec  
TD0 1

===== CHANNEL f1 =====  
SFO1 300.1618536 MHz  
NUC1 1H  
P1 13.50 usec  
PLW1 9.30000019 W

F2 - Processing parameters  
SI 65536  
SF 300.1599991 MHz  
WDW EM  
SSB 0  
LB 0.30 Hz  
GB 0  
PC 1.00



6-(4-Chlorophenyl)-4-(4-methylpiperazino)-1,3,5-triazine-2-amine (9{4,4})

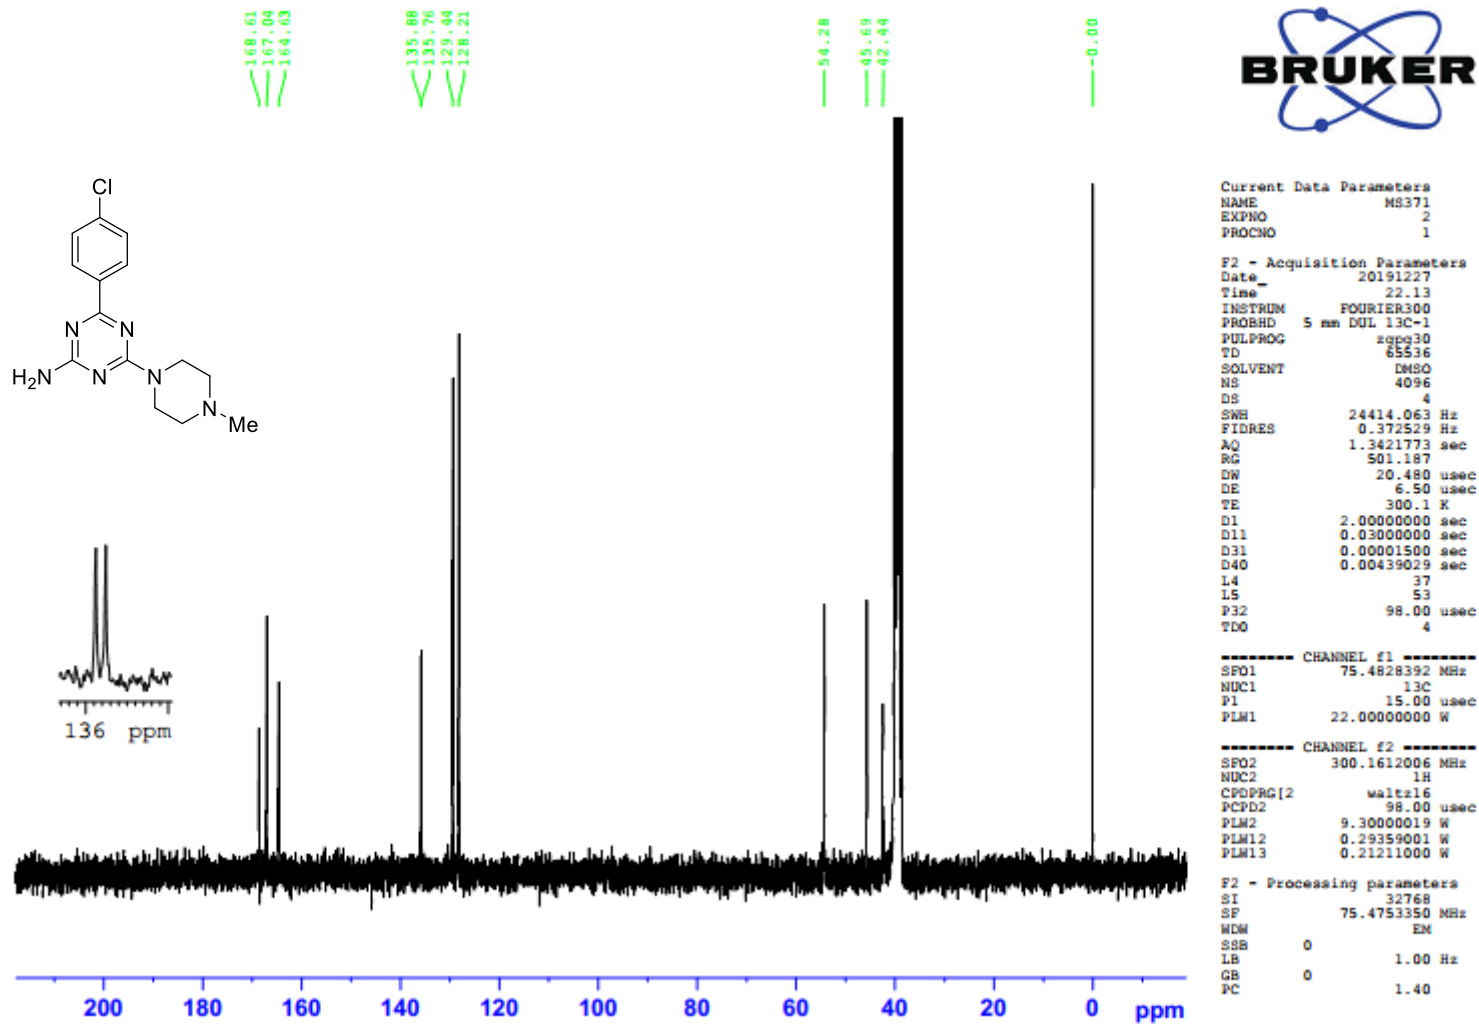

6-(3-Methylphenyl)-4-(4-methylpiperazino)-1,3,5-triazine-2-amine (9{4,5})

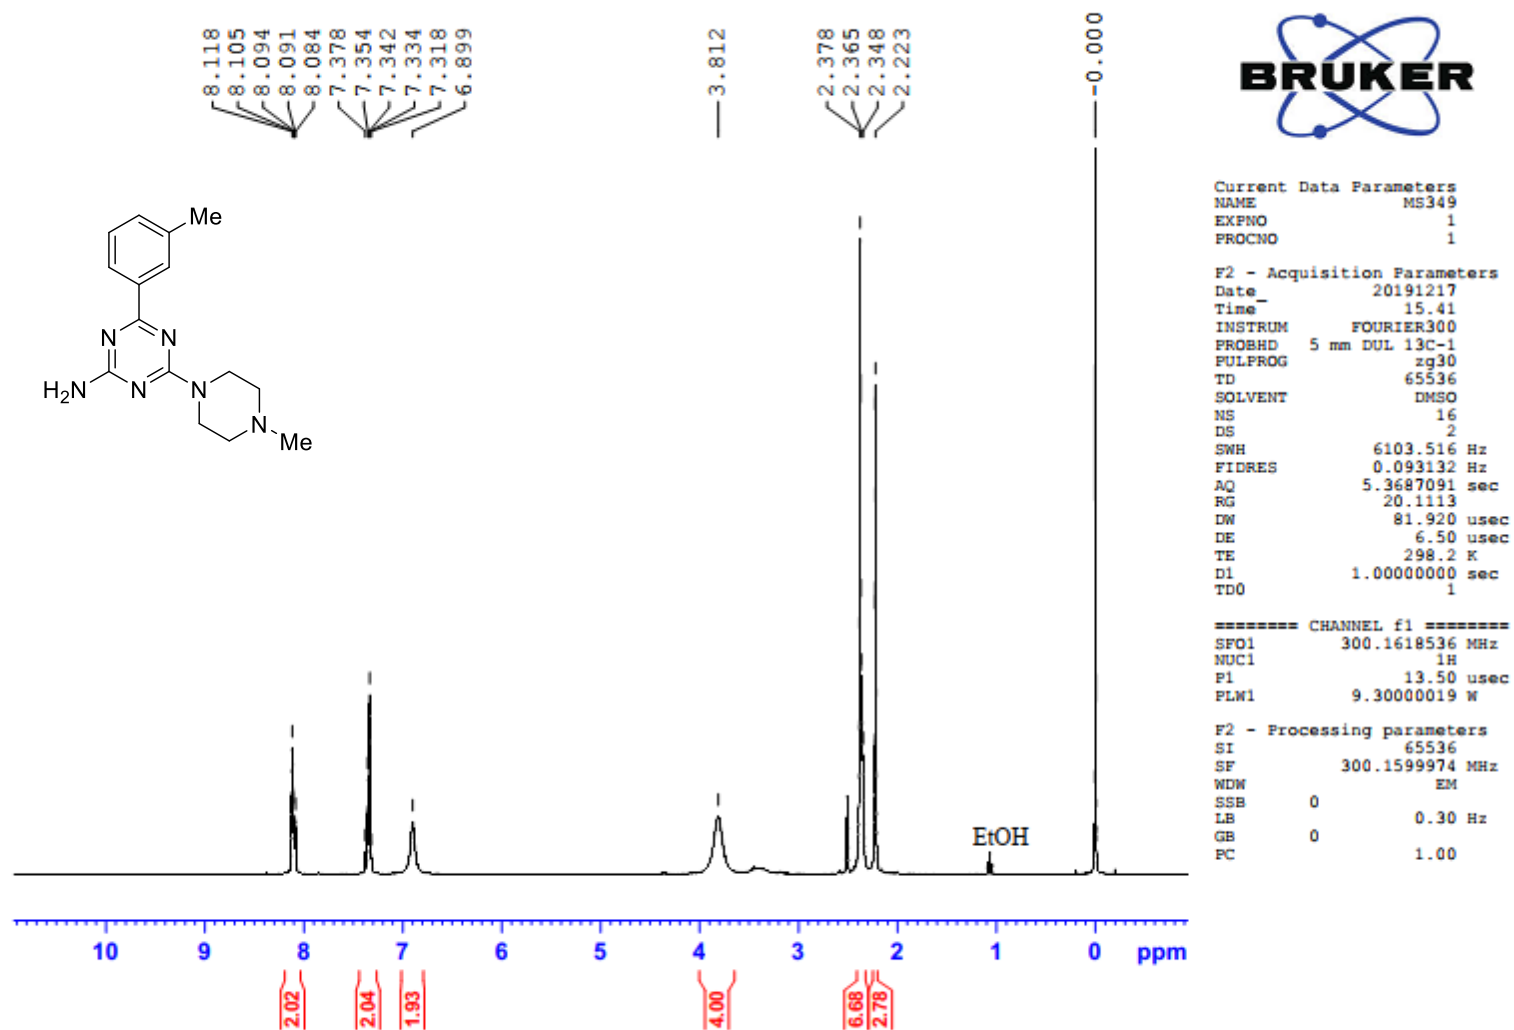

6-(3-Methylphenyl)-4-(4-methylpiperazino)-1,3,5-triazine-2-amine (9{4,5})

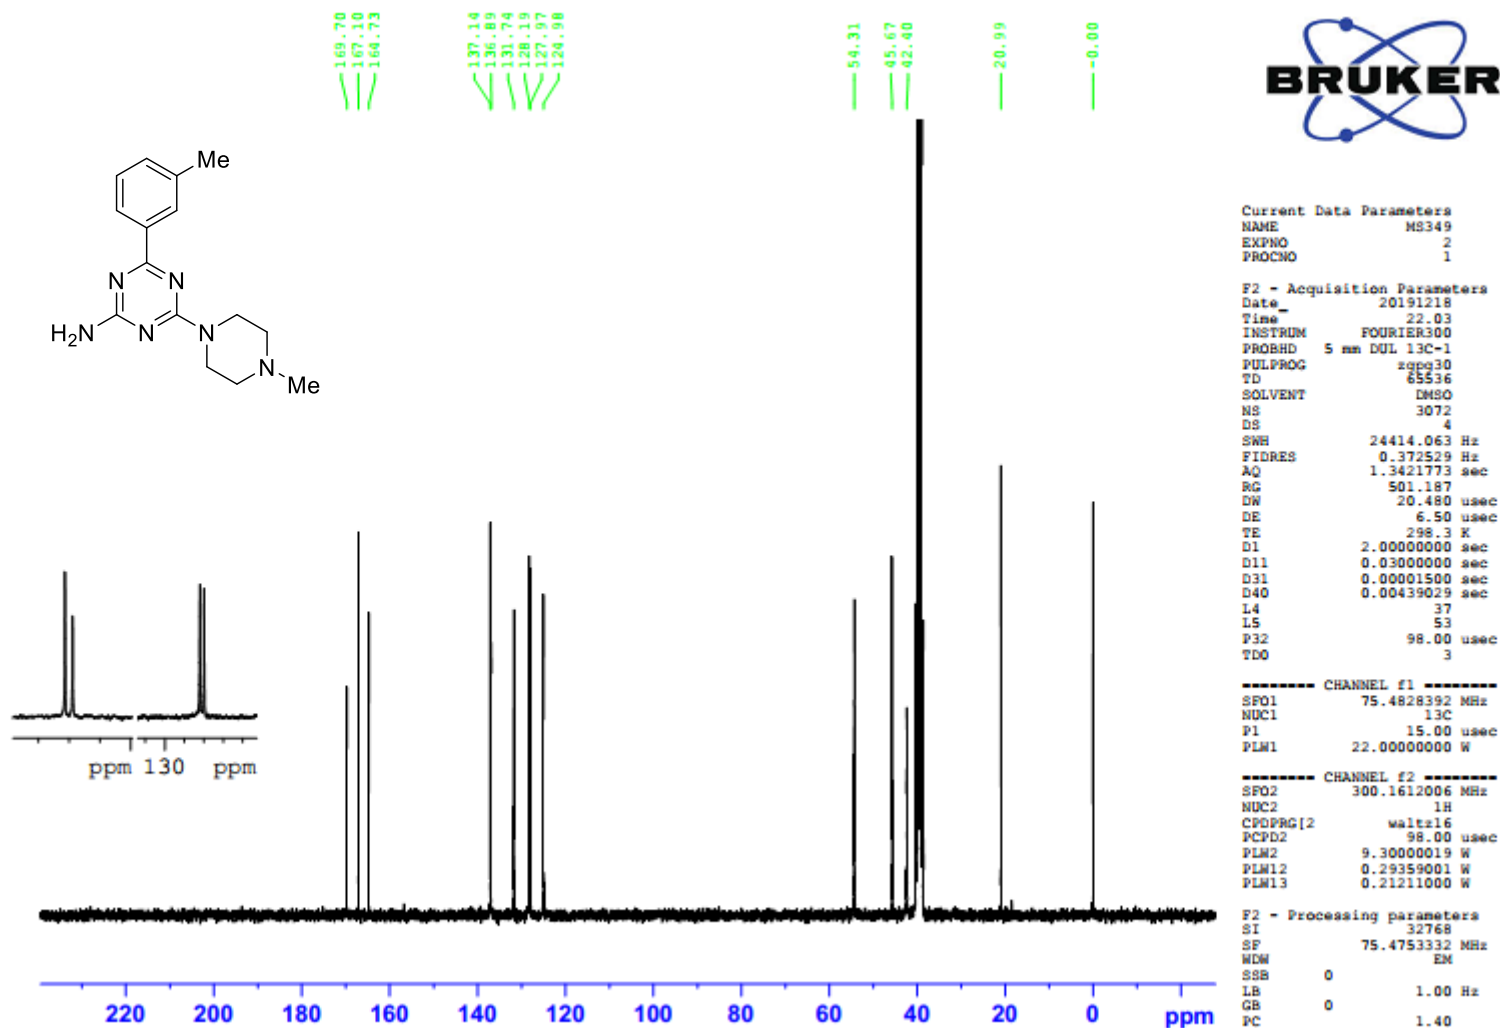

6-(4-Methylphenyl)-4-(4-methylpiperazino)-1,3,5-triazine-2-amine (9{4,6})

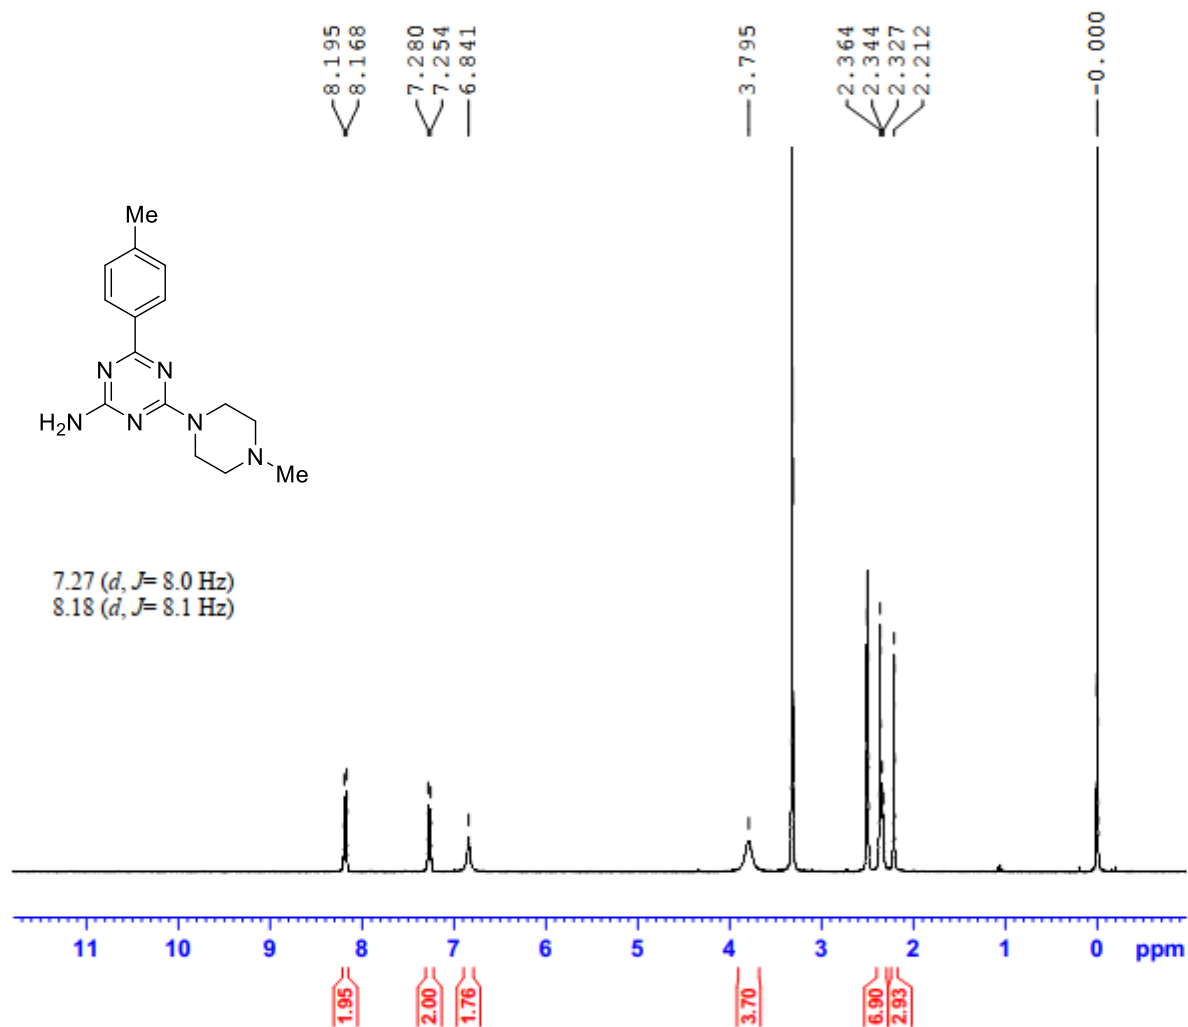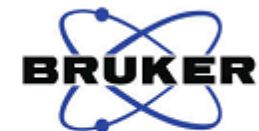

Current Data Parameters  
 NAME MS346  
 EXPNO 3  
 PROCNO 1

F2 - Acquisition Parameters  
 Date 20191114  
 Time 16.12  
 INSTRUM FOURIER300  
 PROBHD 5 mm DUL 13C-1  
 PULPROG zg30  
 TD 65536  
 SOLVENT DMSO  
 NS 16  
 DS 2  
 SWH 6103.516 Hz  
 FIDRES 0.093132 Hz  
 AQ 5.3687091 sec  
 RG 97.6586  
 DW 81.920 usec  
 DE 6.50 usec  
 TE 300.0 K  
 D1 1.00000000 sec  
 TDO 1

===== CHANNEL f1 =====  
 SFO1 300.1618536 MHz  
 NUC1 1H  
 P1 13.50 usec  
 PLW1 9.30000019 W

F2 - Processing parameters  
 SI 65536  
 SF 300.1599997 MHz  
 WDW EM  
 SSB 0  
 LB 0.30 Hz  
 GB 0  
 PC 1.00

6-(4-Methylphenyl)-4-(4-methylpiperazino)-1,3,5-triazine-2-amine (9{4,6})

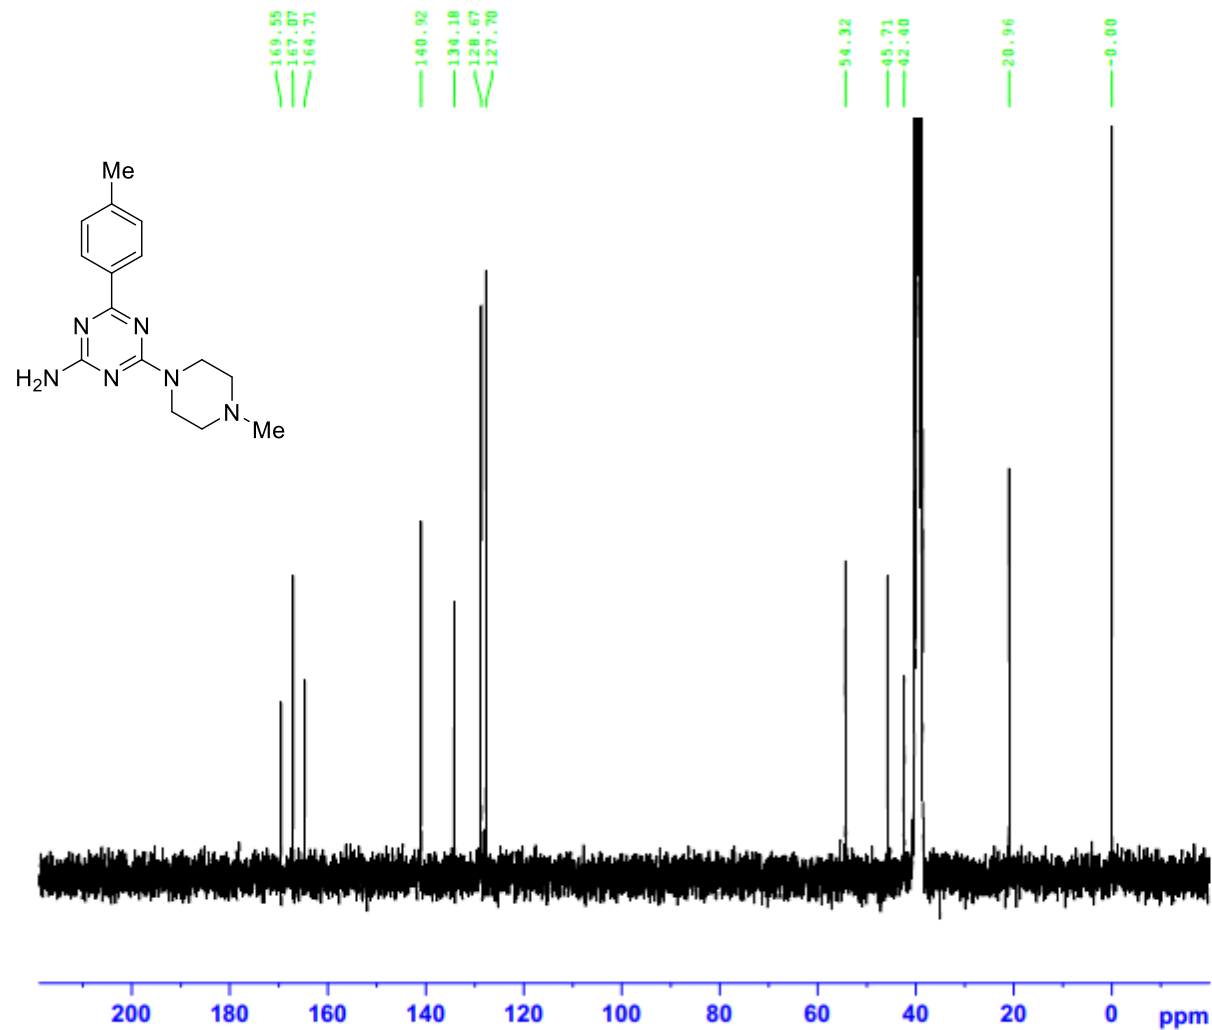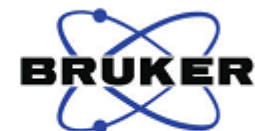

Current Data Parameters  
NAME MS346  
EXPNO 2  
PROCNO 1

F2 - Acquisition Parameters  
Date\_ 20191114  
Time 18.05  
INSTRUM FOURIER300  
PROBHD 5 mm DUL 13C-1  
PULPROG zgpg30  
TD 65536  
SOLVENT DMSO  
NS 12288  
DS 4  
SWH 24414.063 Hz  
FIDRES 0.372529 Hz  
AQ 1.3421773 sec  
RG 501.187  
DW 20.480 usec  
DE 6.50 usec  
TE 300.1 K  
D1 2.0000000 sec  
D11 0.0300000 sec  
D31 0.00001500 sec  
D40 0.00439029 sec  
L4 37  
L5 53  
P32 98.00 usec  
TDO 12

----- CHANNEL f1 -----  
SFO1 75.4828392 MHz  
NUC1 13C  
P1 15.00 usec  
PLW1 22.00000000 W

----- CHANNEL f2 -----  
SFO2 300.1612006 MHz  
NUC2 1H  
CPDPRG[2] waltz16  
PCPD2 98.00 usec  
PLW2 9.30000019 W  
PLW12 0.29359001 W  
PLW13 0.20359001 W

F2 - Processing parameters  
SI 32768  
SF 75.4753351 MHz  
WDW EM  
SSB 0  
LB 1.00 Hz  
GB 0  
PC 1.40

6-[4-(*tert*-Butyl)phenyl]-4-(4-methylpiperazino)-1,3,5-triazine-2-amine (9{4,7})

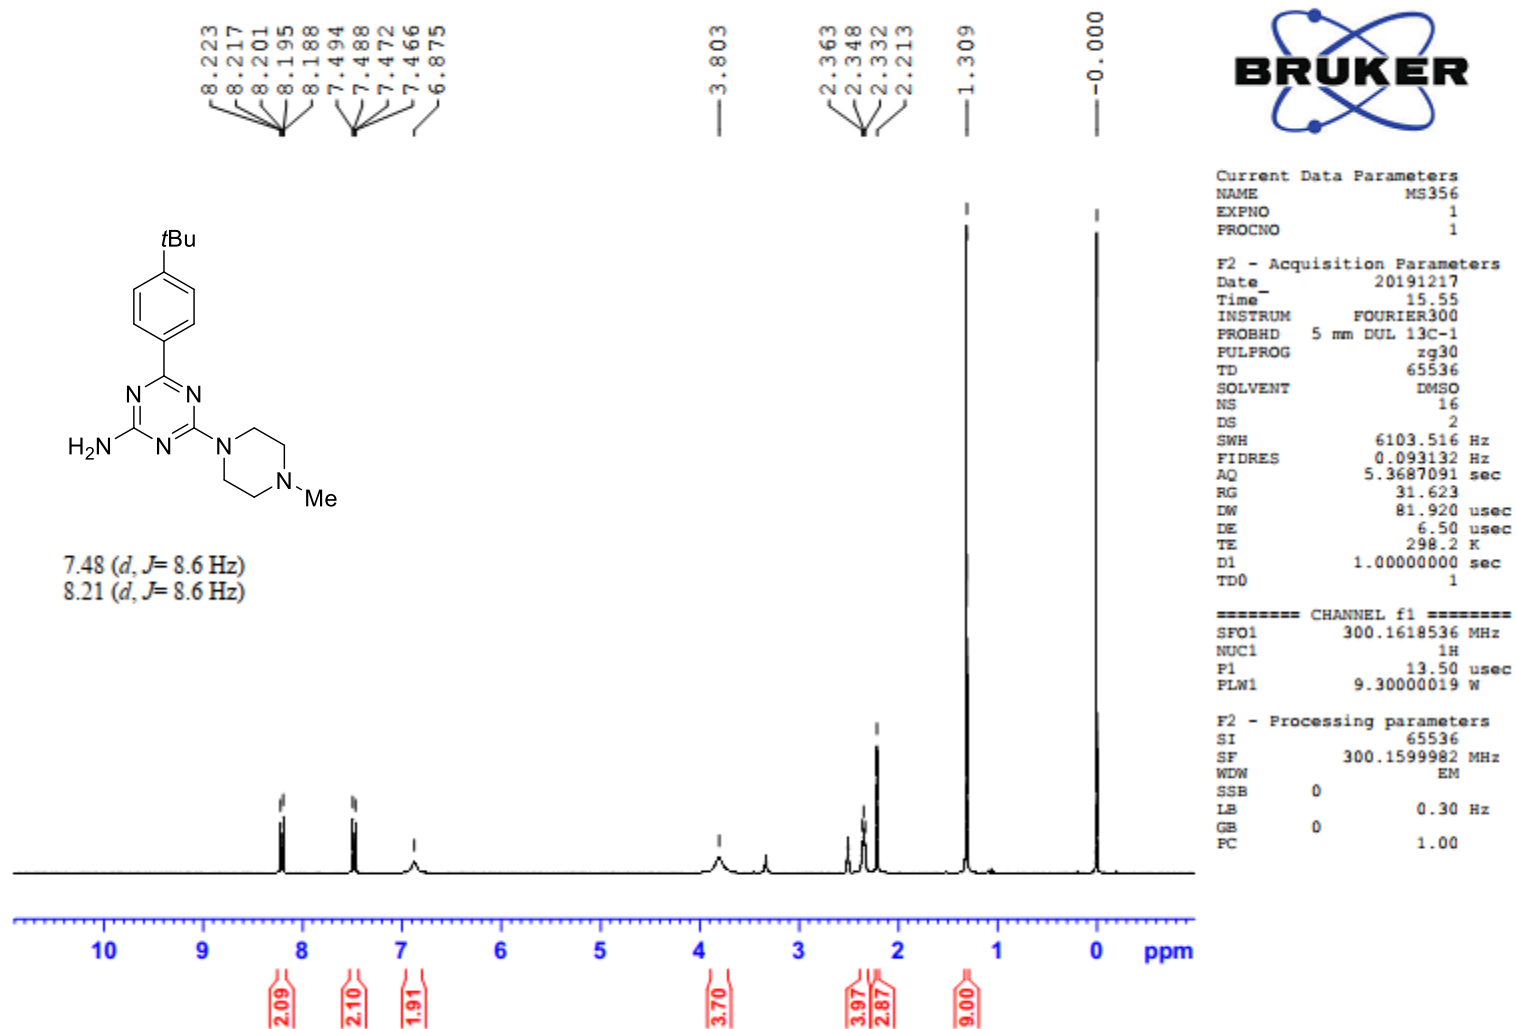

6-[4-(*tert*-Butyl)phenyl]-4-(4-methylpiperazino)-1,3,5-triazine-2-amine (9{4,7})

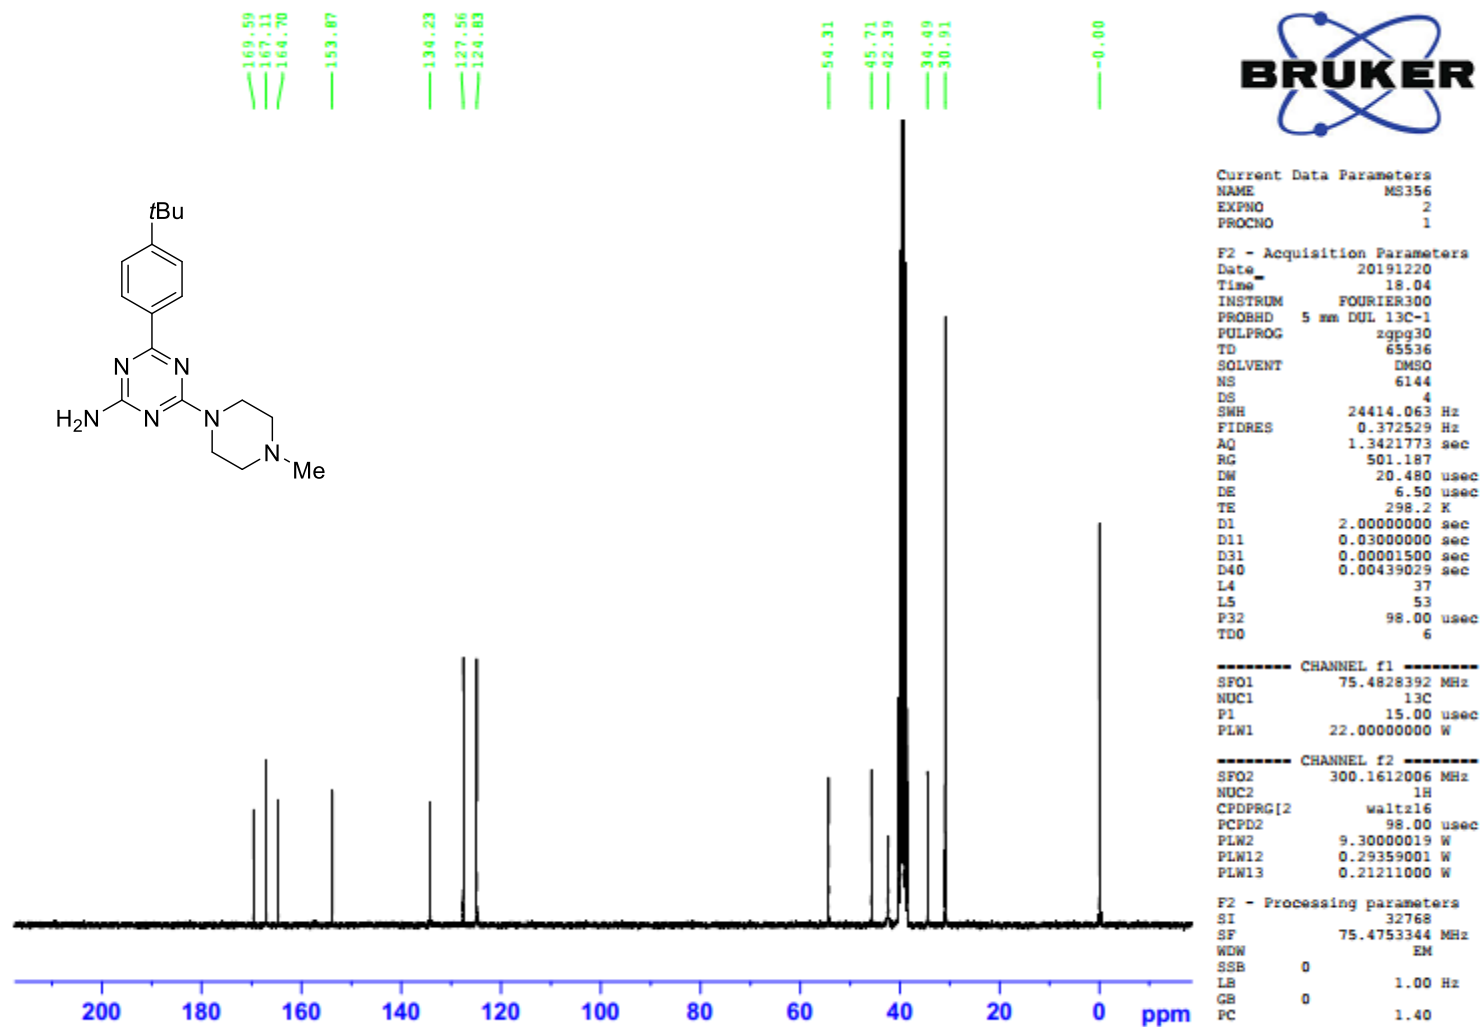

6-[4-(*N,N*-Dimethylamino)phenyl]-4-(4-methylpiperazino)-1,3,5-triazine-2-amine (**9**{4,8})

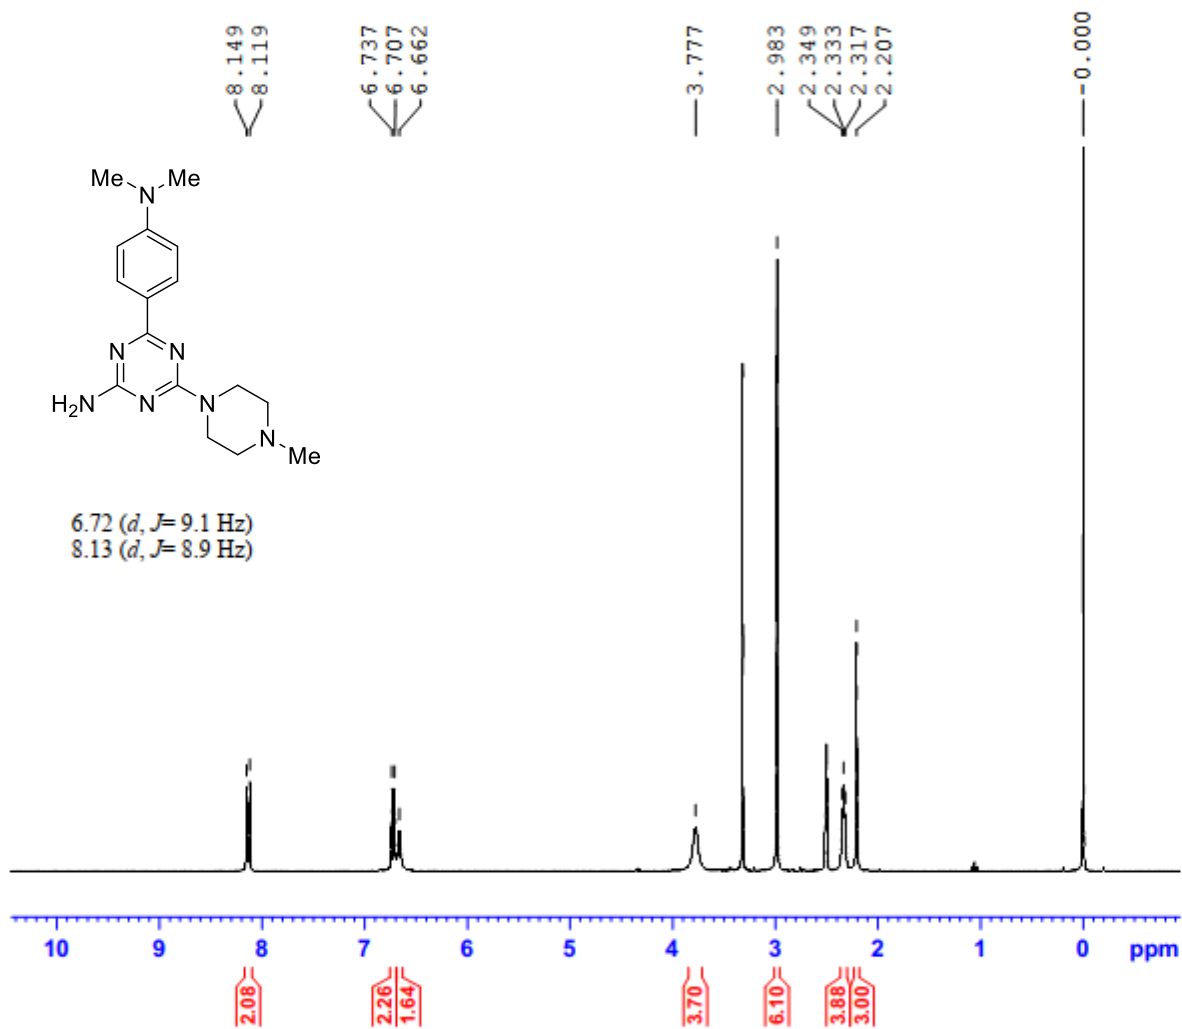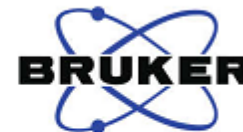

Current Data Parameters  
 NAME MS373  
 EXPNO 1  
 PROCNO 1

F2 - Acquisition Parameters  
 Date\_ 20191224  
 Time\_ 13.27  
 INSTRUM FOURIER300  
 PROBHD 5 mm DUL 13C-1  
 PULPROG zg30  
 TD 65536  
 SOLVENT DMSO  
 NS 16  
 DS 2  
 SWH 6103.516 Hz  
 FIDRES 0.093132 Hz  
 AQ 5.3687091 sec  
 RG 56.2187  
 DW 81.920 usec  
 DE 6.50 usec  
 TE 300.0 K  
 D1 1.00000000 sec  
 TD0 1

===== CHANNEL f1 =====  
 SF01 300.1618536 MHz  
 NUC1 1H  
 P1 13.50 usec  
 PLW1 9.30000019 W

F2 - Processing parameters  
 SI 65536  
 SF 300.1599997 MHz  
 WDW EM  
 SSB 0  
 LB 0.30 Hz  
 GB 0  
 PC 1.00



6-[4-(*N,N*-Dimethylamino)phenyl]-4-(4-methylpiperazino)-1,3,5-triazine-2-amine (**9**{4,8})

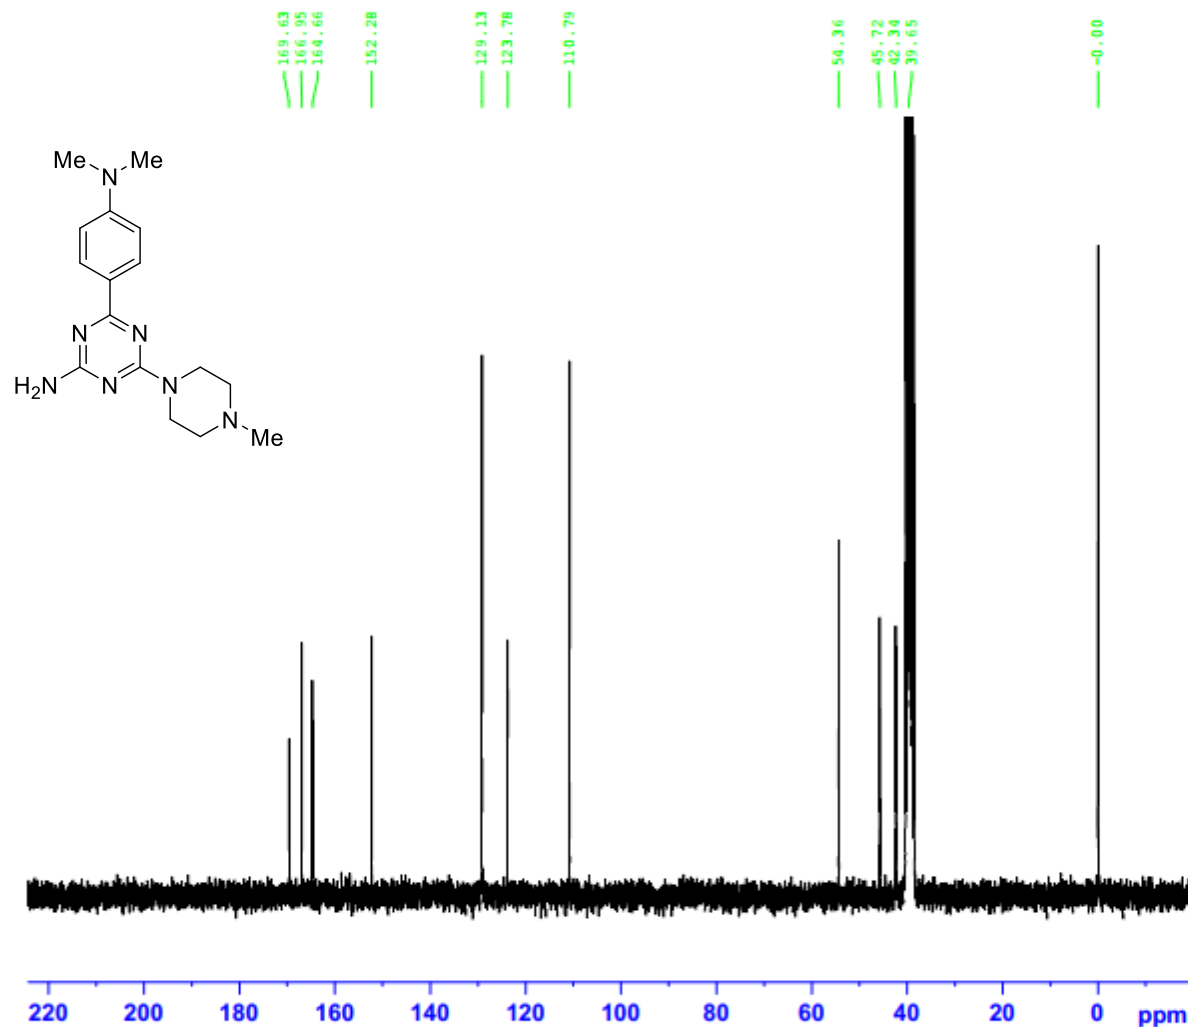

Current Data Parameters  
NAME MS373  
EXPNO 2  
PROCNO 1

F2 - Acquisition Parameters  
Date\_ 20191227  
Time 18.18  
INSTRUM FOURIER300  
PROBHD 5 mm DUL 13C-1  
PULPROG zgpg30  
TD 65536  
SOLVENT DMSO  
NS 4096  
DS 4  
SWH 24414.063 Hz  
FIDRES 0.372529 Hz  
AQ 1.3421773 sec  
RG 501.187  
DW 20.480 usec  
DE 6.50 usec  
TE 300.2 K  
D1 2.0000000 sec  
D11 0.0300000 sec  
D31 0.0000150 sec  
D40 0.00439029 sec  
I4 37  
I5 53  
P32 98.00 usec  
TDO 4

----- CHANNEL f1 -----  
SFO1 75.4828392 MHz  
NUC1 13C  
P1 15.00 usec  
PLW1 22.00000000 W

----- CHANNEL f2 -----  
SFO2 300.1612006 MHz  
NUC2 1H  
CPDPRG[2] waltz16  
PCPD2 98.00 usec  
PLW2 9.30000019 W  
PLW12 0.29359001 W  
PLW13 0.21211000 W

F2 - Processing parameters  
SI 32768  
SF 75.4753350 MHz  
WDW EM  
SSB 0  
LB 1.00 Hz  
GB 0  
PC 1.40

6-(4-Methoxyphenyl)-4-(4-methylpiperazino)-1,3,5-triazine-2-amine (9{4,9})

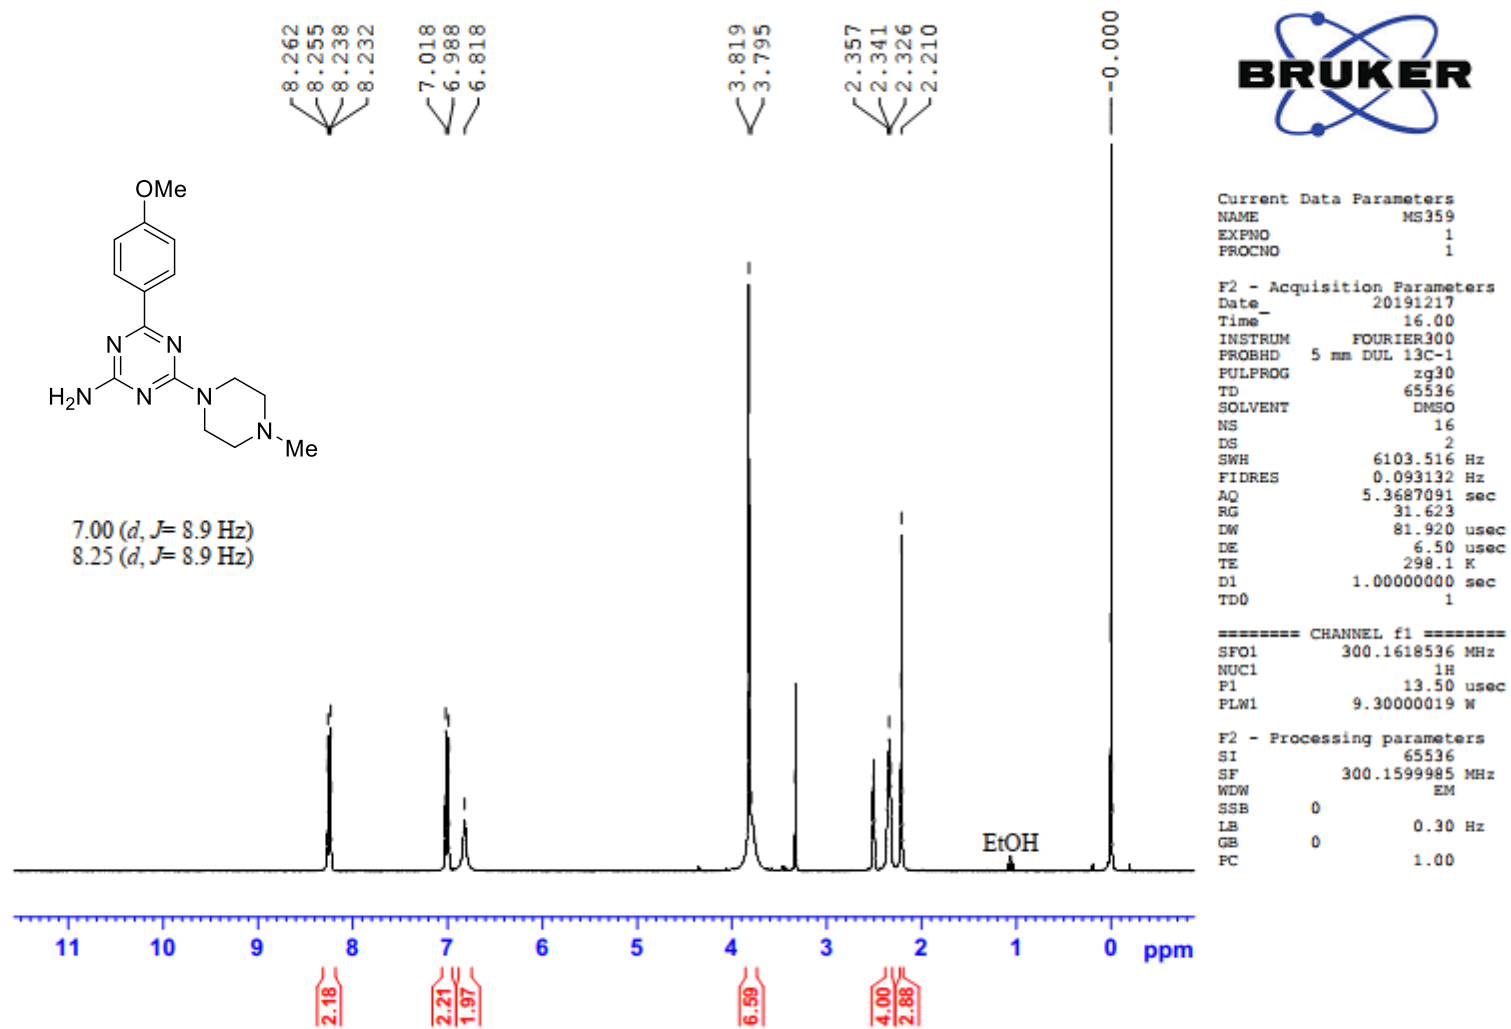

6-(4-Methoxyphenyl)-4-(4-methylpiperazino)-1,3,5-triazine-2-amine (9{4,9})

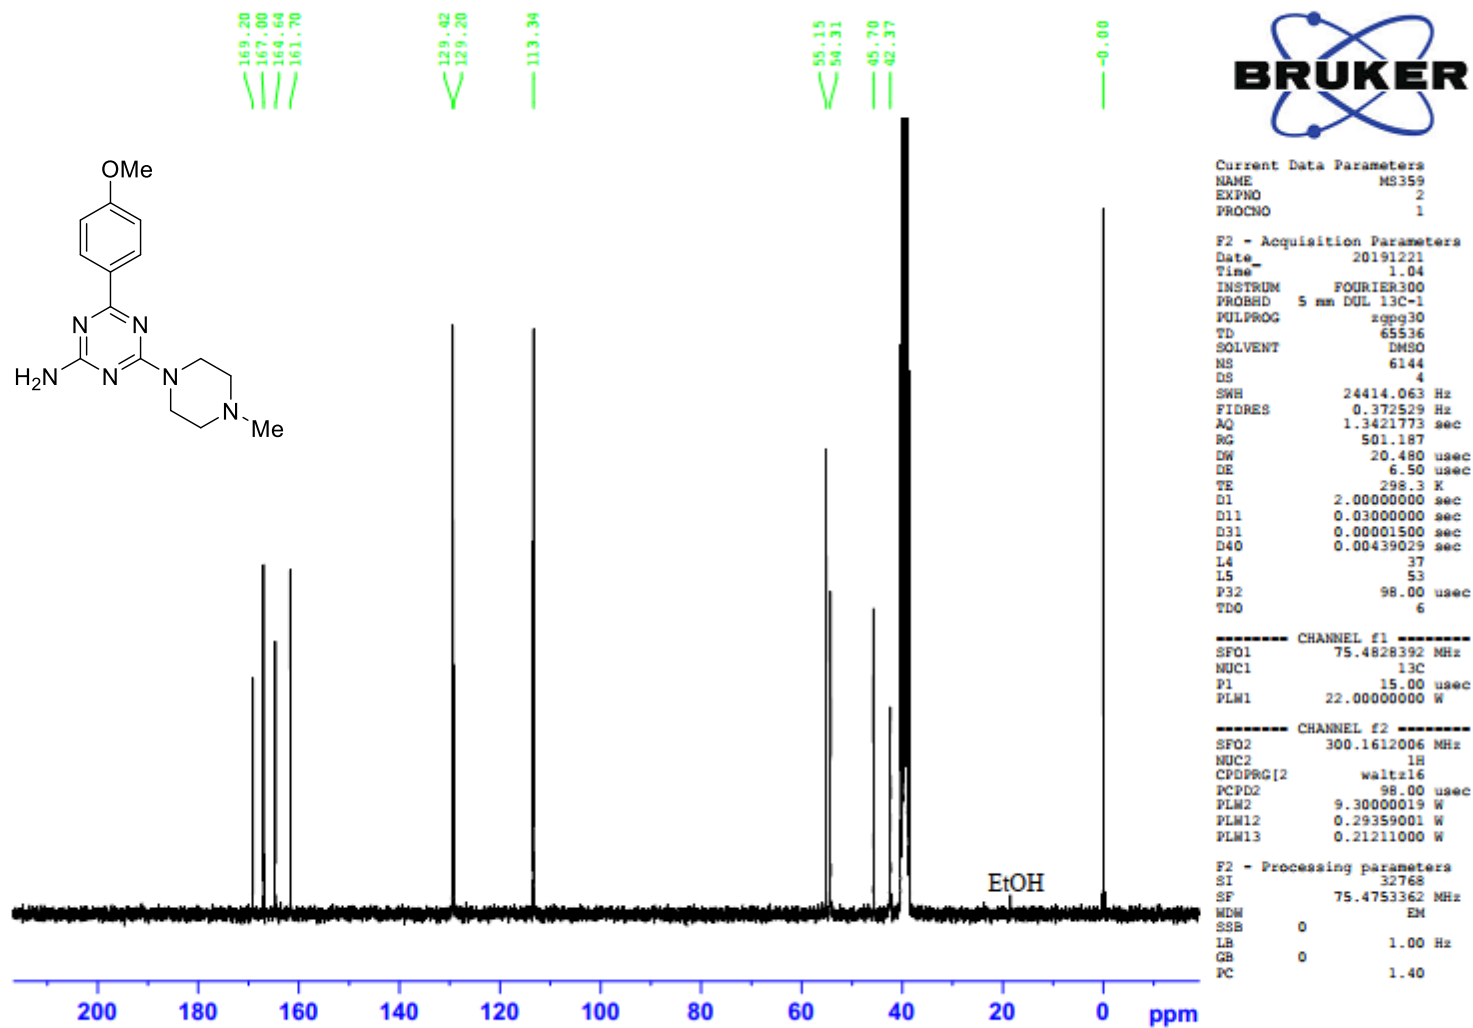

4-(4-Methylpiperazino)-6-(3-nitrophenyl)-1,3,5-triazine-2-amine (9{4,10})

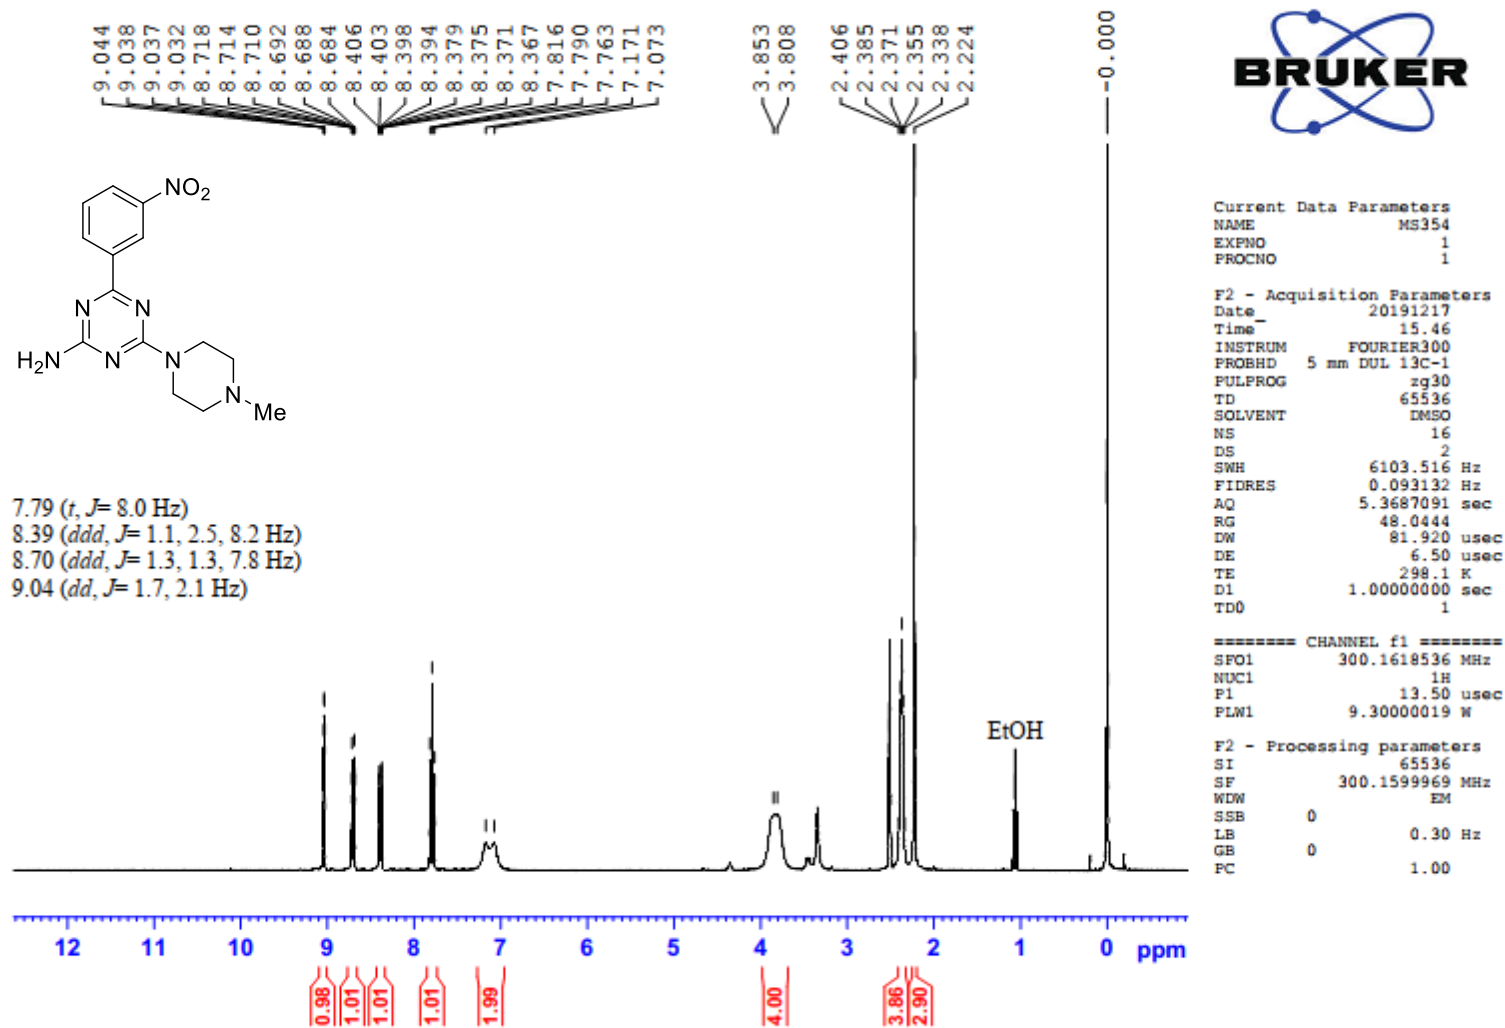

4-(4-Methylpiperazino)-6-(3-nitrophenyl)-1,3,5-triazine-2-amine (9{4,10})

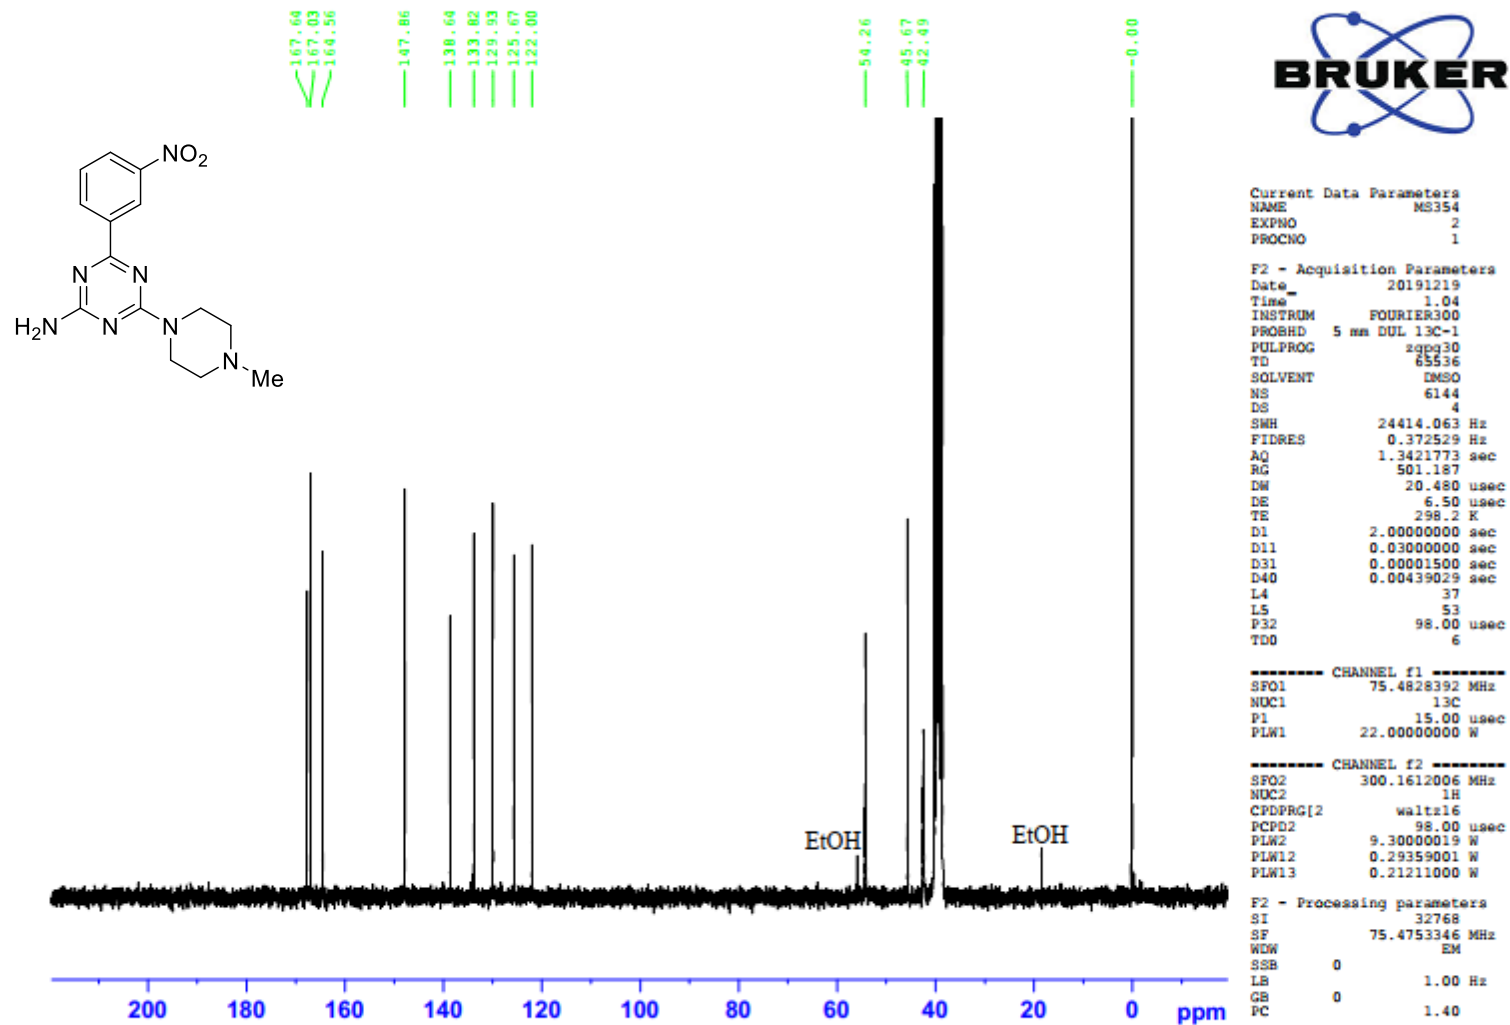

6-[4-(Trifluoromethyl)phenyl]-4-(4-methylpiperazino)-1,3,5-triazine-2-amine (9{4,11})

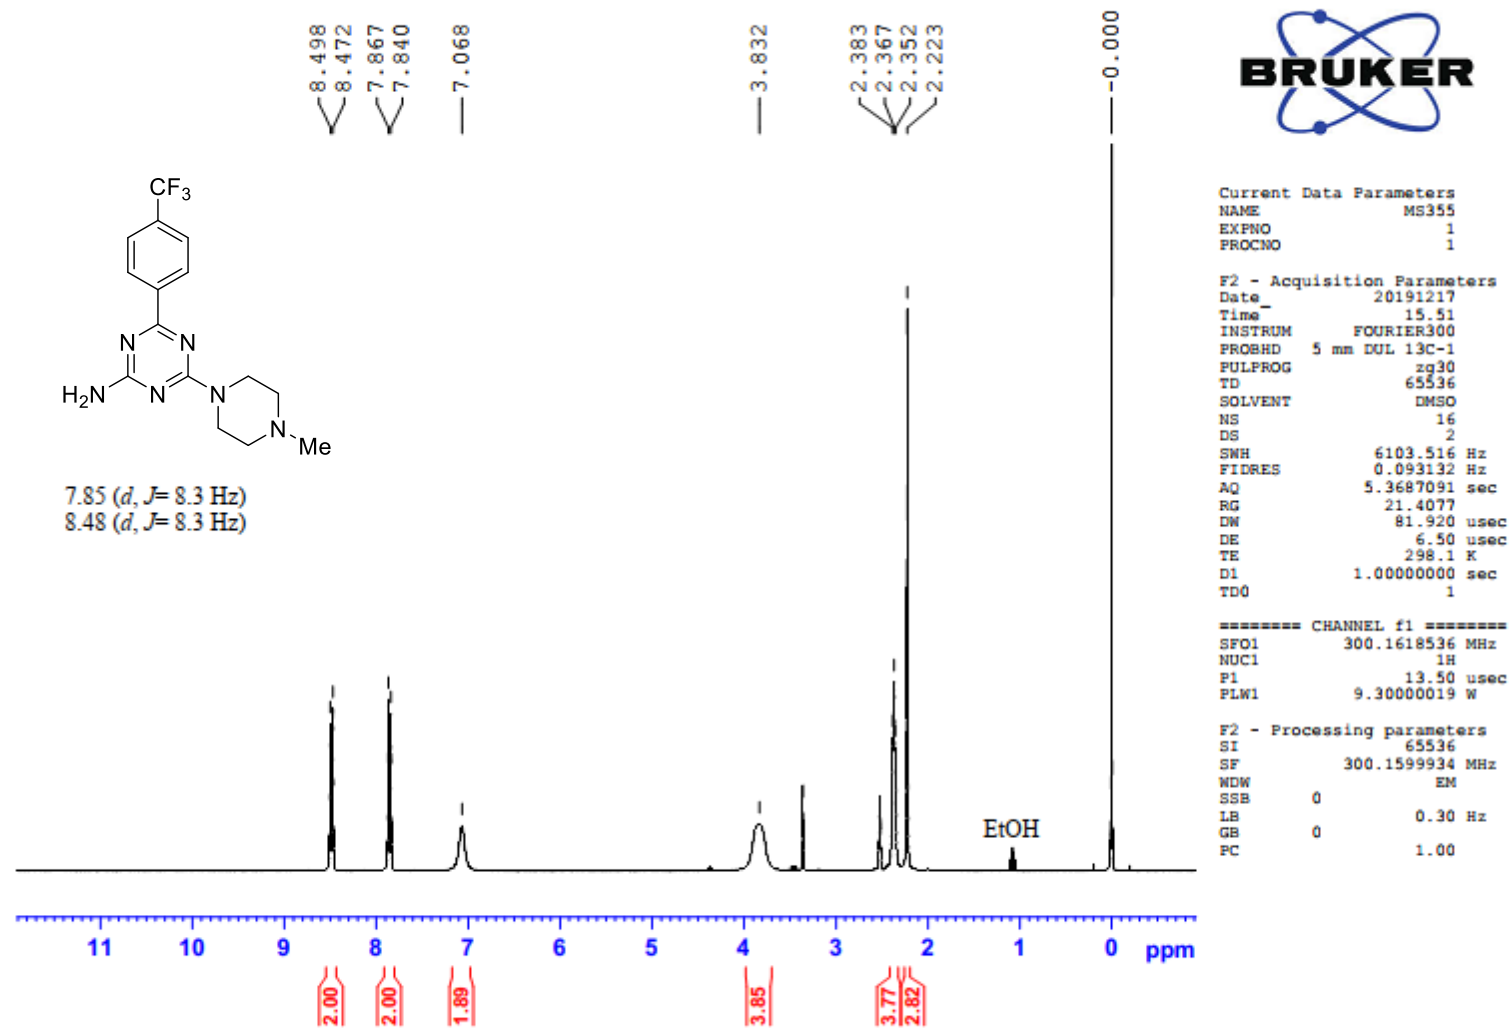

6-[4-(Trifluoromethyl)phenyl]-4-(4-methylpiperazino)-1,3,5-triazine-2-amine (**9**{4,11})

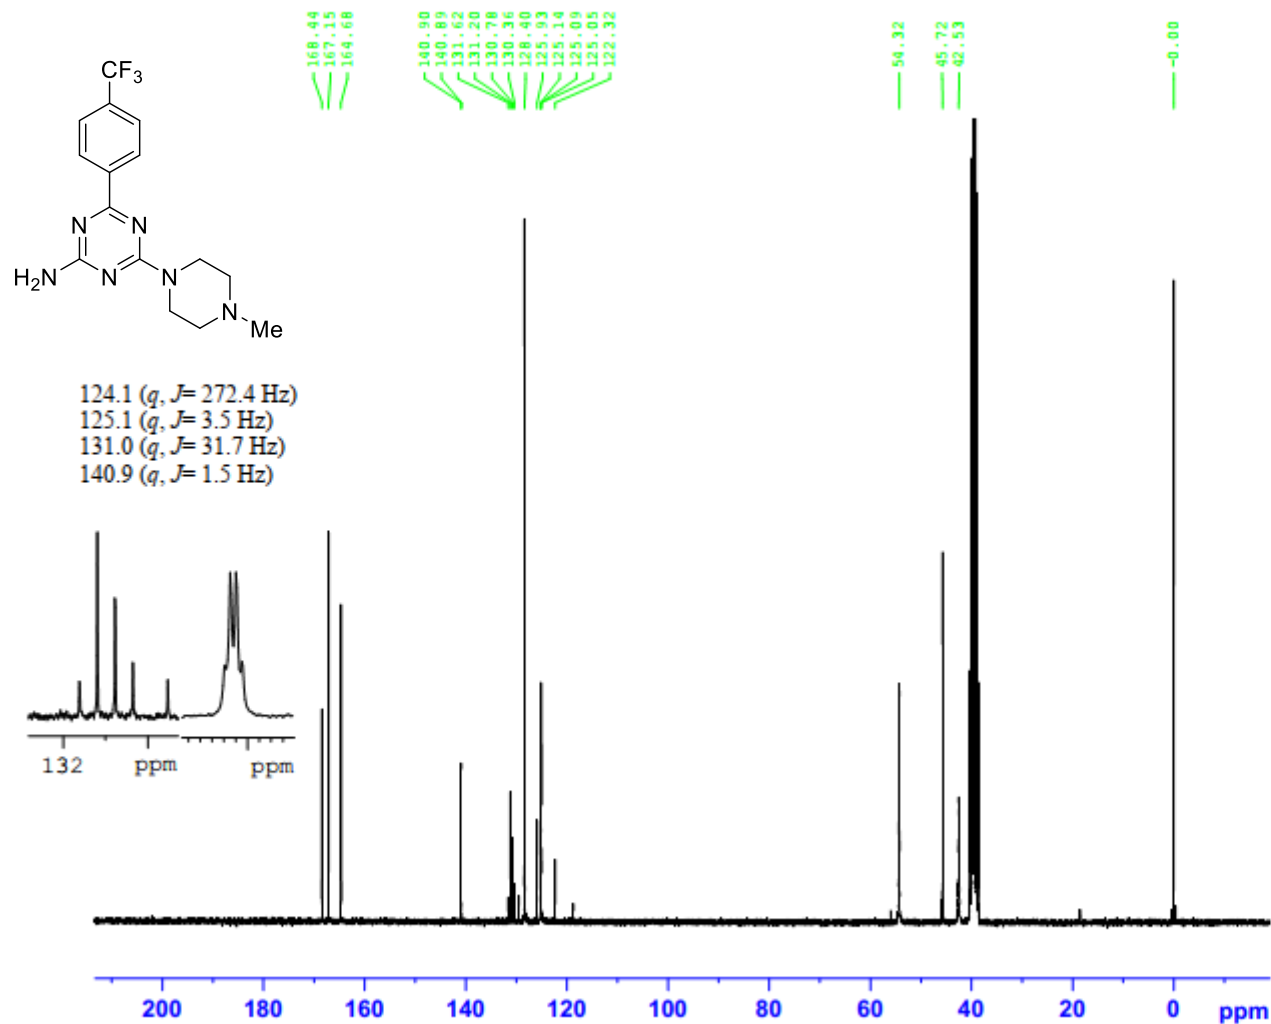

Current Data Parameters  
 NAME M9355  
 EXPNO 2  
 PROCNO 1

F2 - Acquisition Parameters  
 Date\_ 20191219  
 Time 18.05  
 INSTRUM FOURIER300  
 PROBHD 5 mm DUL 13C-1  
 PULPROG zgpg30  
 TD 65536  
 SOLVENT DMSO  
 NS 12288  
 DS 4  
 SWH 24414.063 Hz  
 FIDRES 0.372529 Hz  
 AQ 1.3421773 sec  
 RG 501.187  
 DW 20.480 usec  
 DE 6.50 usec  
 TE 298.2 K  
 D1 2.00000000 sec  
 D11 0.03000000 sec  
 D31 0.00001500 sec  
 D40 0.00439029 sec  
 L4 37  
 L5 53  
 P32 98.00 usec  
 TD0 12

----- CHANNEL f1 -----  
 SFO1 75.4828392 MHz  
 NUC1 13C  
 P1 15.00 usec  
 PLW1 22.00000000 W

----- CHANNEL f2 -----  
 SFO2 300.1612006 MHz  
 NUC2 1H  
 PCPDPRG2 waltz16  
 PCPD2 98.00 usec  
 PLW2 9.30000019 W  
 PLW12 0.29359001 W  
 PLW13 0.21211000 W

F2 - Processing parameters  
 SI 32768  
 SF 75.4753297 MHz  
 WDW EM  
 SSB 0  
 LB 0.50 Hz  
 GB 0  
 PC 1.40

6-[4-(Trifluoromethoxy)phenyl]-4-(4-methylpiperazino)-1,3,5-triazine-2-amine (9{4,12})

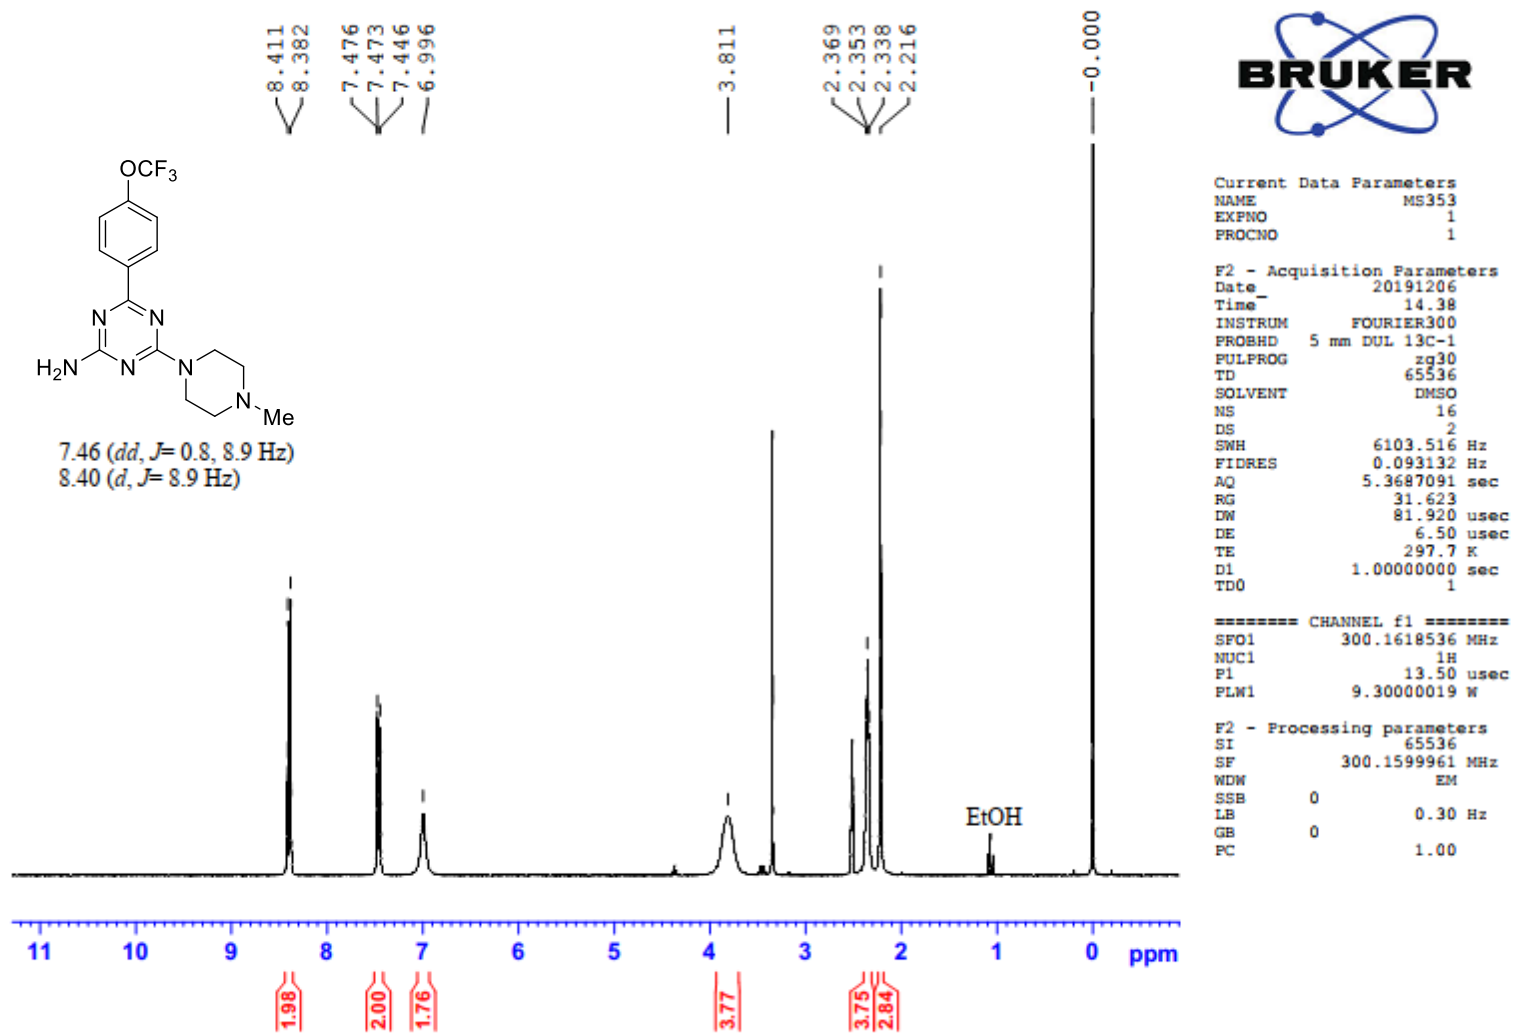



6-[4-(Trifluoromethoxy)phenyl]-4-(4-methylpiperazino)-1,3,5-triazine-2-amine (9{4,12})

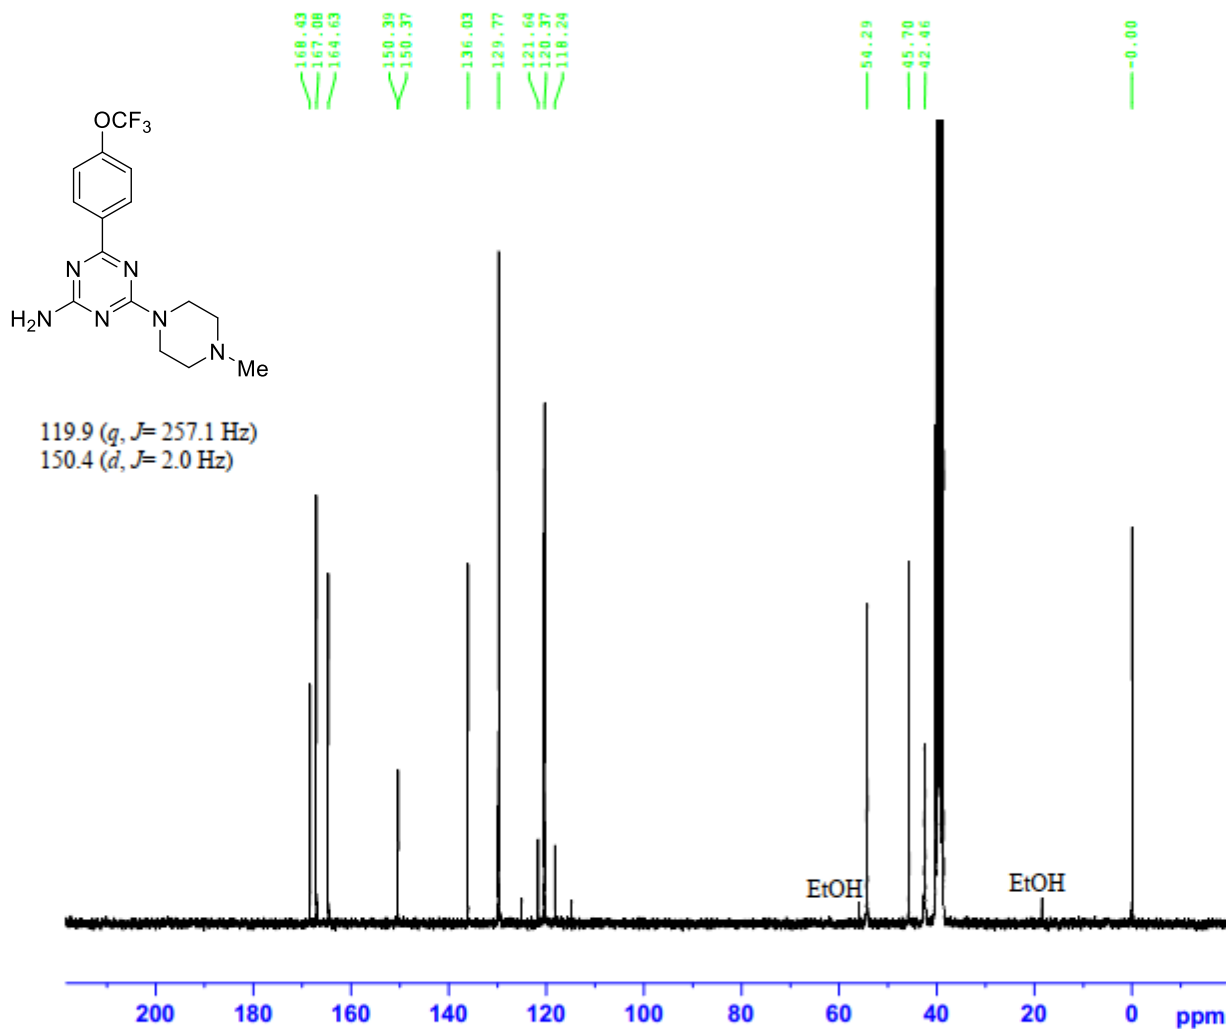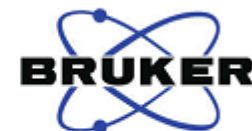

Current Data Parameters  
NAME MS353  
EXPNO 2  
PROCNO 1

F2 - Acquisition Parameters  
Date\_ 20191210  
Time 18.05  
INSTRUM FOURIER300  
PROBHD 5 mm DUL 13C-1  
PULPROG zgpg30  
TD 65536  
SOLVENT DMSO  
NS 12288  
DS 4  
SWH 24414.063 Hz  
FIDRES 0.372529 Hz  
AQ 1.3421773 sec  
RG 501.187  
DW 20.480 usec  
DE 6.50 usec  
TE 298.2 K  
D1 2.00000000 sec  
D11 0.03000000 sec  
D31 0.00001500 sec  
D40 0.00439029 sec  
L4 37  
L5 53  
P32 98.00 usec  
TDD 12

----- CHANNEL f1 -----  
SFO1 75.4828392 MHz  
NUC1 13C  
P1 15.00 usec  
PLW1 22.00000000 W

----- CHANNEL f2 -----  
SFO2 300.1612006 MHz  
NUC2 1H  
CPDPRG[2] waltz16  
PCPD2 98.00 usec  
PLW2 9.30000019 W  
PLW12 0.29359001 W  
PLW13 0.21211000 W

F2 - Processing parameters  
SI 32768  
SF 75.4753327 MHz  
WDW EM  
SSB 0  
LB 1.00 Hz  
GB 0  
PC 1.40

6-[3-(Benzyloxy)phenyl]-4-(4-methylpiperazino)-1,3,5-triazine-2-amine (9{4,14})

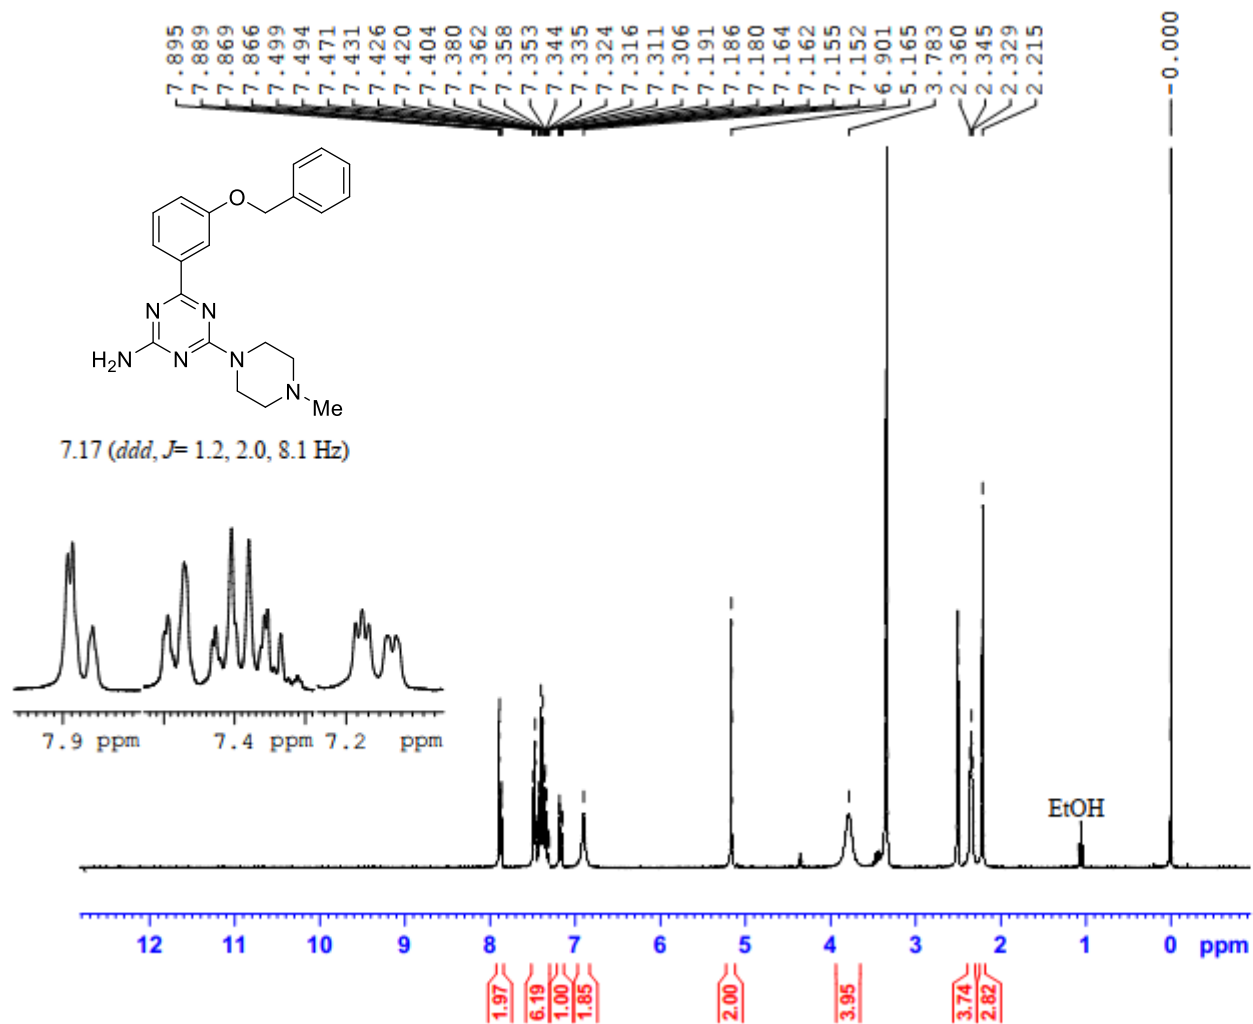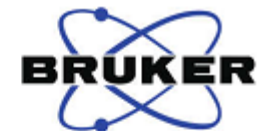

Current Data Parameters  
 NAME MS363  
 EXPNO 6  
 PROCNO 1

F2 - Acquisition Parameters  
 Date 20210826  
 Time 10.10  
 INSTRUM FOURIER300  
 PROBHD 5 mm DUL 13C-1  
 PULPROG zg30  
 TD 65536  
 SOLVENT DMSO  
 NS 16  
 DS 2  
 SMH 6103.516 Hz  
 FIDRES 0.093132 Hz  
 AQ 5.3687091 sec  
 RG 76.3575  
 DW 81.920 usec  
 DE 6.50 usec  
 TE 298.2 K  
 D1 1.00000000 sec  
 TD0 1

===== CHANNEL f1 =====  
 SF01 300.1618536 MHz  
 NUC1 1H  
 P1 13.50 usec  
 PLW1 9.30000019 W

F2 - Processing parameters  
 SI 65536  
 SF 300.1599987 MHz  
 WDW EM  
 SSB 0  
 LB 0.30 Hz  
 GB 0  
 PC 1.00

6-[3-(Benzyloxy)phenyl]-4-(4-methylpiperazino)-1,3,5-triazine-2-amine (**9**{4,14})

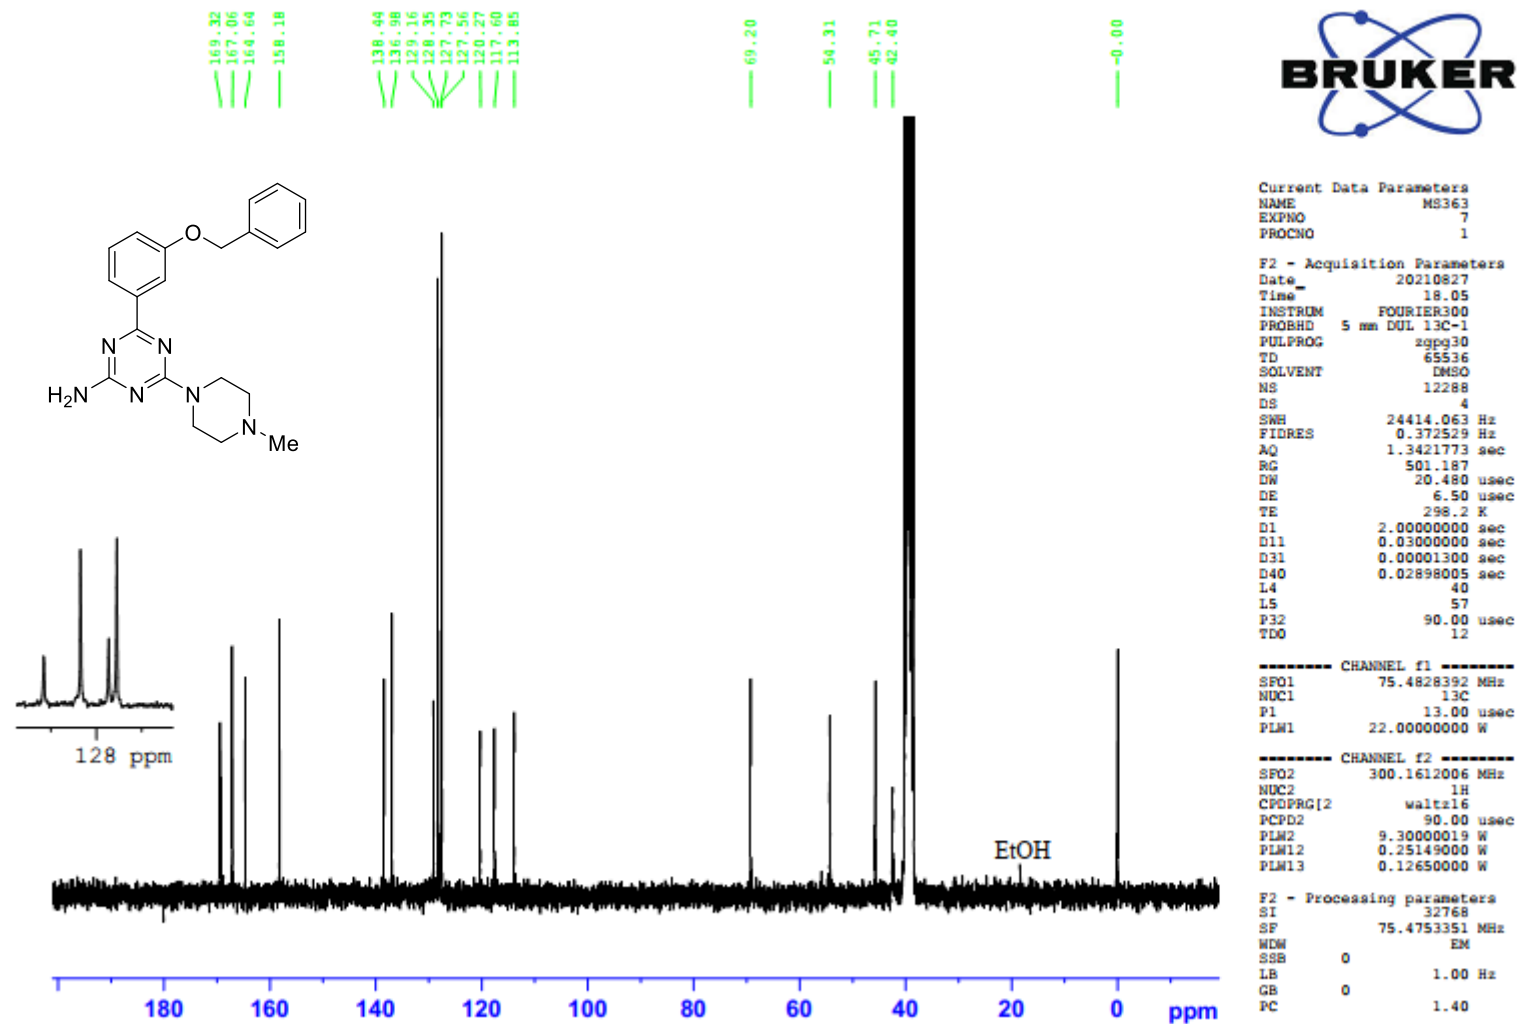

6-[4-(Benzyloxy)phenyl]-4-(4-methylpiperazino)-1,3,5-triazine-2-amine (9{4,15})

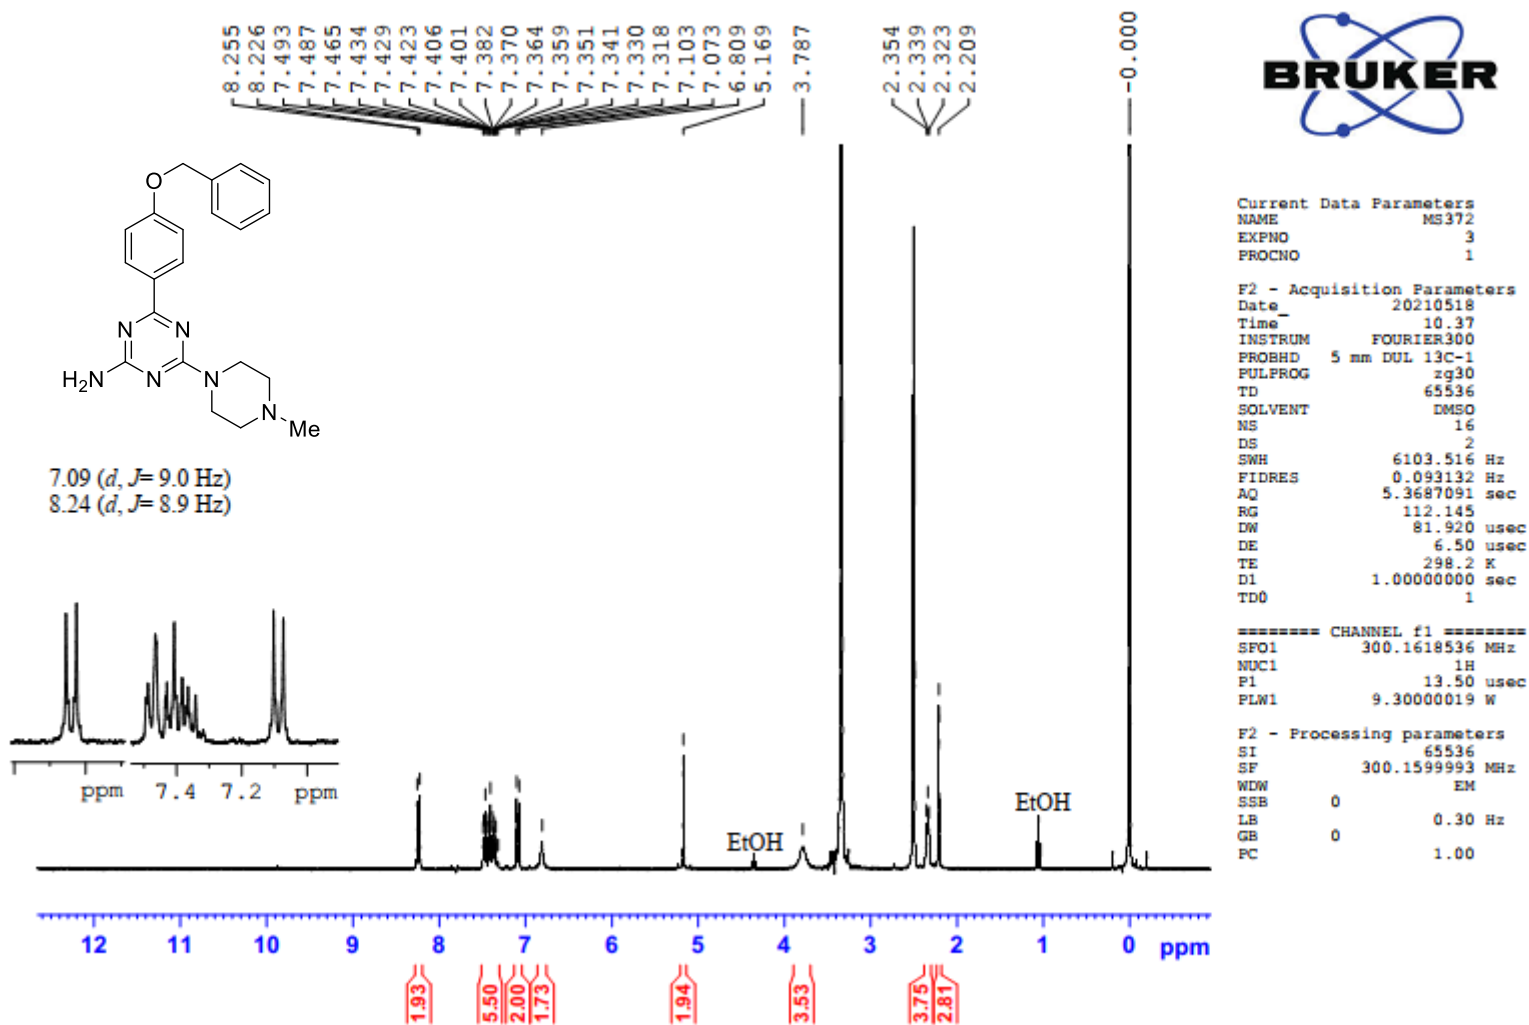

6-[4-(Benzyloxy)phenyl]-4-(4-methylpiperazino)-1,3,5-triazine-2-amine (9{4,15})

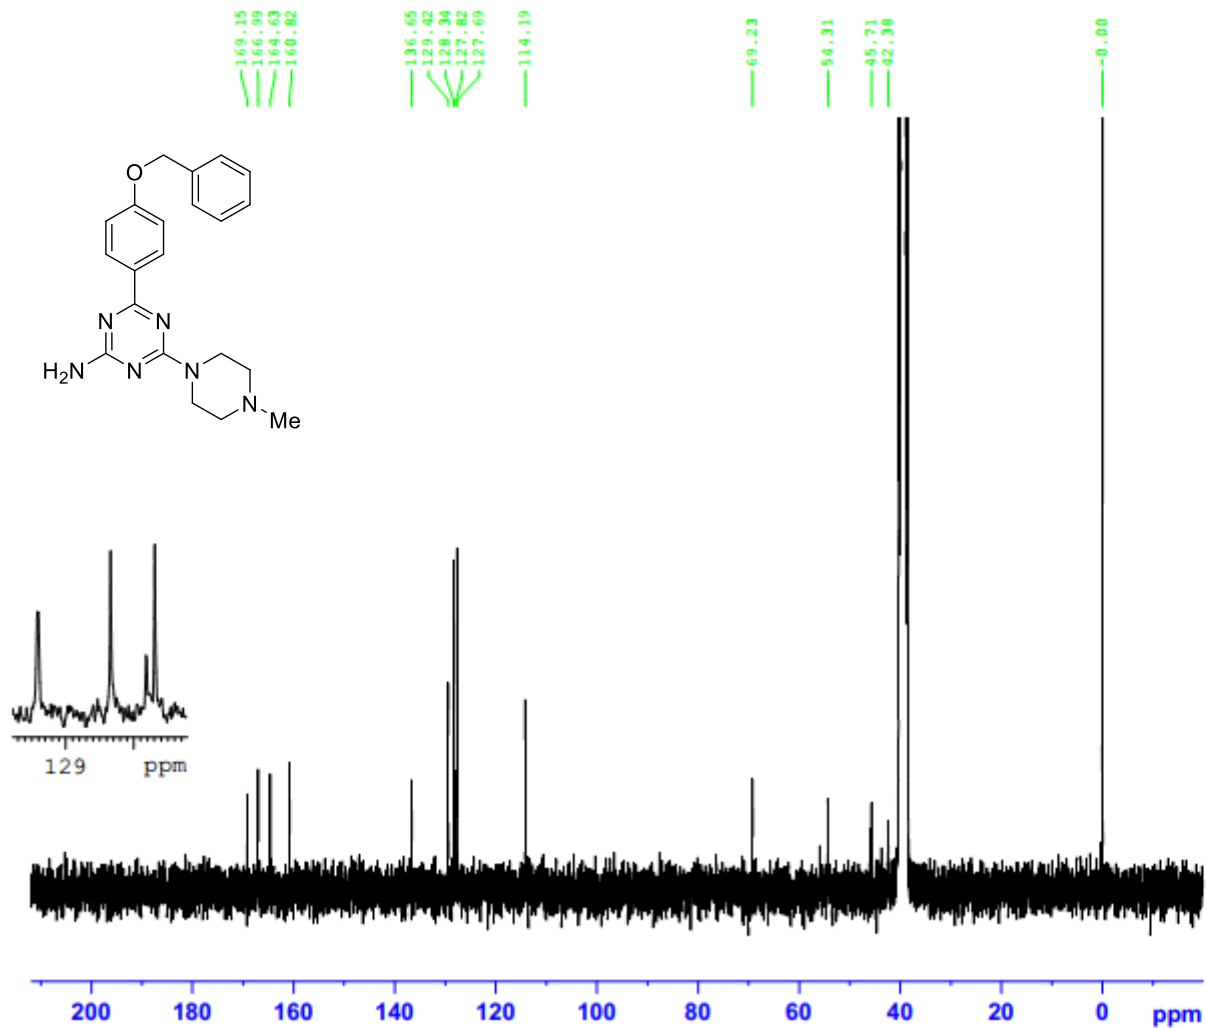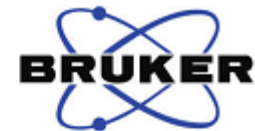

Current Data Parameters  
 NAME MS372  
 EXPNO 4  
 PROCNO 1

F2 - Acquisition Parameters  
 Date\_ 20210521  
 Time 18.08  
 INSTRUM FOURIER300  
 PROBHD 5 mm DGL 13C-1  
 PULPROG zgpg30  
 TD 65536  
 SOLVENT DMSO  
 NS 24576  
 DS 4  
 SWH 24414.063 Hz  
 FIDRES 0.372529 Hz  
 AQ 1.3421773 sec  
 RG 501.187  
 DW 20.480 usec  
 DE 6.50 usec  
 TE 298.2 K  
 D1 2.0000000 sec  
 D11 0.0300000 sec  
 D31 0.0000130 sec  
 D40 0.02898005 sec  
 L4 40  
 L5 57  
 P32 90.00 usec  
 TD0 24

----- CHANNEL f1 -----  
 SFO1 75.4828392 MHz  
 NUC1 13C  
 P1 13.00 usec  
 PLW1 22.0000000 W

----- CHANNEL f2 -----  
 SFO2 300.1612006 MHz  
 NUC2 1H  
 CPDPRG2 waltz16  
 PCPD2 90.00 usec  
 PLW2 9.30000019 W  
 PLW12 0.2514900 W  
 PLW13 0.1265000 W

F2 - Processing parameters  
 SI 32768  
 SF 75.4753357 MHz  
 NDM EM  
 SSB 0  
 LB 1.00 Hz  
 GB 0  
 PC 1.40

6-(3,4-Dimethoxyphenyl)-4-(4-methylpiperazino)-1,3,5-triazine-2-amine (9{4,16})

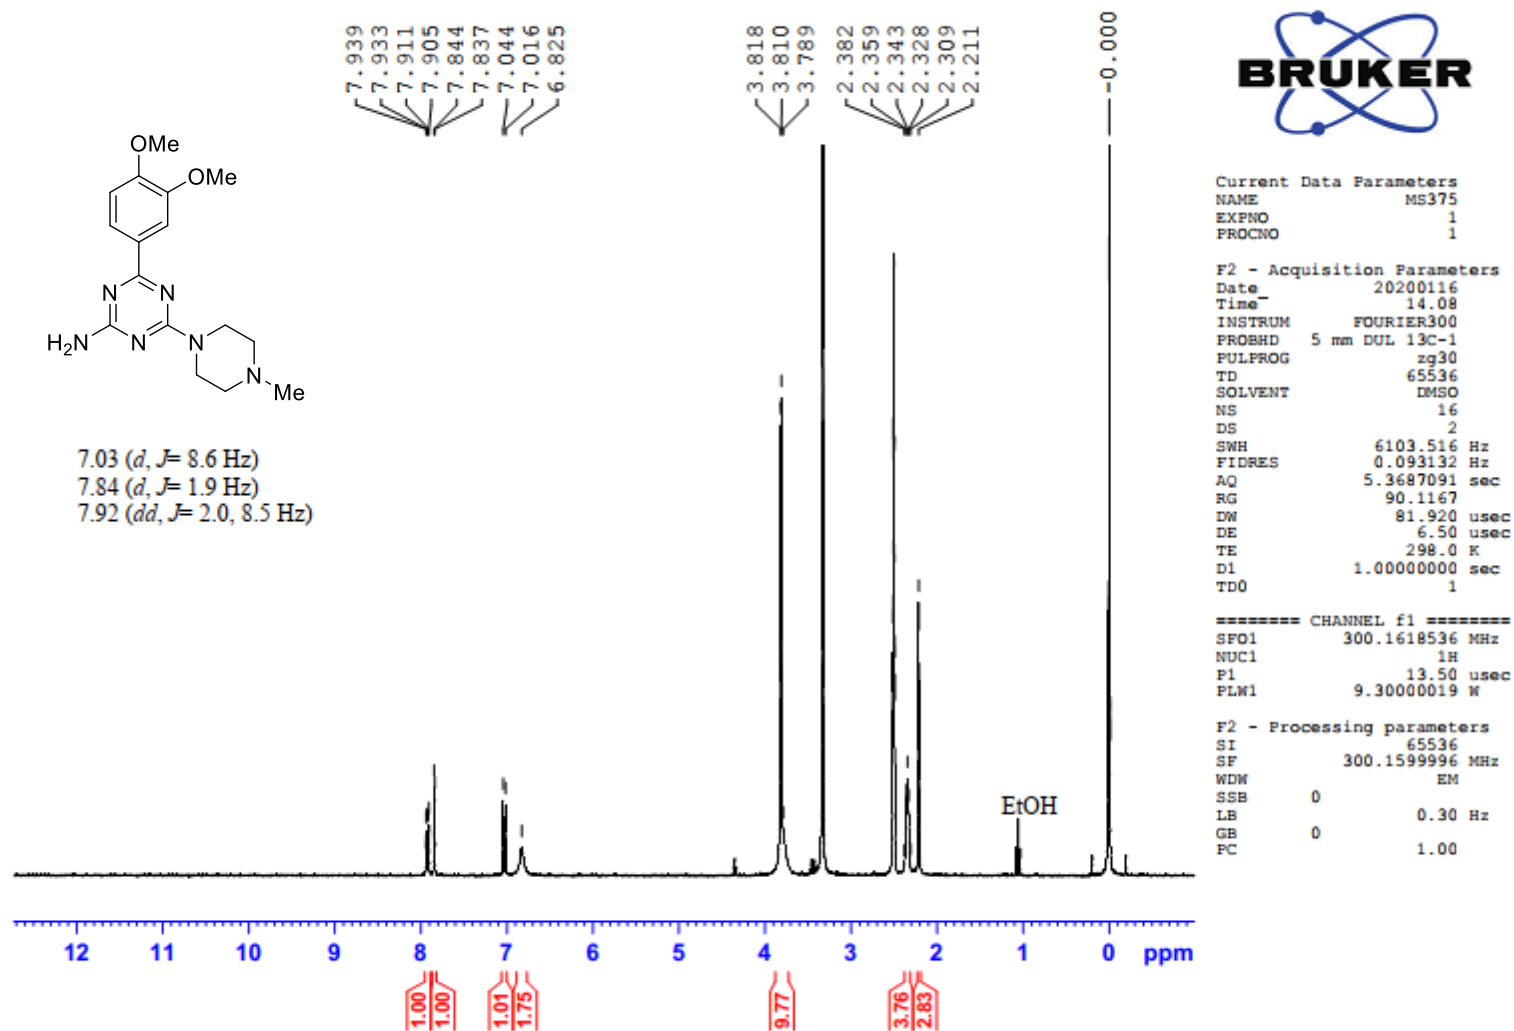

6-(3,4-Dimethoxyphenyl)-4-(4-methylpiperazino)-1,3,5-triazine-2-amine (9{4,16})

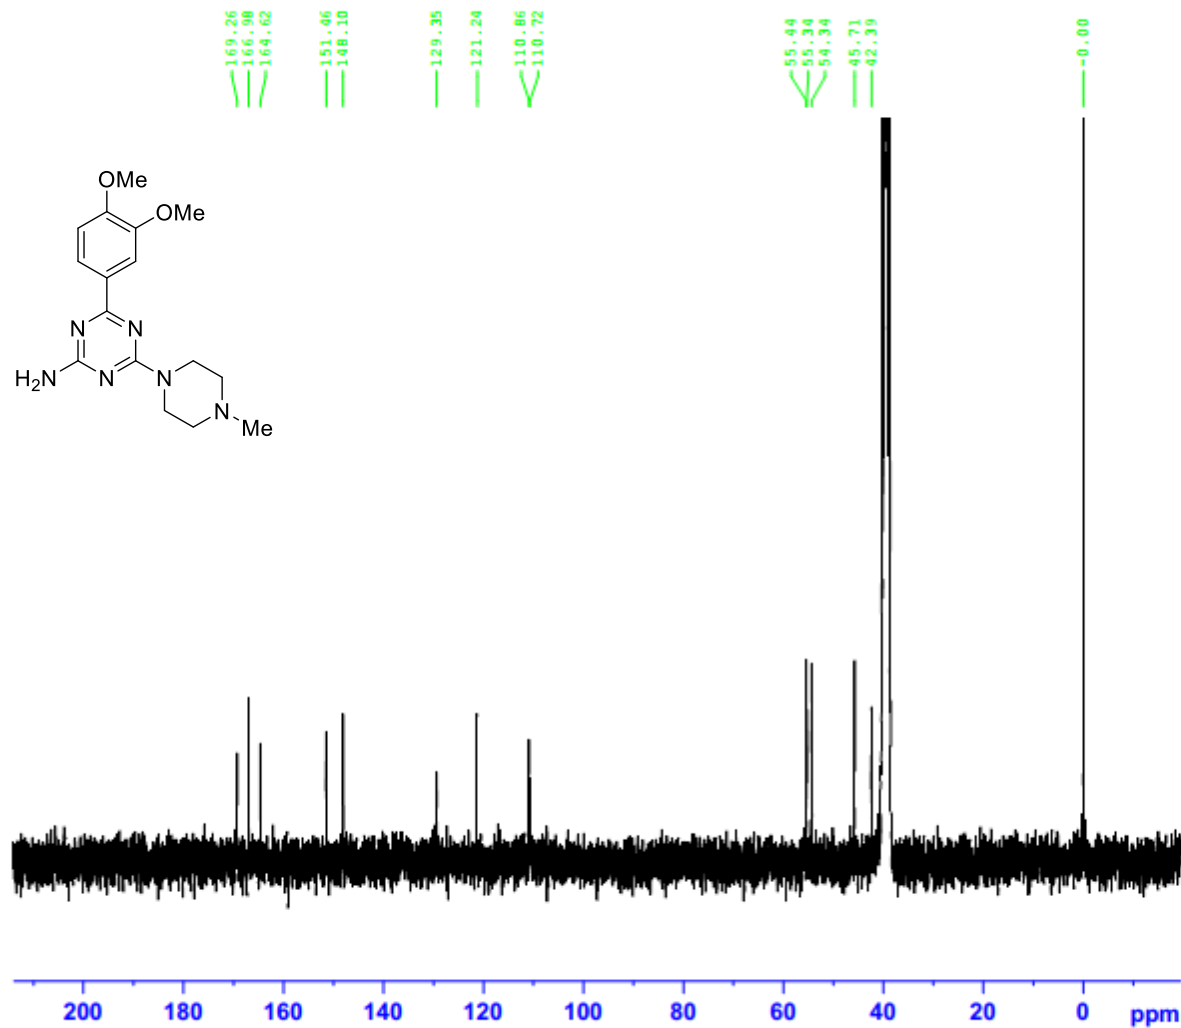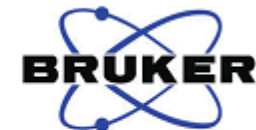

Current Data Parameters  
NAME MS375  
EXPNO 2  
PROCNO 1

F2 - Acquisition Parameters  
Date\_ 20200117  
Time 18.06  
INSTRUM FOURIER300  
PROBHD 5 mm DGL 13C-1  
PULPROG zgpg30  
TD 65536  
SOLVENT DMSO  
NS 12288  
DS 4  
SWH 24414.063 Hz  
FIDRES 0.372529 Hz  
AQ 1.3421773 sec  
RG 501.187  
DW 20.480 usec  
DE 6.50 usec  
TE 298.1 K  
D1 2.00000000 sec  
D11 0.03000000 sec  
D31 0.00001500 sec  
D40 0.00439029 sec  
L4 37  
L5 53  
P32 98.00 usec  
TDO 12

----- CHANNEL f1 -----  
SFO1 75.4828392 MHz  
NDC1 13C  
P1 15.00 usec  
PLW1 22.00000000 W

----- CHANNEL f2 -----  
SFO2 300.1612006 MHz  
NDC2 1H  
CPDPRG[2] waltz16  
PCPD2 98.00 usec  
PLW2 9.30000019 W  
PLW12 0.29359001 W  
PLW13 0.21211000 W

F2 - Processing parameters  
SI 32768  
SF 75.4753357 MHz  
WDW EM  
SSB 0  
LB 1.00 Hz  
GB 0  
PC 1.40

6-(3,4,5-Trimethoxyphenyl)-4-(4-methylpiperazino)-1,3,5-triazine-2-amine (9{4,17})

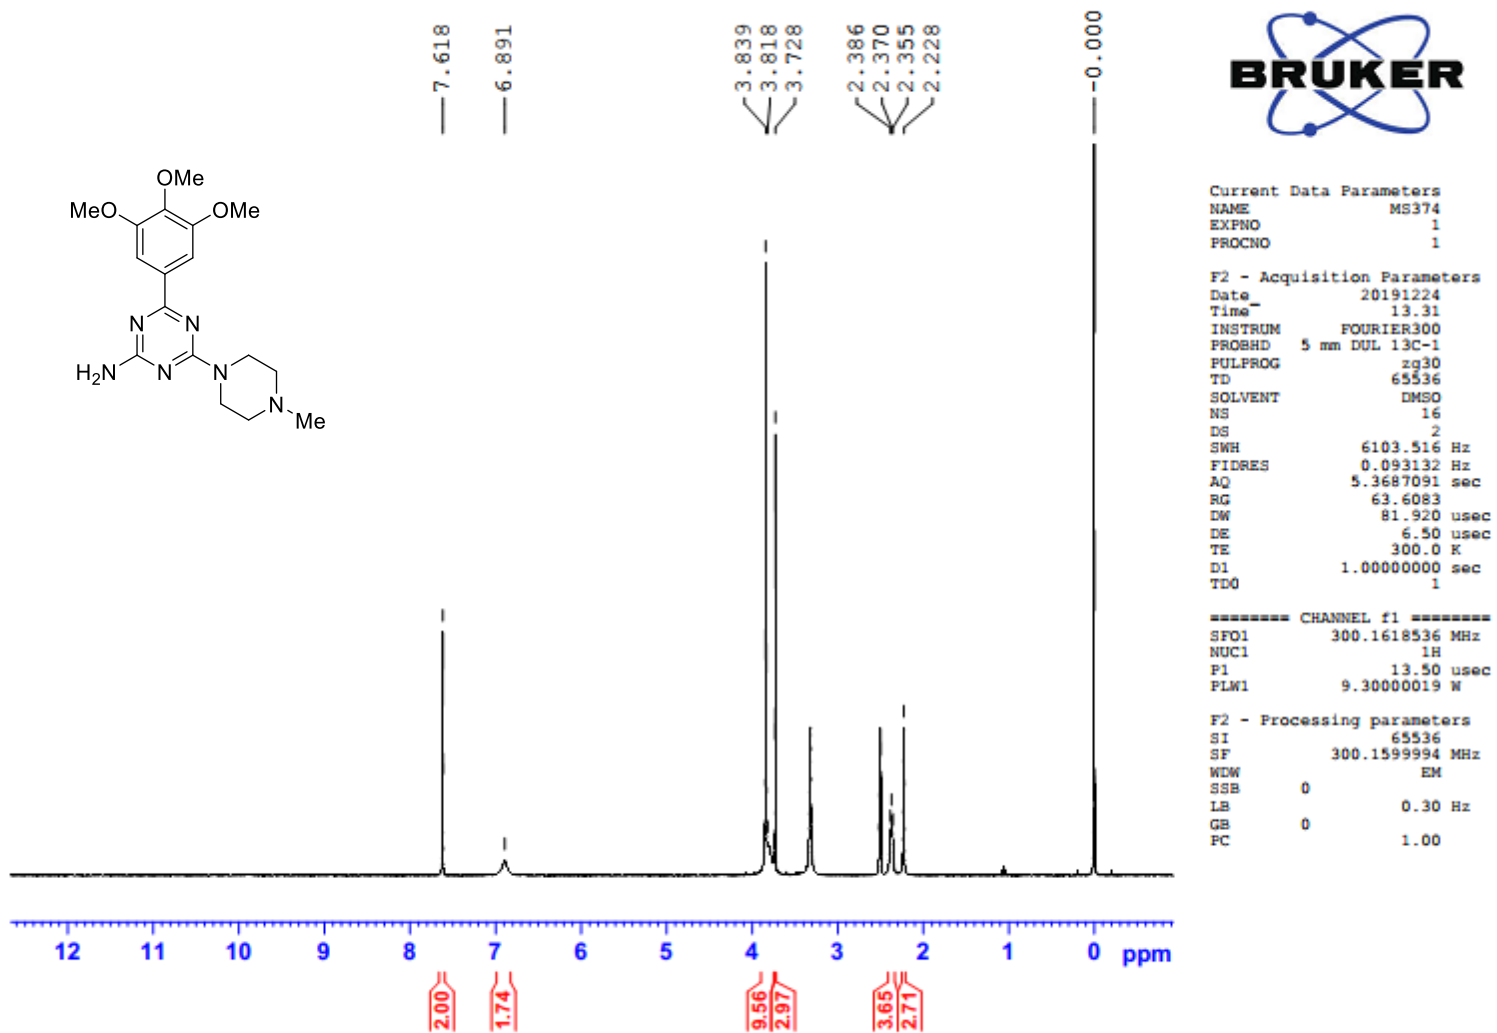



6-(3,4,5-Trimethoxyphenyl)-4-(4-methylpiperazino)-1,3,5-triazine-2-amine (9{4,17})

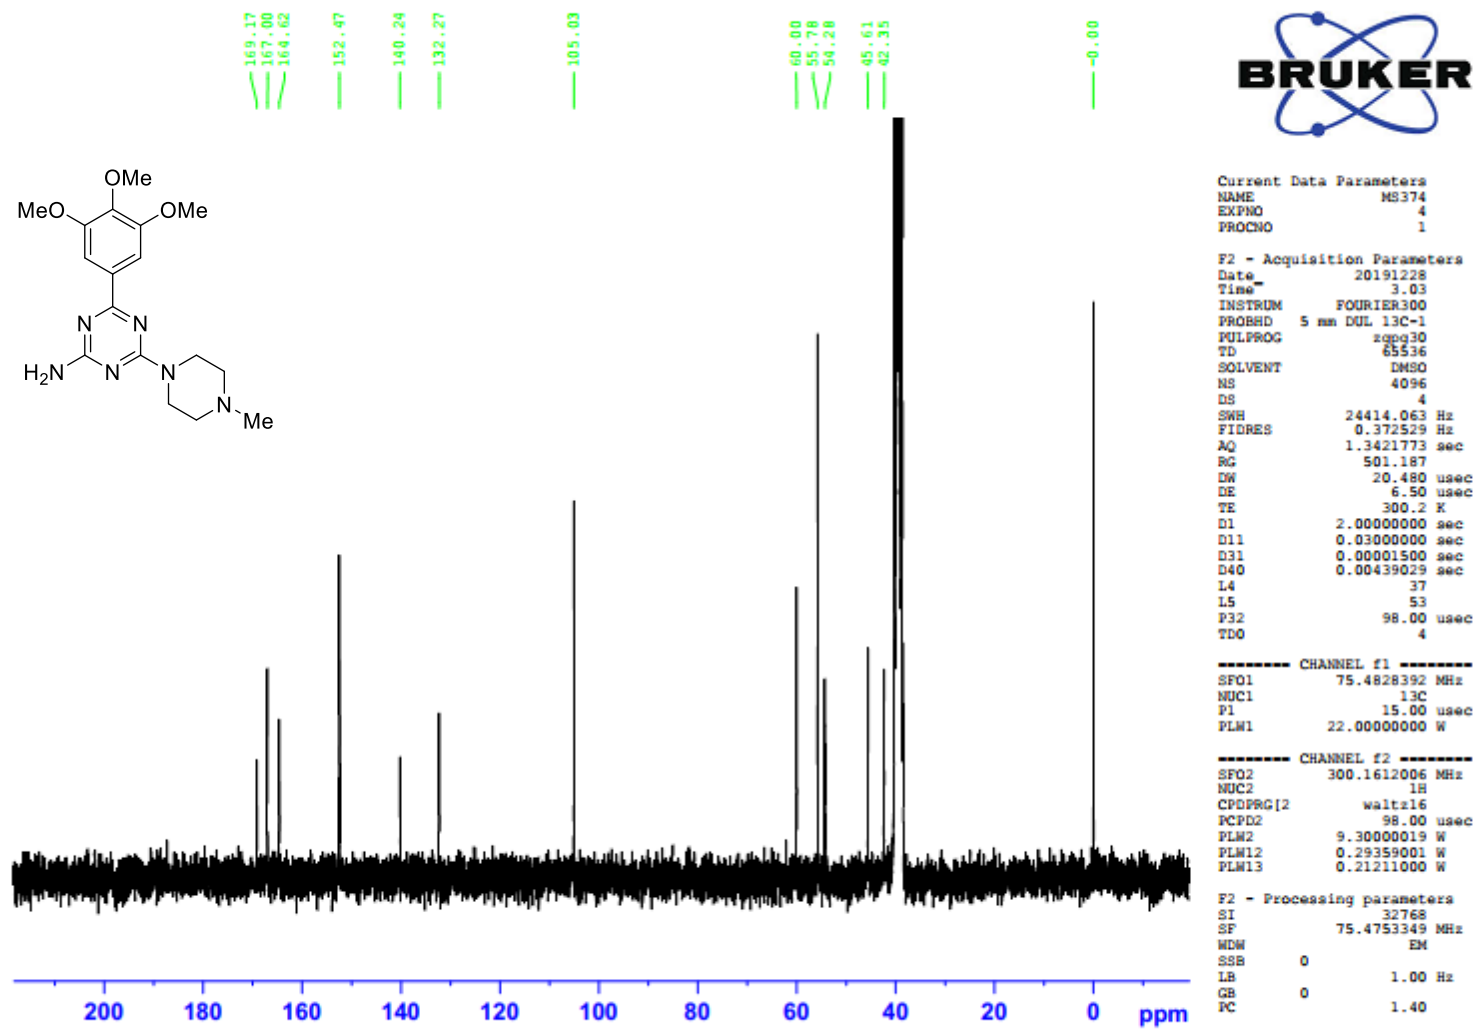

6-(3-Fluorophenyl)-4-(3,4-dihydroisoquinolin-2(1H)-yl)-1,3,5-triazine-2-amine (9{6,2})

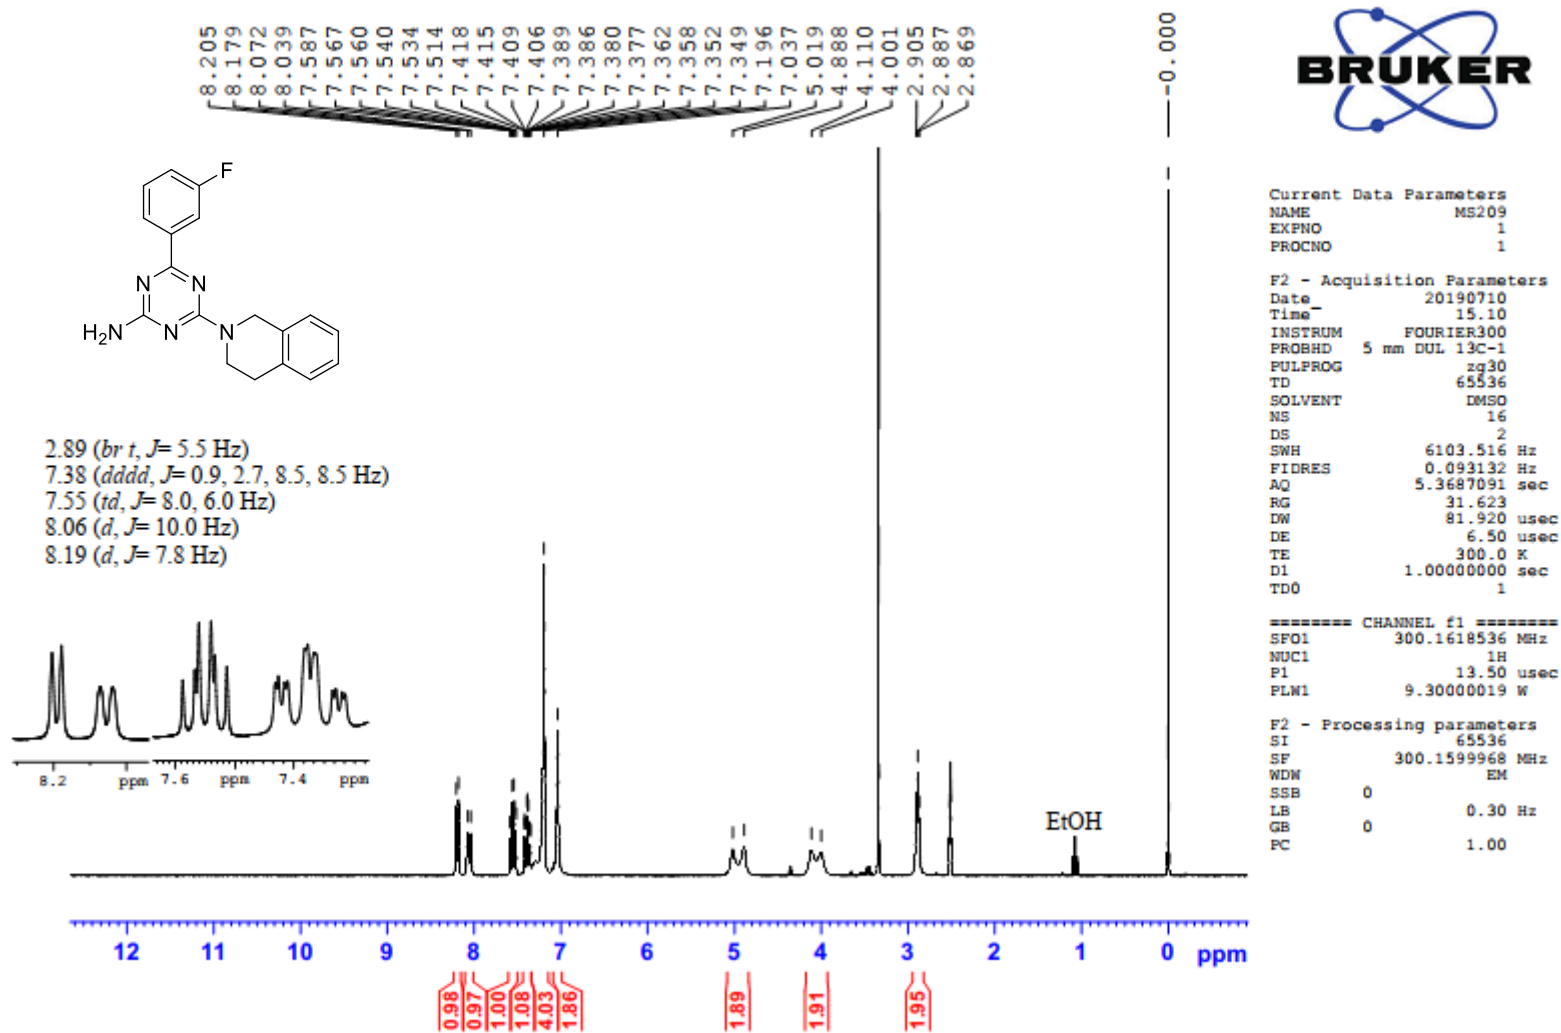

6-(3-Fluorophenyl)-4-(3,4-dihydroisoquinolin-2(1H)-yl)-1,3,5-triazine-2-amine (9{6,2})

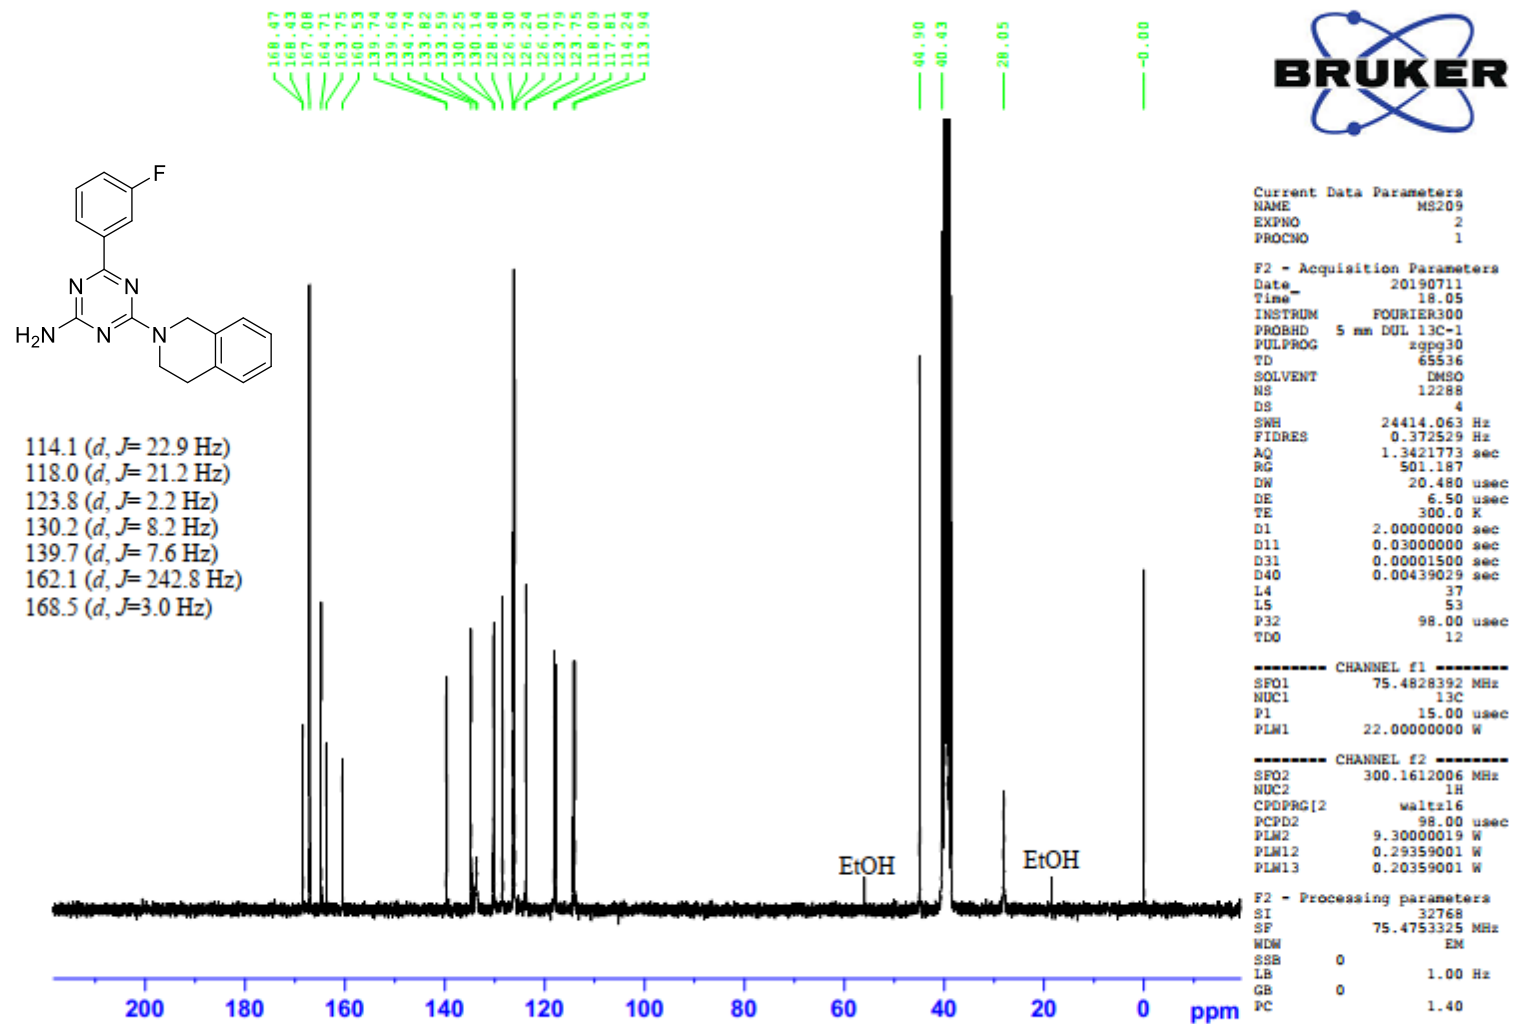

6-(4-Chlorophenyl)-4-(3,4-dihydroisoquinolin-2(1H)-yl)-1,3,5-triazine-2-amine (9{6,4})

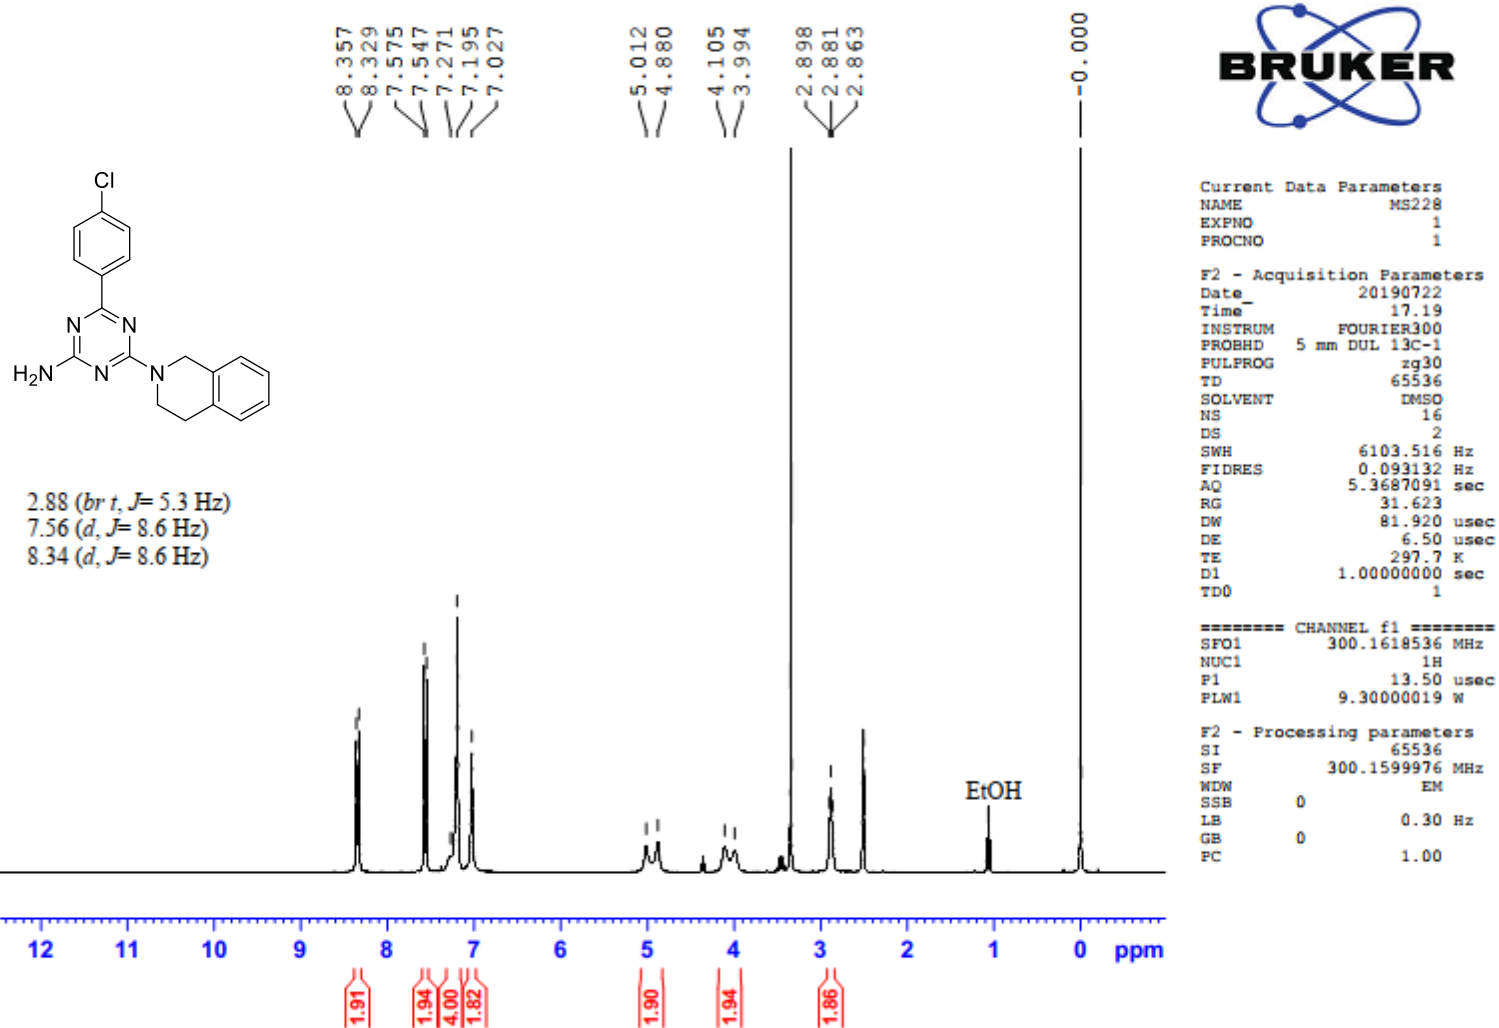

6-(4-Chlorophenyl)-4-(3,4-dihydroisoquinolin-2(1H)-yl)-1,3,5-triazine-2-amine (9{6,4})

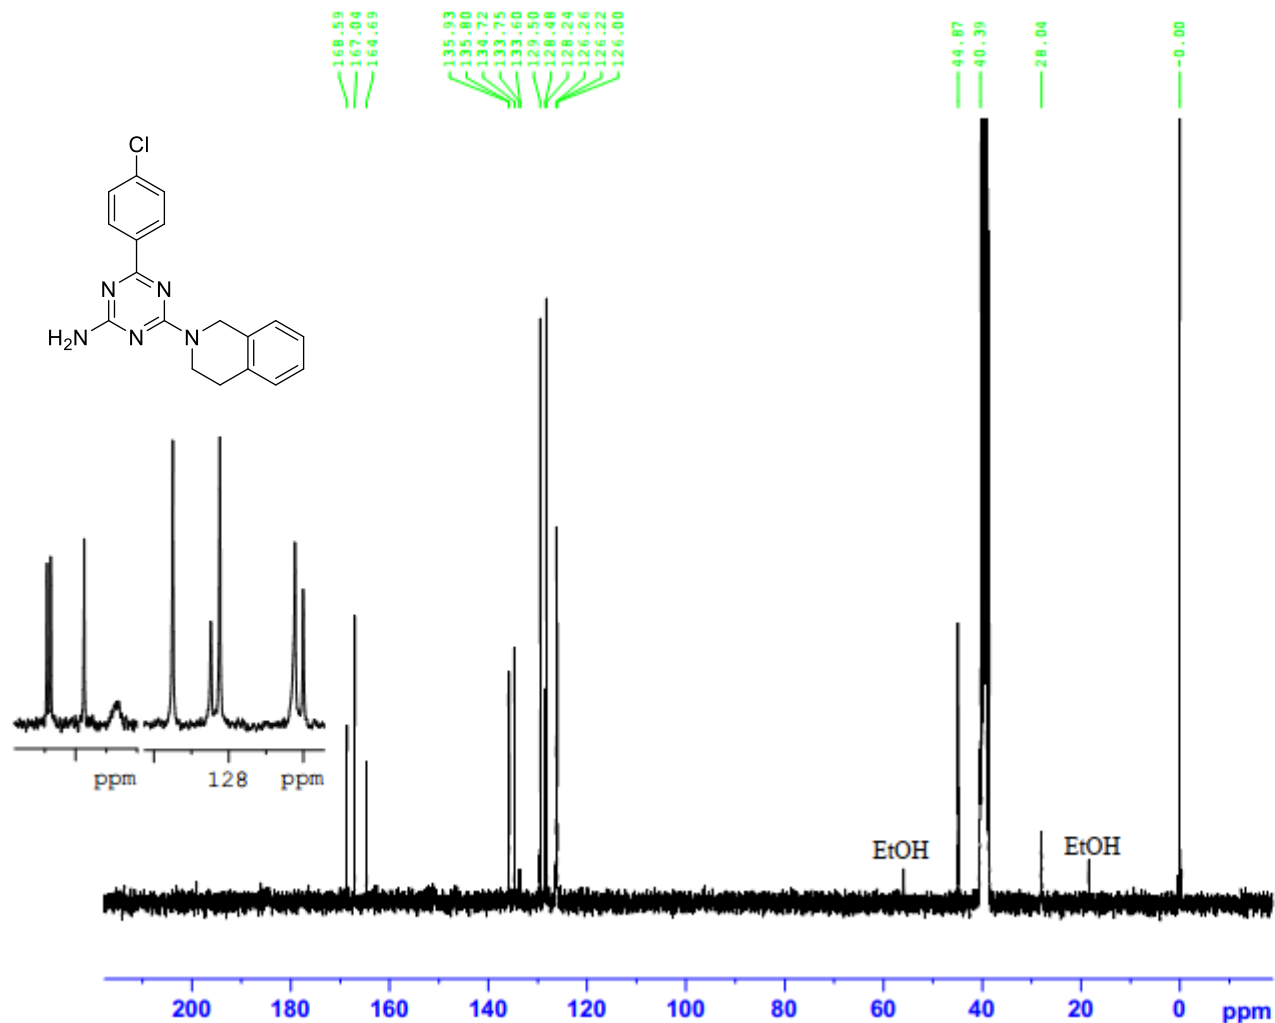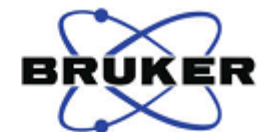

Current Data Parameters  
 NAME MS228  
 EXPNO 4  
 PROCNO 1

F2 - Acquisition Parameters  
 Date\_ 20190726  
 Time 1.04  
 INSTRUM FOURIER300  
 PROBHD 5 mm DUL 13C-1  
 PULPROG zgpg30  
 TD 65536  
 SOLVENT DMSO  
 NS 6144  
 DS 4  
 SWH 24414.063 Hz  
 FIDRES 0.372529 Hz  
 AQ 1.3421773 sec  
 RG 501.187  
 DW 20.480 usec  
 DE 6.50 usec  
 TE 300.3 K  
 D1 2.0000000 sec  
 D11 0.0300000 sec  
 D31 0.00001500 sec  
 D40 0.00439029 sec  
 I4 37  
 I5 53  
 P32 98.00 usec  
 TDO 6

----- CHANNEL f1 -----  
 SFO1 75.4828392 MHz  
 NUC1 13C  
 P1 15.00 usec  
 PLW1 22.00000000 W

----- CHANNEL f2 -----  
 SFO2 300.1612006 MHz  
 NUC2 1H  
 CPOPRG[2] waltz16  
 PCPD2 98.00 usec  
 PLM2 9.30000019 W  
 PLM12 0.29359001 W  
 PLM13 0.20359001 W

F2 - Processing parameters  
 SI 32768  
 SF 75.4753342 MHz  
 MDW EM  
 SSB 0  
 LB 1.00 Hz  
 GB 0  
 PC 1.40

6-(3-Methylphenyl)-4-(3,4-dihydroisoquinolin-2(1H)-yl)-1,3,5-triazine-2-amine (9{6,5})

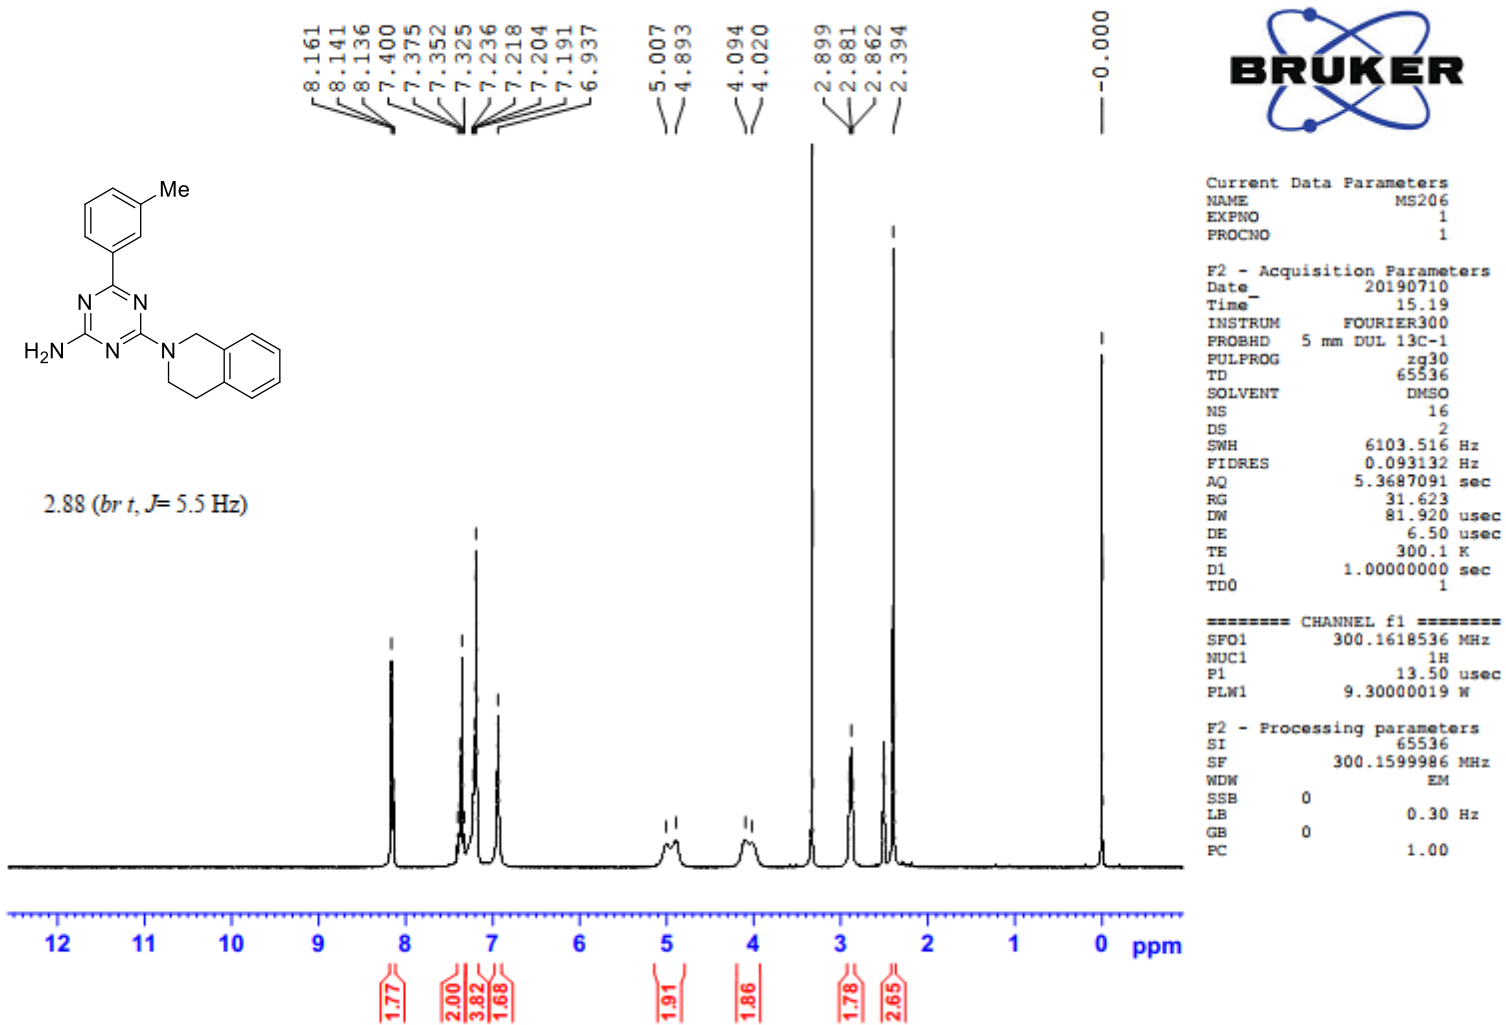

6-(3-Methylphenyl)-4-(3,4-dihydroisoquinolin-2(1*H*)-yl)-1,3,5-triazine-2-amine (9{6,5})

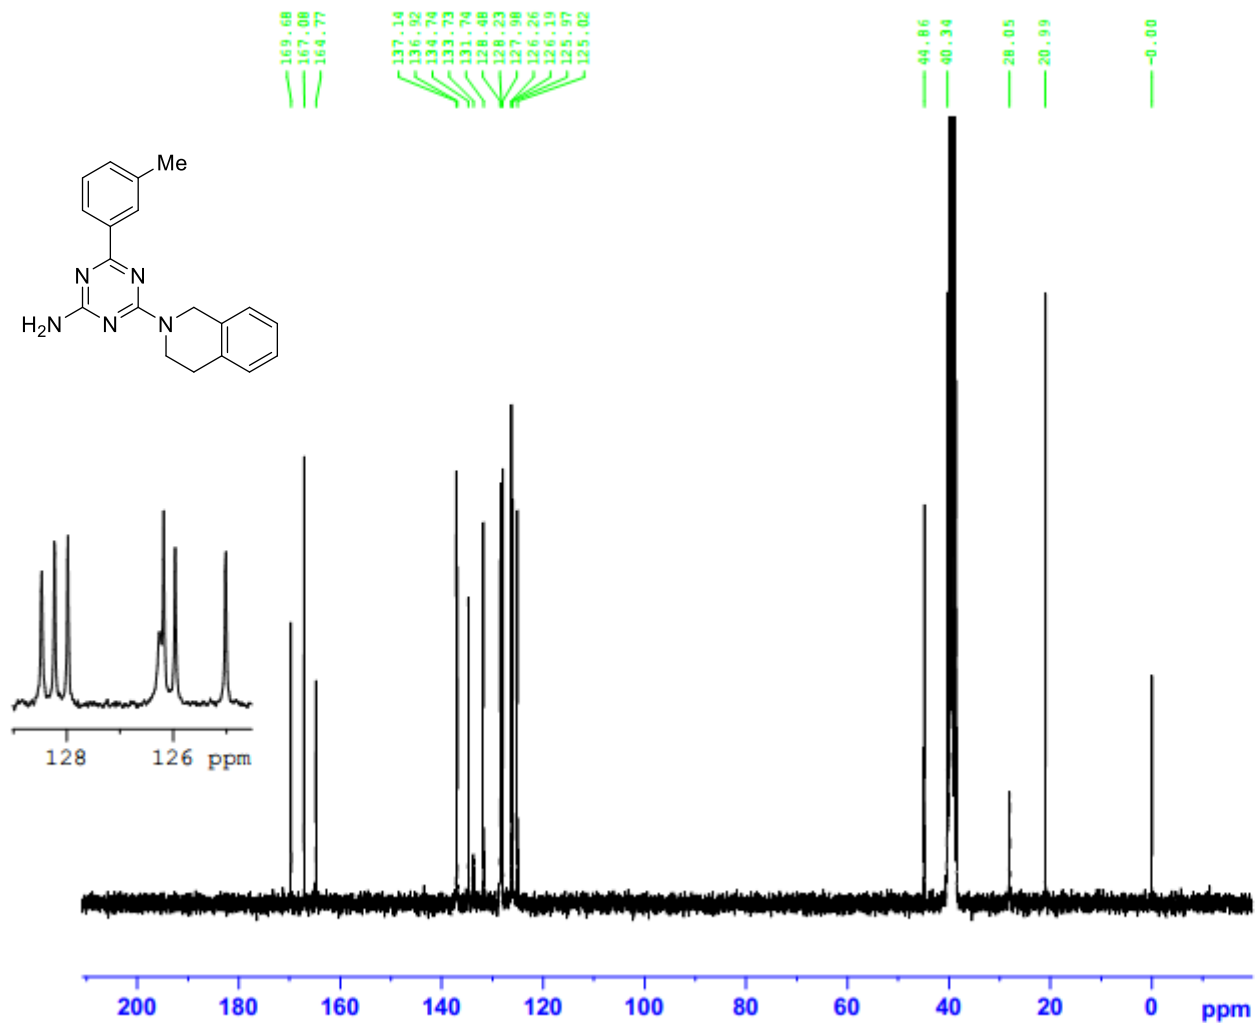

**BRUKER**

Current Data Parameters  
NAME MS206  
EXPNO 2  
PROCNO 1

F2 - Acquisition Parameters  
Date\_ 20190710  
Time\_ 21.59  
INSTRUM FOURIER300  
PROBHD 5 mm DUL 13C-1  
PULPROG zgpg30  
TD 65536  
SOLVENT DMSO  
NS 4096  
DS 4  
SWH 24414.063 Hz  
FIDRES 0.372529 Hz  
AQ 1.3421773 sec  
RG 501.187  
EW 20.480 usec  
DE 6.50 usec  
TE 300.1 K  
D1 2.0000000 sec  
D11 0.0300000 sec  
D31 0.0000150 sec  
D40 0.00439029 sec  
L4 37  
L5 53  
P32 98.00 usec  
TD0 4

----- CHANNEL f1 -----  
SFO1 75.4828392 MHz  
NUC1 13C  
P1 15.00 usec  
PLW1 22.00000000 W

----- CHANNEL f2 -----  
SFO2 300.1612006 MHz  
NUC2 1H  
CPDPRG[2] waltz16  
PCPD2 98.00 usec  
PLW2 9.30000019 W  
PLW12 0.29359001 W  
PLW13 0.20359001 W

F2 - Processing parameters  
SI 32768  
SF 75.4753348 MHz  
WDW EM  
SSB 0  
LB 1.00 Hz  
GB 0  
PC 1.40

6-(4-Methylphenyl)-4-(3,4-dihydroisoquinolin-2(1H)-yl)-1,3,5-triazine-2-amine (**9**{6,6})

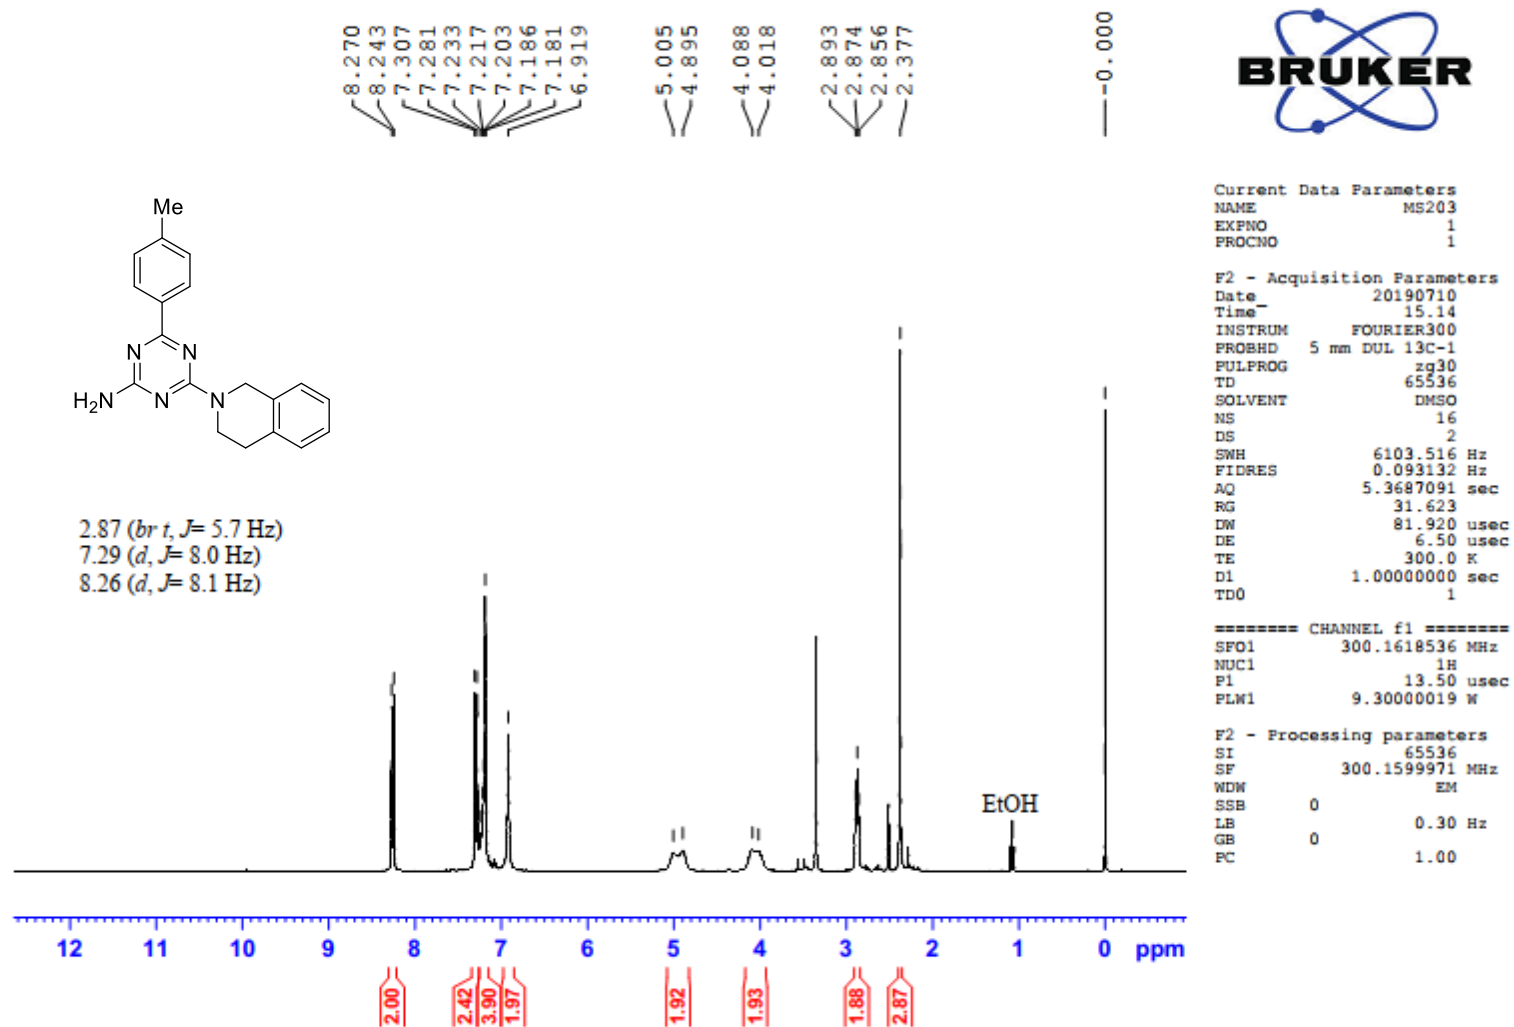



6-(4-Methylphenyl)-4-(3,4-dihydroisoquinolin-2(1H)-yl)-1,3,5-triazine-2-amine (9{6,6})

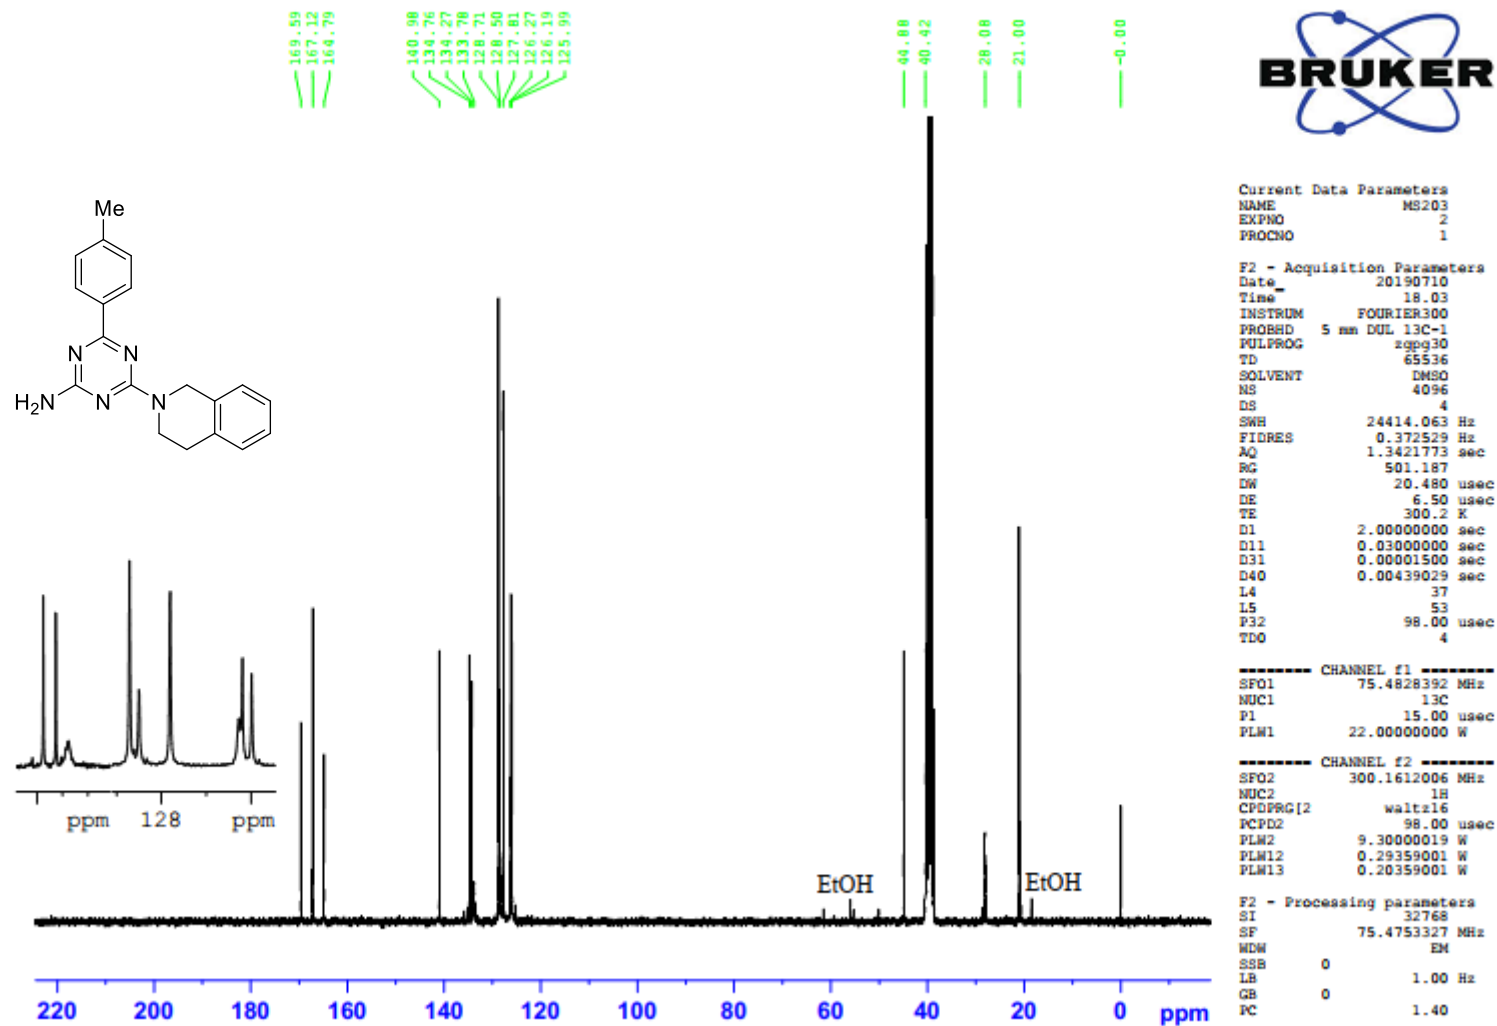

6-[4-(*tert*-Butyl)phenyl]-4-(3,4-dihydroisoquinolin-2(1*H*)-yl)-1,3,5-triazine-2-amine (9{6,7})

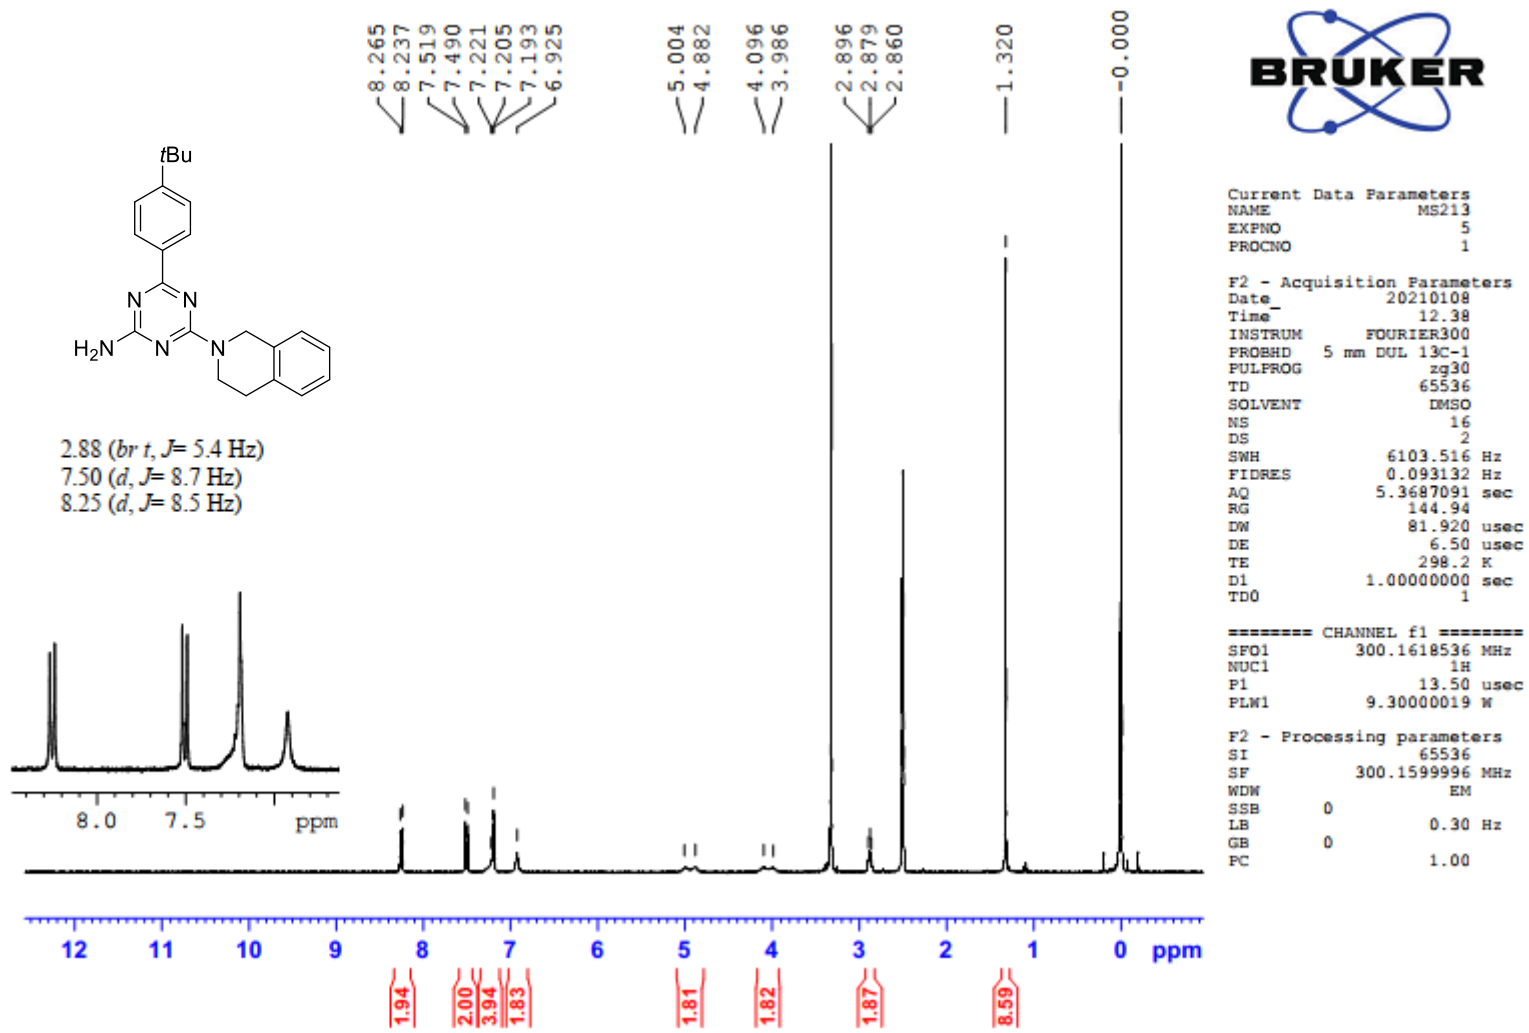

6-[4-(*tert*-Butyl)phenyl]-4-(3,4-dihydroisoquinolin-2(1*H*)-yl)-1,3,5-triazine-2-amine (9{6,7})

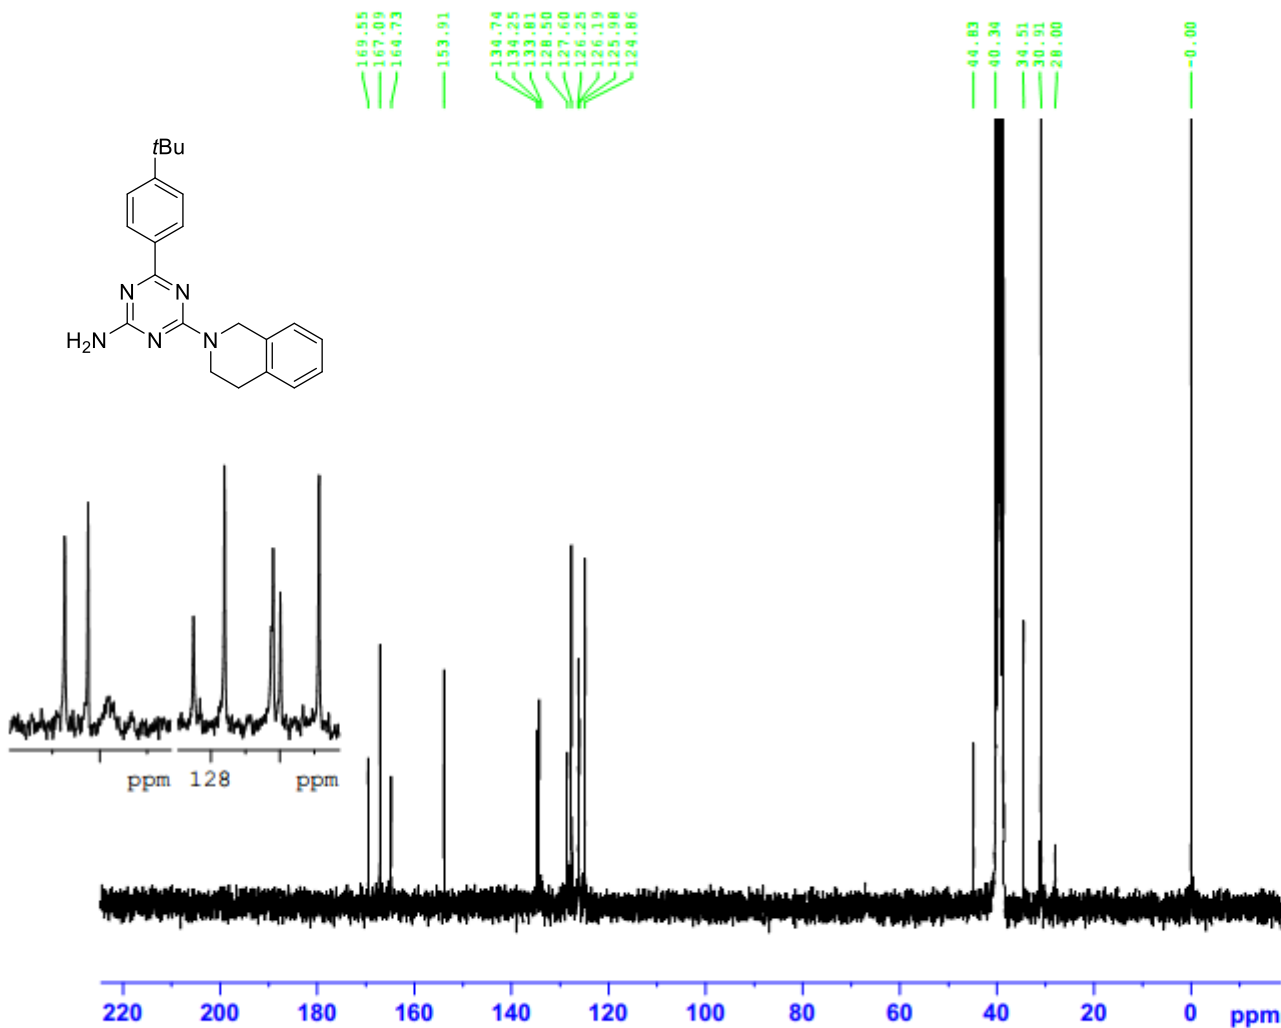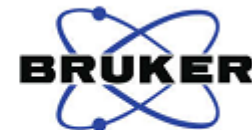

Current Data Parameters  
NAME MS213  
EXPNO 3  
PROCNO 1

F2 - Acquisition Parameters  
Date\_ 20201210  
Time\_ 17.32  
INSTRUM FOURIER300  
PROBHD 5 mm DUL 13C-1  
PULPROG zgpg30  
TD 65536  
SOLVENT DMSO  
NS 12288  
DS 4  
SWH 24414.063 Hz  
FIDRES 0.372529 Hz  
AQ 1.3421773 sec  
RG 501.187  
DW 20.480 usec  
DE 6.50 usec  
TE 298.2 K  
D1 2.00000000 sec  
D11 0.03000000 sec  
D31 0.00001300 sec  
D40 0.02898005 sec  
L4 40  
L5 57  
P32 90.00 usec  
TDO 12

----- CHANNEL f1 -----  
SFO1 75.4828392 MHz  
NUC1 13C  
P1 13.00 usec  
PLW1 22.00000000 W

----- CHANNEL f2 -----  
SFO2 300.1612006 MHz  
NUC2 1H  
CPODPRG[2] waitz16  
PCPD2 90.00 usec  
PLW2 9.30000019 W  
PLW12 0.25149000 W  
PLW13 0.12650000 W

F2 - Processing parameters  
SI 32768  
SF 75.4753350 MHz  
WDW EM  
SSB 0  
LB 1.00 Hz  
GB 0  
PC 1.40

6-[4-(*N,N*-Dimethylamino)phenyl]-4-(3,4-dihydroisoquinolin-2(1*H*)-yl)-1,3,5-triazine-2-amine (9{6,8})

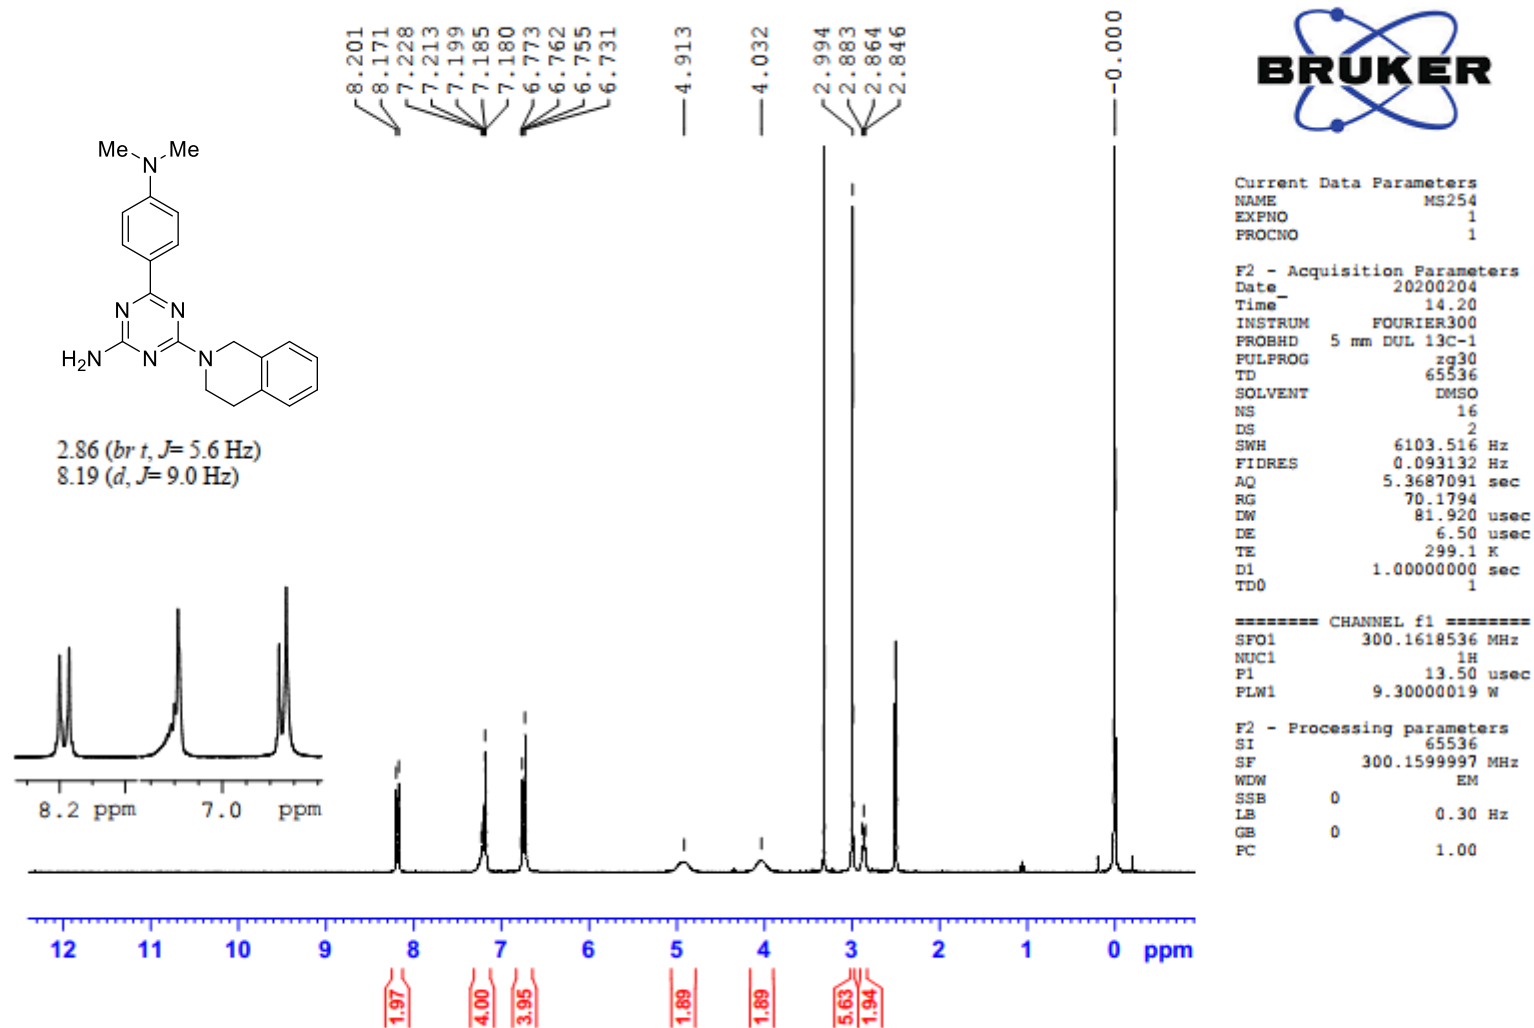

6-[4-(*N,N*-Dimethylamino)phenyl]-4-(3,4-dihydroisoquinolin-2(1*H*)-yl)-1,3,5-triazine-2-amine (9{6,8})

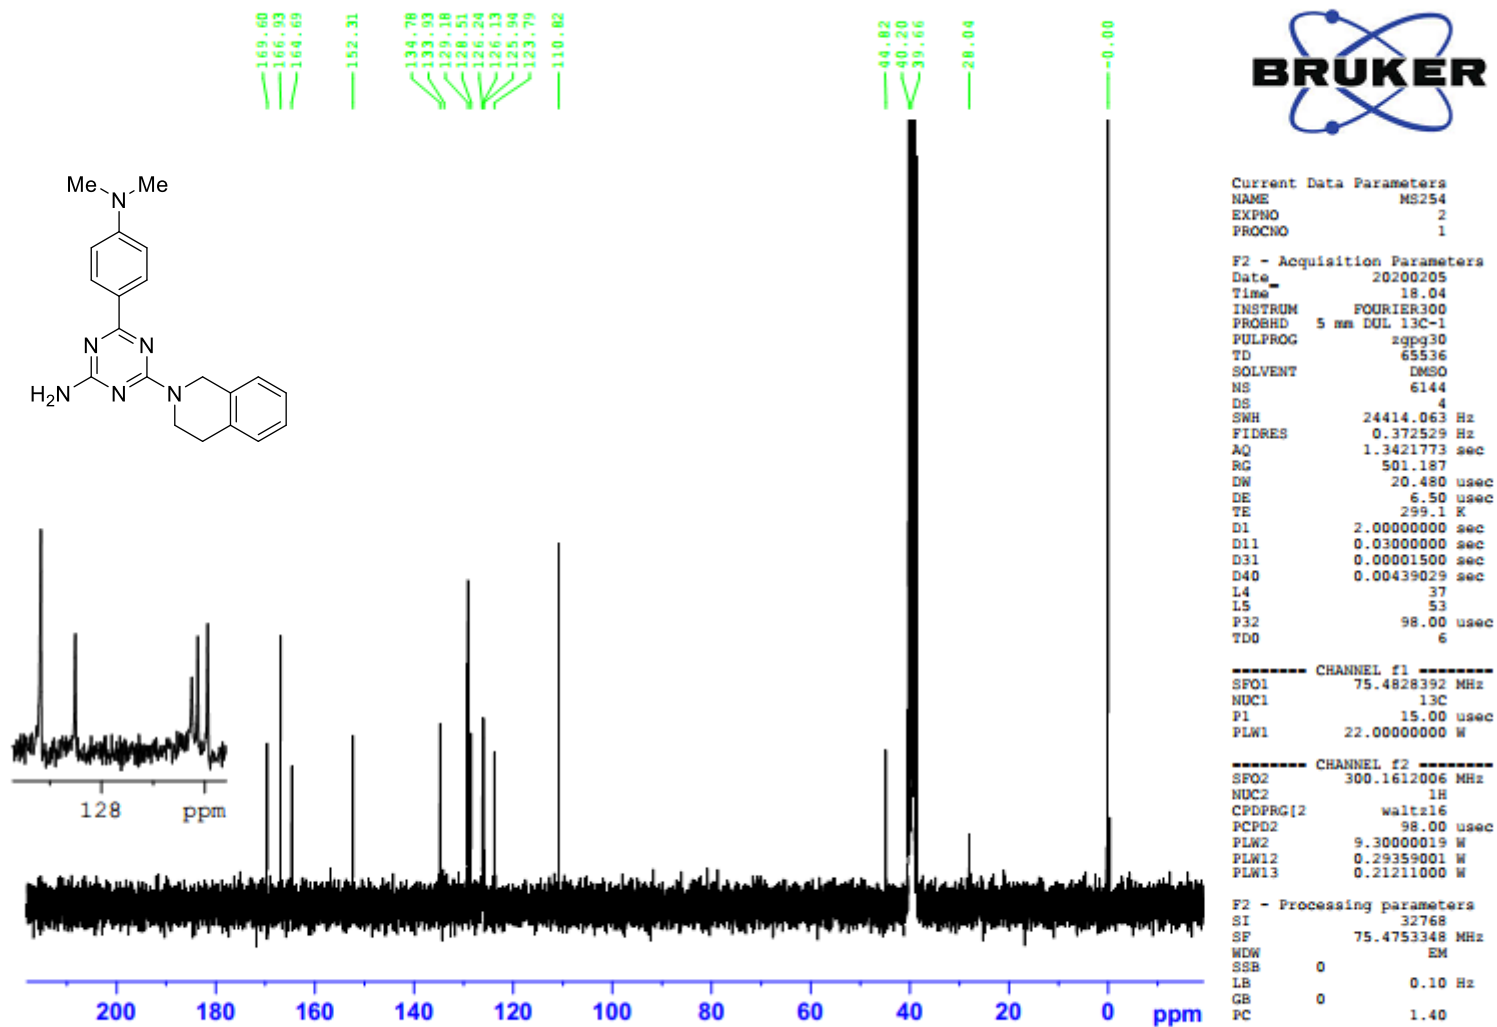

6-(4-Methoxyphenyl)-4-(3,4-dihydroisoquinolin-2(1H)-yl)-1,3,5-triazine-2-amine (9{6,9})

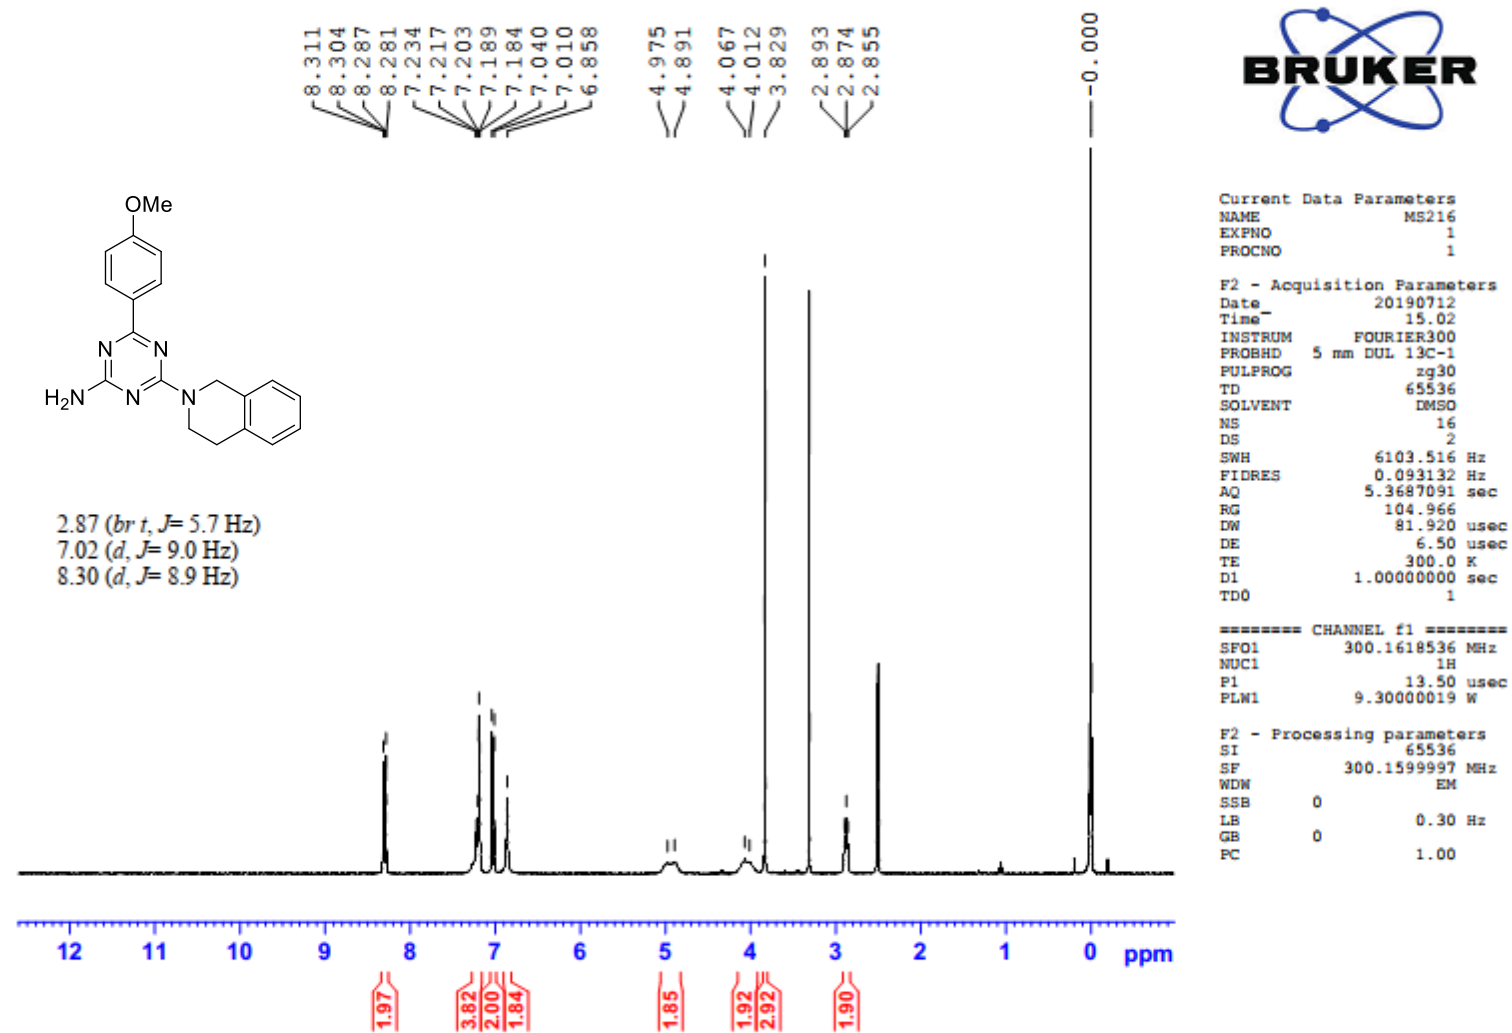

6-(4-Methoxyphenyl)-4-(3,4-dihydroisoquinolin-2(1H)-yl)-1,3,5-triazine-2-amine (9{6,9})

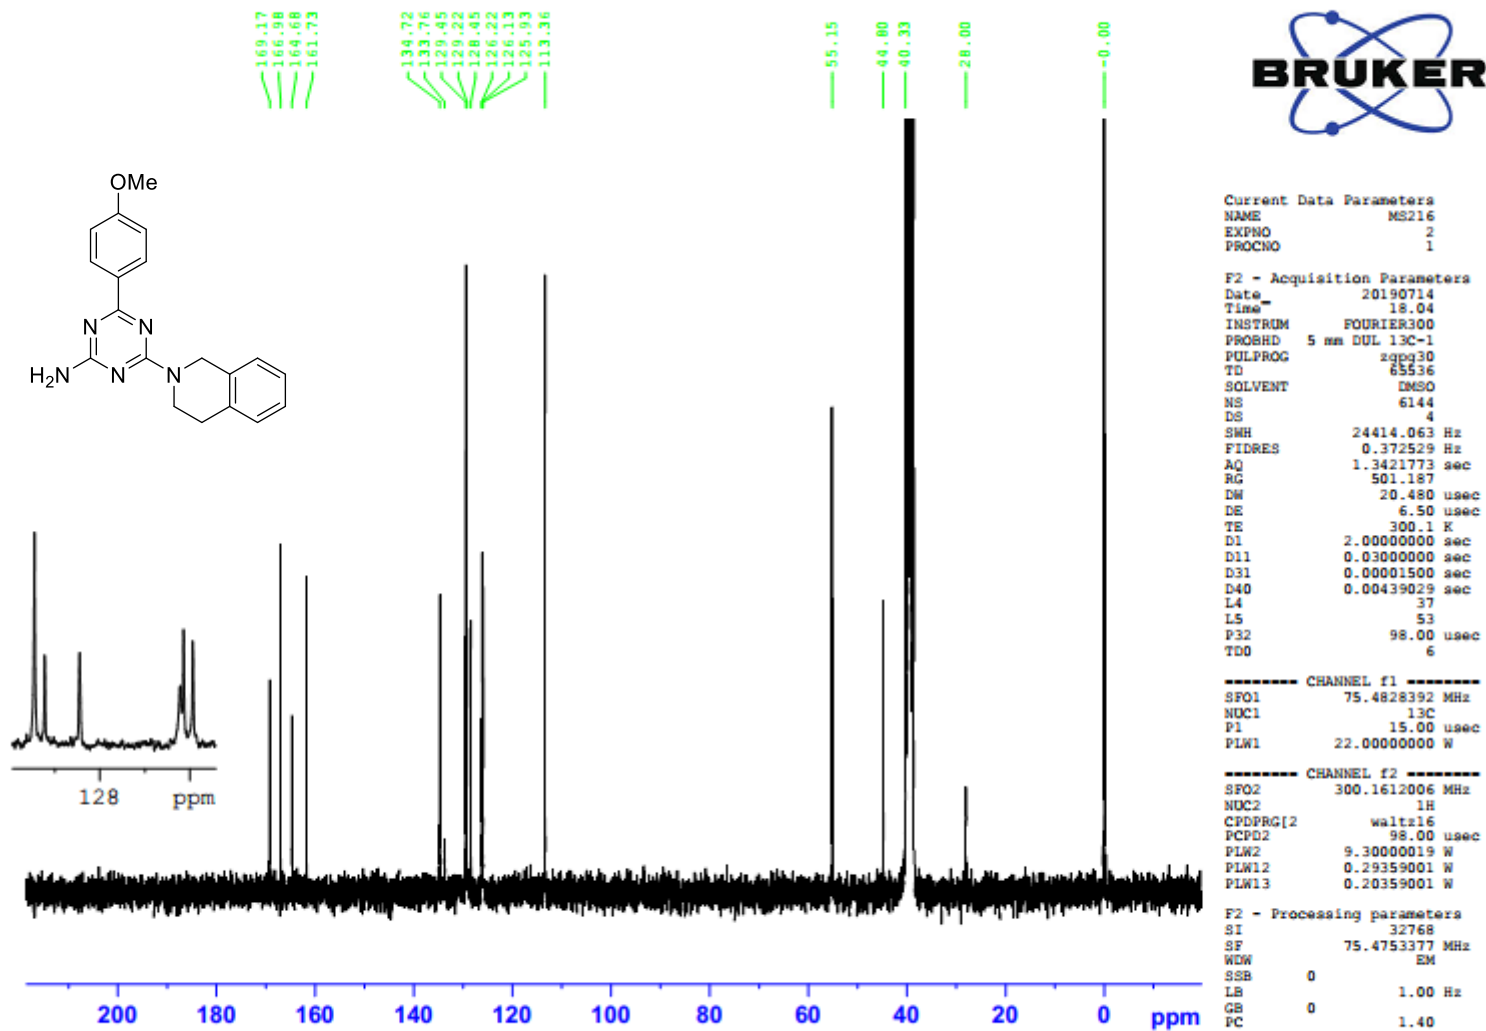

6-[4-(Trifluoromethyl)phenyl]-4-(3,4-dihydroisoquinolin-2(1H)-yl)-1,3,5-triazine-2-amine (9{6,11})

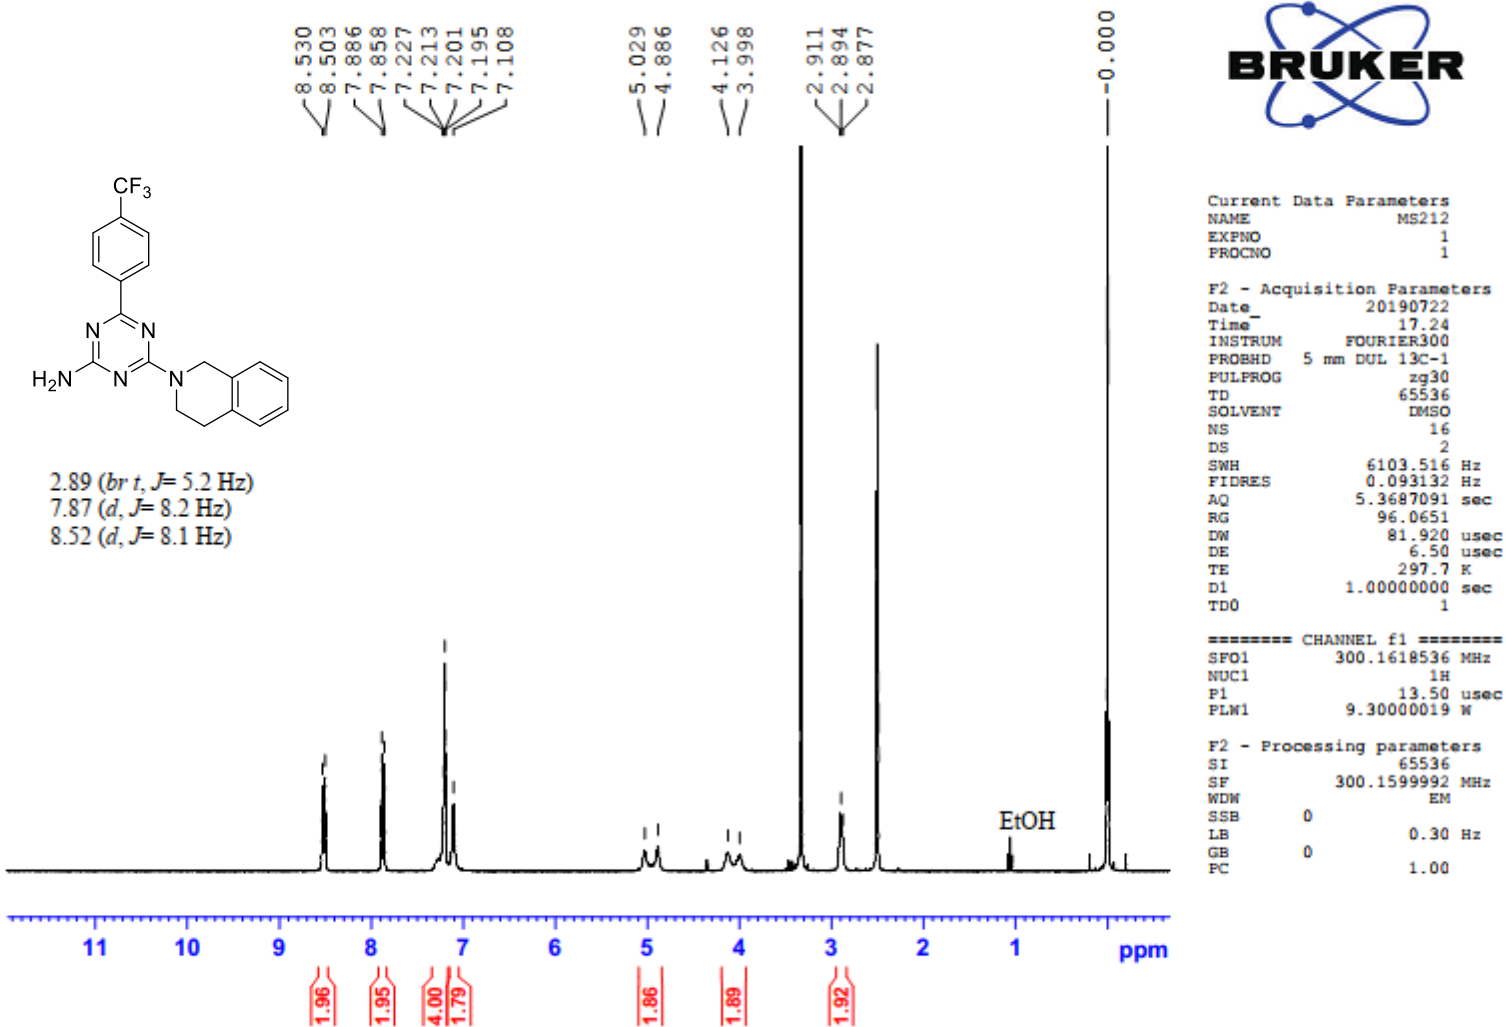



6-[4-(Trifluoromethyl)phenyl]-4-(3,4-dihydroisoquinolin-2(1H)-yl)-1,3,5-triazine-2-amine (**9**{6,11})

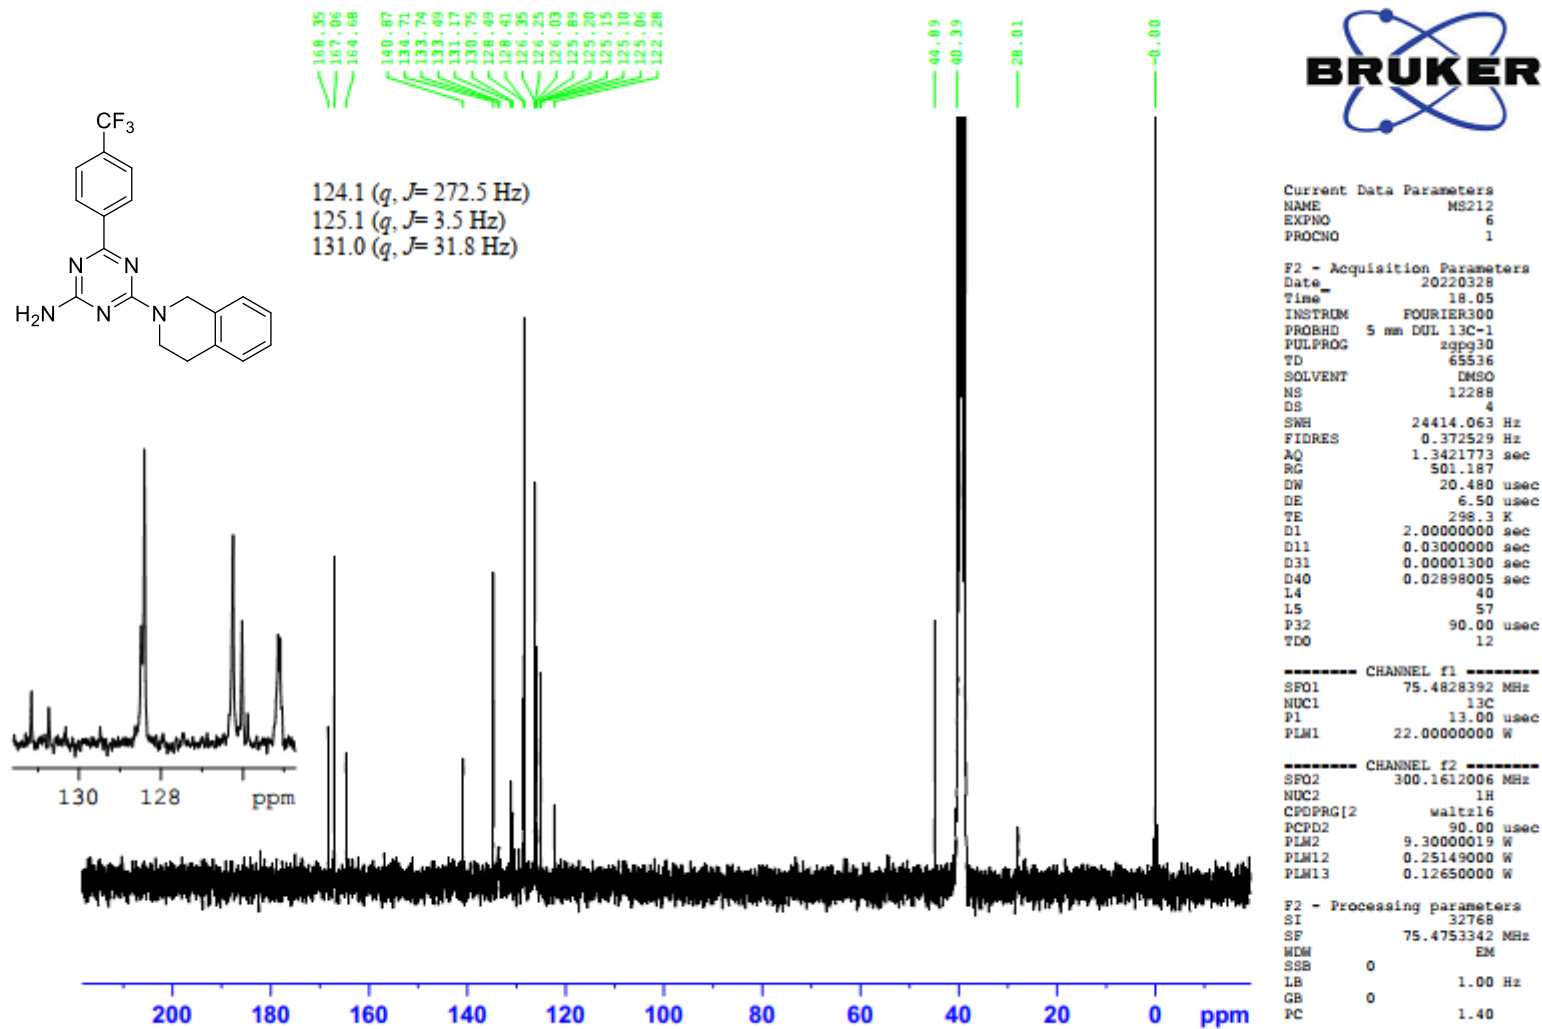

6-[4-(Trifluoromethoxy)phenyl]-4-(3,4-dihydroisoquinolin-2(1H)-yl)-1,3,5-triazine-2-amine (**9**{6,12})

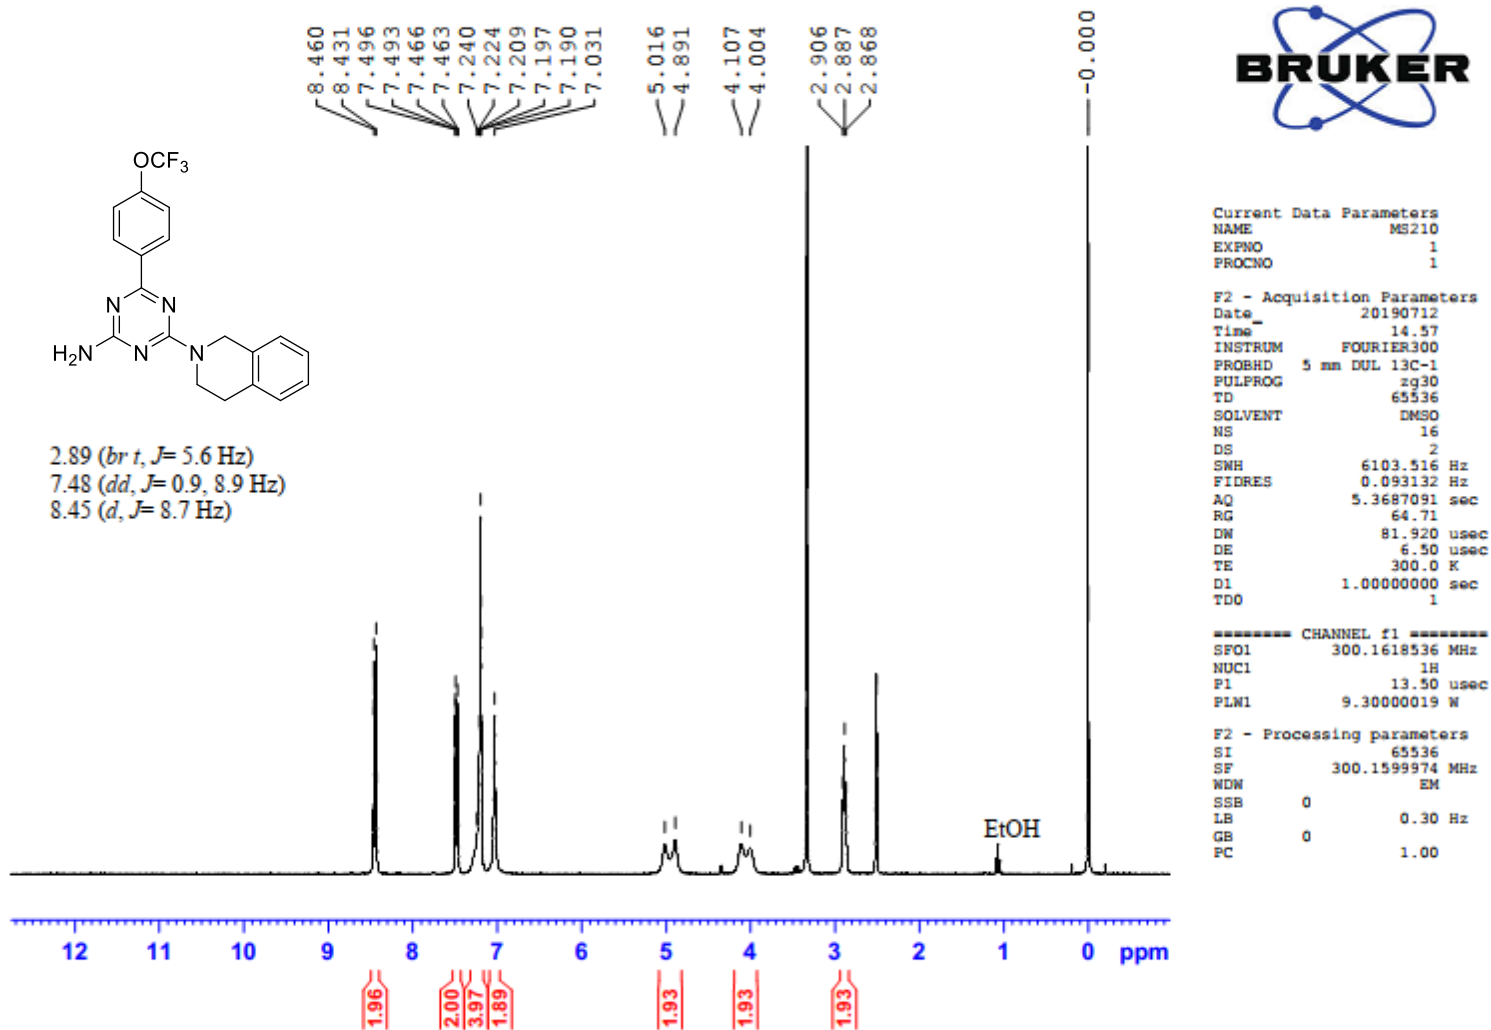

6-[4-(Trifluoromethoxy)phenyl]-4-(3,4-dihydroisoquinolin-2(1H)-yl)-1,3,5-triazine-2-amine (9{6,12})

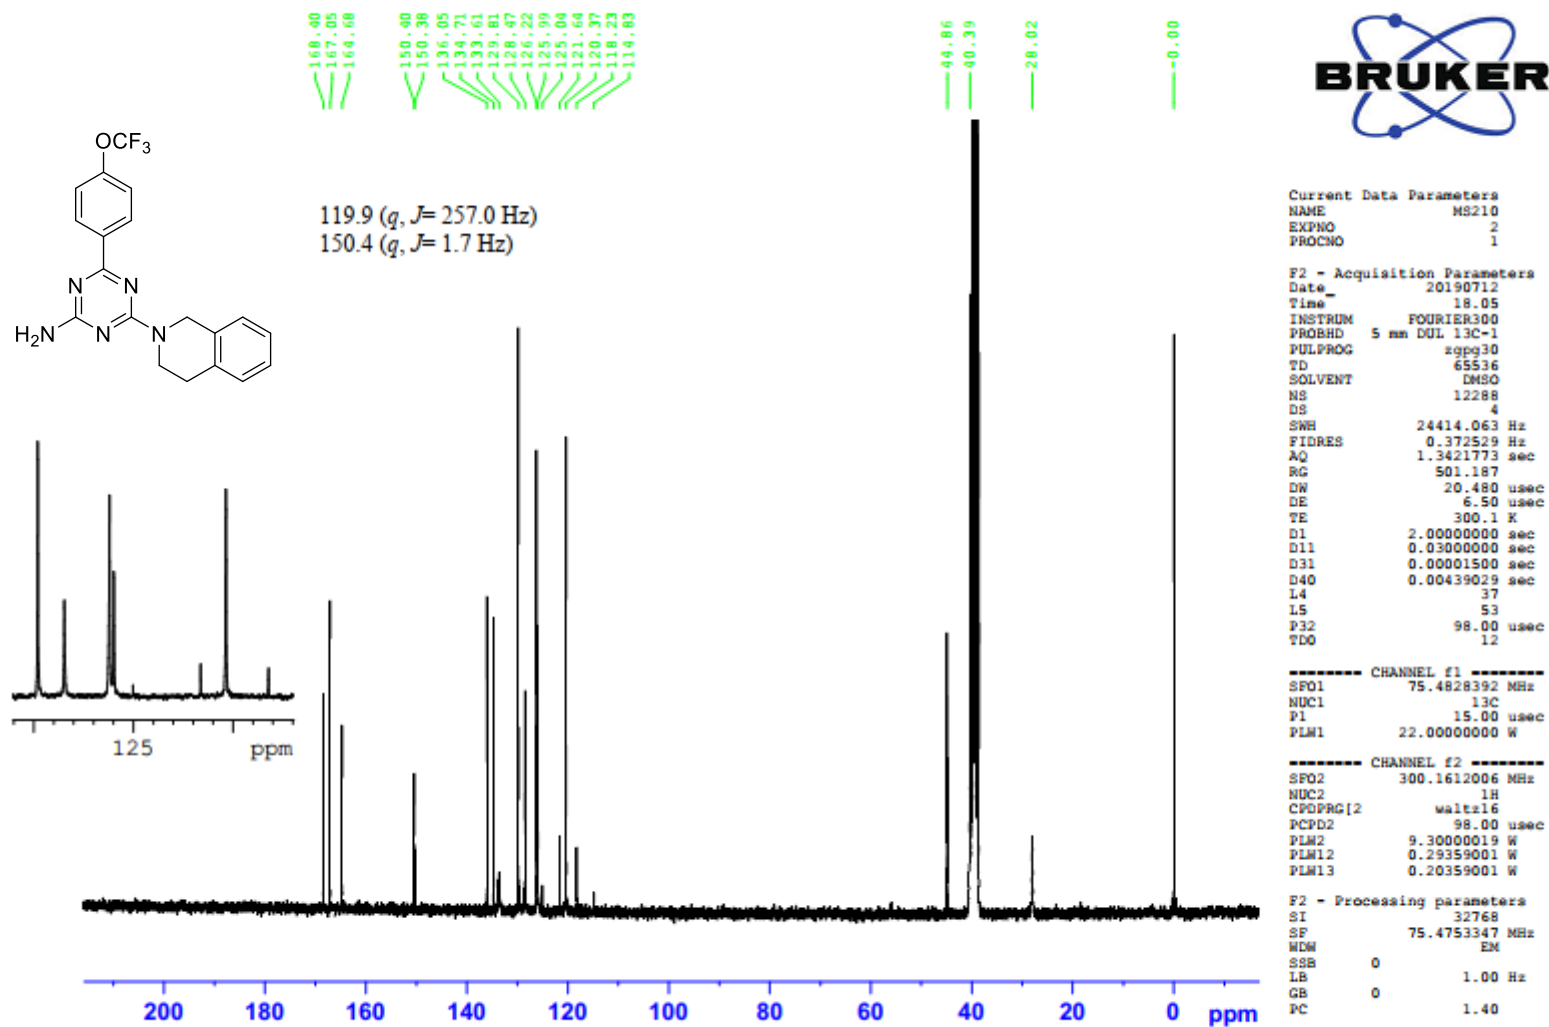

4-(3,4-Dihydroisoquinolin-2(1H)-yl)-6-(3-phenoxyphenyl)-1,3,5-triazine-2-amine (9{6,13})

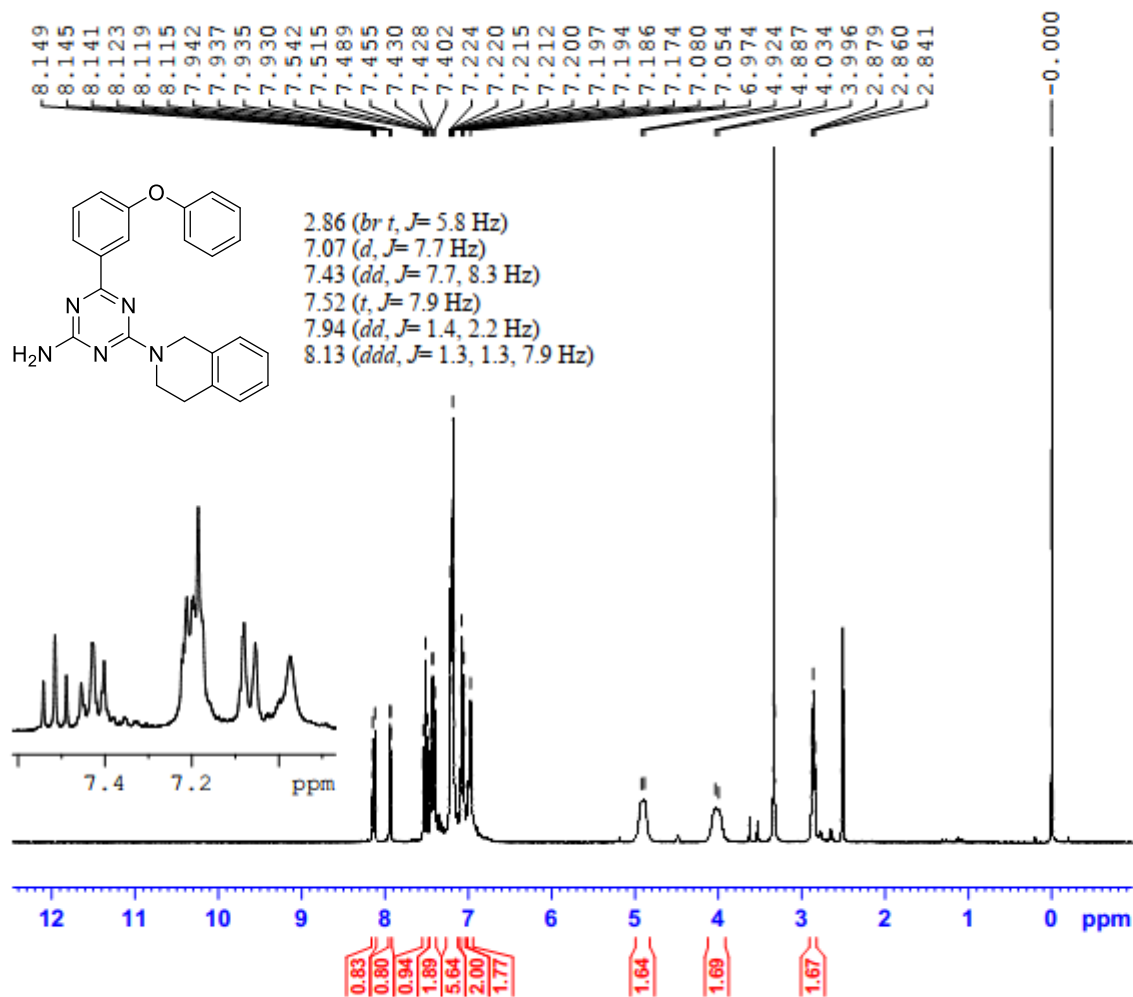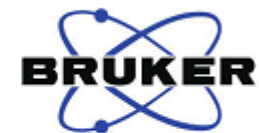

Current Data Parameters  
 NAME MS208  
 EXPNO 1  
 PROCNO 1

F2 - Acquisition Parameters  
 Date\_ 20190710  
 Time 15.24  
 INSTRUM FOURIER300  
 PROBHD 5 mm DUL 13C-1  
 PULPROG zg30  
 TD 65536  
 SOLVENT DMSO  
 NS 16  
 DS 2  
 SWH 6103.516 Hz  
 FIDRES 0.093132 Hz  
 AQ 5.3687091 sec  
 RG 31.623  
 DW 81.920 usec  
 DE 6.50 usec  
 TE 300.0 K  
 D1 1.00000000 sec  
 TDO 1

===== CHANNEL f1 =====  
 SFO1 300.1618536 MHz  
 NUC1 1H  
 P1 13.50 usec  
 PLW1 9.30000019 W

F2 - Processing parameters  
 SI 65536  
 SF 300.1599983 MHz  
 WDW EM  
 SSB 0  
 LB 0.30 Hz  
 GB 0  
 PC 1.00

4-(3,4-Dihydroisoquinolin-2(1H)-yl)-6-(3-phenoxyphenyl)-1,3,5-triazine-2-amine (9{6,13})

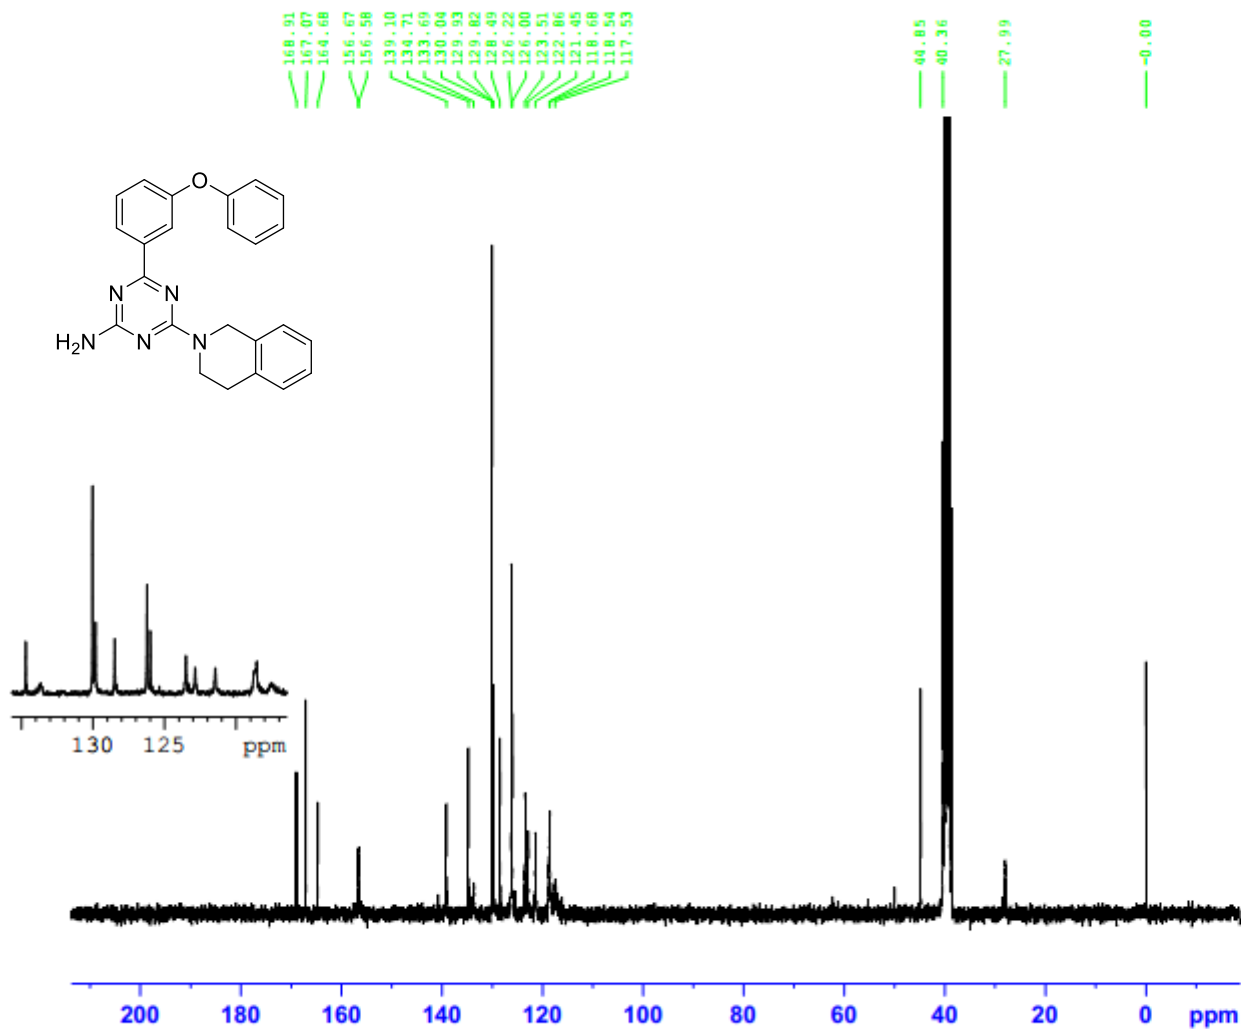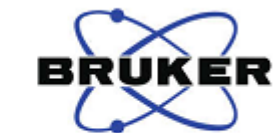

Current Data Parameters  
NAME MS208  
EXPNO 2  
PROCNO 1

F2 - Acquisition Parameters  
Date\_ 20190711  
Time 1.55  
INSTRUM FOURIER300  
PROBHD 5 mm DUL 13C-1  
PULPROG zgpg30  
TD 65536  
SOLVENT DMSO  
NS 4096  
DS 4  
SWH 24414.063 Hz  
FIDRES 0.372529 Hz  
AQ 1.3421773 sec  
RG 501.187  
DW 20.480 usec  
DE 6.50 usec  
TE 300.1 K  
D1 2.00000000 sec  
D11 0.03000000 sec  
D31 0.00001500 sec  
D40 0.00439029 sec  
L4 37  
L5 53  
P32 98.00 usec  
TDO 4

----- CHANNEL f1 -----  
SFO1 75.4828392 MHz  
NUC1 13C  
P1 15.00 usec  
PLW1 22.00000000 W

----- CHANNEL f2 -----  
SFO2 300.1612006 MHz  
NUC2 1H  
CPDPRG2 waltz16  
PCPD2 98.00 usec  
PLW2 9.30000019 W  
PLW12 0.29359001 W  
PLW13 0.20359001 W

F2 - Processing parameters  
SI 32768  
SF 75.4753338 MHz  
WDW EM  
SSB 0  
LB 1.00 Hz  
GB 0  
PC 1.40

6-(3-(Benzyloxy)phenyl)-4-(3,4-dihydroisoquinolin-2(1H)-yl)-1,3,5-triazine-2-amine (9{6,14})

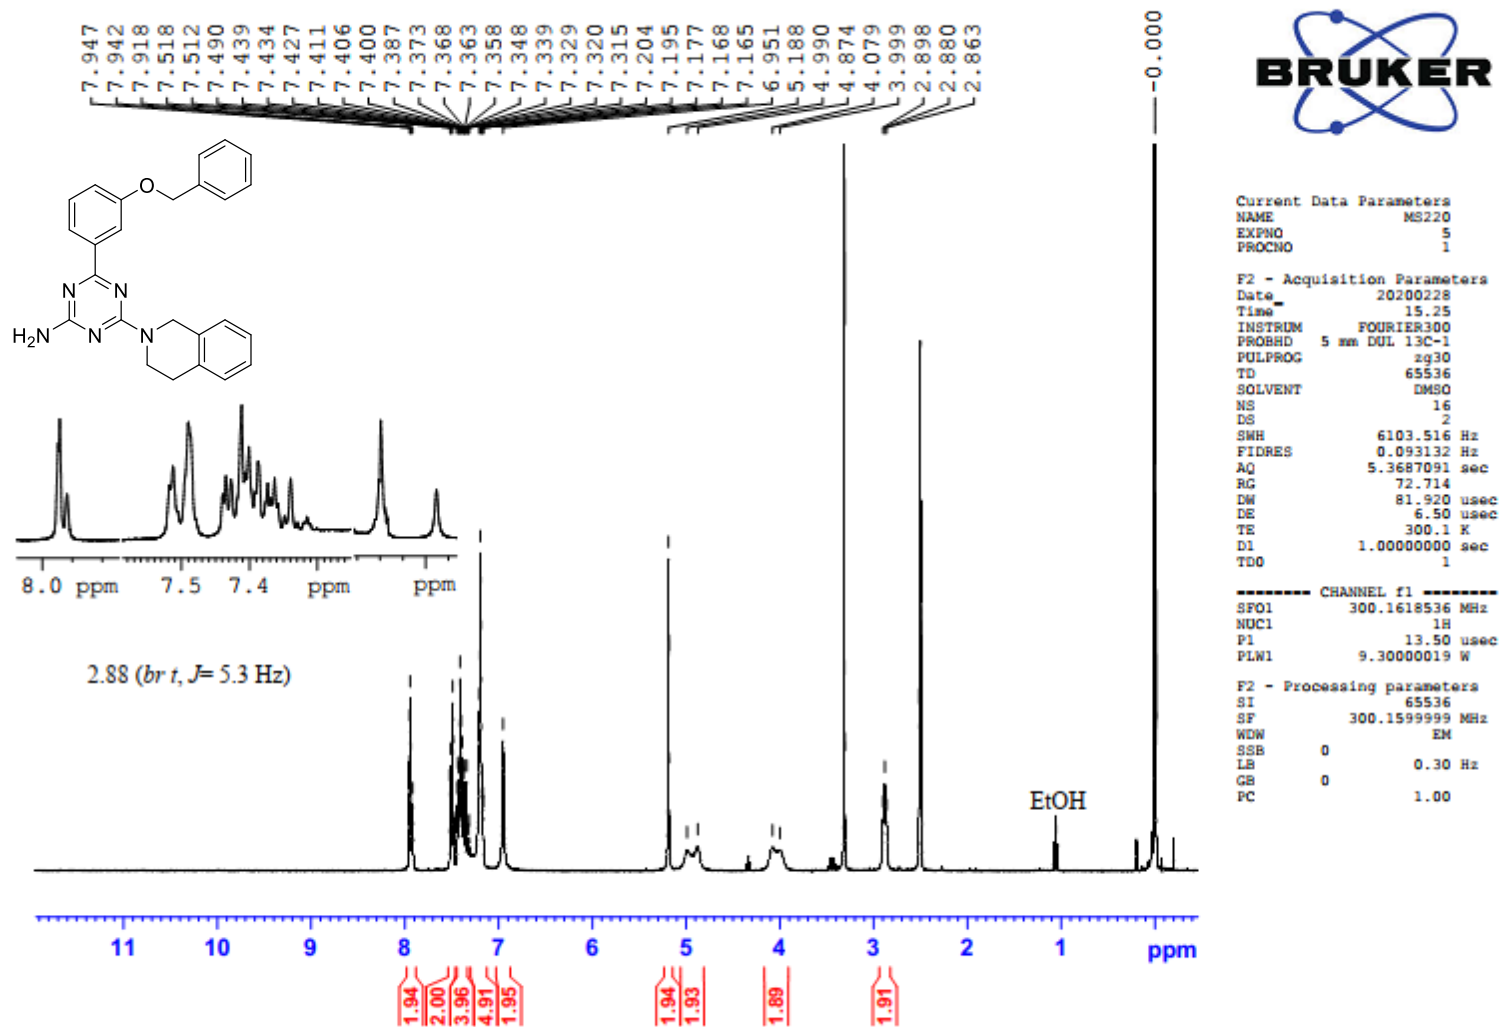

6-(3-(Benzyloxy)phenyl)-4-(3,4-dihydroisoquinolin-2(1H)-yl)-1,3,5-triazine-2-amine (9{6,14})

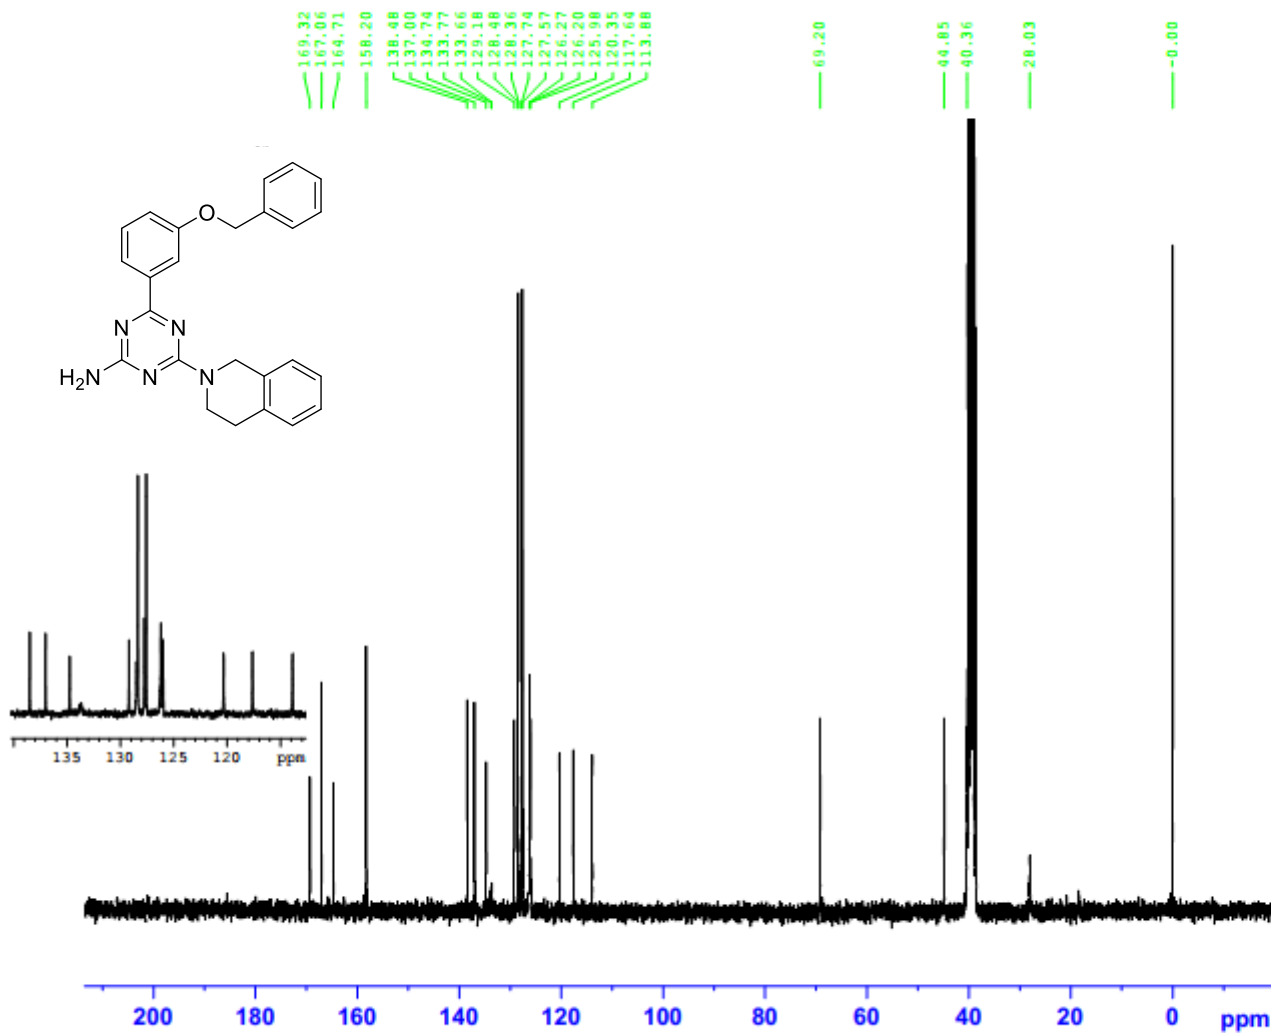

Current Data Parameters

|        |       |
|--------|-------|
| NAME   | MS220 |
| EXPNO  | 4     |
| PROCNO | 1     |

F2 - Acquisition Parameters

|         |                |
|---------|----------------|
| Date_   | 20200208       |
| Time    | 1.04           |
| INSTRUM | FOURIER300     |
| PROBHD  | 5 mm DUL 13C-1 |
| PULPROG | zgpg30         |
| TD      | 65536          |
| SOLVENT | DMSO           |
| NS      | 6144           |
| DS      | 4              |
| SWH     | 24414.063 Hz   |
| FIDRES  | 0.372529 Hz    |
| AQ      | 1.3421773 sec  |
| RG      | 501.187        |
| DW      | 20.480 usec    |
| DE      | 6.50 usec      |
| TE      | 300.1 K        |
| D1      | 2.0000000 sec  |
| D11     | 0.0300000 sec  |
| D31     | 0.0000150 sec  |
| D40     | 0.00439029 sec |
| L4      | 37             |
| L5      | 53             |
| P32     | 98.00 usec     |
| TDO     | 6              |

----- CHANNEL f1 -----

|      |                |
|------|----------------|
| SFO1 | 75.4828392 MHz |
| NUC1 | 13C            |
| P1   | 15.00 usec     |
| PLW1 | 22.00000000 W  |

----- CHANNEL f2 -----

|           |                 |
|-----------|-----------------|
| SFO2      | 300.1612006 MHz |
| NUC2      | 1H              |
| CPDPRG[2] | waltz16         |
| PCPD2     | 98.00 usec      |
| PLW2      | 9.30000019 W    |
| PLW12     | 0.29359001 W    |
| PLW13     | 0.21211000 W    |

F2 - Processing parameters

|     |                |
|-----|----------------|
| SI  | 32768          |
| SF  | 75.4753350 MHz |
| WDW | EM             |
| SSB | 0              |
| LB  | 1.00 Hz        |
| GB  | 0              |
| PC  | 1.40           |

6-(4-(Benzyloxy)phenyl)-4-(3,4-dihydroisoquinolin-2(1H)-yl)-1,3,5-triazine-2-amine (9{6,15})

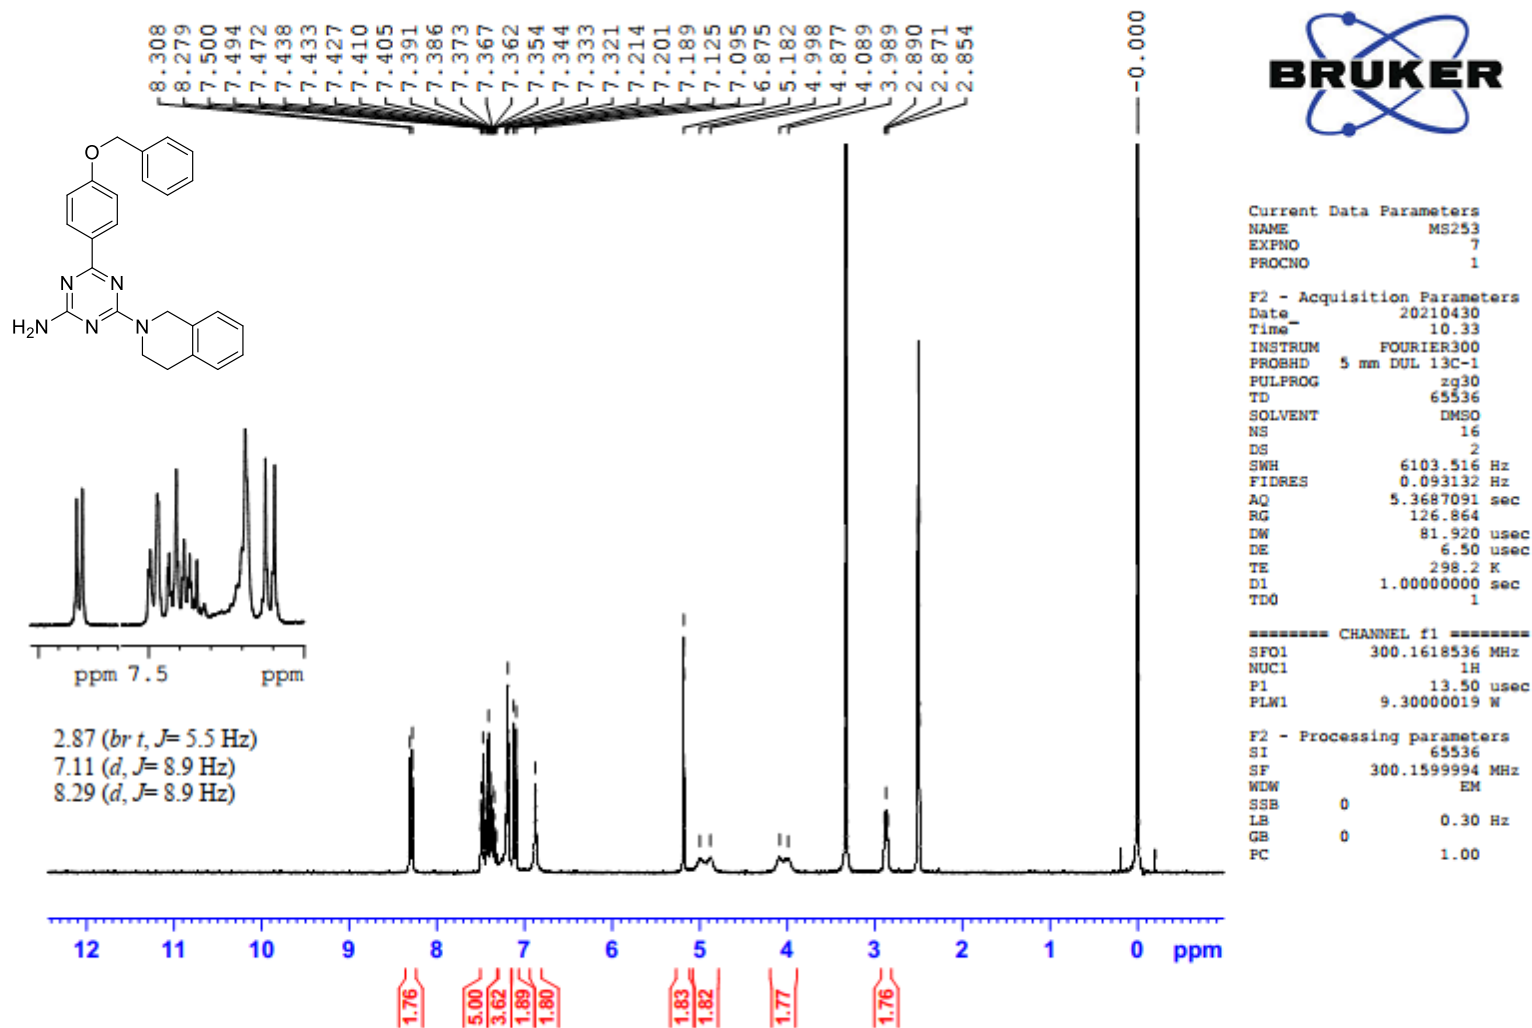



6-(4-(Benzyloxy)phenyl)-4-(3,4-dihydroisoquinolin-2(1H)-yl)-1,3,5-triazine-2-amine (9{6,15})

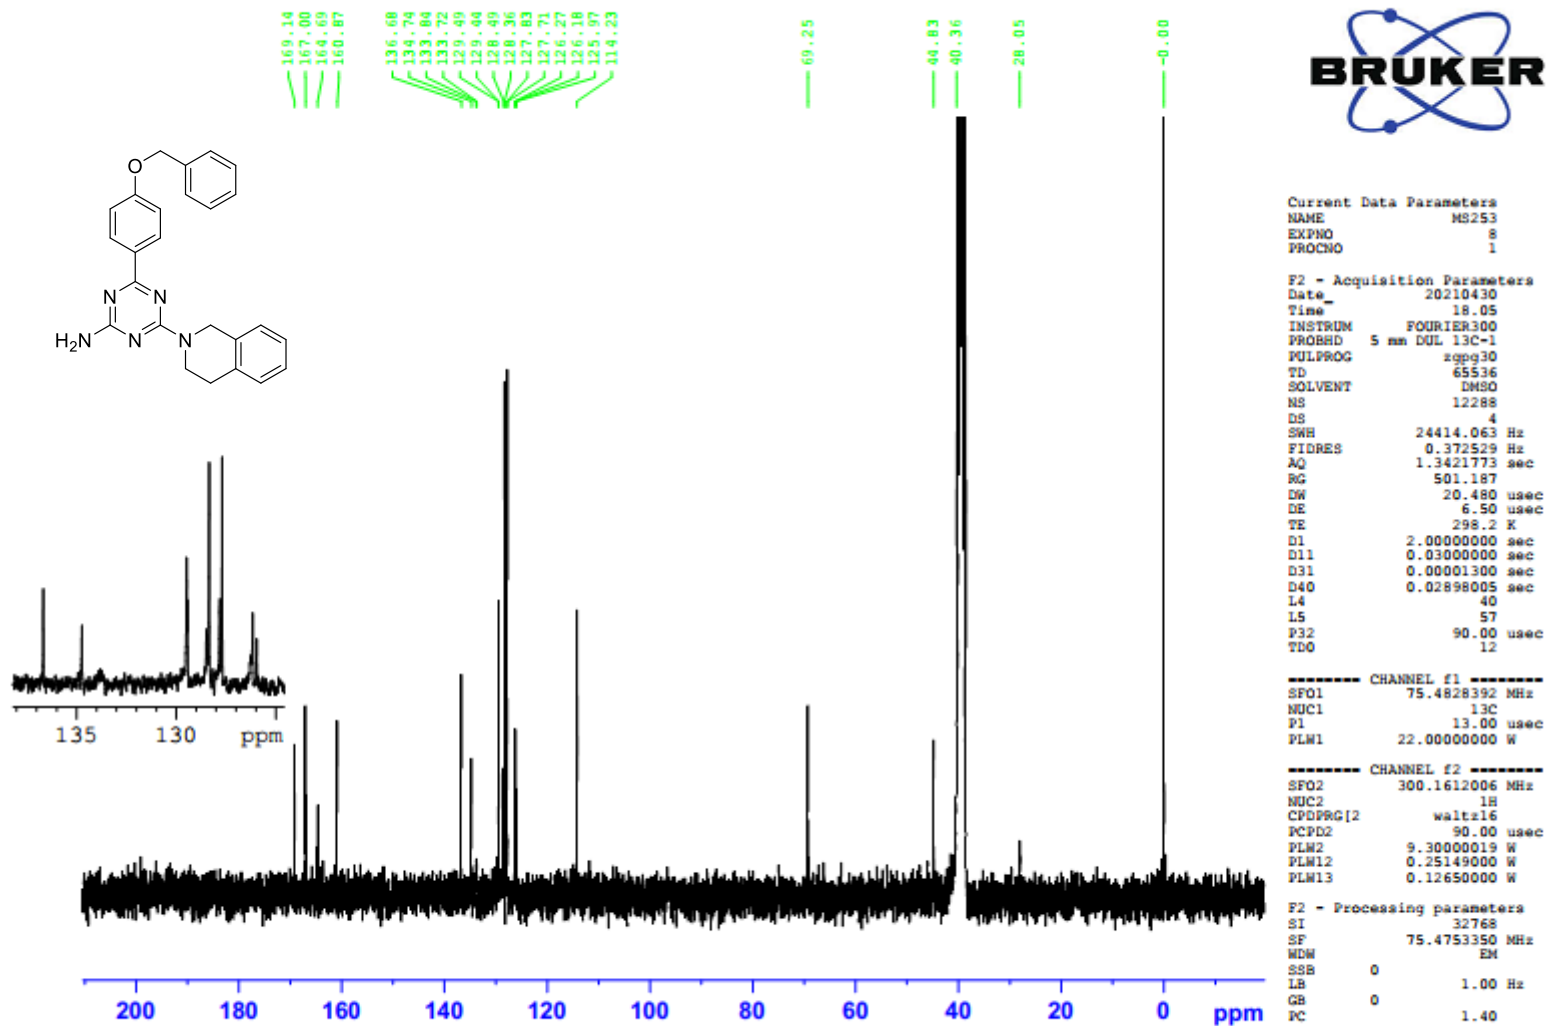

6-(3,4-Dimethoxyphenyl)-4-(3,4-dihydroisoquinolin-2(1H)-yl)-1,3,5-triazin-2-amine (9{6,16})

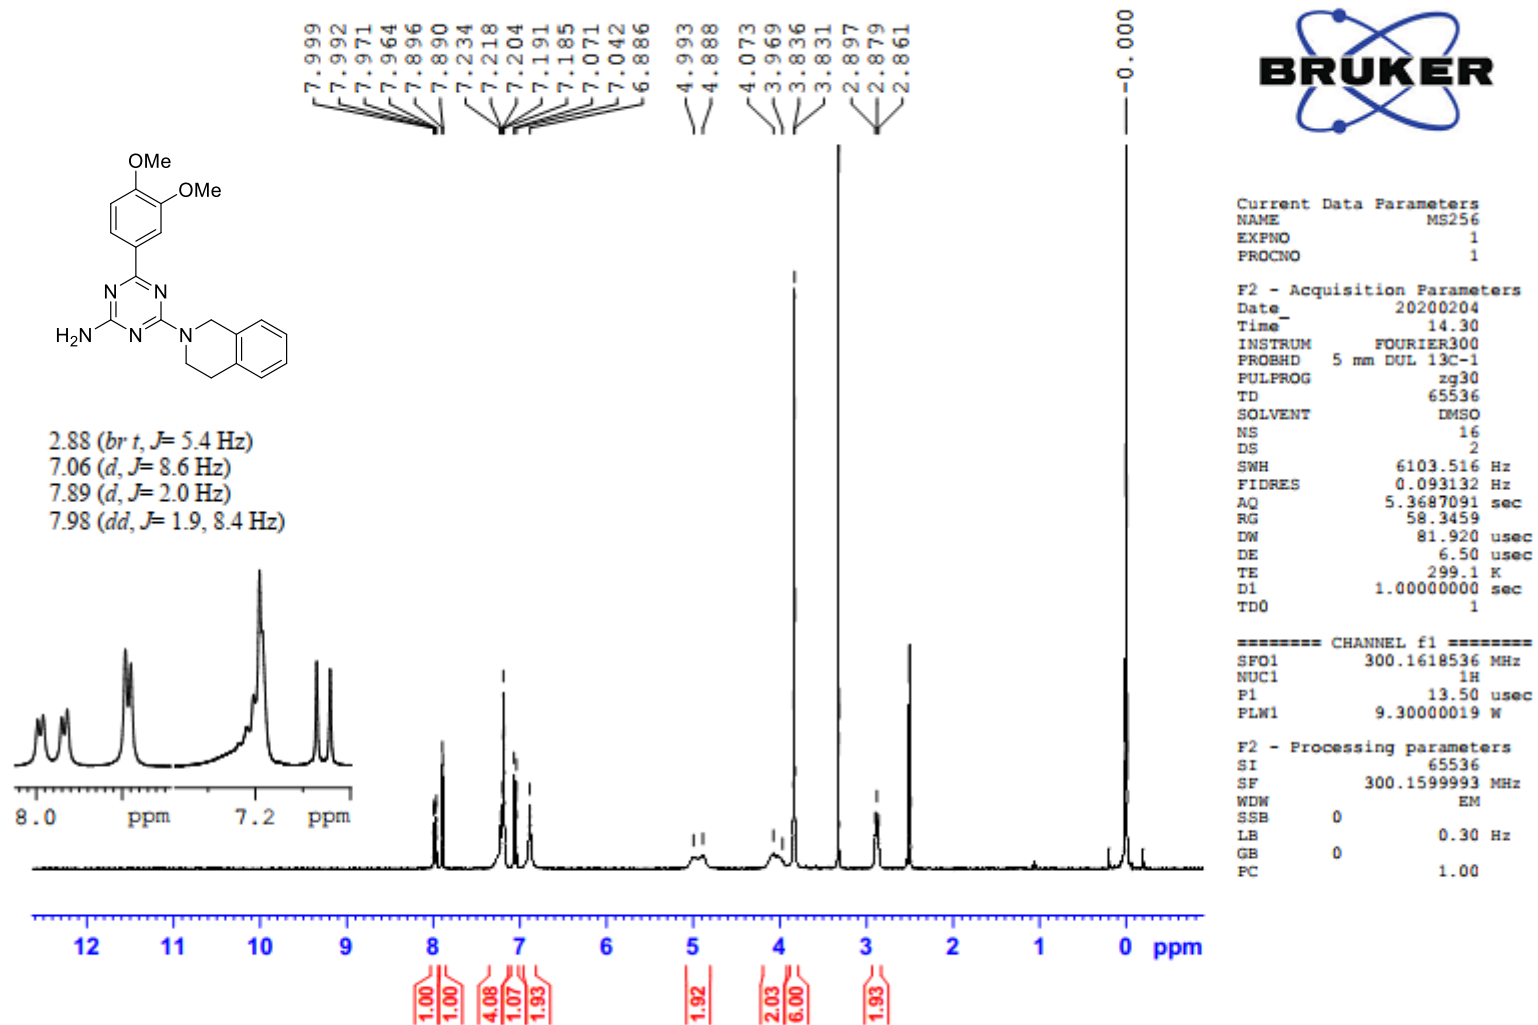

6-(3,4-Dimethoxyphenyl)-4-(3,4-dihydroisoquinolin-2(1H)-yl)-1,3,5-triazin-2-amine (9{6,16})

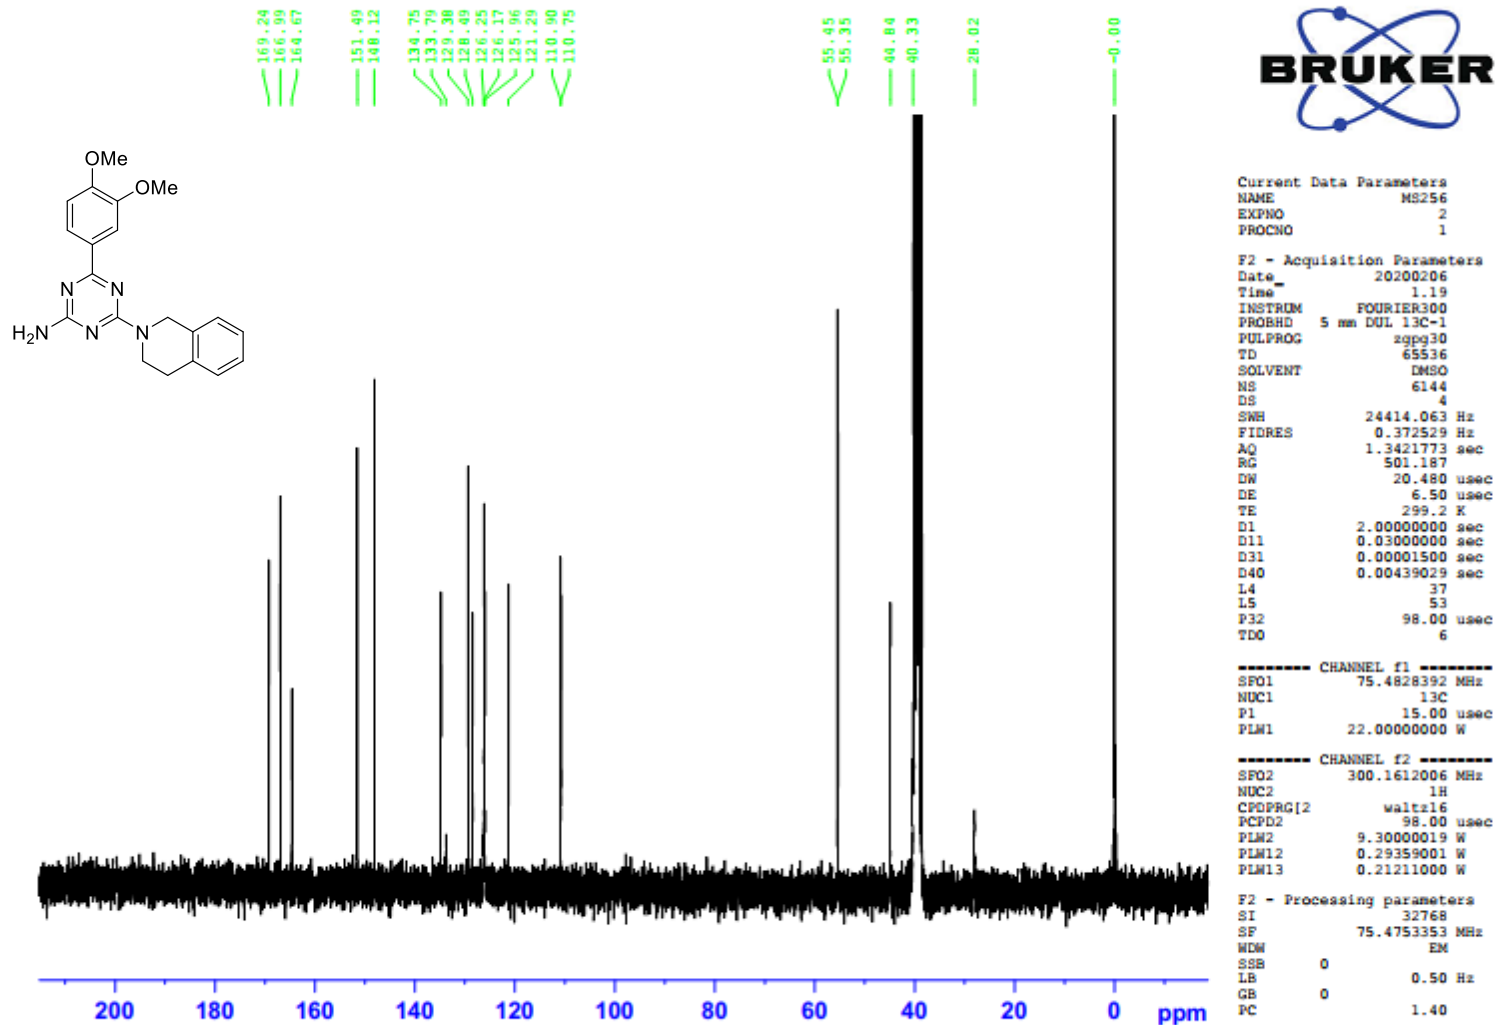

6-(3,4,5-Trimethoxyphenyl)-4-(3,4-dihydroisoquinolin-2(1H)-yl)-1,3,5-triazine-2-amine (9{6,17})

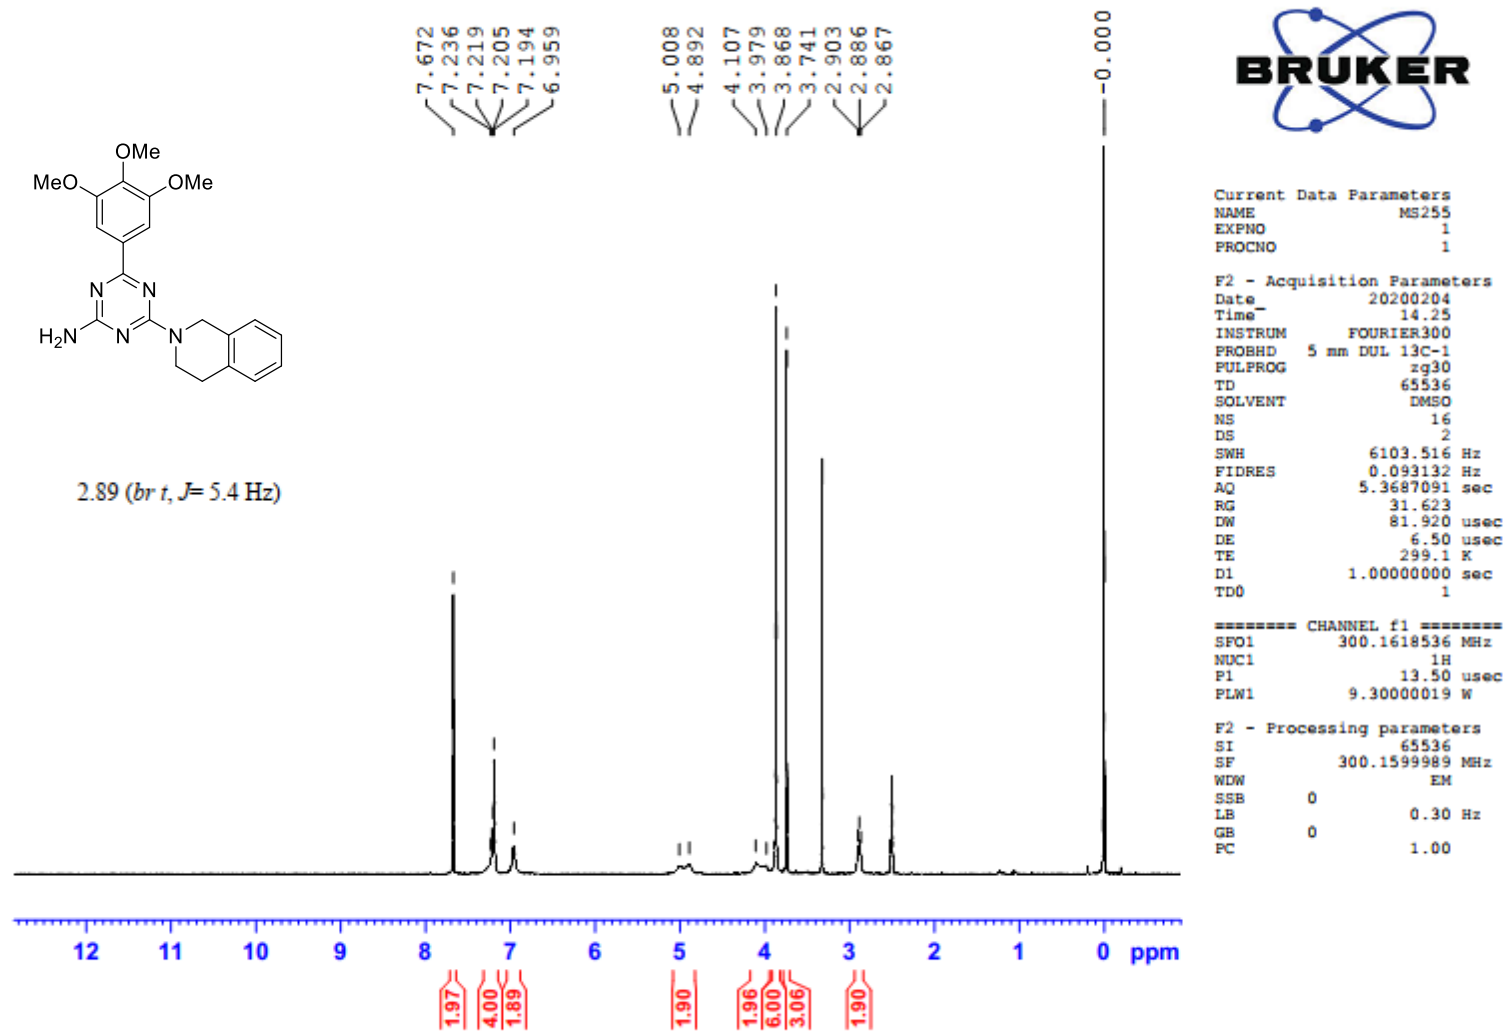

6-(3,4,5-Trimethoxyphenyl)-4-(3,4-dihydroisoquinolin-2(1H)-yl)-1,3,5-triazine-2-amine (9{6,17})

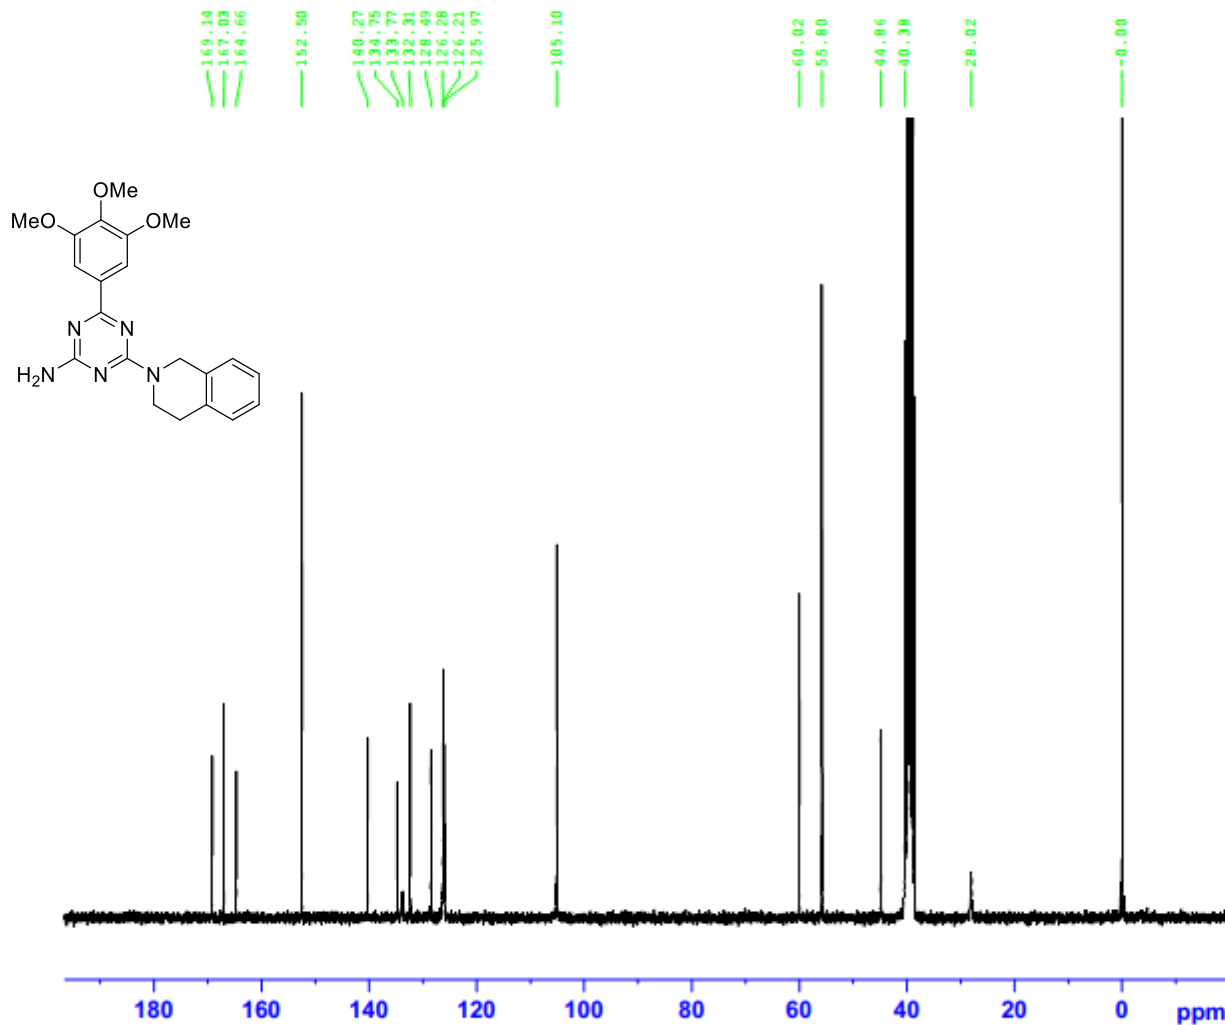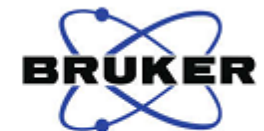

```

Current Data Parameters
NAME      MS255
EXPNO     2
PROCNO    1

F2 - Acquisition Parameters
Date_     20200206
Time      18.05
INSTRUM   FOURIER300
PROBHD    5 mm DUL 13C-1
PULPROG   zgpg30
TD         65536
SOLVENT   DMSO
NS         12288
DS         4
SWH        24414.063 Hz
FIDRES     0.372529 Hz
AQ         1.3421773 sec
RG         501.187
DW         20.480 usec
DE         6.50 usec
TE         300.1 K
D1         2.00000000 sec
D11        0.03000000 sec
D31        0.00001500 sec
D40        0.00439029 sec
L4         37
L5         53
P12        98.00 usec
TD0        12

----- CHANNEL f1 -----
SFO1      75.4828392 MHz
NUC1       13C
P1         15.00 usec
PLW1      22.00000000 W

----- CHANNEL f2 -----
SFO2      300.1612006 MHz
NUC2       1H
CPDPRG[2] waltz16
PCPD2     98.00 usec
PLW2      9.30000019 W
PLW12     0.29359001 W
PLW13     0.21211000 W

F2 - Processing parameters
SI         32768
SF         75.4753343 MHz
WDW        EM
SSB        0
LB         1.00 Hz
GB         0
PC         1.40
    
```

4-(3,4-Dihydroisoquinolin-2(1H)-yl)-6-(2-thienyl)-1,3,5-triazine-2-amine (9{6,18})

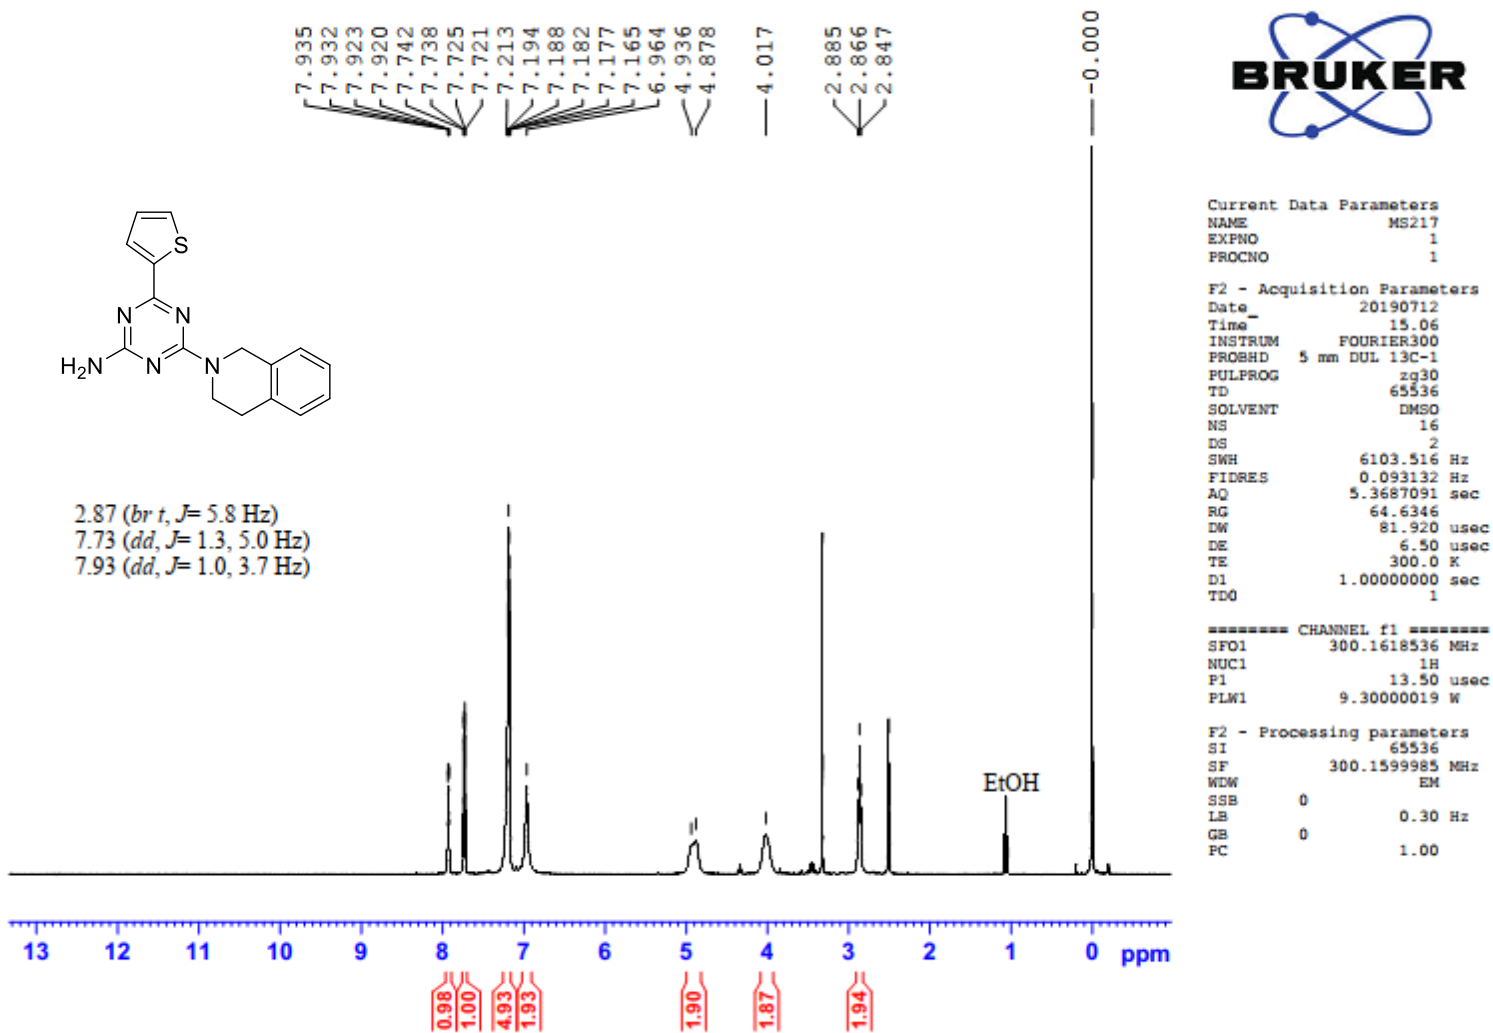



6-(4-Fluorophenyl)-4-(indolin-1-yl)-1,3,5-triazine-2-amine (**9**{7,3})

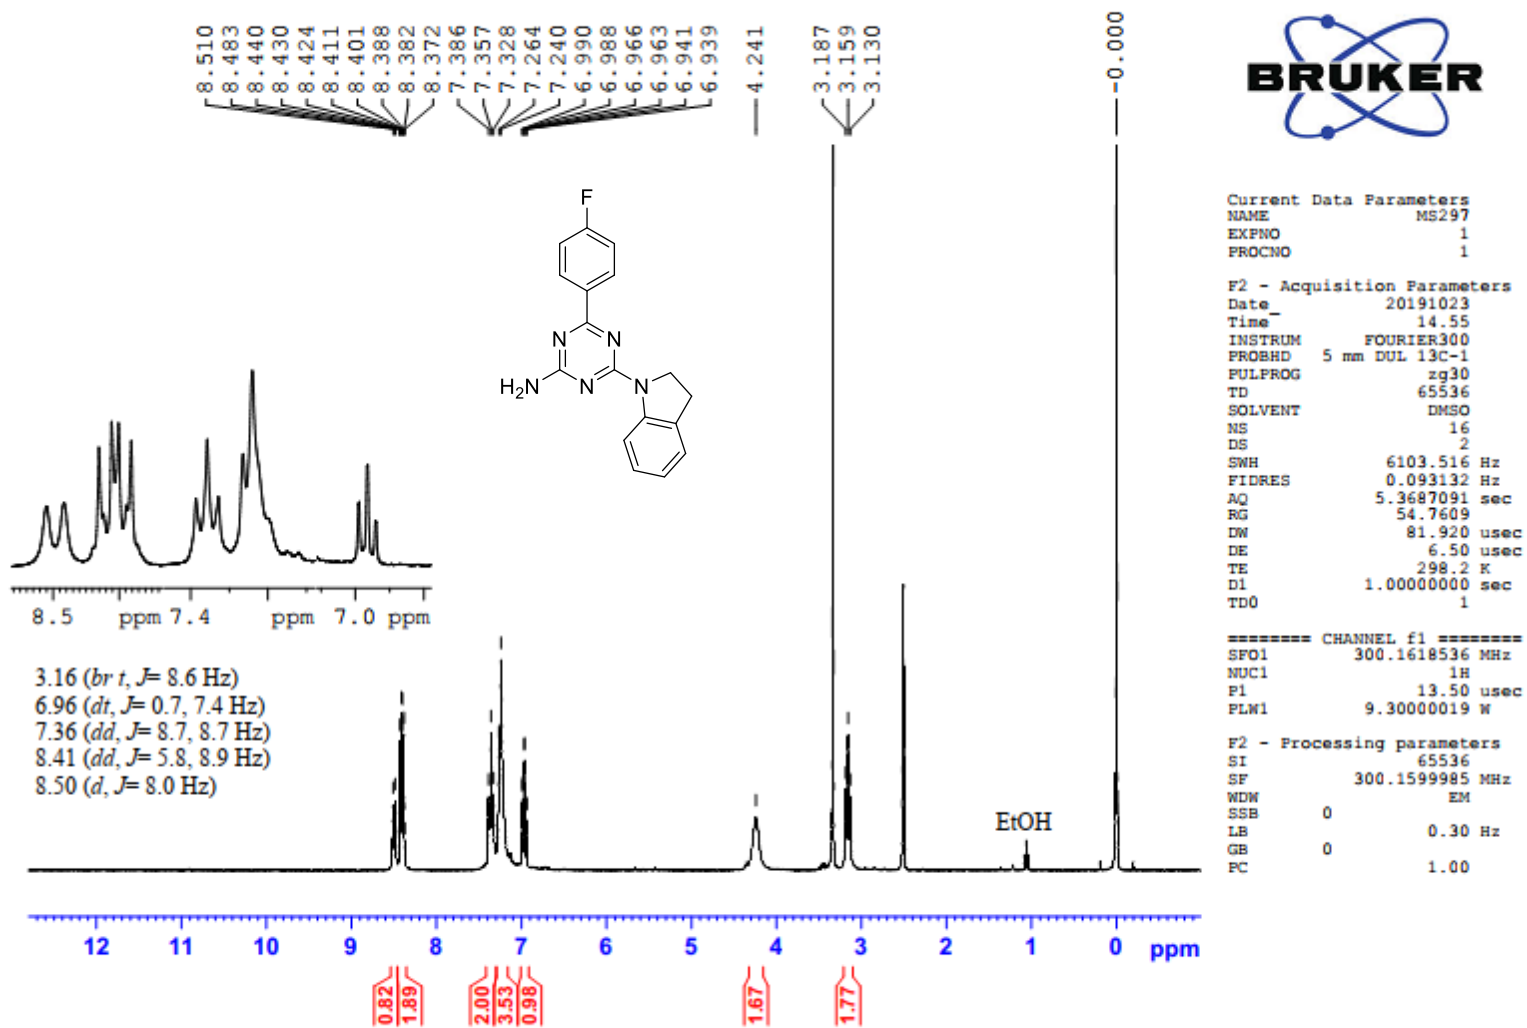



6-(4-Fluorophenyl)-4-(indolin-1-yl)-1,3,5-triazine-2-amine (9{7,3})

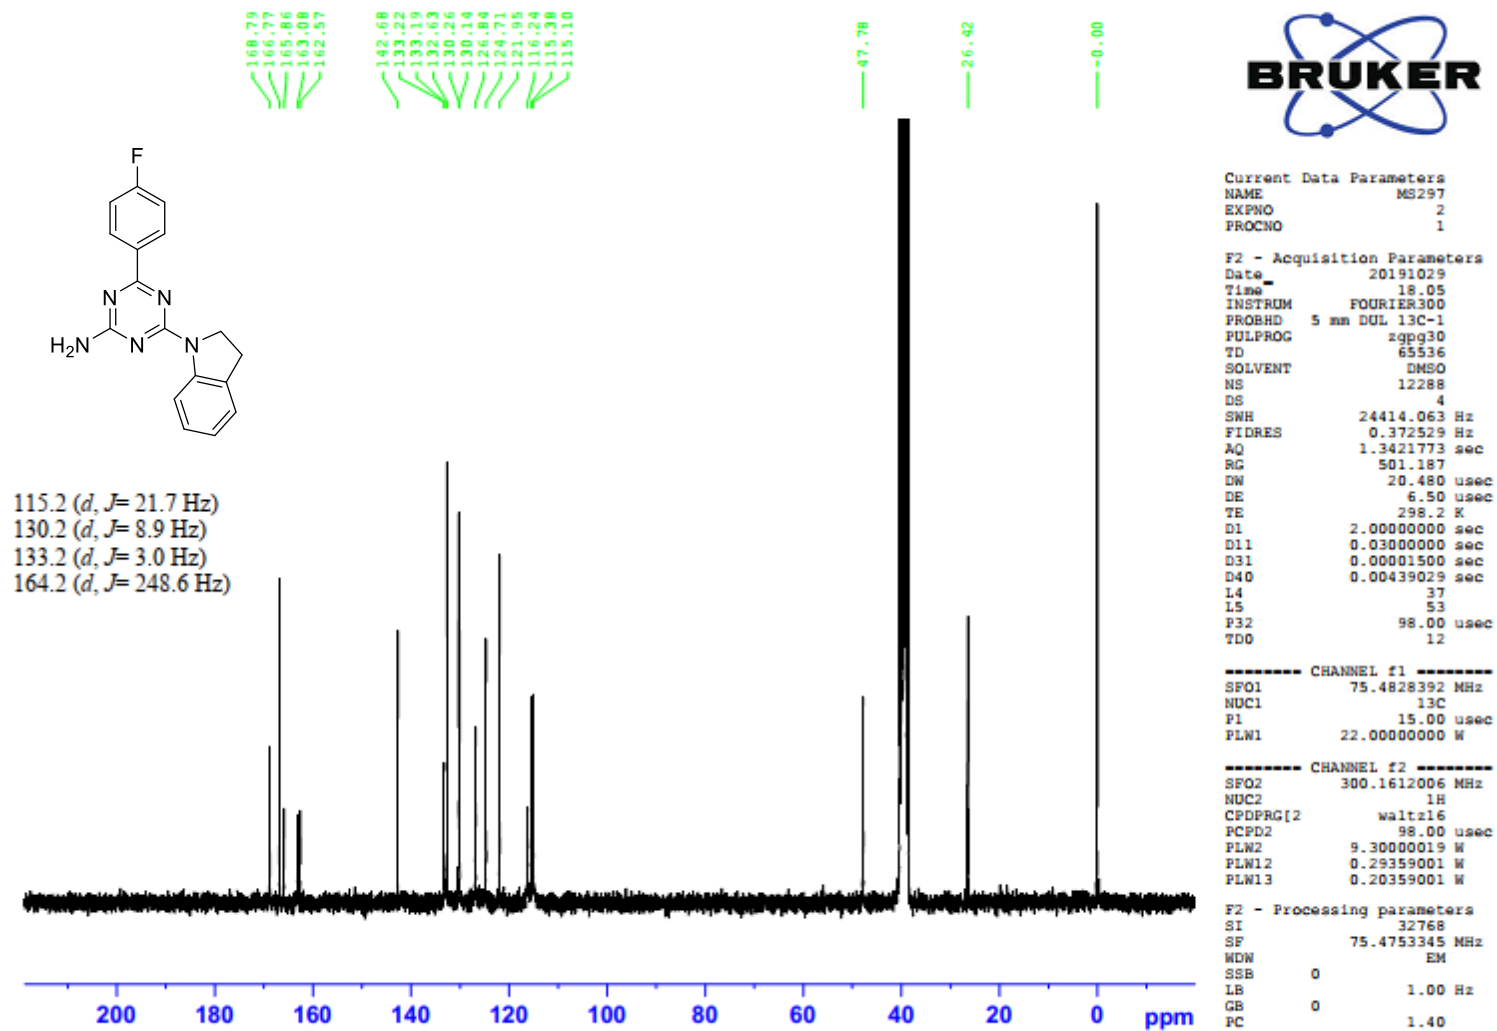

6-[4-(*N,N*-Dimethylamino)phenyl]-4-(indolin-1-yl)-1,3,5-triazine-2-amine (9{7,8})

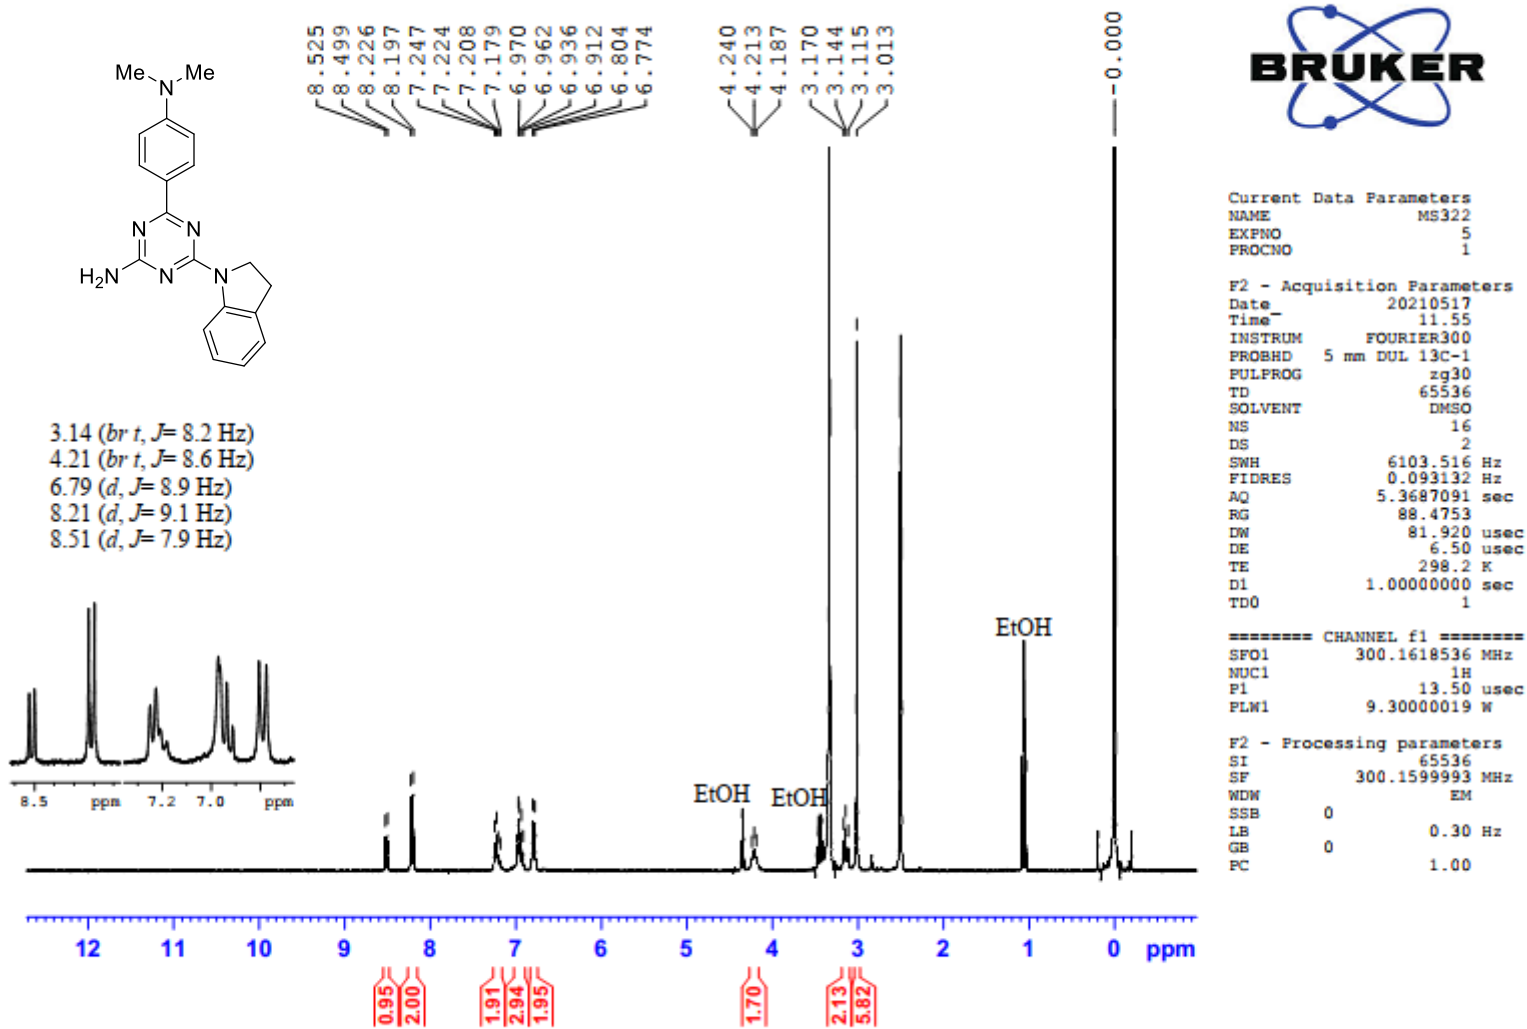

6-[4-(*N,N*-Dimethylamino)phenyl]-4-(indolin-1-yl)-1,3,5-triazine-2-amine (9{7,8})

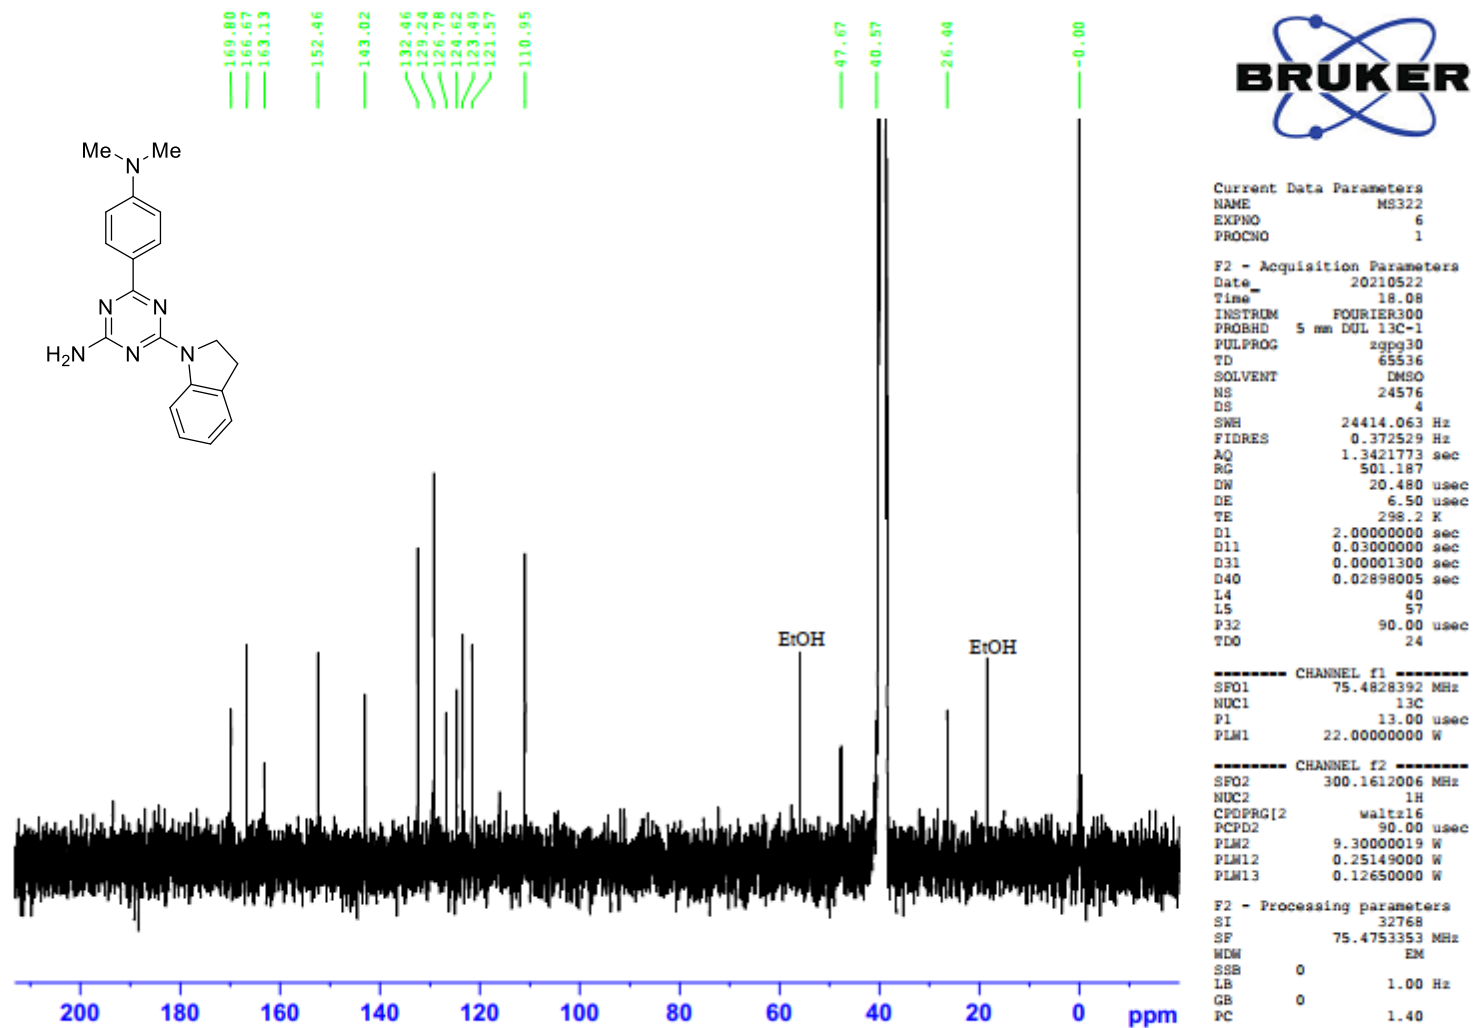

6-(4-Methoxyphenyl)-4-(indolin-1-yl)-1,3,5-triazine-2-amine (**9**{7,9})

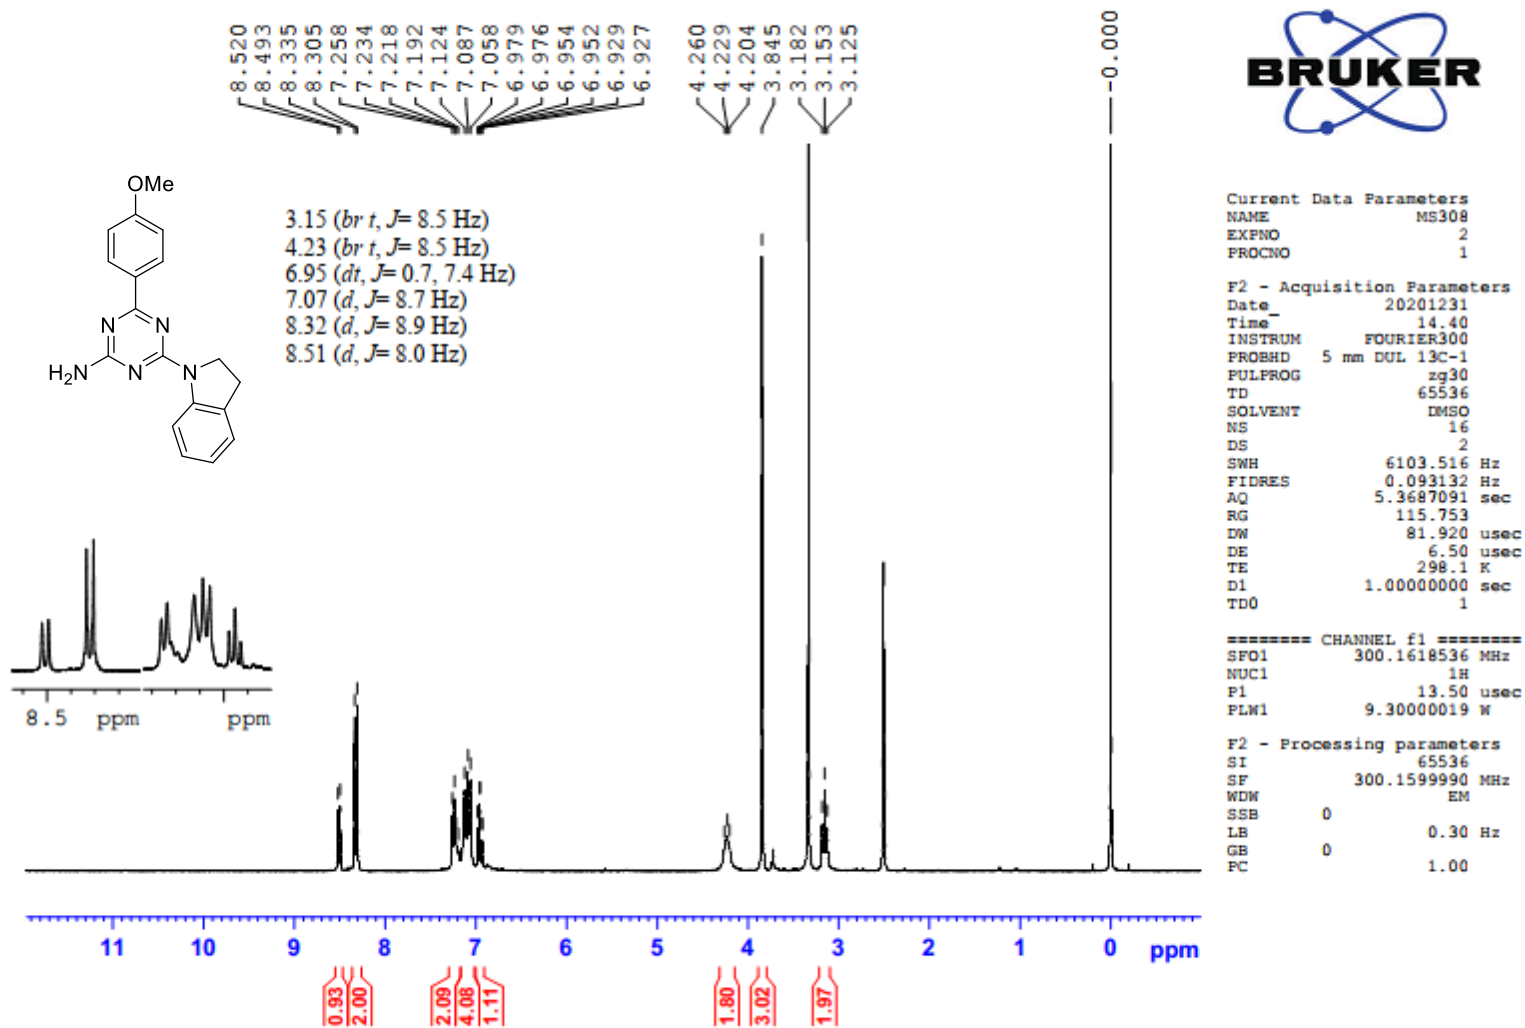

6-(4-Methoxyphenyl)-4-(indolin-1-yl)-1,3,5-triazine-2-amine (9{7,9})

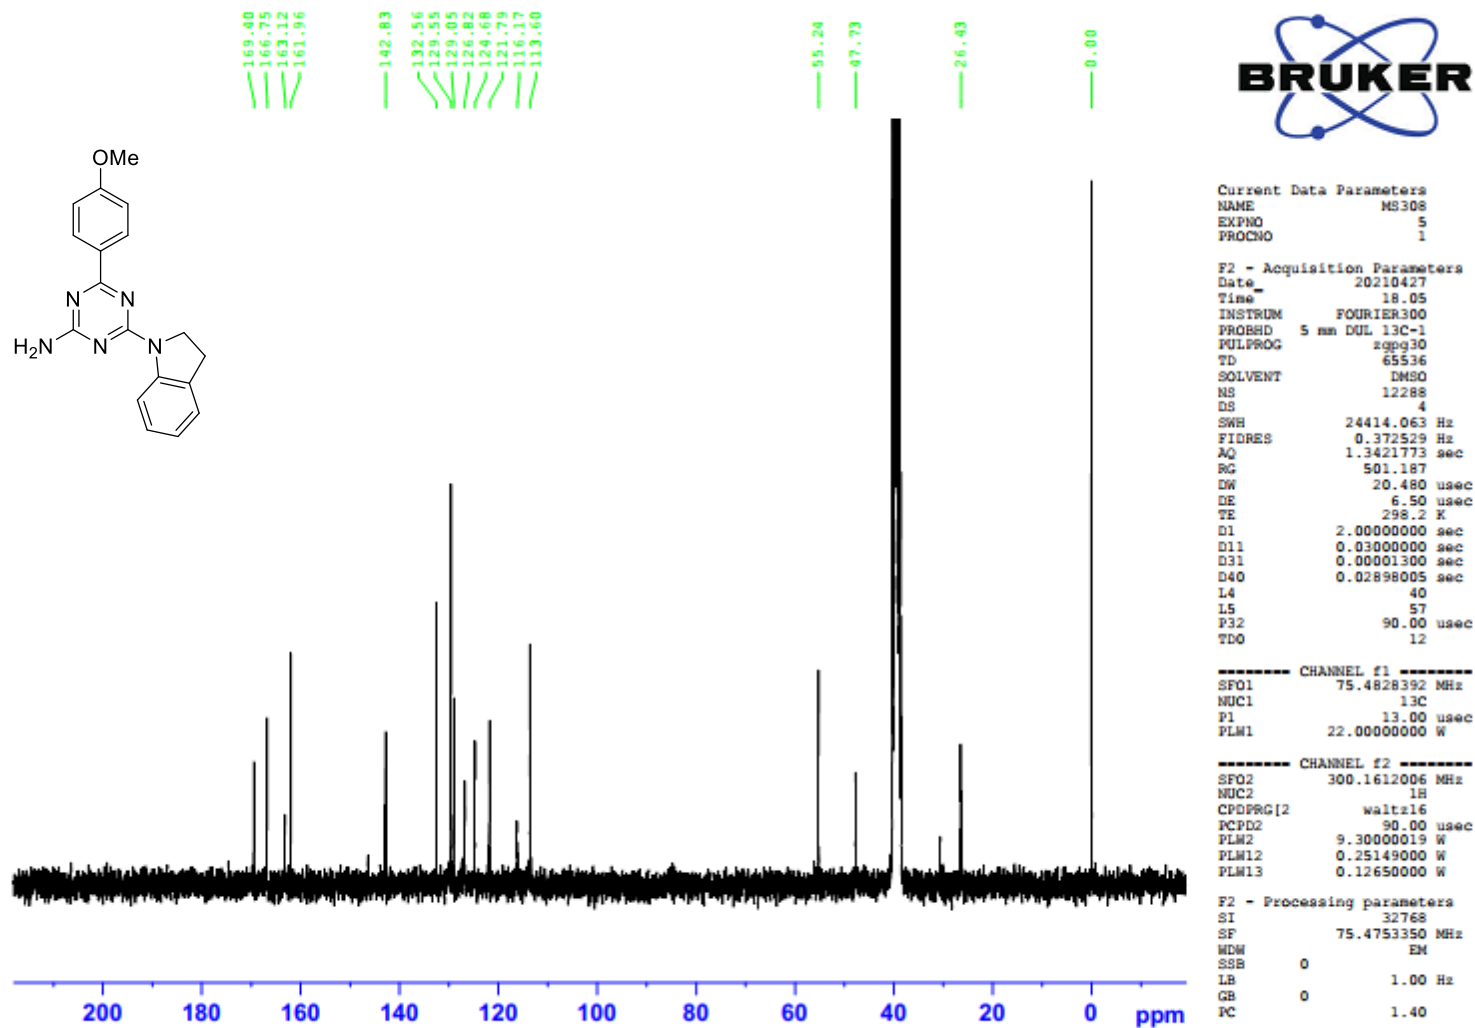

6-[4-(Trifluoromethyl)phenyl]-4-(indolin-1-yl)-1,3,5-triazine-2-amine (9{7,11})

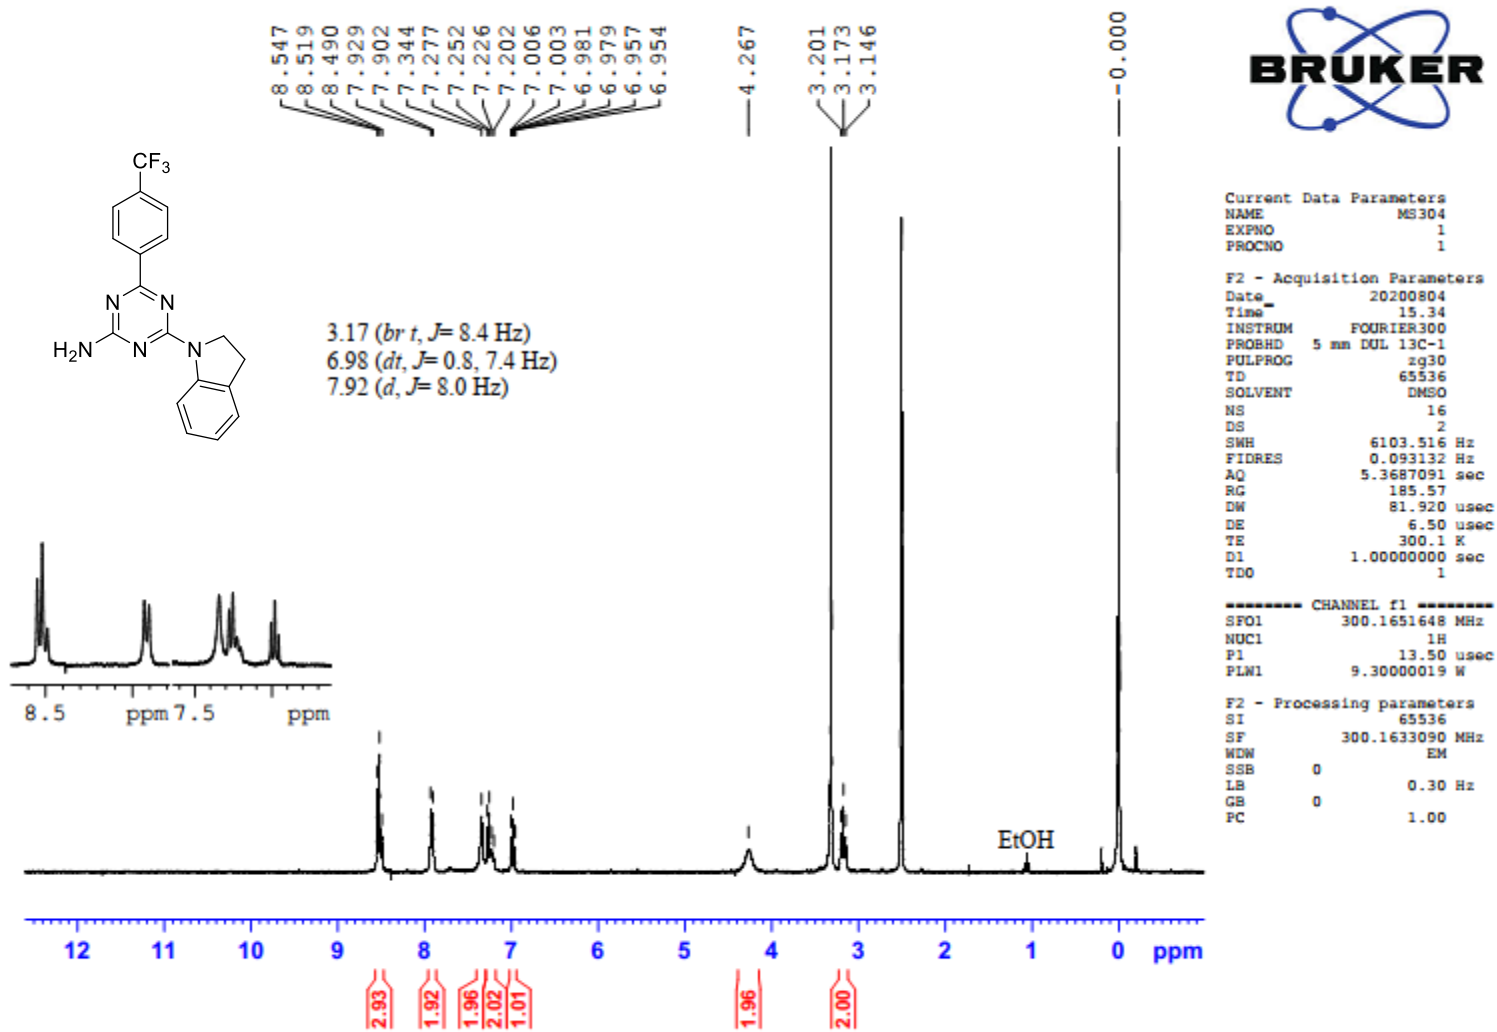

6-[4-(Trifluoromethoxy)phenyl]-4-(indolin-1-yl)-1,3,5-triazine-2-amine (**9**{7,12})

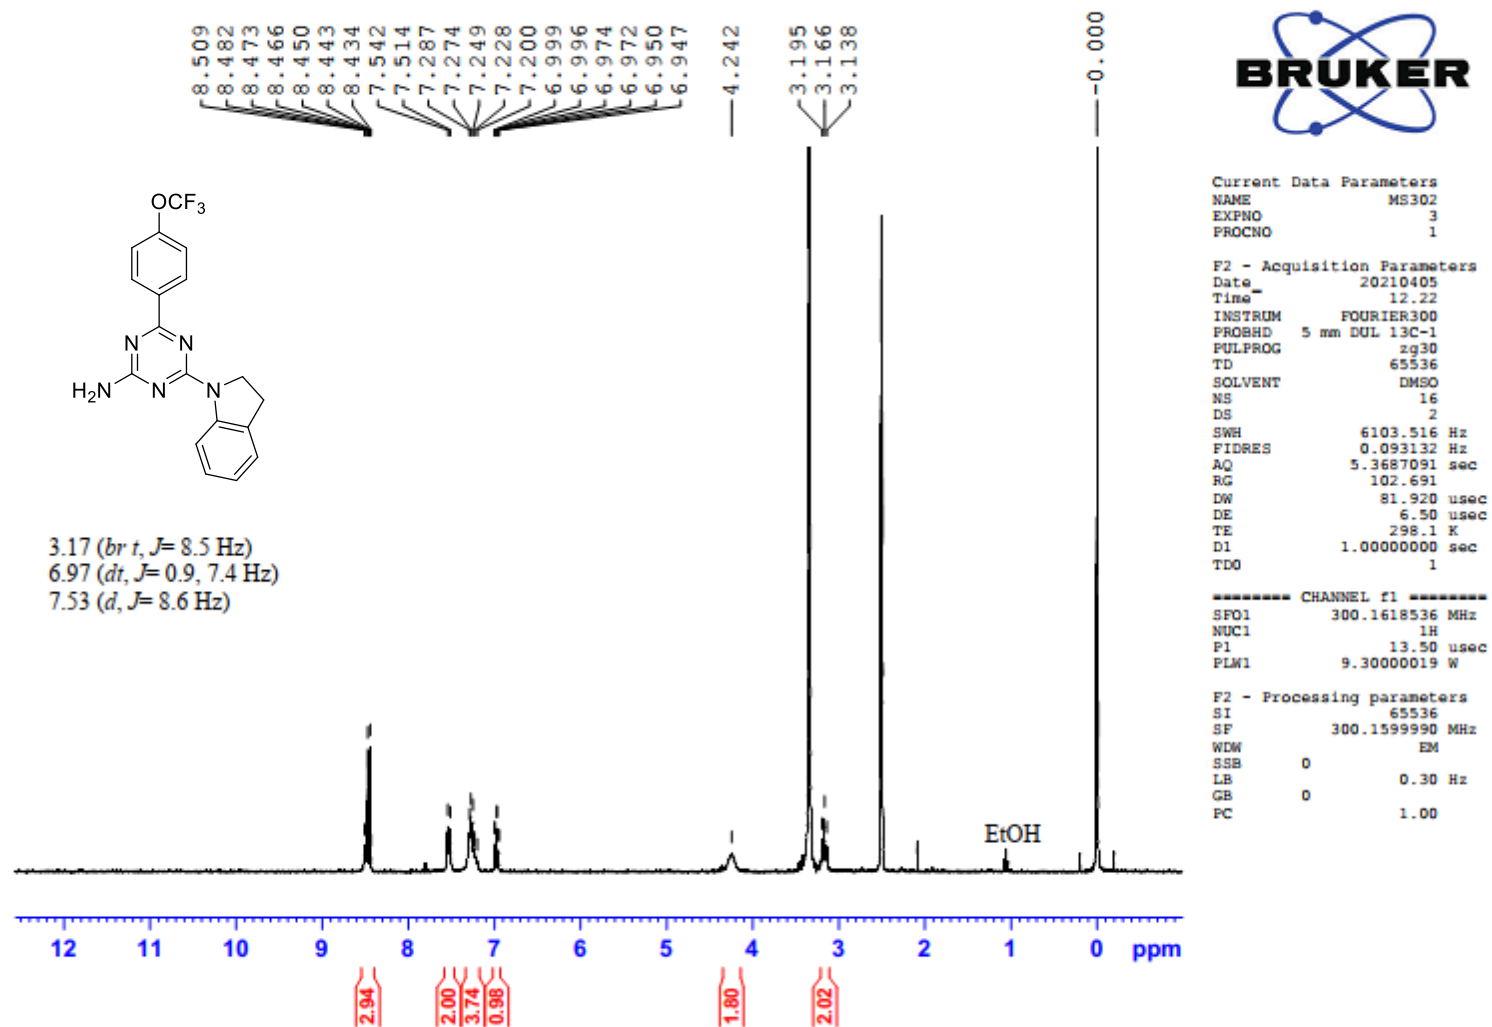

6-(4-(Benzyloxy)phenyl)-4-(indolin-1-yl)-1,3,5-triazine-2-amine (9{7,15})

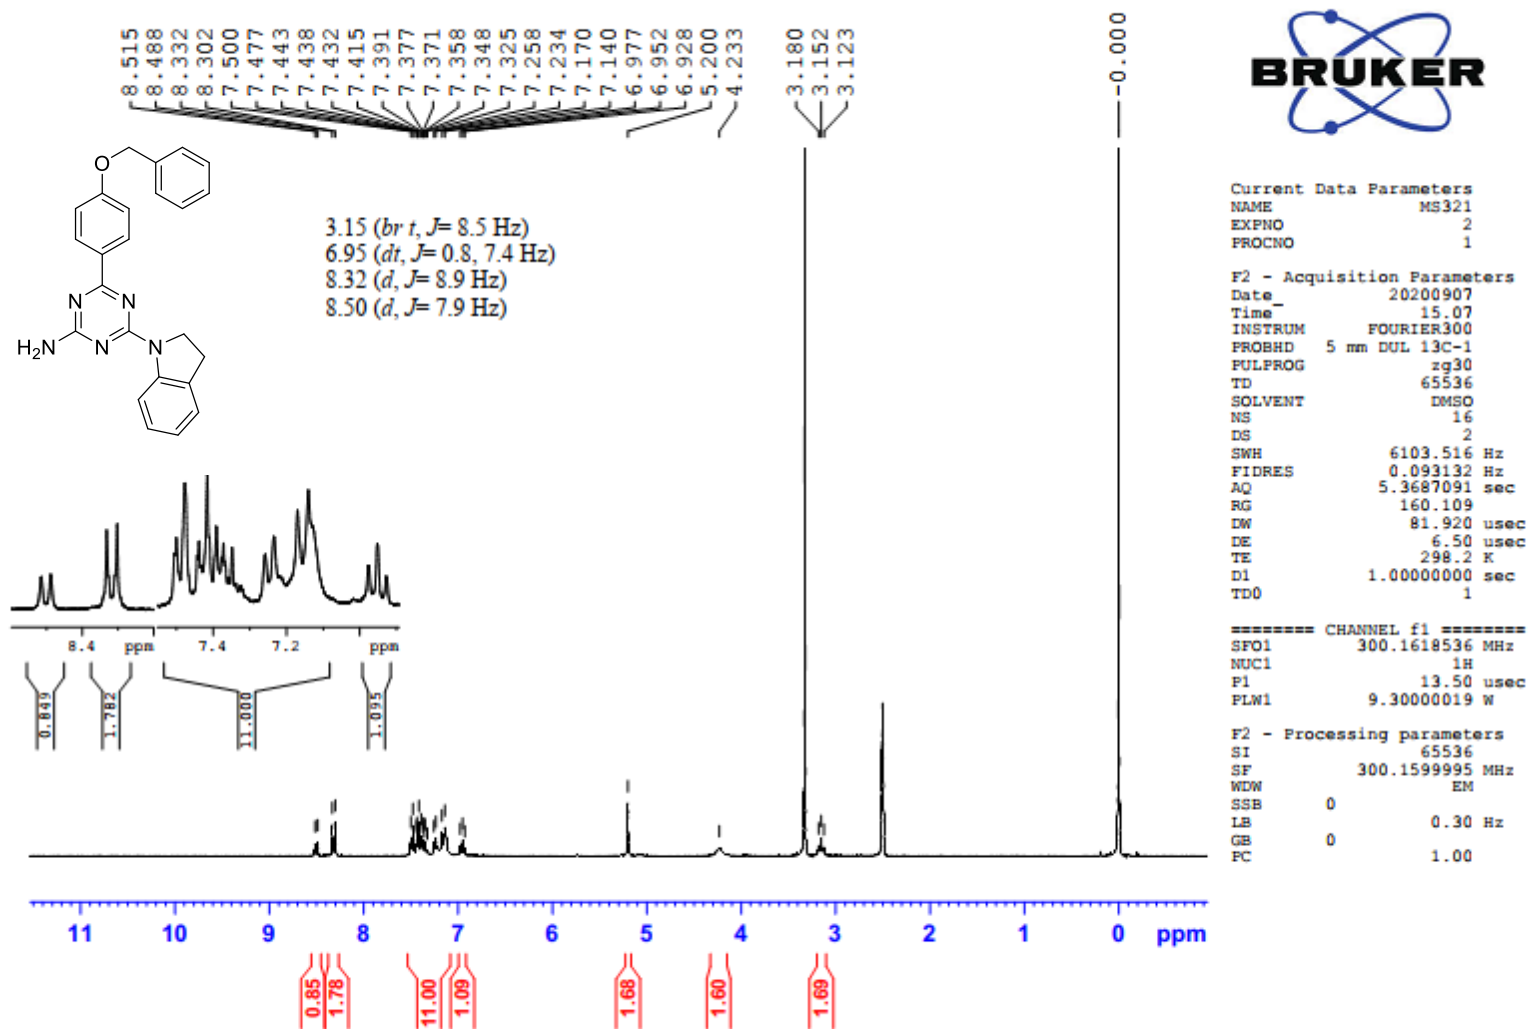



6-(4-(Benzyloxy)phenyl)-4-(indolin-1-yl)-1,3,5-triazine-2-amine (9{7,15})

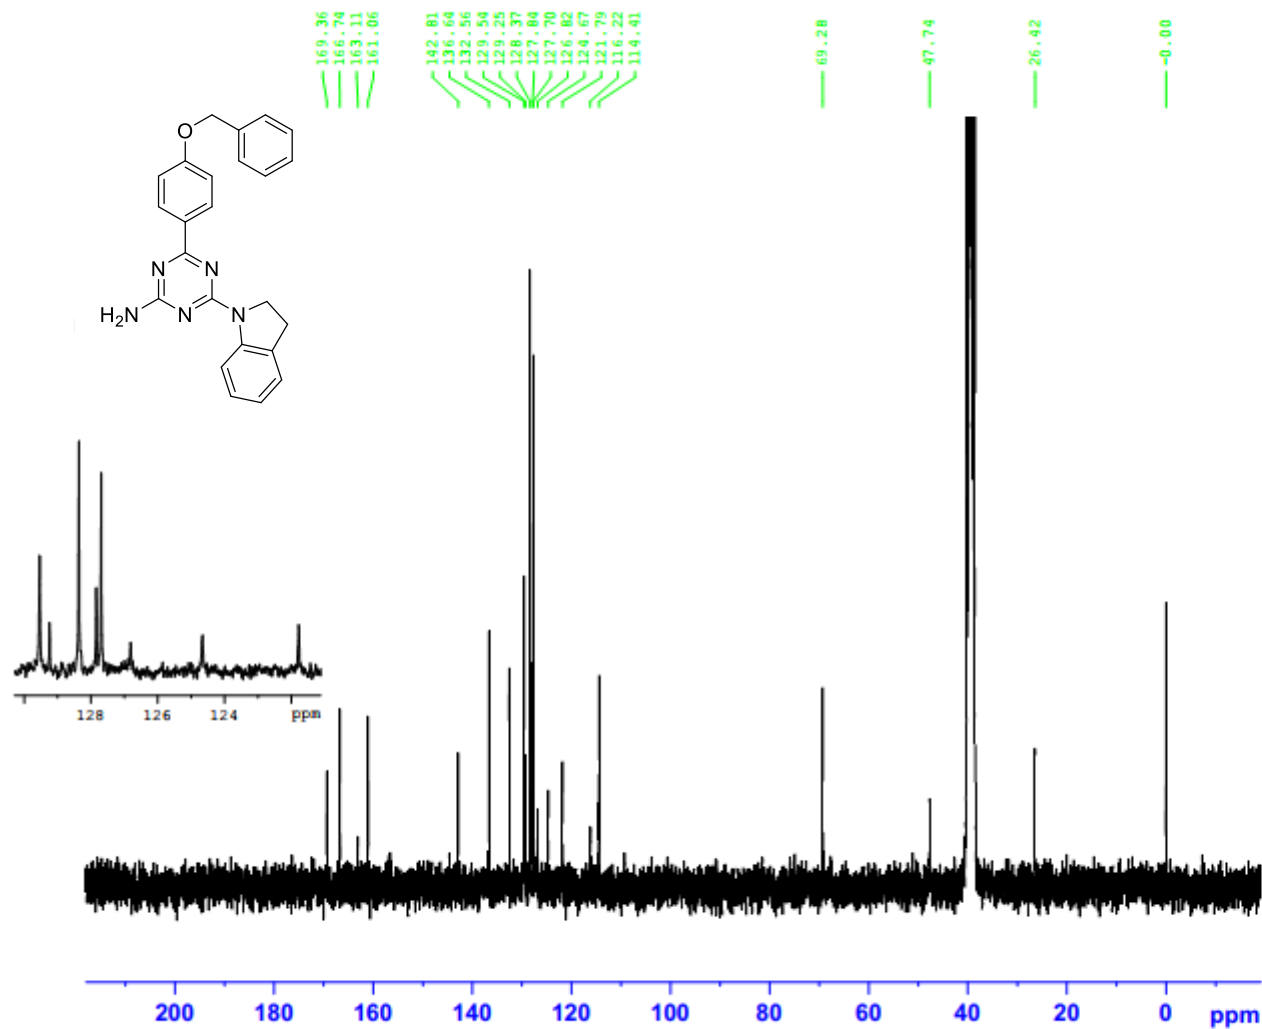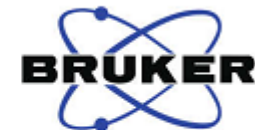

Current Data Parameters  
NAME MS321  
EXPNO 7  
PROCNO 1

F2 - Acquisition Parameters  
Date\_ 20210820  
Time 18.05  
INSTRUM FOURIER300  
PROBHD 5 mm DUL 13C-1  
PULPROG zgpg30  
TD 65536  
SOLVENT DMSO  
NS 12288  
DS 4  
SWH 24414.063 Hz  
FIDRES 0.372529 Hz  
AQ 1.3421773 sec  
RG 501.187  
DW 20.480 usec  
DE 6.50 usec  
TE 298.2 K  
D1 2.00000000 sec  
D11 0.03000000 sec  
D31 0.00001300 sec  
D40 0.02898005 sec  
L4 40  
L5 57  
P32 90.00 usec  
TDO 12

----- CHANNEL f1 -----  
SFO1 75.4828392 MHz  
NUC1 13C  
P1 13.00 usec  
PLW1 22.00000000 W

----- CHANNEL f2 -----  
SFO2 300.1612006 MHz  
NUC2 1H  
CPDPRG2 waltz16  
PCPD2 90.00 usec  
PLW2 9.30000019 W  
PLW12 0.25149000 W  
PLW13 0.12650000 W

F2 - Processing parameters  
SI 32768  
SF 75.4753354 MHz  
WDW EM  
SSB 0  
LB 1.00 Hz  
GB 0  
PC 1.40

6-(3,4-Dimethoxyphenyl)-4-(indolin-1-yl)-1,3,5-triazine-2-amine (**9**{7,16})

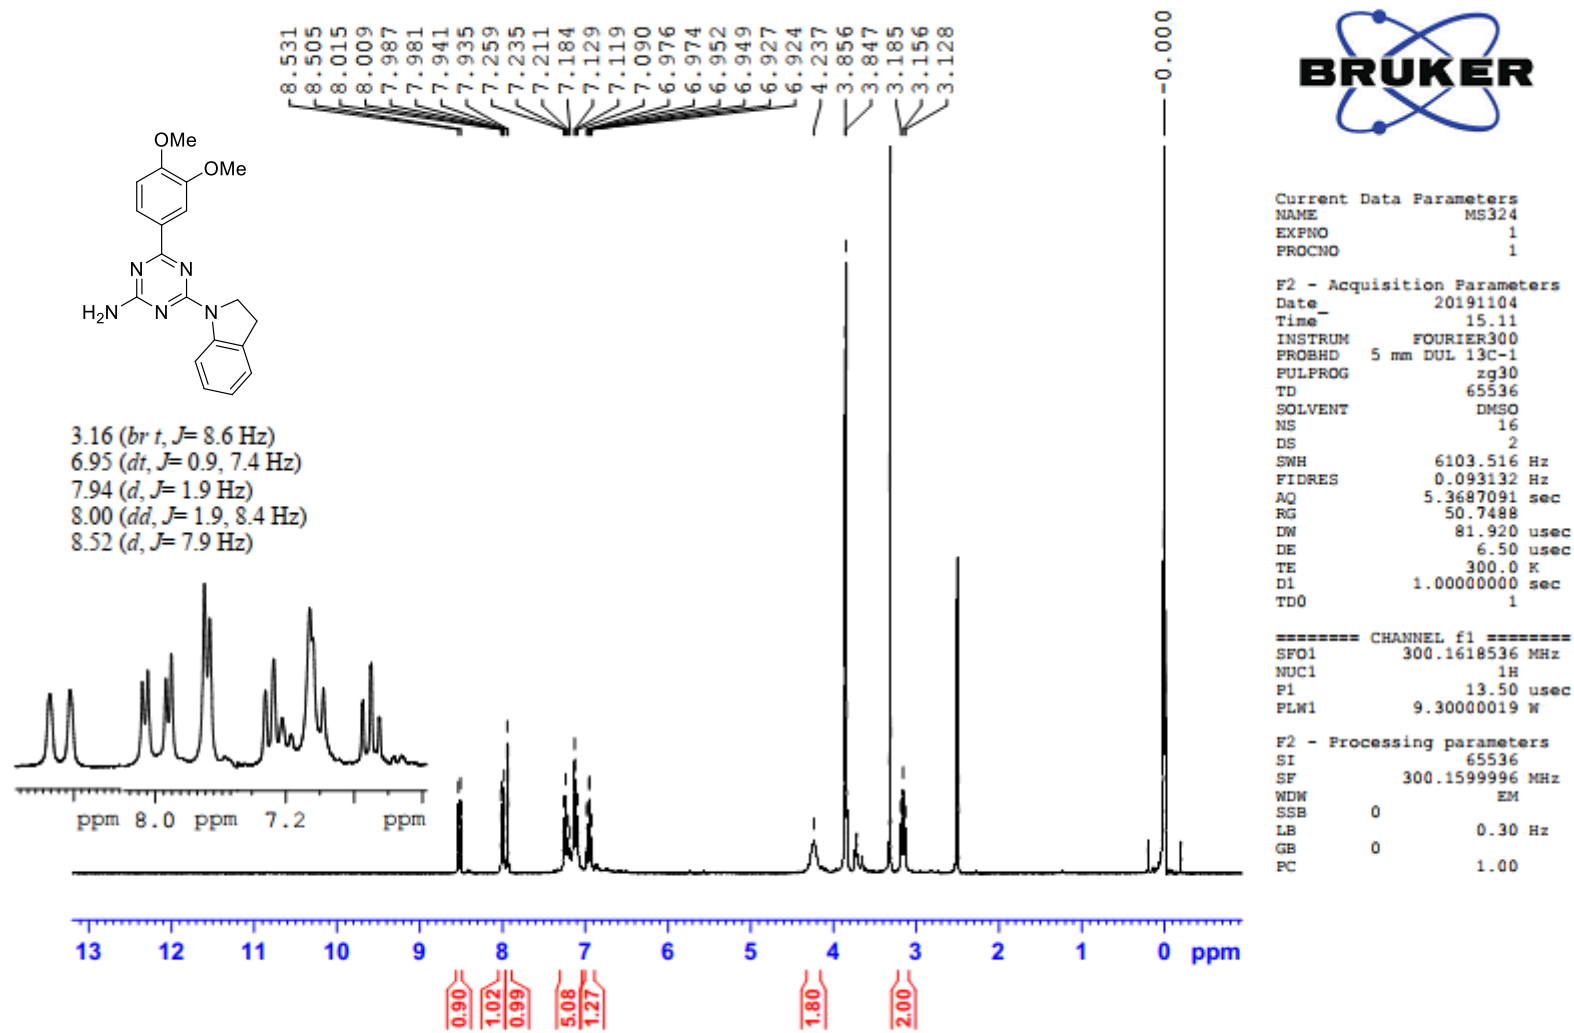

6-(3,4-Dimethoxyphenyl)-4-(indolin-1-yl)-1,3,5-triazine-2-amine (**9**{7,16})

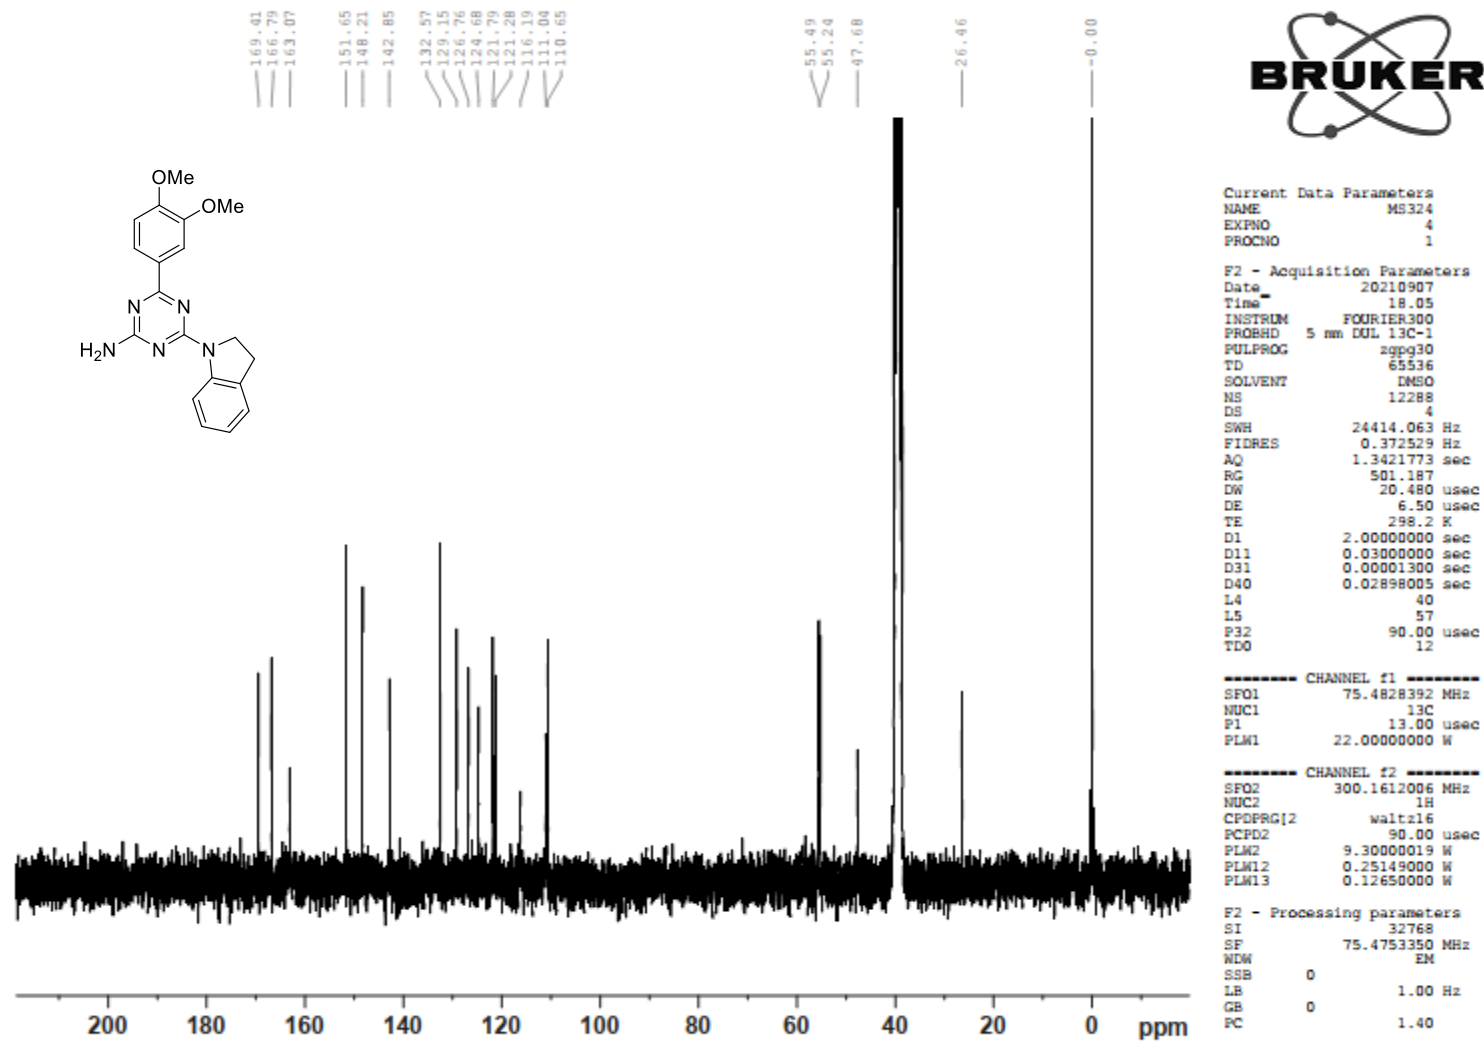

6-(3,4,5-Trimethoxyphenyl)-4-(indolin-1-yl)-1,3,5-triazine-2-amine (9{7,17})

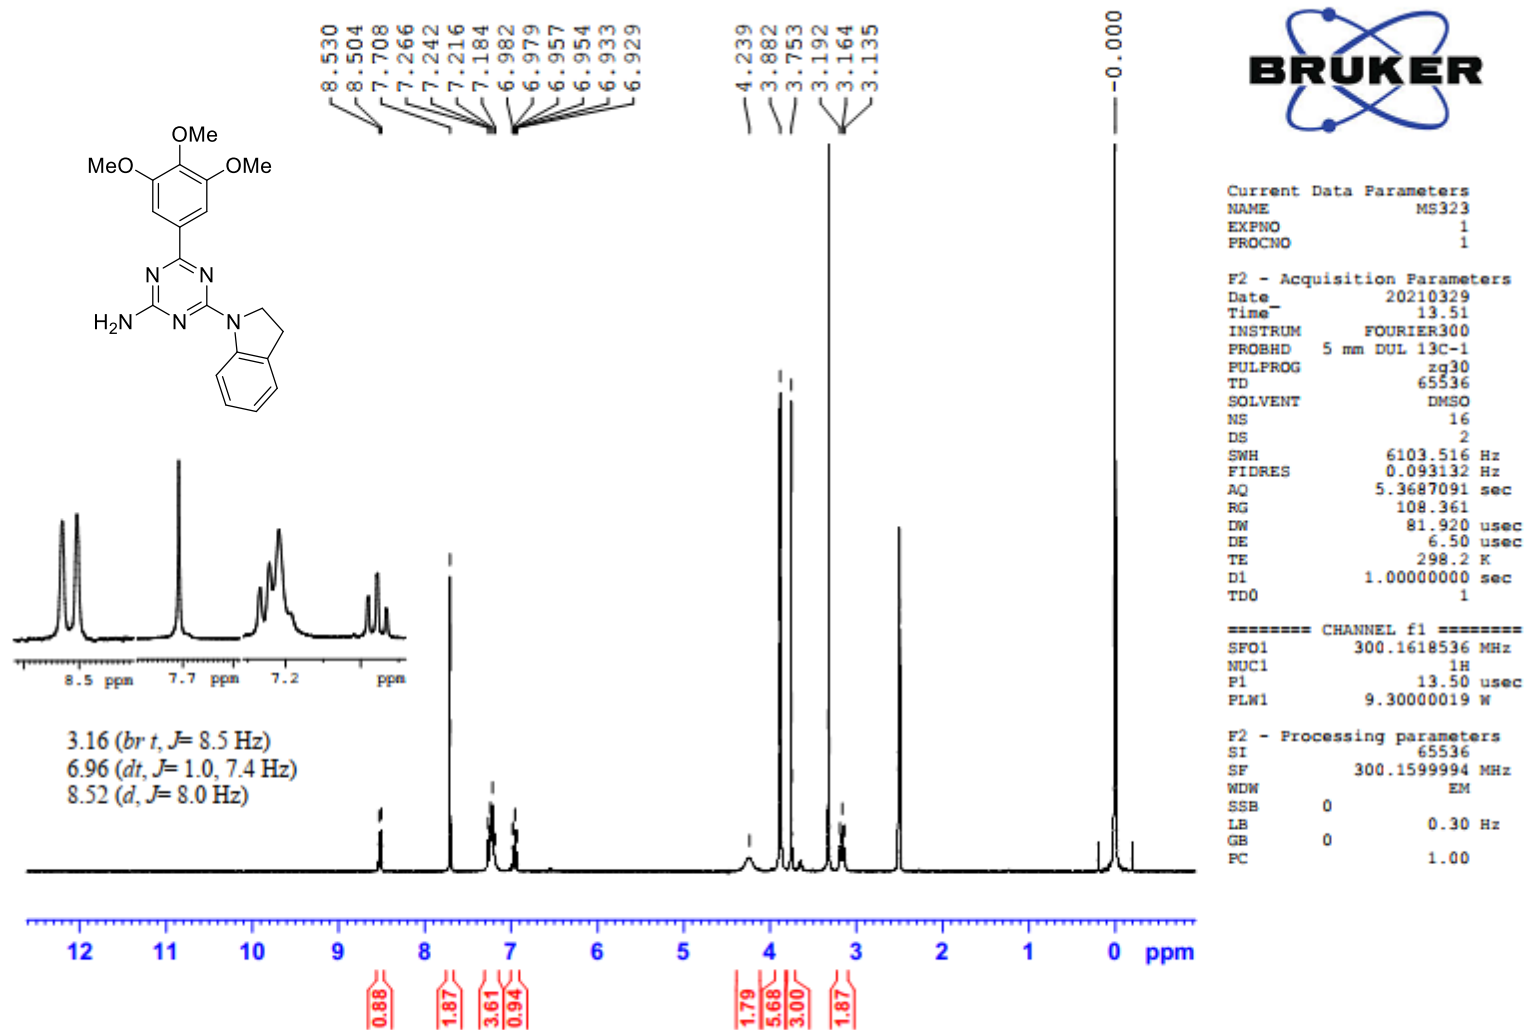

6-(3,4,5-Trimethoxyphenyl)-4-(indolin-1-yl)-1,3,5-triazine-2-amine (9{7,17})

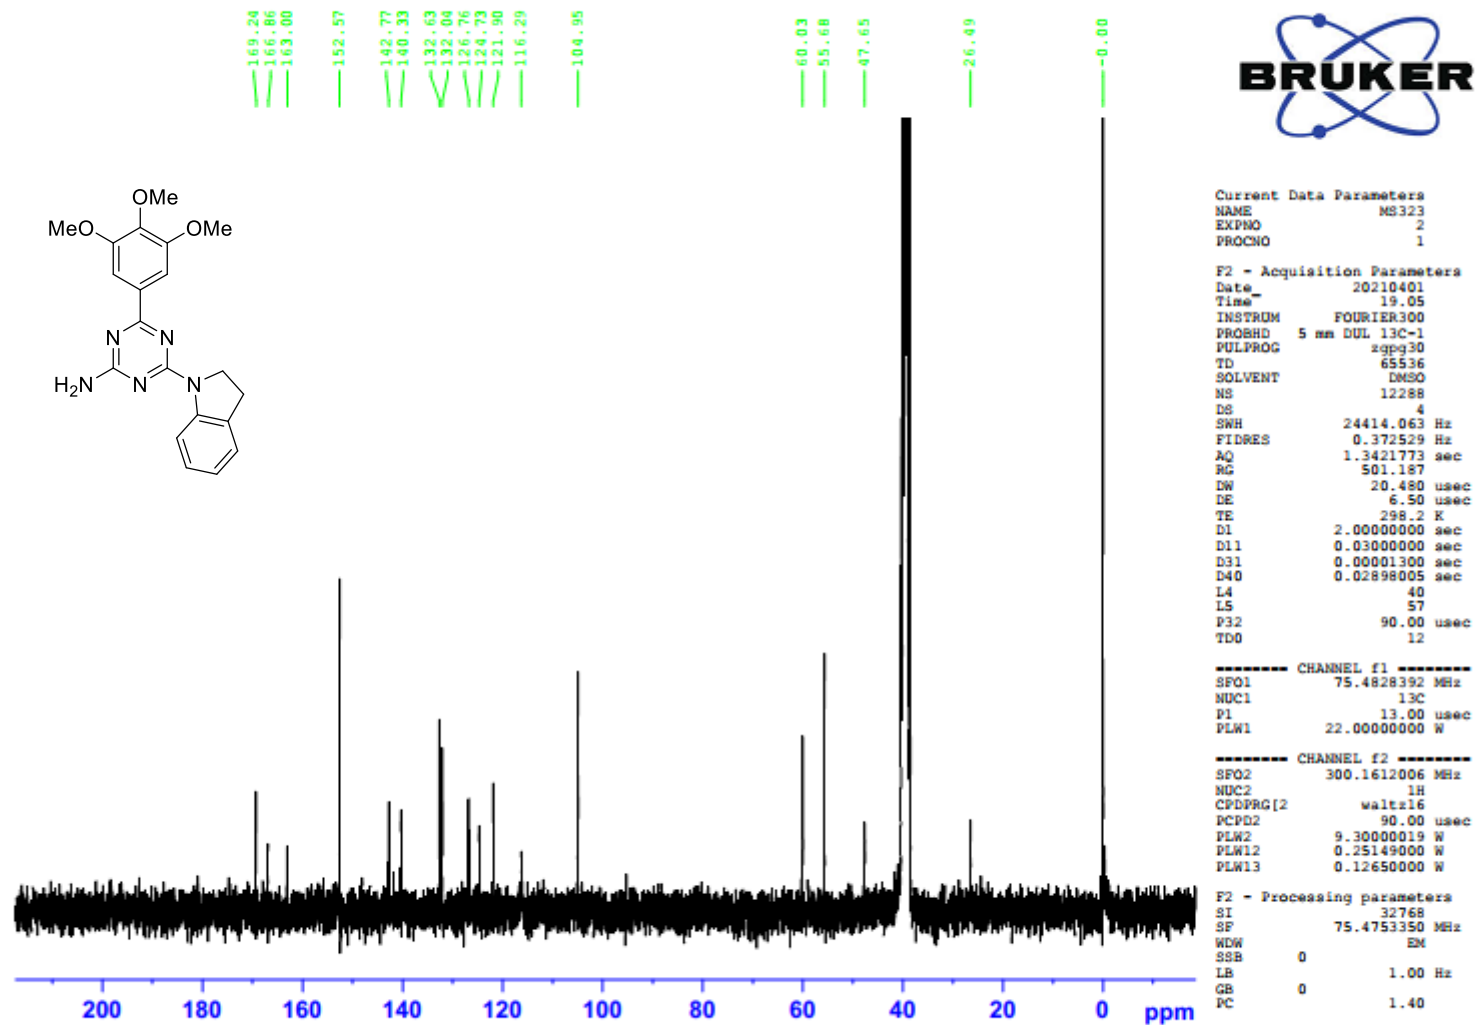

4-(Indolin-1-yl)-6-(2-thienyl)-1,3,5-triazine-2-amine (**9**{7,18})

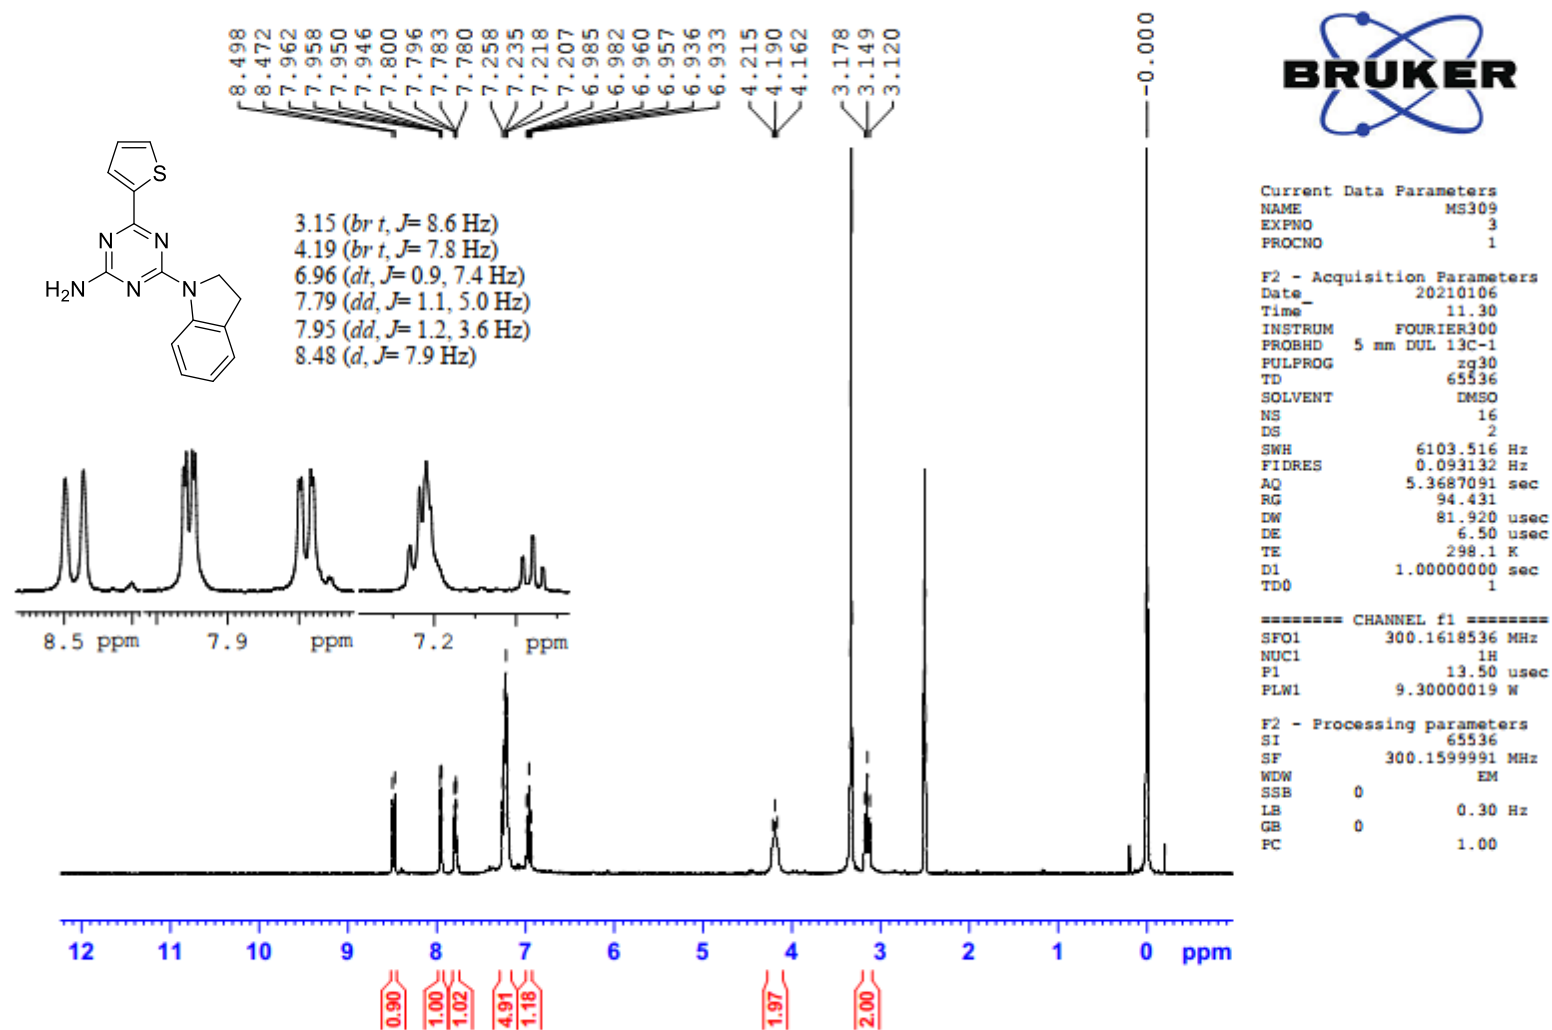

4-(Indolin-1-yl)-6-(2-thienyl)-1,3,5-triazine-2-amine (9{7,18})

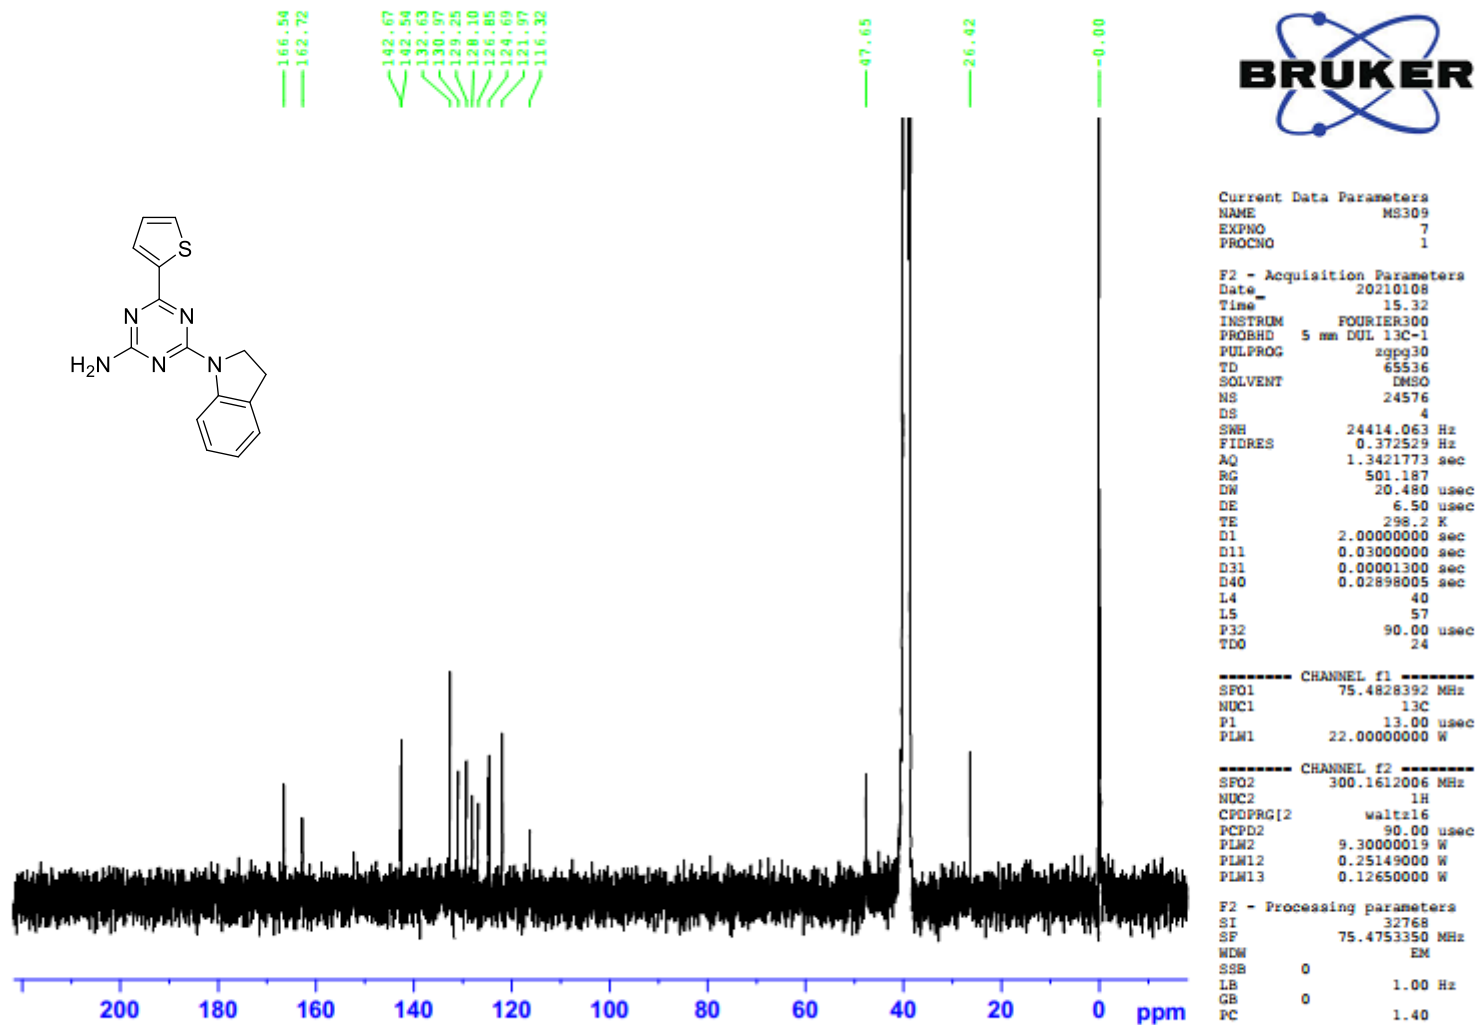

Supplement: d3ra08091a1.pdf [file d3ra08091a1.pdf]
